# Supplementary material for: NKX2-5 mutations causative for congenital heart disease retain functionality and are directed to hundreds of targets
Source: eLife journal article supplement (doi:10.7554/elife.06942), 2015-07-06
Supplement: supp [file elife-06942-supp-v1.zip]

Archive with 21 entries (21 files):
- elife_poa_e06942_Figure_1_figure_supplement_3.pdf
- elife_poa_e06942_Figure_1_figure_supplement_7.pdf
- elife_poa_e06942_Figure_4_figure_supplement_1.pdf
- elife_poa_e06942_Figure_5_figure_supplement_2.pdf
- elife_poa_e06942_Figure_3_figure_supplement_1.pdf
- elife_poa_e06942_Figure_1_figure_supplement_4.pdf
- elife_poa_e06942_Figure_1_figure_supplement_6.pdf
- elife_poa_e06942_Figure_5_figure_supplement_1.pdf
- elife_poa_e06942_Figure_1_figure_supplement_9.pdf
- elife_poa_e06942_Figure_2_figure_supplement_2.pdf
- elife_poa_e06942_Figure_1_figure_supplement_5.pdf
- elife_poa_e06942_Figure_2_figure_supplement_3.pdf
- elife_poa_e06942_Figure_4_figure_supplement_2.pdf
- elife_poa_e06942_Supplementary_File_2.docx
- elife_poa_e06942_Figure_2_figure_supplement_1.pdf
- elife_poa_e06942_Figure_1_figure_supplement_2.pdf
- elife_poa_e06942_Supplementary_File_1.xlsx
- elife_poa_e06942_Figure_4_figure_supplement_3.pdf
- elife_poa_e06942_Figure_1_figure_supplement_8.pdf
- elife_poa_e06942_Figure_1_figure_supplement_1.pdf
- elife_poa_e06942_Figure_3_figure_supplement_2.pdf
