# Supplementary material for: NKX2-5 mutations causative for congenital heart disease retain functionality and are directed to hundreds of targets
Source: eLife journal article supplement (doi:10.7554/elife.06942), 2015-07-06
Supplement: supp [file elife-06942-supp-v1.zip › elife_poa_e06942_Supplementary_File_1.xlsx]

## Sheet: DamID dataset summary
Tabs number	Transcription Factor	Dataset description	Source
1	DAM-NKX2-5	N-terminal DamID fusion peaks	peak coordinates and gene annotation from GREAT
2	Dam-NKX2-5dY191C	N-terminal DamID fusion peaks	peak coordinates and gene annotation from GREAT
3	Dam-NKX2-5dHD	N-terminal DamID fusion peaks	peak coordinates and gene annotation from GREAT
4	Dam-NKX2-5YRD	N-terminal DamID fusion peaks	peak coordinates from CisGenome
5	Dam-ELK1	N-terminal DamID fusion peaks	peak coordinates and gene annotation from GREAT
6	ELK1-Dam	C-terminal DamID fusion peaks	peak coordinates and gene annotation from GREAT
7	ELK1	Overlap from N-ter and C-ter DamID fusions	peak coordinates and gene annotation from GREAT
8	Dam-ELK4	N-terminal DamID fusion peaks	peak coordinates and gene annotation from GREAT
9	ELK4-Dam	C-terminal DamID fusion peaks	peak coordinates and gene annotation from GREAT
10	ELK4	Overlap from N-ter and C-ter DamID fusions	peak coordinates and gene annotation from GREAT
11	Dam-SRF	N-terminal DamID fusion peaks	peak coordinates and gene annotation from GREAT
12	SRF-Dam	C-terminal DamID fusion peaks	peak coordinates and gene annotation from GREAT
13	SRF	Overlap from N-ter and C-ter DamID fusions	peak coordinates and gene annotation from GREAT
14	GO Dam-NKX2-5	Over-represented GO terms in Dam-NKX2-5 peaks	Gene Ontology annotation from GREAT
15	GO ELK1/4	Over-represented GO terms in ELK1 and ELK4 peaks	Gene Ontology annotation from GREAT
16	GO SRF	Over-represented GO terms in SRF peaks	Gene Ontology annotation from GREAT
17	GO NKX2-5Y191C off-targets	Over-represented GO terms in Dam-NKX2-5Y191C peaks not bound by Dam-NKX2-5	Gene Ontology annotation from GREAT
18	GO NKX2-5dHD off-targets	Over-represented GO terms in Dam-NKX2-5dHD peaks not bound by Dam-NKX2-5	Gene Ontology annotation from GREAT
19	GO NKX2-5 not ELK not SRF	Over-represented GO terms in NKX2-5 target genes, excluding ELK or SRF targets	Gene Ontology annotation from DAVID
20	GO ELK not NKX2-5 not SRF	Over-represented GO terms in ELK target genes, excluding NKX2-5 or SRF targets	Gene Ontology annotation from DAVID
21	GO SRF not NKX2-5 not ELK	Over-represented GO terms in SRF target genes, excluding NKX2-5 or ELK targets	Gene Ontology annotation from DAVID
22	GO NKX2-5 and ELK not SRF	Over-represented GO terms in NKX2-5 and ELK overlaping target genes, excluding SRF targets	Gene Ontology annotation from DAVID
23	GO NKX2-5 and SRF not ELK	Over-represented GO terms in NKX2-5 and SRF overlaping target genes, excluding ELK targets	Gene Ontology annotation from DAVID
24	GO ELK and SRF not NKX2-5	Over-represented GO terms in ELK and SRF overlaping target genes, excluding NKX2-5 targets	Gene Ontology annotation from DAVID
25	GO NKX2-5 and ELK and SRF	Over-represented GO terms in the overlap between NKX2-5, ELK and SRF target genes	Gene Ontology annotation from DAVID
26	Trawler Dam-NKX2-5	Trawler results for Dam-NKX2-5	Trawler_standalone
27	Trawler Dam-NKX2-5Y191C	Trawler results for Dam-NKX2-5Y191C	Trawler_standalone
28	Trawler Dam-NKX2-5dHD	Trawler results for Dam-NKX2-5dHD	Trawler_standalone
29	Trawler ELK1	Trawler results for ELK1	Trawler_standalone
30	Trawler ELK4	Trawler results for ELK4	Trawler_standalone
31	Trawler SRF	Trawler results for SRF	Trawler_standalone
32	Weeder Dam-NKX2-5	Weeder results for Dam-NKX2-5	Weeder
33	Weeder Dam-NKX2-5Y191C	Weeder results for Dam-NKX2-5Y191C	Weeder
34	Weeder Dam-NKX2-5dHD	Weeder results for Dam-NKX2-5dHD	Weeder
35	Weeder ELK1	Weeder results for ELK1	Weeder
36	Weeder ELK4	Weeder results for ELK4	Weeder
37	Weeder SRF	Weeder results for SRF	Weeder
38	Weeder Dam-NKX2-5Y191C A set	Weeder results for DamNKX2-5 peaks only in Dam-NKX2-5 overlap with Dam-NKX2-5Y191C	Weeder
39	Weeder Dam-NKX2-5Y191C B set	Weeder results for DamNKX2-5 and Dam-NKX2-5dHD peaks in Dam-NKX2-5 overlap with Dam-NKX2-5Y191C	Weeder
40	Weeder Dam-NKX2-5Y191C C set	Weeder results for Dam-NKX2-5dHD peaks only in Dam-NKX2-5 overlap with Dam-NKX2-5Y191C	Weeder
41	Weeder Dam-NKX2-5dHD A set	Weeder results for DamNKX2-5 peaks only in Dam-NKX2-5 overlap with Dam-NKX2-5dHD	Weeder
42	Weeder Dam-NKX2-5dHD B set	Weeder results for DamNKX2-5 and Dam-NKX2-5dHD peaks in Dam-NKX2-5 overlap with Dam-NKX2-5dHD	Weeder
43	Weeder Dam-NKX2-5dHD C set	Weeder results for Dam-NKX2-5dHD peaks only in Dam-NKX2-5 overlap with Dam-NKX2-5dHD	Weeder

## Sheet: 1 - Dam-NKX2-5
peak	chromosome	start	end	gene
Dam-NKX2-5_1	chr13	38241956	38243070	Dsp (-650)
Dam-NKX2-5_2	chr19	10113149	10114159	Fads3 (-2384)
Dam-NKX2-5_3	chr4	119088788	119090872	Zmynd12 (-5459), Ccdc30 (-1704)
Dam-NKX2-5_4	chr19	34826840	34827555	Slc16a12 (-5597)
Dam-NKX2-5_5	chr6	30519812	30520847	Cpa4 (+1954)
Dam-NKX2-5_6	chr2	13478963	13479600	Vim (-16656), Trdmt1 (-12991)
Dam-NKX2-5_7	chr4	125745081	125745480	Lsm10 (-28616), Oscp1 (+9472)
Dam-NKX2-5_8	chr11	98634291	98635127	Nr1d1 (+1847)
Dam-NKX2-5_9	chr5	116899495	116901971	Hspb8 (-27860)
Dam-NKX2-5_10	chr1	9620284	9622037	3110035E14Rik (+29813), Mybl1 (+69129)
Dam-NKX2-5_11	chr5	73791321	73792026	Cwh43 (-5643)
Dam-NKX2-5_12	chr6	17581568	17581966	Capza2 (-5331)
Dam-NKX2-5_13	chr11	6422846	6423602	Myo1g (-2263)
Dam-NKX2-5_14	chr11	98255679	98256651	Pgap3 (+5639), Pnmt (+8219)
Dam-NKX2-5_15	chr11	72951980	72952355	Gsg2 (-372)
Dam-NKX2-5_16	chr12	73185004	73185489	Jkamp (-1863), 2810055F11Rik (+1053)
Dam-NKX2-5_17	chr7	128218018	128219142	Igsf6 (-536)
Dam-NKX2-5_18	chr12	52794863	52795531	Strn3 (-2296)
Dam-NKX2-5_19	chr11	65549415	65550646	Map2k4 (+51768)
Dam-NKX2-5_20	chr12	53980051	53981604	NONE
Dam-NKX2-5_21	chr7	123336212	123338053	NONE
Dam-NKX2-5_22	chr11	58595679	58596868	Olfr314 (-3367)
Dam-NKX2-5_23	chr2	90958001	90959926	Mybpc3 (+663)
Dam-NKX2-5_24	chr6	120937646	120938542	Mical3 (-5349)
Dam-NKX2-5_25	chr1	74047608	74048332	NONE
Dam-NKX2-5_26	chr11	6503592	6504236	Nacad (+2143)
Dam-NKX2-5_27	chr5	144378944	144379694	Cyth3 (-3997)
Dam-NKX2-5_28	chr11	62943486	62944554	Pmp22 (-992)
Dam-NKX2-5_29	chr4	99380229	99381387	Alg6 (-1513)
Dam-NKX2-5_30	chr3	32718727	32719008	Usp13 (+2320)
Dam-NKX2-5_31	chr11	3273388	3274738	Limk2 (+35175), Pik3ip1 (+43329)
Dam-NKX2-5_32	chr4	135698327	135699402	Id3 (-872)
Dam-NKX2-5_33	chr19	29772285	29773285	Mlana (+354)
Dam-NKX2-5_34	chr9	20803611	20804088	Mrpl4 (-3331)
Dam-NKX2-5_35	chr6	38496937	38497822	Luc7l2 (-4064)
Dam-NKX2-5_36	chr3	84389839	84390572	Arfip1 (-3659)
Dam-NKX2-5_37	chr1	134207459	134209334	Nuak2 (-4305)
Dam-NKX2-5_38	chr17	43939631	43941656	Rcan2 (+1844)
Dam-NKX2-5_39	chr5	74592981	74593486	Rasl11b (+1883)
Dam-NKX2-5_40	chr9	37322184	37323050	Esam (-13057), BC024479 (+25711)
Dam-NKX2-5_41	chr9	96919839	96920468	Spsb4 (-1380)
Dam-NKX2-5_42	chr16	34994248	34995131	Ptplb (-27817)
Dam-NKX2-5_43	chr7	117912956	117913896	Ampd3 (-2692)
Dam-NKX2-5_44	chr17	33916936	33917793	Angptl4 (+1155)
Dam-NKX2-5_45	chr19	4940576	4941614	Peli3 (+1997)
Dam-NKX2-5_46	chr17	35841987	35842846	Ddr1 (-3428)
Dam-NKX2-5_47	chr16	98178613	98179587	C2cd2 (-34857), Zfp295 (+4686)
Dam-NKX2-5_48	chr12	106795648	106796476	Bdkrb2 (-5320)
Dam-NKX2-5_49	chr13	93563798	93564459	Thbs4 (+644)
Dam-NKX2-5_50	chr1	173180746	173181044	Ndufs2 (-3652), Adamts4 (+342)
Dam-NKX2-5_51	chr5	139854796	139855540	Gpr146 (-1453)
Dam-NKX2-5_52	chr4	104780416	104781515	Prkaa2 (+1537)
Dam-NKX2-5_53	chr11	6094670	6095029	Nudcd3 (+5604)
Dam-NKX2-5_54	chr1	58086034	58087710	Aox1 (+59)
Dam-NKX2-5_55	chr15	98782187	98782801	Tuba1a (+1438)
Dam-NKX2-5_56	chr9	111336464	111338016	Dclk3 (-4345)
Dam-NKX2-5_57	chr1	155151848	155152509	Lamc1 (+27737)
Dam-NKX2-5_58	chr4	132312186	132313792	Smpdl3b (+97)
Dam-NKX2-5_59	chr8	42220387	42221074	Mtus1 (-1651)
Dam-NKX2-5_60	chr4	102798512	102799361	Mier1 (+6942), Slc35d1 (+88552)
Dam-NKX2-5_61	chr11	97639237	97639991	1700001P01Rik (-2382)
Dam-NKX2-5_62	chr5	150439408	150440318	Hsph1 (-973)
Dam-NKX2-5_63	chr12	25782343	25783382	Id2 (-1906)
Dam-NKX2-5_64	chr17	72129588	72131439	Clip4 (-773)
Dam-NKX2-5_65	chr13	12196458	12198227	Ryr2 (+1869)
Dam-NKX2-5_66	chr3	145884805	145885591	Lpar3 (+1273)
Dam-NKX2-5_67	chr8	109818685	109819648	Nfat5 (+1797)
Dam-NKX2-5_68	chr8	106920124	106920868	Cmtm4 (-900)
Dam-NKX2-5_69	chr1	154470460	154471794	Rgl1 (+1114)
Dam-NKX2-5_70	chr6	113142512	113142933	Lhfpl4 (+2655)
Dam-NKX2-5_71	chr2	118512519	118513503	Pak6 (+10029), Gm1337 (+16688)
Dam-NKX2-5_72	chr9	100933822	100934465	Pccb (+1150)
Dam-NKX2-5_73	chr14	102193811	102195263	Lmo7 (+65392)
Dam-NKX2-5_74	chr14	120724944	120725522	Mbnl2 (+50342)
Dam-NKX2-5_75	chr6	119146220	119147520	Cacna1c (-443)
Dam-NKX2-5_76	chr2	152162742	152163273	Rbck1 (-4633)
Dam-NKX2-5_77	chr11	88717565	88718789	Akap1 (+7723)
Dam-NKX2-5_78	chr9	107830857	107832057	4921517D21Rik (+657)
Dam-NKX2-5_79	chr8	67213747	67214116	Sc4mol (-1557)
Dam-NKX2-5_80	chr8	59310646	59311566	NONE
Dam-NKX2-5_81	chr1	46465353	46465736	NONE
Dam-NKX2-5_82	chr1	43208354	43211838	Fhl2 (+10710), AI597479 (+54541)
Dam-NKX2-5_83	chr2	156023008	156023765	Phf20 (+1004)
Dam-NKX2-5_84	chr9	24579002	24580368	Tbx20 (-939)
Dam-NKX2-5_85	chr13	118389620	118390578	Hcn1 (-1028)
Dam-NKX2-5_86	chr4	46068013	46069489	Tmod1 (+16657), Tstd2 (+82596)
Dam-NKX2-5_87	chr17	66852212	66852905	1110012J17Rik (-53469), Rab12 (+16451)
Dam-NKX2-5_88	chr16	4079029	4080901	Trap1 (-2155)
Dam-NKX2-5_89	chr14	35318357	35318726	Bmpr1a (-2810)
Dam-NKX2-5_90	chr7	119368223	119368776	Mical2 (-850)
Dam-NKX2-5_91	chr7	116761133	116762247	St5 (-1029)
Dam-NKX2-5_92	chr17	49963895	49965605	NONE
Dam-NKX2-5_93	chr2	28794348	28795014	Barhl1 (-22740)
Dam-NKX2-5_94	chr3	117569169	117570417	Snx7 (+2061)
Dam-NKX2-5_95	chr9	90058931	90060544	Adamts7 (+1922)
Dam-NKX2-5_96	chr14	35317018	35318029	Bmpr1a (-1792)
Dam-NKX2-5_97	chr11	68785568	68785961	Rangrf (+1557)
Dam-NKX2-5_98	chr2	73223158	73223844	Gpr155 (+954)
Dam-NKX2-5_99	chr9	45791001	45791760	Pafah1b2 (+1573)
Dam-NKX2-5_100	chr4	57582822	57583590	NONE
Dam-NKX2-5_101	chr19	31836839	31837879	Prkg1 (+2164)
Dam-NKX2-5_102	chr7	119897785	119899143	Tead1 (+75630)
Dam-NKX2-5_103	chr8	130879817	130880686	Nrp1 (-2721)
Dam-NKX2-5_104	chr1	182121118	182123159	Adck3 (+4012)
Dam-NKX2-5_105	chr13	49439114	49439439	Bicd2 (+2359)
Dam-NKX2-5_106	chr11	83285123	83286254	Taf15 (-921)
Dam-NKX2-5_107	chr11	5665343	5665673	Urgcp (-24329), Dbnl (-22978)
Dam-NKX2-5_108	chr6	24551139	24552459	Lmod2 (+4028), Wasl (+63196)
Dam-NKX2-5_109	chr6	118078587	118079411	Csgalnact2 (+10159), Rasgef1a (+62596)
Dam-NKX2-5_110	chr1	79856564	79856902	Serpine2 (-1493)
Dam-NKX2-5_111	chr7	149642540	149643834	Lsp1 (-14561), Tnni2 (+14813)
Dam-NKX2-5_112	chr11	54710835	54711518	Gpx3 (-5178)
Dam-NKX2-5_113	chr4	97446010	97446858	E130114P18Rik (-1695)
Dam-NKX2-5_114	chr15	98436907	98438222	Adcy6 (+499)
Dam-NKX2-5_115	chr19	56463310	56464237	Nrap (+751)
Dam-NKX2-5_116	chr12	41615292	41615731	NONE
Dam-NKX2-5_117	chr2	38144774	38145638	Dennd1a (-2302)
Dam-NKX2-5_118	chr9	44226490	44227214	Ccdc84 (-762)
Dam-NKX2-5_119	chr19	36806423	36807042	Ppp1r3c (+4361)
Dam-NKX2-5_120	chr15	66720068	66721350	Wisp1 (-2246)
Dam-NKX2-5_121	chr2	18914920	18916174	Pip4k2a (+4201)
Dam-NKX2-5_122	chr6	71634434	71635034	Kdm3a (-52054), Reep1 (-23120)
Dam-NKX2-5_123	chr19	36997364	36997844	Fgfbp3 (-3515), Btaf1 (-2965)
Dam-NKX2-5_124	chr1	193195820	193197361	Ppp2r5a (+24329), Tmem206 (+46747)
Dam-NKX2-5_125	chr6	72313133	72313625	Rnf181 (-1004)
Dam-NKX2-5_126	chr9	90165697	90166011	Tbc1d2b (-247)
Dam-NKX2-5_127	chr10	84295999	84297341	Ric8b (-83691), Rfx4 (+77877)
Dam-NKX2-5_128	chr8	37674471	37675820	NONE
Dam-NKX2-5_129	chr18	60765910	60766745	Myoz3 (-14958), Synpo (+23411)
Dam-NKX2-5_130	chr1	43225792	43226648	Fhl2 (-5414)
Dam-NKX2-5_131	chr5	43630336	43631314	Cpeb2 (+6123)
Dam-NKX2-5_132	chr16	36042036	36043401	Wdr5b (+1443)
Dam-NKX2-5_133	chr3	88550618	88551336	Syt11 (+25935), Rit1 (+30201)
Dam-NKX2-5_134	chr3	85354817	85355055	Pet112l (-23115)
Dam-NKX2-5_135	chr2	148703511	148705028	Cst3 (-3066)
Dam-NKX2-5_136	chr17	82079328	82080320	Slc8a1 (+57893)
Dam-NKX2-5_137	chr15	102303185	102303505	Pcbp2 (+2282)
Dam-NKX2-5_138	chr2	19473803	19474782	4921504E06Rik (+1244)
Dam-NKX2-5_139	chr4	132069079	132070152	Sesn2 (-3245)
Dam-NKX2-5_140	chr4	117810566	117811460	St3gal3 (-3518)
Dam-NKX2-5_141	chrX	33652923	33654121	Il13ra1 (+1388)
Dam-NKX2-5_142	chr2	32277649	32279543	Naif1 (-27381), Ptges2 (+27186)
Dam-NKX2-5_143	chr17	14833486	14834463	Thbs2 (-2706)
Dam-NKX2-5_144	chr15	7842009	7842519	Gdnf (+81253)
Dam-NKX2-5_145	chr4	115317825	115318476	Cyp4b1 (+2159)
Dam-NKX2-5_146	chrX	166414833	166415396	NONE
Dam-NKX2-5_147	chr1	140516520	140517034	Nek7 (-504)
Dam-NKX2-5_148	chr2	113876154	113877262	Actc1 (+1839)
Dam-NKX2-5_149	chr11	101524676	101525108	Arl4d (-1963)
Dam-NKX2-5_150	chr11	72695461	72696387	Atp2a3 (-78747), Zzef1 (+86196)
Dam-NKX2-5_151	chr17	78597025	78598346	Crim1 (-1902)
Dam-NKX2-5_152	chr4	149329894	149330962	Spsb1 (-1313)
Dam-NKX2-5_153	chr3	144227460	144228061	Sep15 (-5630), Hs2st1 (+5419)
Dam-NKX2-5_154	chr14	31307598	31308878	Cacna1d (-3896)
Dam-NKX2-5_155	chr7	56502850	56503753	Nav2 (+1743)
Dam-NKX2-5_156	chrX	166417750	166418766	NONE
Dam-NKX2-5_157	chr12	72953234	72953951	Daam1 (+21528)
Dam-NKX2-5_158	chr2	153568407	153569355	Mapre1 (+1858)
Dam-NKX2-5_159	chr16	56076190	56076534	Senp7 (+840)
Dam-NKX2-5_160	chr5	89359183	89360105	Slc4a4 (+43359)
Dam-NKX2-5_161	chrX	154135333	154137222	Smpx (-772)
Dam-NKX2-5_162	chr14	46090545	46091578	Gnpnat1 (-82591), Fermt2 (+58678)
Dam-NKX2-5_163	chr1	66859525	66861309	1110028C15Rik (+3752)
Dam-NKX2-5_164	chr16	91546311	91547052	Ifngr2 (-657)
Dam-NKX2-5_165	chr5	24602589	24602942	Prkag2 (+3694)
Dam-NKX2-5_166	chr1	43221959	43222742	Fhl2 (-1545)
Dam-NKX2-5_167	chr5	23898961	23899705	Atg9b (-1372), Abcb8 (-641)
Dam-NKX2-5_168	chr15	3923291	3923904	Fbxo4 (+5975)
Dam-NKX2-5_169	chr5	138161569	138161961	Agfg2 (-35844), 6430598A04Rik (+19461)
Dam-NKX2-5_170	chr14	22315949	22317323	Myst4 (-2440)
Dam-NKX2-5_171	chr6	115726306	115726709	Cand2 (+1933)
Dam-NKX2-5_172	chr14	61878063	61878556	Sgcg (-983)
Dam-NKX2-5_173	chr7	142887762	142891292	Mki67 (+18535)
Dam-NKX2-5_174	chr15	3946323	3947097	AW549877 (-958)
Dam-NKX2-5_175	chr18	60763280	60764500	Myoz3 (-12520), Synpo (+25849)
Dam-NKX2-5_176	chr17	5115772	5116840	NONE
Dam-NKX2-5_177	chr17	33167978	33168332	Zfp763 (+2171)
Dam-NKX2-5_178	chr6	71635394	71635825	Kdm3a (-52930), Reep1 (-22244)
Dam-NKX2-5_179	chr12	120085884	120086443	Sp8 (+1362)
Dam-NKX2-5_180	chr19	53526701	53527421	Dusp5 (-76747), Smndc1 (-61998)
Dam-NKX2-5_181	chr4	13672676	13673036	Runx1t1 (+2407)
Dam-NKX2-5_182	chr7	30980530	30981684	Capns1 (-1040)
Dam-NKX2-5_183	chr15	78686327	78687230	Lgals2 (-820)
Dam-NKX2-5_184	chr6	14852636	14853558	NONE
Dam-NKX2-5_185	chr17	80459460	80460396	Hnrpll (+1746)
Dam-NKX2-5_186	chr7	108113026	108113464	P2ry6 (-365)
Dam-NKX2-5_187	chr8	46743171	46746192	NONE
Dam-NKX2-5_188	chr2	25053185	25053731	A830007P12Rik (-1125)
Dam-NKX2-5_189	chr17	79452695	79452957	Qpct (+1580)
Dam-NKX2-5_190	chr2	112333940	112334329	Aven (+1014)
Dam-NKX2-5_191	chr15	102503462	102504532	Atp5g2 (-2519)
Dam-NKX2-5_192	chr2	68701697	68702071	Lass6 (+2270)
Dam-NKX2-5_193	chr10	75058533	75059107	Ggt5 (+6694), Susd2 (+47933)
Dam-NKX2-5_194	chr17	33897349	33897847	Rab11b (-167)
Dam-NKX2-5_195	chr7	80691147	80691761	Chd2 (-4822)
Dam-NKX2-5_196	chr15	81635978	81636957	Tef (+3365), Tob2 (+52288)
Dam-NKX2-5_197	chr6	54983791	54984682	Gars (-3758)
Dam-NKX2-5_198	chr8	59792351	59793645	Hand2 (-6782)
Dam-NKX2-5_199	chr15	76093793	76094621	Spatc1 (-4312)
Dam-NKX2-5_200	chr12	76920228	76921791	Syne2 (+1705)
Dam-NKX2-5_201	chr8	80248643	80249459	Ednra (-700)
Dam-NKX2-5_202	chr8	98333964	98334575	Cnot1 (-2904)
Dam-NKX2-5_203	chr9	99143047	99143588	Cep70 (-569)
Dam-NKX2-5_204	chr12	86338333	86338871	Ylpm1 (+1331)
Dam-NKX2-5_205	chr8	108416648	108417151	Nrn1l (-570)
Dam-NKX2-5_206	chr4	132833885	132834453	Tmem222 (-464)
Dam-NKX2-5_207	chr7	54117075	54117330	Ldhc (+570)
Dam-NKX2-5_208	chr6	35274365	35276603	Fam180a (+657)
Dam-NKX2-5_209	chr8	108164273	108164952	Rltpr (-50193), Ctcf (+4175)
Dam-NKX2-5_210	chr1	137697738	137698272	Tnni1 (+2007)
Dam-NKX2-5_211	chr12	99976362	99977168	Ptpn21 (-1150)
Dam-NKX2-5_212	chr11	100802945	100803233	Stat3 (-2264)
Dam-NKX2-5_213	chr19	57270883	57271351	Ablim1 (+19405)
Dam-NKX2-5_214	chr8	23591316	23591997	AI316807 (-4306)
Dam-NKX2-5_215	chr18	42211205	42212013	Sh3rf2 (-1755)
Dam-NKX2-5_216	chr6	134872310	134873170	Cdkn1b (+2321)
Dam-NKX2-5_217	chr4	53410676	53411360	Slc44a1 (-42267)
Dam-NKX2-5_218	chr11	107329585	107330020	Pitpnc1 (+2231)
Dam-NKX2-5_219	chr4	88360892	88361535	Ifnab (-24042), Klhl9 (+7198)
Dam-NKX2-5_220	chr8	130881592	130882437	Nrp1 (-958)
Dam-NKX2-5_221	chr9	50549288	50550436	Dixdc1 (-13773), 2310030G06Rik (+4764)
Dam-NKX2-5_222	chr7	119902741	119903355	Tead1 (+80214)
Dam-NKX2-5_223	chr9	74823116	74823564	BC031353 (-578)
Dam-NKX2-5_224	chr19	37070040	37070328	Btaf1 (+69615)
Dam-NKX2-5_225	chr15	35598672	35599549	NONE
Dam-NKX2-5_226	chr8	15058707	15060125	Myom2 (+1763)
Dam-NKX2-5_227	chr8	122511723	122512336	Crispld2 (-4340)
Dam-NKX2-5_228	chr10	60936300	60937126	Lrrc20 (-1868)
Dam-NKX2-5_229	chr18	20533454	20533899	Dsg1b (-1659)
Dam-NKX2-5_230	chr12	55897706	55898124	Snx6 (-1266)
Dam-NKX2-5_231	chr7	56097382	56098673	Csrp3 (+5393), Zdhhc13 (+53655)
Dam-NKX2-5_232	chr9	22233059	22234489	9530077C05Rik (+17753), rp9 (+39026)
Dam-NKX2-5_233	chr9	7833941	7834466	Birc2 (+1051)
Dam-NKX2-5_234	chr9	24582058	24583070	Tbx20 (-3818)
Dam-NKX2-5_235	chr15	81976480	81977318	Srebf2 (-800)
Dam-NKX2-5_236	chr16	33260316	33261232	Snx4 (+9232)
Dam-NKX2-5_237	chr3	105701943	105702491	Adora3 (-5122)
Dam-NKX2-5_238	chr8	67169344	67170096	Cpe (+2117)
Dam-NKX2-5_239	chr17	66296599	66298088	Ralbp1 (-63081), Twsg1 (+3183)
Dam-NKX2-5_240	chr12	84984150	84984813	Psen1 (-45031), Rbm25 (+11298)
Dam-NKX2-5_241	chr12	70890664	70891072	Cdkl1 (+826)
Dam-NKX2-5_242	chr14	32017477	32018462	Tnnc1 (-3528), Nisch (+2042)
Dam-NKX2-5_243	chr10	116415618	116416233	Rab3ip (-28490), Best3 (-7444)
Dam-NKX2-5_244	chr10	116481312	116482643	Lrrc10 (-419)
Dam-NKX2-5_245	chr19	44406656	44407717	Scd4 (-629)
Dam-NKX2-5_246	chr5	23917540	23918677	Accn3 (-1160)
Dam-NKX2-5_247	chr3	122689675	122690243	Usp53 (-2594)
Dam-NKX2-5_248	chr8	111239780	111240543	Zfhx3 (+1618)
Dam-NKX2-5_249	chr12	87082301	87082603	Mfsd7c (-5037)
Dam-NKX2-5_250	chr6	54761543	54762796	Znrf2 (-4740)
Dam-NKX2-5_251	chr4	132685662	132685993	Wasf2 (-720)
Dam-NKX2-5_252	chr6	83965134	83966115	Dysf (-3758)
Dam-NKX2-5_253	chr17	85355886	85356705	Ppm1b (-1045)
Dam-NKX2-5_254	chr19	45060241	45060683	Sema4g (-3372)
Dam-NKX2-5_255	chr17	5117410	5118078	NONE
Dam-NKX2-5_256	chr12	25670854	25671105	NONE
Dam-NKX2-5_257	chr5	77352583	77353700	Paics (-27294), Aasdh (-18603)
Dam-NKX2-5_258	chr9	54842920	54843647	Chrna5 (+14597), Chrna3 (+31082)
Dam-NKX2-5_259	chr7	132989265	132990324	NONE
Dam-NKX2-5_260	chr6	34267591	34269228	Akr1b3 (-921)
Dam-NKX2-5_261	chr3	122688737	122689282	Usp53 (-1645)
Dam-NKX2-5_262	chr11	8946238	8947205	Gm11992 (-1873), Sun3 (+2272)
Dam-NKX2-5_263	chr14	35314359	35314923	Bmpr1a (+1091)
Dam-NKX2-5_264	chr1	66981703	66984093	Acadl (-73057), Myl1 (+8732)
Dam-NKX2-5_265	chr8	107152849	107153972	Cdh16 (-5250), Rrad (+1810)
Dam-NKX2-5_266	chr6	134778917	134779166	Crebl2 (-1175)
Dam-NKX2-5_267	chr2	178147436	178148100	Sycp2 (-5405), 9030418K01Rik (-1471), Ppp1r3d (+1409)
Dam-NKX2-5_268	chr7	119167817	119169474	Usp47 (+1626)
Dam-NKX2-5_269	chr9	107873796	107874255	Uba7 (-3872)
Dam-NKX2-5_270	chr12	77635666	77636242	Plekhg3 (+1407)
Dam-NKX2-5_271	chr9	44153787	44154231	Hmbs (-1698)
Dam-NKX2-5_272	chr19	46205313	46205636	Elovl3 (-914)
Dam-NKX2-5_273	chr6	91160877	91161856	Fbln2 (-1391)
Dam-NKX2-5_274	chr9	74819220	74819765	BC031353 (-4425)
Dam-NKX2-5_275	chr6	146725312	146726133	Arntl2 (-28329), Stk38l (+52271)
Dam-NKX2-5_276	chr11	79065687	79066426	Wsb1 (+2140)
Dam-NKX2-5_277	chr12	82049597	82050033	Srsf5 (+3324), Slc10a1 (+19251)
Dam-NKX2-5_278	chr1	79666049	79666757	Ap1s3 (+2144)
Dam-NKX2-5_279	chr13	94077470	94078380	Homer1 (+3475)
Dam-NKX2-5_280	chr7	116925968	116926614	Nrip3 (-1232)
Dam-NKX2-5_281	chr4	131983425	131984119	Phactr4 (-5411)
Dam-NKX2-5_282	chr3	51221060	51221422	Naa15 (+1303)
Dam-NKX2-5_283	chr9	73778498	73779148	Unc13c (+2551)
Dam-NKX2-5_284	chr7	75894363	75895063	Arrdc4 (-589)
Dam-NKX2-5_285	chr8	67367347	67367922	Klhl2 (+6081)
Dam-NKX2-5_286	chr1	77059741	77060393	NONE
Dam-NKX2-5_287	chr17	45823656	45824099	Tmem63b (-711), Mrpl14 (+557)
Dam-NKX2-5_288	chr9	42914429	42915407	Arhgef12 (-1117)
Dam-NKX2-5_289	chr19	56791711	56792147	Adrb1 (-4933)
Dam-NKX2-5_290	chr3	146068767	146069287	Ssx2ip (+1376)
Dam-NKX2-5_291	chr2	154483448	154484545	Chmp4b (+1235)
Dam-NKX2-5_292	chr6	57484814	57485996	Ppm1k (+15)
Dam-NKX2-5_293	chr5	73558360	73559125	Fryl (+89114)
Dam-NKX2-5_294	chr1	134209950	134210724	Nuak2 (-2365)
Dam-NKX2-5_295	chr16	21946153	21947078	Tmem41a (+1009)
Dam-NKX2-5_296	chr12	78064350	78064793	Max (-1337)
Dam-NKX2-5_297	chr19	27293218	27293742	Vldlr (+1970)
Dam-NKX2-5_298	chr9	73782413	73782965	Unc13c (-1315)
Dam-NKX2-5_299	chr17	82136861	82138236	Slc8a1 (+168)
Dam-NKX2-5_300	chr5	139857355	139859182	Gpr146 (+1648)
Dam-NKX2-5_301	chr10	128368092	128368955	Itga7 (-2345)
Dam-NKX2-5_302	chr14	65993407	65994388	Zfp395 (+16385), Pnoc (+50148)
Dam-NKX2-5_303	chr17	46279203	46279582	Rsph9 (+1754)
Dam-NKX2-5_304	chr1	74795678	74796574	Prkag3 (-597)
Dam-NKX2-5_305	chr3	57377581	57378514	Wwtr1 (+1784)
Dam-NKX2-5_306	chr1	134437262	134437962	Cntn2 (+1905)
Dam-NKX2-5_307	chr18	42356870	42357158	Plac8l1 (-651)
Dam-NKX2-5_308	chr9	69303340	69304799	Anxa2 (+2580)
Dam-NKX2-5_309	chr5	114829311	114829695	Ube3b (-1113), Kctd10 (+1011)
Dam-NKX2-5_310	chr16	43577961	43579037	Tigit (+85798)
Dam-NKX2-5_311	chr12	25393773	25394386	Rrm2 (+961)
Dam-NKX2-5_312	chr19	4079414	4080683	Cabp2 (-3470)
Dam-NKX2-5_313	chr17	71346811	71348875	Myl12b (-7987), 2900073G15Rik (+4030)
Dam-NKX2-5_314	chr4	131631778	131632534	Epb4.1 (-27163), Oprd1 (+68245)
Dam-NKX2-5_315	chr3	95497410	95497751	Adamtsl4 (-5800)
Dam-NKX2-5_316	chr11	66724357	66725081	Pirt (-774)
Dam-NKX2-5_317	chr12	92503557	92504678	NONE
Dam-NKX2-5_318	chr9	66362758	66363664	Fbxl22 (-811)
Dam-NKX2-5_319	chr7	150235657	150237686	Cd81 (-1983)
Dam-NKX2-5_320	chr16	24394877	24395599	Lpp (-52939)
Dam-NKX2-5_321	chr3	95496634	95497015	Adamtsl4 (-5044)
Dam-NKX2-5_322	chr7	116758175	116759124	St5 (+2011)
Dam-NKX2-5_323	chr6	54941556	54941806	Ggct (+1180)
Dam-NKX2-5_324	chr2	69510058	69510794	Kbtbd10 (+2249)
Dam-NKX2-5_325	chr7	88999311	88999996	Tm6sf1 (-4254)
Dam-NKX2-5_326	chr5	137745436	137746016	Srrt (+3176), Ufsp1 (+9829)
Dam-NKX2-5_327	chr7	133899114	133899507	Mapk3 (-3829)
Dam-NKX2-5_328	chr5	92935175	92935425	Scarb2 (-666)
Dam-NKX2-5_329	chr3	97456162	97456492	Prkab2 (-5808)
Dam-NKX2-5_330	chr9	43894954	43895463	Mfrp (-14644), Usp2 (+17697)
Dam-NKX2-5_331	chr10	67596905	67597933	NONE
Dam-NKX2-5_332	chr5	77375270	77377450	Paics (-4076)
Dam-NKX2-5_333	chr3	121745907	121746793	Abca4 (-1028)
Dam-NKX2-5_334	chr7	150780522	150781068	Nap1l4 (-45800), Cars (+5152)
Dam-NKX2-5_335	chr7	139977816	139978272	Fam53b (+574)
Dam-NKX2-5_336	chr3	121428687	121429049	F3 (+2413)
Dam-NKX2-5_337	chr2	90743661	90744098	Ndufs3 (+998)
Dam-NKX2-5_338	chr5	151995956	151996846	Stard13 (-3633)
Dam-NKX2-5_339	chr2	113879734	113880908	Actc1 (-1774)
Dam-NKX2-5_340	chr7	117762209	117764029	Sbf2 (-4685)
Dam-NKX2-5_341	chr12	46176612	46177169	Stxbp6 (-1421)
Dam-NKX2-5_342	chr3	36379626	36380034	Anxa5 (-5021)
Dam-NKX2-5_343	chr15	99552856	99554285	2310016M24Rik (-2478)
Dam-NKX2-5_344	chr18	36354020	36354588	Nrg2 (+2510)
Dam-NKX2-5_345	chr1	157900647	157901005	Tor1aip1 (-17216)
Dam-NKX2-5_346	chr3	137805360	137805928	Rg9mtd2 (-858)
Dam-NKX2-5_347	chr11	109473632	109474034	Wipi1 (-1130)
Dam-NKX2-5_348	chr1	117996567	117997409	NONE
Dam-NKX2-5_349	chr4	43741790	43742505	Hrct1 (+2078)
Dam-NKX2-5_350	chr6	49316349	49316876	D330028D13Rik (-1125)
Dam-NKX2-5_351	chr6	57483017	57484317	Ppm1k (+1753)
Dam-NKX2-5_352	chr5	5561324	5561647	Gtpbp10 (-1985)
Dam-NKX2-5_353	chr1	74343457	74344253	Tmbim1 (+7055), Pnkd (+12247)
Dam-NKX2-5_354	chr5	121093354	121094107	Rasal1 (-5100)
Dam-NKX2-5_355	chr1	133241940	133242816	Ikbke (-66238)
Dam-NKX2-5_356	chr17	12966786	12967647	Igf2r (-4645)
Dam-NKX2-5_357	chr12	77895811	77896269	Gpx2 (+501)
Dam-NKX2-5_358	chr11	88710328	88711435	Akap1 (+15018)
Dam-NKX2-5_359	chr2	21127901	21128510	Enkur (-1214), Thnsl1 (+855)
Dam-NKX2-5_360	chr9	50561594	50562809	Hspb2 (-1743), Cryab (+1339)
Dam-NKX2-5_361	chr11	96706915	96707202	Copz2 (-4131)
Dam-NKX2-5_362	chr5	65881592	65882248	1110003E01Rik (+2154)
Dam-NKX2-5_363	chr1	170359688	170360532	Pbx1 (+2279)
Dam-NKX2-5_364	chr3	151812142	151812633	Gipc2 (+16476)
Dam-NKX2-5_365	chr14	21650313	21650693	Plau (-5381)
Dam-NKX2-5_366	chr10	12675589	12676011	Utrn (-94267), Stx11 (+8265)
Dam-NKX2-5_367	chr10	13195642	13195936	Phactr2 (-1587)
Dam-NKX2-5_368	chr14	31439867	31440451	Prkcd (-765)
Dam-NKX2-5_369	chr2	75817698	75817988	Ttc30a1 (+2181)
Dam-NKX2-5_370	chr2	76819779	76821669	Ttn (-120)
Dam-NKX2-5_371	chr4	131769497	131769867	Ythdf2 (-1511)
Dam-NKX2-5_372	chr15	3927994	3928306	Fbxo4 (+1423)
Dam-NKX2-5_373	chr10	29079802	29080157	Rnf146 (+2268)
Dam-NKX2-5_374	chr16	16215344	16215884	Pkp2 (+2176)
Dam-NKX2-5_375	chr9	88177390	88178061	Nt5e (-44721)
Dam-NKX2-5_376	chr3	145311317	145312233	Cyr61 (+1174)
Dam-NKX2-5_377	chr2	155652385	155652924	Eif6 (+6)
Dam-NKX2-5_378	chr11	120982809	120983140	Tex19.2 (-2984)
Dam-NKX2-5_379	chr15	100250952	100251383	Slc11a2 (+2318)
Dam-NKX2-5_380	chr18	24871975	24872562	Fhod3 (+4323)
Dam-NKX2-5_381	chr9	59465838	59466865	Parp6 (+1261)
Dam-NKX2-5_382	chr2	181229913	181230359	Tpd52l2 (-1822), Abhd16b (+2225)
Dam-NKX2-5_383	chr10	94784967	94786048	Cradd (+1223)
Dam-NKX2-5_384	chr13	12561862	12562217	Lgals8 (-8035), Edaradd (+50675)
Dam-NKX2-5_385	chr14	58418873	58419378	Gm10094 (+2100)
Dam-NKX2-5_386	chr6	17012678	17013405	Tes (-2107)
Dam-NKX2-5_387	chr13	67585174	67585727	Zfp874b (-262)
Dam-NKX2-5_388	chr15	32176420	32177319	Sema5a (+2302)
Dam-NKX2-5_389	chr1	43240886	43241392	Rpl29 (-4827)
Dam-NKX2-5_390	chr8	79975200	79976049	Arhgap10 (+66181)
Dam-NKX2-5_391	chr13	94078939	94079595	Homer1 (+4817)
Dam-NKX2-5_392	chr3	122690804	122692201	Usp53 (-4138)
Dam-NKX2-5_393	chr13	105017681	105018591	Cenpk (-1332), Ppwd1 (+788)
Dam-NKX2-5_394	chr6	72186256	72186933	Atoh8 (-1024)
Dam-NKX2-5_395	chr1	52770748	52771376	Mfsd6 (+13100), Tmem194b (+83513)
Dam-NKX2-5_396	chr1	136915946	136917833	Ube2t (+57736), Lgr6 (+84963)
Dam-NKX2-5_397	chr11	97558180	97558461	Psmb3 (-6427), Pcgf2 (+2641)
Dam-NKX2-5_398	chr4	81842174	81844805	NONE
Dam-NKX2-5_399	chr11	118150317	118150726	Usp36 (+1036)
Dam-NKX2-5_400	chr15	57712440	57713388	Derl1 (+11059)
Dam-NKX2-5_401	chrX	166419205	166419831	NONE
Dam-NKX2-5_402	chr14	102240668	102241879	NONE
Dam-NKX2-5_403	chr4	134088628	134089238	Fam54b (-266)
Dam-NKX2-5_404	chr19	15985118	15985690	Psat1 (+14111)
Dam-NKX2-5_405	chr5	100403080	100403992	Hnrnpd (+4421)
Dam-NKX2-5_406	chr1	155034940	155035483	Lamc2 (-1635), Lamc2 (-1635)
Dam-NKX2-5_407	chr4	131978577	131978977	Phactr4 (-416)
Dam-NKX2-5_408	chr8	109460778	109461357	Sntb2 (+1418)
Dam-NKX2-5_409	chr7	106505121	106505848	Serpinh1 (-3736)
Dam-NKX2-5_410	chr1	180185132	180186035	Fam36a (-63700), Pppde1 (+68036)
Dam-NKX2-5_411	chr19	7564122	7564485	Atl3 (-4226)
Dam-NKX2-5_412	chr3	30895558	30895881	Prkci (+1027)
Dam-NKX2-5_413	chr4	148848742	148849434	Rbp7 (-20011), Nmnat1 (+10163)
Dam-NKX2-5_414	chr9	110855674	110856492	Lrrc2 (+2034)
Dam-NKX2-5_415	chr6	72363764	72364219	Ggcx (-335)
Dam-NKX2-5_416	chr8	108414944	108415864	Nrn1l (-2066)
Dam-NKX2-5_417	chr3	86804579	86805048	Cd1d1 (-1552)
Dam-NKX2-5_418	chr5	147651236	147651932	Rasl11a (-5063)
Dam-NKX2-5_419	chr2	163518509	163519551	Pkig (+34908), Ada (+56883)
Dam-NKX2-5_420	chr7	29594956	29595493	Hnrnpl (-684)
Dam-NKX2-5_421	chr15	83262476	83264410	Arfgap3 (-82766), Pacsin2 (+31593)
Dam-NKX2-5_422	chr1	155147392	155148439	Lamc1 (+32000)
Dam-NKX2-5_423	chr12	82959510	82960156	Pcnx (-1184)
Dam-NKX2-5_424	chr15	38763248	38764898	Baalc (-1383)
Dam-NKX2-5_425	chr10	24314886	24315306	Ctgf (-152)
Dam-NKX2-5_426	chr14	32617303	32617590	Ankrd28 (+26154)
Dam-NKX2-5_427	chr5	72893128	72894940	Corin (+1413)
Dam-NKX2-5_428	chr10	12685474	12685868	Stx11 (-1606)
Dam-NKX2-5_429	chr18	3509182	3509788	Bambi (+1530)
Dam-NKX2-5_430	chr11	65082363	65084265	Myocd (+177)
Dam-NKX2-5_431	chr1	43590538	43592599	Nck2 (+88973)
Dam-NKX2-5_432	chr5	93237223	93237899	NONE
Dam-NKX2-5_433	chr15	79514946	79517066	Gtpbp1 (-5320), Josd1 (+2296)
Dam-NKX2-5_434	chr7	117914888	117915609	Ampd3 (-869)
Dam-NKX2-5_435	chr13	55202685	55203250	Zfp346 (-3702), Uimc1 (-1312)
Dam-NKX2-5_436	chr13	104969153	104969621	2410002O22Rik (-841), 2410002O22Rik (-841), Trim23 (+468)
Dam-NKX2-5_437	chr4	148036477	148036920	Gm572 (+19273)
Dam-NKX2-5_438	chr4	134089608	134090143	Fam54b (-1209)
Dam-NKX2-5_439	chr16	4727040	4727603	Hmox2 (+961)
Dam-NKX2-5_440	chr4	133958273	133959258	Stmn1 (-65469), Pafah2 (+6491)
Dam-NKX2-5_441	chr5	25002916	25003374	Mll3 (+1456)
Dam-NKX2-5_442	chr3	94846249	94846821	Psmd4 (-68)
Dam-NKX2-5_443	chr3	105674953	105675466	Adora3 (+1434)
Dam-NKX2-5_444	chr4	87453082	87453562	NONE
Dam-NKX2-5_445	chr7	6105066	6106313	Zfp787 (+1883)
Dam-NKX2-5_446	chr11	101527762	101528114	Arl4d (+1083)
Dam-NKX2-5_447	chr6	72182826	72183706	Atoh8 (+2305)
Dam-NKX2-5_448	chr4	140999073	140999519	Zbtb17 (-1292)
Dam-NKX2-5_449	chr10	13216144	13216795	Fuca2 (-4364)
Dam-NKX2-5_450	chr4	43514001	43514738	Car9 (-5528), E130306D19Rik (-1838)
Dam-NKX2-5_451	chr15	11836586	11838110	Npr3 (-1919)
Dam-NKX2-5_452	chr12	113053478	113053845	Xrcc3 (-1610), Zfyve21 (+1181)
Dam-NKX2-5_453	chr19	43598947	43599385	Got1 (-71)
Dam-NKX2-5_454	chr7	150923922	150925637	Tnfrsf23 (-53003), Osbpl5 (+3088)
Dam-NKX2-5_455	chr9	107197937	107198560	Mapkapk3 (-6041), Cish (-771)
Dam-NKX2-5_456	chr7	25290637	25291177	Zfp428 (-1199)
Dam-NKX2-5_457	chr1	120405226	120406505	NONE
Dam-NKX2-5_458	chr6	34549743	34550515	NONE
Dam-NKX2-5_459	chr8	42198577	42200332	Mtus1 (+19625)
Dam-NKX2-5_460	chr5	77378871	77379870	Paics (-1065), Ppat (+1232)
Dam-NKX2-5_461	chr2	118377409	118377797	Bmf (-2189)
Dam-NKX2-5_462	chr9	45648299	45649116	Bace1 (+2096)
Dam-NKX2-5_463	chr5	151096600	151098078	Fry (+34834)
Dam-NKX2-5_464	chr4	53258650	53259304	Abca1 (-86210)
Dam-NKX2-5_465	chr15	84862253	84862809	Fam118a (-4961)
Dam-NKX2-5_466	chr2	77011951	77012918	Ccdc141 (-3743)
Dam-NKX2-5_467	chr11	47191544	47193871	Sgcd (+96)
Dam-NKX2-5_468	chr19	17032060	17032568	Prune2 (+1706)
Dam-NKX2-5_469	chr8	128189727	128190795	4933403G14Rik (-3457)
Dam-NKX2-5_470	chr7	139763272	139763671	Oat (+4609)
Dam-NKX2-5_471	chr10	85765658	85766003	Timp3 (+2674)
Dam-NKX2-5_472	chr2	76766978	76768326	Ttn (-87759), Ttn (+52952)
Dam-NKX2-5_473	chr6	72312228	72312701	Rnf181 (-90)
Dam-NKX2-5_474	chr17	31433870	31434421	Slc37a1 (+1718)
Dam-NKX2-5_475	chr7	117769053	117770779	Adm (-1267)
Dam-NKX2-5_476	chrX	132527039	132527527	2900062L11Rik (-1076)
Dam-NKX2-5_477	chr16	4641432	4642016	Vasn (+1779)
Dam-NKX2-5_478	chr12	106799264	106801116	Bdkrb2 (-1192)
Dam-NKX2-5_479	chr12	88282404	88283901	2310044G17Rik (-5140)
Dam-NKX2-5_480	chr6	47760418	47760682	Pdia4 (+2961)
Dam-NKX2-5_481	chr15	3974650	3976233	Oxct1 (-986)
Dam-NKX2-5_482	chr1	60802694	60803138	Cd28 (-316)
Dam-NKX2-5_483	chr1	77058939	77059270	NONE
Dam-NKX2-5_484	chr1	66908734	66909223	Acadl (+862)
Dam-NKX2-5_485	chr9	106792933	106793773	Rbm15b (-4022), Manf (+916)
Dam-NKX2-5_486	chr11	105071375	105071796	Mrc2 (-82374), Tlk2 (+28742)
Dam-NKX2-5_487	chr2	32310610	32311136	Slc25a25 (-3883)
Dam-NKX2-5_488	chr3	69121896	69122392	Ppm1l (+1304)
Dam-NKX2-5_489	chr14	21617130	21617758	Camk2g (-4134)
Dam-NKX2-5_490	chr5	65827616	65828780	Ugdh (-1117)
Dam-NKX2-5_491	chr3	116265622	116266165	Lrrc39 (+3)
Dam-NKX2-5_492	chr11	5638771	5639321	Urgcp (+2133)
Dam-NKX2-5_493	chr18	8409859	8410403	NONE
Dam-NKX2-5_494	chr5	92761354	92761750	Cxcl9 (-4447), Art3 (+685)
Dam-NKX2-5_495	chr14	22645034	22645278	Vdac2 (-5627)
Dam-NKX2-5_496	chr6	114859016	114859500	Vgll4 (+12512)
Dam-NKX2-5_497	chr4	40798517	40800297	B4galt1 (+1624)
Dam-NKX2-5_498	chr5	31211735	31212334	Emilin1 (-4124), Ost4 (-1940)
Dam-NKX2-5_499	chr2	164280570	164281475	Sys1 (-5448)
Dam-NKX2-5_500	chrX	98616193	98616828	Zmym3 (-950)
Dam-NKX2-5_501	chrX	54026930	54027255	Fhl1 (+41959), Mtap7d3 (+48409)
Dam-NKX2-5_502	chr4	109330459	109330954	Cdkn2c (+7270)
Dam-NKX2-5_503	chr11	78642176	78642517	1810012P15Rik (+2250)
Dam-NKX2-5_504	chr1	9789250	9789713	Sgk3 (+1271)
Dam-NKX2-5_505	chr9	59135400	59137523	Adpgk (-2917)
Dam-NKX2-5_506	chr9	107498597	107499002	BY080835 (+606)
Dam-NKX2-5_507	chr4	149460562	149461040	Gpr157 (-811)
Dam-NKX2-5_508	chr6	5444239	5445406	Pdk4 (+1455)
Dam-NKX2-5_509	chr18	80518072	80518521	Kcng2 (+42696), Pqlc1 (+65252)
Dam-NKX2-5_510	chr3	52847679	52847935	Lhfp (+2338)
Dam-NKX2-5_511	chr10	77067551	77067879	Sumo3 (-1264)
Dam-NKX2-5_512	chr10	78037914	78038427	Ilvbl (+926)
Dam-NKX2-5_513	chr17	29372924	29373848	Cpne5 (+1349)
Dam-NKX2-5_514	chr15	83004445	83004854	Cyb5r3 (-2012)
Dam-NKX2-5_515	chr11	3269238	3269810	Pik3ip1 (+38790), Limk2 (+39714)
Dam-NKX2-5_516	chr6	116365115	116365442	Alox5 (+45917), March8 (+77138)
Dam-NKX2-5_517	chr12	75005851	75006326	Hif1a (-2765)
Dam-NKX2-5_518	chr2	32425180	32425540	Pip5kl1 (-5979), Dpm2 (-1018)
Dam-NKX2-5_519	chr6	135312301	135312800	Emp1 (-398)
Dam-NKX2-5_520	chr14	63860557	63861944	Neil2 (-48889), Gata4 (+2846)
Dam-NKX2-5_521	chr7	56553935	56554763	Nav2 (+52790)
Dam-NKX2-5_522	chr10	87964774	87965170	Chpt1 (+1743)
Dam-NKX2-5_523	chr13	81847961	81848296	Mblac2 (-2287), Polr3g (+1883)
Dam-NKX2-5_524	chr6	108016784	108017240	Setmar (+1972)
Dam-NKX2-5_525	chr12	10399693	10400045	Rdh14 (+2283)
Dam-NKX2-5_526	chr1	193812946	193813833	Rd3 (+12136)
Dam-NKX2-5_527	chr6	13555961	13557546	Tmem168 (+1309)
Dam-NKX2-5_528	chr7	59115882	59116539	Fancf (+1426)
Dam-NKX2-5_529	chrX	8849133	8849572	Xk (-557)
Dam-NKX2-5_530	chr13	34128081	34128603	Bphl (-1168)
Dam-NKX2-5_531	chr4	132926780	132927719	Slc9a1 (+1563)
Dam-NKX2-5_532	chr4	108077644	108078457	Gpx7 (+1267)
Dam-NKX2-5_533	chr4	134051900	134052431	Paqr7 (-727)
Dam-NKX2-5_534	chr1	99657063	99657773	D1Ertd622e (-98823), Ppip5k2 (+9251)
Dam-NKX2-5_535	chr2	120803761	120804283	Tmem62 (+1224)
Dam-NKX2-5_536	chr8	123013960	123015237	Gse1 (+1833)
Dam-NKX2-5_537	chr1	60860000	60860719	Cd28 (+57128)
Dam-NKX2-5_538	chr8	14907894	14908418	Arhgef10 (-3561)
Dam-NKX2-5_539	chr13	46516010	46516302	Rbm24 (+2487)
Dam-NKX2-5_540	chr5	124108881	124110462	Vps33a (-86648), Clip1 (+24628)
Dam-NKX2-5_541	chr15	31465752	31466335	March6 (-5252)
Dam-NKX2-5_542	chr7	119365362	119365736	Mical2 (-3801)
Dam-NKX2-5_543	chr11	66909281	66909764	Myh2 (-75006), Myh3 (+17721)
Dam-NKX2-5_544	chr1	162969162	162969888	Zbtb37 (-5110)
Dam-NKX2-5_545	chr2	90749308	90750225	Ndufs3 (-4889)
Dam-NKX2-5_546	chr15	33525560	33526036	Tspyl5 (+91840)
Dam-NKX2-5_547	chr7	80518865	80519507	Rgma (-1220)
Dam-NKX2-5_548	chr15	27682038	27682325	Fam105a (-70929)
Dam-NKX2-5_549	chr11	69289733	69290520	Kdm6b (-62952), Dnahc2 (+72483)
Dam-NKX2-5_550	chr3	35903297	35903792	Mccc1 (-3945)
Dam-NKX2-5_551	chr12	16900108	16900711	Rock2 (-1374)
Dam-NKX2-5_552	chr19	57390736	57391358	Fam160b1 (-44452)
Dam-NKX2-5_553	chr1	172576464	172577023	Olfml2b (+2081)
Dam-NKX2-5_554	chr4	148544669	148545214	Pgd (-4126)
Dam-NKX2-5_555	chr18	73733943	73734359	Mex3c (+1792)
Dam-NKX2-5_556	chr3	100486860	100487501	Man1a2 (+2215)
Dam-NKX2-5_557	chr1	44273563	44274201	4832428D23Rik (+1894)
Dam-NKX2-5_558	chr16	91378150	91378964	Il10rb (-27923), Ifnar2 (+5529)
Dam-NKX2-5_559	chr10	120197116	120197914	NONE
Dam-NKX2-5_560	chr11	99419212	99419968	Krtap3-2 (-1423)
Dam-NKX2-5_561	chr3	51258266	51258810	Rab33b (-29350), Naa15 (+38600)
Dam-NKX2-5_562	chr17	24388470	24388837	Ccnf (-300)
Dam-NKX2-5_563	chr19	57686809	57687689	Atrnl1 (+1725)
Dam-NKX2-5_564	chr16	90282226	90282626	Scaf4 (+2244)
Dam-NKX2-5_565	chr1	137624670	137625103	Csrp1 (-887)
Dam-NKX2-5_566	chr19	34954269	34955627	Pank1 (-1003)
Dam-NKX2-5_567	chr7	117106945	117107266	Dennd5a (-3170)
Dam-NKX2-5_568	chr5	122959806	122960701	Atp2a2 (-8020)
Dam-NKX2-5_569	chr15	83999043	83999291	Pnpla3 (+921)
Dam-NKX2-5_570	chr3	40825861	40826773	Larp1b (+11307), Pgrmc2 (+60651)
Dam-NKX2-5_571	chr15	84842457	84842835	Upk3a (-4925)
Dam-NKX2-5_572	chr14	30534294	30534645	Cacna2d3 (+580)
Dam-NKX2-5_573	chr2	51004798	51005722	Rnd3 (-629)
Dam-NKX2-5_574	chr11	83280512	83281262	Taf15 (-5723), Mmp28 (-4424)
Dam-NKX2-5_575	chr12	86787356	86787850	Tmed10 (-71936), Fos (-27248)
Dam-NKX2-5_576	chr11	106990825	106991085	Bptf (+2281)
Dam-NKX2-5_577	chr5	93113962	93114575	Shroom3 (+1808)
Dam-NKX2-5_578	chr19	23732069	23732569	1700028P14Rik (-5017)
Dam-NKX2-5_579	chr19	9057776	9058715	Eef1g (+16715)
Dam-NKX2-5_580	chr6	38304522	38305577	Zc3hav1 (-447)
Dam-NKX2-5_581	chr17	26982364	26983142	Nkx2-5 (-4243)
Dam-NKX2-5_582	chrX	160877855	160878482	Asb11 (+2230)
Dam-NKX2-5_583	chr18	39029652	39030113	Gm5820 (-22227)
Dam-NKX2-5_584	chr2	32732949	32733608	Fam129b (+1625)
Dam-NKX2-5_585	chr5	133020609	133021049	NONE
Dam-NKX2-5_586	chr7	104228528	104228948	Gab2 (-1523)
Dam-NKX2-5_587	chr7	118224177	118224544	Eif4g2 (+2183)
Dam-NKX2-5_588	chr3	121672631	121673215	Abca4 (-74455), Arhgap29 (+16679)
Dam-NKX2-5_589	chr10	69026629	69026946	Ank3 (+30332)
Dam-NKX2-5_590	chr10	79483196	79483503	Hmha1 (+3933), Polr2e (+19054)
Dam-NKX2-5_591	chr11	98241086	98241517	Tcap (-3823)
Dam-NKX2-5_592	chr1	93435309	93435733	Asb1 (-1621)
Dam-NKX2-5_593	chrX	45820555	45821254	Elf4 (-4596)
Dam-NKX2-5_594	chr3	103541439	103541883	Olfml3 (+263)
Dam-NKX2-5_595	chr11	117835756	117836475	Socs3 (-5436)
Dam-NKX2-5_596	chr18	46519804	46520207	Ccdc112 (-48424)
Dam-NKX2-5_597	chr7	118129172	118129893	Ctr9 (-42932), Mrvi1 (-39832)
Dam-NKX2-5_598	chr4	116298484	116299233	Nasp (+1697)
Dam-NKX2-5_599	chr11	88920167	88920811	Dgke (+1856)
Dam-NKX2-5_600	chr9	64654891	64655572	Dennd4a (-3586)
Dam-NKX2-5_601	chr10	128025664	128026045	Erbb3 (+702)
Dam-NKX2-5_602	chr11	20444202	20444805	Sertad2 (-87476)
Dam-NKX2-5_603	chr16	91545560	91545929	Ifngr2 (-1594)
Dam-NKX2-5_604	chr6	39508845	39509429	Dennd2a (-1304)
Dam-NKX2-5_605	chr14	41781198	41781792	Tspan14 (-1399)
Dam-NKX2-5_606	chr8	67365672	67366253	Klhl2 (+7753)
Dam-NKX2-5_607	chr17	32527834	32529132	Wiz (-3721)
Dam-NKX2-5_608	chr9	24499343	24499852	Dpy19l2 (+1139)
Dam-NKX2-5_609	chr4	132071379	132071897	Sesn2 (-5267)
Dam-NKX2-5_610	chr11	55284650	55285338	G3bp1 (+1740)
Dam-NKX2-5_611	chr5	35105400	35105806	Htt (+1214)
Dam-NKX2-5_612	chr5	23837911	23838228	Kcnh2 (+19352)
Dam-NKX2-5_613	chr15	76870266	76870744	Apol6 (-5201)
Dam-NKX2-5_614	chr19	23218704	23219517	Klf9 (+3395)
Dam-NKX2-5_615	chr4	86316187	86317216	Plin2 (-739)
Dam-NKX2-5_616	chr4	147375297	147375717	Nppa (+652)
Dam-NKX2-5_617	chr5	124480495	124481061	Vps37b (+1491)
Dam-NKX2-5_618	chr10	12840836	12841411	Plagl1 (+30530), Fam164b (+56705)
Dam-NKX2-5_619	chr2	31544877	31545316	Abl1 (-70368), Exosc2 (+18840)
Dam-NKX2-5_620	chr2	155208246	155209006	Trp53inp2 (+1034)
Dam-NKX2-5_621	chr17	87847917	87848250	Calm2 (-1809)
Dam-NKX2-5_622	chr3	108926528	108926826	Slc25a24 (+610)
Dam-NKX2-5_623	chr9	106182730	106183076	Poc1a (-489)
Dam-NKX2-5_624	chr11	78001366	78001833	Proca1 (-5294), Rpl23a (-4514), Rab34 (-329)
Dam-NKX2-5_625	chr6	9099457	9100527	NONE
Dam-NKX2-5_626	chr11	62459560	62460495	Mmgt2 (-2138), BC046404 (+1997)
Dam-NKX2-5_627	chr11	67051888	67052405	Myh4 (+614)
Dam-NKX2-5_628	chr12	4881243	4881978	Mfsd2b (-446)
Dam-NKX2-5_629	chr4	123589852	123590426	Rragc (-4537)
Dam-NKX2-5_630	chr12	8927234	8928076	Laptm4a (-458)
Dam-NKX2-5_631	chr4	43743591	43744086	Hrct1 (+3769), Olfr159 (+40042)
Dam-NKX2-5_632	chr1	43252853	43253281	Rpl29 (+7101)
Dam-NKX2-5_633	chr19	53331503	53332273	Mxi1 (-53108)
Dam-NKX2-5_634	chr6	34990323	34990802	2010107G12Rik (-62564), Cnot4 (+93174)
Dam-NKX2-5_635	chr4	125779741	125780447	Stk40 (-1107)
Dam-NKX2-5_636	chr11	45694598	45695123	Clint1 (+29395), Lsm11 (+63576)
Dam-NKX2-5_637	chr1	74354506	74354961	Tmbim1 (-3824)
Dam-NKX2-5_638	chr5	73945115	73945443	Dcun1d4 (+72985), Lrrc66 (+78381)
Dam-NKX2-5_639	chr3	96329260	96329763	Hfe2 (+404)
Dam-NKX2-5_640	chr1	52555968	52556366	Nab1 (+1125)
Dam-NKX2-5_641	chr9	44332022	44332593	Cxcr5 (+2215)
Dam-NKX2-5_642	chrX	34530127	34530657	Sept6 (-702)
Dam-NKX2-5_643	chr11	53296901	53297376	Ankrd43 (-3442)
Dam-NKX2-5_644	chr8	80245823	80246112	Ednra (+2383)
Dam-NKX2-5_645	chr5	125871841	125872419	Ubc (-1743)
Dam-NKX2-5_646	chr18	38162975	38163397	Arap3 (-5958)
Dam-NKX2-5_647	chr12	74148412	74149093	Six1 (-1054)
Dam-NKX2-5_648	chr15	81637994	81638447	Tef (+5118), Tob2 (+50535)
Dam-NKX2-5_649	chr19	8903241	8903709	Hnrnpul2 (+9584), Gng3 (+10261)
Dam-NKX2-5_650	chr15	103088112	103088401	Nfe2 (-2410)
Dam-NKX2-5_651	chr10	89086476	89086731	Slc17a8 (-2610)
Dam-NKX2-5_652	chr9	110957702	110958234	Ccrl2 (+1806)
Dam-NKX2-5_653	chr2	77007791	77008195	Ccdc141 (+699)
Dam-NKX2-5_654	chr4	14791916	14792283	Tmem55a (+734)
Dam-NKX2-5_655	chr5	73559533	73559890	Fryl (+88145)
Dam-NKX2-5_656	chr4	53645193	53646775	Fsd1l (+1641)
Dam-NKX2-5_657	chr3	37253478	37253874	Fgf2 (+6101), Nudt6 (+64836)
Dam-NKX2-5_658	chr12	4849761	4850617	Fkbp1b (-1788), BC068281 (+80)
Dam-NKX2-5_659	chr2	35040572	35041375	Rab14 (+15666), Cep110 (+75962)
Dam-NKX2-5_660	chr4	10802922	10803634	NONE
Dam-NKX2-5_661	chr13	63342855	63343188	NONE
Dam-NKX2-5_662	chr11	72256324	72256941	Mybbp1a (+1753)
Dam-NKX2-5_663	chr11	68780220	68781096	Slc25a35 (-975)
Dam-NKX2-5_664	chr7	119896927	119897493	Tead1 (+74376)
Dam-NKX2-5_665	chr13	12290290	12292077	Ryr2 (-91972), Mtr (+59083)
Dam-NKX2-5_666	chr8	129474211	129474703	Tomm20 (-4727)
Dam-NKX2-5_667	chr5	73308007	73308470	Slc10a4 (-89904), Slain2 (+2683)
Dam-NKX2-5_668	chr4	116951558	116953338	Tmem53 (+27854)
Dam-NKX2-5_669	chr4	16092350	16092669	Ripk2 (-1865)
Dam-NKX2-5_670	chr14	56143240	56143562	Nrl (+401)
Dam-NKX2-5_671	chr6	56744752	56745745	Kbtbd2 (+2558), Avl9 (+80350)
Dam-NKX2-5_672	chr11	115261276	115261664	Ict1 (-3610)
Dam-NKX2-5_673	chr15	32273352	32273785	Sema5a (+99001)
Dam-NKX2-5_674	chr11	72438862	72439269	Ankfy1 (-64438), Ube2g1 (+18303)
Dam-NKX2-5_675	chr5	77354189	77354634	Paics (-26024), Aasdh (-19873)
Dam-NKX2-5_676	chr6	9097292	9098277	NONE
Dam-NKX2-5_677	chr15	58241581	58242322	D15Ertd621e (-5071)
Dam-NKX2-5_678	chr7	17153687	17154073	Npas1 (-91751), Grlf1 (+46462)
Dam-NKX2-5_679	chr3	121349997	121350575	F3 (-76169)
Dam-NKX2-5_680	chr2	26998984	26999418	Fam163b (-1204)
Dam-NKX2-5_681	chr17	89026678	89027315	Ston1 (+1102)
Dam-NKX2-5_682	chr8	28372424	28373205	Eif4ebp1 (+2016)
Dam-NKX2-5_683	chr8	46972984	46973311	Pdlim3 (+2309)
Dam-NKX2-5_684	chr3	32717908	32718293	Usp13 (+1553)
Dam-NKX2-5_685	chr10	17516380	17517750	Txlnb (+1040)
Dam-NKX2-5_686	chr13	104711843	104712457	Erbb2ip (-1556)
Dam-NKX2-5_687	chr6	24550051	24550334	Lmod2 (+2422)
Dam-NKX2-5_688	chr1	194012492	194012738	Kcnh1 (-2139)
Dam-NKX2-5_689	chr7	88256290	88256940	Slc28a1 (-3070)
Dam-NKX2-5_690	chr12	55961328	55962143	Cfl2 (+2128)
Dam-NKX2-5_691	chr1	137733541	137734021	Tnnt2 (+818)
Dam-NKX2-5_692	chr11	97638661	97638845	1700001P01Rik (-1521)
Dam-NKX2-5_693	chr17	26854196	26854527	A930001N09Rik (+1767)
Dam-NKX2-5_694	chr15	79154017	79154396	Baiap2l2 (-38268), Pla2g6 (+4594)
Dam-NKX2-5_695	chr11	69175990	69176490	Chd3 (-16854), Chd3 (+6688)
Dam-NKX2-5_696	chr4	118889840	118890994	4930538K18Rik (+405)
Dam-NKX2-5_697	chr18	23964621	23965024	Mapre2 (+52597)
Dam-NKX2-5_698	chr12	81572692	81573114	Galntl1 (-47074), Exd2 (+8821)
Dam-NKX2-5_699	chr12	112650089	112650533	1200009I06Rik (-5330)
Dam-NKX2-5_700	chr4	131864447	131864745	Rab42-ps (-5325)
Dam-NKX2-5_701	chrX	92673637	92674225	Asb12 (-463)
Dam-NKX2-5_702	chr5	122827118	122827449	1500011H22Rik (-5312), Gpn3 (+4767)
Dam-NKX2-5_703	chr14	31363561	31364859	Tkt (+1875)
Dam-NKX2-5_704	chr1	75394576	75395082	Gmppa (-37689), Speg (+22957)
Dam-NKX2-5_705	chr16	17235304	17235777	Hic2 (+1861)
Dam-NKX2-5_706	chr7	53370483	53372504	Kcnj11 (-15887), Abcc8 (+63909)
Dam-NKX2-5_707	chr18	20712034	20712601	Dsg2 (-4299)
Dam-NKX2-5_708	chr7	56103791	56104141	Csrp3 (-545)
Dam-NKX2-5_709	chr19	23762690	23763104	Ptar1 (+1007)
Dam-NKX2-5_710	chr7	128846228	128846820	Usp31 (+4243)
Dam-NKX2-5_711	chr19	40528860	40529818	Sorbs1 (+58963)
Dam-NKX2-5_712	chr4	129379689	129380058	Tmem39b (-5792)
Dam-NKX2-5_713	chr7	89077789	89078227	Hdgfrp3 (+1337)
Dam-NKX2-5_714	chr12	55757925	55758239	1110002B05Rik (-523)
Dam-NKX2-5_715	chr6	8458206	8458821	Glcci1 (-1082)
Dam-NKX2-5_716	chr16	34991551	34991896	Ptplb (-30783)
Dam-NKX2-5_717	chr7	108258718	108259752	Fchsd2 (+1946)
Dam-NKX2-5_718	chr16	17132713	17133326	Sdf2l1 (-544)
Dam-NKX2-5_719	chr11	45870354	45871762	Adam19 (+1569)
Dam-NKX2-5_720	chr4	135700287	135701301	Id3 (+1057)
Dam-NKX2-5_721	chr7	146569709	146570043	Inpp5a (-5132)
Dam-NKX2-5_722	chr4	119093250	119093854	Ccdc30 (-5426), Zmynd12 (-1737), Ppcs (+1473)
Dam-NKX2-5_723	chr17	35835515	35836291	Gtf2h4 (-25276), Ddr1 (+3086)
Dam-NKX2-5_724	chr7	117263731	117264070	Wee1 (-1672)
Dam-NKX2-5_725	chr3	145314478	145315702	Cyr61 (-2141)
Dam-NKX2-5_726	chr7	135666047	135666546	Bag3 (-800)
Dam-NKX2-5_727	chr3	19853247	19854914	Cp (-2973)
Dam-NKX2-5_728	chrX	103122869	103123314	Atrx (+1619)
Dam-NKX2-5_729	chr10	87325370	87325799	Igf1 (+3784)
Dam-NKX2-5_730	chr3	126298587	126299123	Camk2d (-1036)
Dam-NKX2-5_731	chr1	99992891	99993598	Pam (-1036)
Dam-NKX2-5_732	chr19	27285616	27285978	Vldlr (-5713)
Dam-NKX2-5_733	chr4	147222350	147222931	Zfp933 (-157)
Dam-NKX2-5_734	chr7	81698164	81698562	Slco3a1 (+1303)
Dam-NKX2-5_735	chr14	32251178	32251657	Sh3bp5 (-2199)
Dam-NKX2-5_736	chr11	72228751	72229138	Smtnl2 (-3730)
Dam-NKX2-5_737	chrX	154035430	154035793	Mbtps2 (+1035)
Dam-NKX2-5_738	chr5	130354653	130355105	Phkg1 (+75)
Dam-NKX2-5_739	chr8	108535644	108536335	Ddx28 (-604), Dus2l (+583)
Dam-NKX2-5_740	chr19	15998943	15999419	Psat1 (+334)
Dam-NKX2-5_741	chr11	102992992	102993384	Hexim2 (-1465)
Dam-NKX2-5_742	chr11	117690045	117690926	Tk1 (-3158)
Dam-NKX2-5_743	chr3	57760926	57761817	NONE
Dam-NKX2-5_744	chr11	60743917	60744414	Map2k3 (-1393)
Dam-NKX2-5_745	chr7	108983922	108984269	Inppl1 (+2242)
Dam-NKX2-5_746	chr12	70998241	70998881	Map4k5 (-4411)
Dam-NKX2-5_747	chr7	56096565	56096841	Csrp3 (+6718), Zdhhc13 (+52330)
Dam-NKX2-5_748	chr11	116976974	116977271	Sec14l1 (+637)
Dam-NKX2-5_749	chr4	151384858	151385764	Klhl21 (+2311)
Dam-NKX2-5_750	chr18	43063777	43064279	Ppp2r2b (-5385)
Dam-NKX2-5_751	chr12	86696156	86696457	Nek9 (-15995), Tmed10 (+19360)
Dam-NKX2-5_752	chr7	150281987	150282412	Trpm5 (-1653)
Dam-NKX2-5_753	chr12	100041482	100041782	Zc3h14 (+56454), Eml5 (+98062)
Dam-NKX2-5_754	chr11	43648084	43648852	Adra1b (+1366)
Dam-NKX2-5_755	chr10	128004631	128005093	Pa2g4 (-1872)
Dam-NKX2-5_756	chr11	40567282	40568390	Ccng1 (+952)
Dam-NKX2-5_757	chr3	27053534	27054326	Ect2 (-1154)
Dam-NKX2-5_758	chr6	35125822	35126256	Nup205 (-1577)
Dam-NKX2-5_759	chr18	40412304	40412661	Kctd16 (-5532)
Dam-NKX2-5_760	chr3	53529492	53530101	Frem2 (-68520)
Dam-NKX2-5_761	chr1	62709271	62709896	Nrp2 (-40307)
Dam-NKX2-5_762	chr19	57272852	57273609	Ablim1 (+17291)
Dam-NKX2-5_763	chr4	120079276	120079706	Scmh1 (+1605)
Dam-NKX2-5_764	chr5	108066405	108066724	Rpap2 (+39829), Gfi1 (+86798)
Dam-NKX2-5_765	chr9	24576189	24577652	Tbx20 (+1825)
Dam-NKX2-5_766	chr14	47990526	47991472	Lgals3 (-2536)
Dam-NKX2-5_767	chr13	33054212	33054957	Serpinb6b (-2797)
Dam-NKX2-5_768	chr19	9972837	9973506	Incenp (+851)
Dam-NKX2-5_769	chr6	38072887	38073830	Atp6v0a4 (+1227)
Dam-NKX2-5_770	chr5	144381576	144382306	Cyth3 (-1375)
Dam-NKX2-5_771	chr3	137794662	137795008	Mttp (-494)
Dam-NKX2-5_772	chr3	121347049	121347384	F3 (-79238)
Dam-NKX2-5_773	chr5	51942572	51943622	Ppargc1a (+2063)
Dam-NKX2-5_774	chr10	127527738	127528132	Baz2a (-1581)
Dam-NKX2-5_775	chr14	57653481	57654229	Gja3 (+22927)
Dam-NKX2-5_776	chr7	116689916	116690620	Rpl27a (+27559), St5 (+70393)
Dam-NKX2-5_777	chr15	98862422	98863259	Prph (-22764), Tuba1c (+2519)
Dam-NKX2-5_778	chr6	72564666	72565163	Tgoln2 (+2079)
Dam-NKX2-5_779	chr5	89362415	89362961	Slc4a4 (+46403)
Dam-NKX2-5_780	chr4	150448579	150448894	Vamp3 (-16675)
Dam-NKX2-5_781	chr11	65546611	65547024	Map2k4 (+54981)
Dam-NKX2-5_782	chr4	53455055	53455427	Slc44a1 (+1956)
Dam-NKX2-5_783	chr6	71830097	71830611	Ptcd3 (+28402), Immt (+49029)
Dam-NKX2-5_784	chr1	108609424	108610062	Bcl2 (+1124)
Dam-NKX2-5_785	chr7	117128883	117129940	Tmem41b (+347)
Dam-NKX2-5_786	chr16	94746401	94747060	Dscr3 (+1505)
Dam-NKX2-5_787	chr7	19750763	19751158	Gipr (+515)
Dam-NKX2-5_788	chr9	118747992	118748305	Ctdspl (-87505)
Dam-NKX2-5_789	chr10	116385782	116386487	Rab3ip (+1301)
Dam-NKX2-5_790	chr1	134392288	134392668	Tmem81 (-10329), Rbbp5 (+18534)
Dam-NKX2-5_791	chr11	121004116	121004871	Tex19.1 (-2963)
Dam-NKX2-5_792	chr5	120255796	120257189	Tbx5 (-28179)
Dam-NKX2-5_793	chr5	92760075	92760599	Cxcl9 (-3232), Art3 (-530)
Dam-NKX2-5_794	chr19	41666409	41666957	AI606181 (-1170)
Dam-NKX2-5_795	chr15	77673583	77674104	Myh9 (-1299)
Dam-NKX2-5_796	chr1	195000169	195000418	Irf6 (+20988), Traf3ip3 (+27446)
Dam-NKX2-5_797	chr12	85626995	85627374	Ptgr2 (+921)
Dam-NKX2-5_798	chr9	108501143	108501971	P4htm (-1626)
Dam-NKX2-5_799	chr15	79662771	79663271	Npcd (+1742)
Dam-NKX2-5_800	chr11	86169694	86170232	Med13 (+1064)
Dam-NKX2-5_801	chr6	32542632	32543136	Plxna4 (-4692)
Dam-NKX2-5_802	chr6	38498200	38498759	Luc7l2 (-2964)
Dam-NKX2-5_803	chr11	30173044	30173424	Spnb2 (-53462)
Dam-NKX2-5_804	chr15	38429853	38430109	Azin1 (+19040)
Dam-NKX2-5_805	chr18	55150361	55150841	Zfp608 (-767)
Dam-NKX2-5_806	chr3	127485897	127486252	Alpk1 (-2630)
Dam-NKX2-5_807	chr6	13626628	13627072	B630005N14Rik (+1116)
Dam-NKX2-5_808	chr6	36471239	36472017	Chrm2 (-1542)
Dam-NKX2-5_809	chr2	157966433	157966821	Tgm2 (+5501)
Dam-NKX2-5_810	chr1	134213644	134214136	Nuak2 (+1188)
Dam-NKX2-5_811	chr12	16896457	16897167	Rock2 (-4972)
Dam-NKX2-5_812	chr13	9277187	9277655	Dip2c (+1650)
Dam-NKX2-5_813	chr9	108471341	108471825	Ndufaf3 (-1910), Dalrd3 (-640)
Dam-NKX2-5_814	chr14	17406498	17407395	Rarb (+777)
Dam-NKX2-5_815	chr2	90908903	90909478	Slc39a13 (+1187)
Dam-NKX2-5_816	chr15	38446613	38447812	Azin1 (+1808)
Dam-NKX2-5_817	chr2	84548407	84548773	Zdhhc5 (+6731), Med19 (+30031)
Dam-NKX2-5_818	chr4	97440499	97442377	E130114P18Rik (+3301)
Dam-NKX2-5_819	chr19	9062150	9062490	Eef1g (+20789)
Dam-NKX2-5_820	chr3	54917516	54917869	Spg20 (+1663)
Dam-NKX2-5_821	chr6	24616042	24616325	Wasl (-1189)
Dam-NKX2-5_822	chr11	109510284	109510627	Prkar1a (-1807)
Dam-NKX2-5_823	chr10	62922224	62922592	Ctnna3 (+29562)
Dam-NKX2-5_824	chr6	38792780	38793174	Hipk2 (+33212)
Dam-NKX2-5_825	chr13	59648360	59649643	Agtpbp1 (+9678)
Dam-NKX2-5_826	chr16	20496118	20496618	Eif2b5 (-2522)
Dam-NKX2-5_827	chr11	115164726	115165177	Fads6 (-6092), Otop2 (-3525)
Dam-NKX2-5_828	chr6	29414031	29414405	Atp6v1f (-3565)
Dam-NKX2-5_829	chr11	6342703	6343398	H2afv (+1395)
Dam-NKX2-5_830	chr11	60623561	60624375	Shmt1 (+799)
Dam-NKX2-5_831	chr10	107600423	107600990	Ppp1r12a (+1251)
Dam-NKX2-5_832	chr3	38381894	38382370	Ankrd50 (+1606)
Dam-NKX2-5_833	chr4	89356028	89356376	Dmrta1 (+1313)
Dam-NKX2-5_834	chr12	16766625	16767195	Greb1 (+40782)
Dam-NKX2-5_835	chr3	122124346	122124732	Bcar3 (+1841)
Dam-NKX2-5_836	chr10	66688010	66688303	Nrbf2 (+59872), Jmjd1c (+98151)
Dam-NKX2-5_837	chr5	75077755	75078073	Lnx1 (+21014)
Dam-NKX2-5_838	chr7	142887018	142887403	Mki67 (+20851)
Dam-NKX2-5_839	chr12	8928331	8928653	Laptm4a (+379)
Dam-NKX2-5_840	chr12	8676070	8677095	Pum2 (-4482)
Dam-NKX2-5_841	chr19	4627120	4627475	Rce1 (-1681)
Dam-NKX2-5_842	chr5	76372588	76373020	Kdr (+1649)
Dam-NKX2-5_843	chr4	43685417	43685887	4930412F15Rik (-3921), Tmem8b (+3809)
Dam-NKX2-5_844	chr6	146795677	146796195	1700023A16Rik (-2696)
Dam-NKX2-5_845	chr19	45122431	45122881	Pdzd7 (-2394), Sfxn3 (+590)
Dam-NKX2-5_846	chr6	54543011	54543682	Plekha8 (-1758), Fkbp14 (-225)
Dam-NKX2-5_847	chr12	83715304	83715729	Rgs6 (-2508)
Dam-NKX2-5_848	chr9	94436617	94436966	1190002N15Rik (+1708)
Dam-NKX2-5_849	chr4	115814717	115815205	1520402A15Rik (+2260)
Dam-NKX2-5_850	chr2	72124986	72125478	B230120H23Rik (+1538)
Dam-NKX2-5_851	chr16	13353190	13353449	Mkl2 (+96746)
Dam-NKX2-5_852	chr11	47190330	47190771	Sgcd (+2253)
Dam-NKX2-5_853	chr12	3234236	3234841	Rab10 (+75430)
Dam-NKX2-5_854	chr4	41202760	41204409	Ubap2 (+18583)
Dam-NKX2-5_855	chr1	162966066	162967022	Zbtb37 (-2129)
Dam-NKX2-5_856	chr4	19496208	19496555	Fam82b (-5832), Cpne3 (+869)
Dam-NKX2-5_857	chr13	36081157	36081804	Ppp1r3g (+21706)
Dam-NKX2-5_858	chr11	106934456	106934742	Kpna2 (-73760), Bptf (+58637)
Dam-NKX2-5_859	chr17	13998985	13999316	Gm7168 (-86229)
Dam-NKX2-5_860	chr11	95697998	95698346	Gngt2 (-5437)
Dam-NKX2-5_861	chr13	102464828	102465392	Pik3r1 (+73062)
Dam-NKX2-5_862	chr9	92170978	92171785	Plscr2 (+942)
Dam-NKX2-5_863	chr12	86692486	86692989	Nek9 (-12426), Tmed10 (+22929)
Dam-NKX2-5_864	chr12	72412724	72413083	Dact1 (+2033)
Dam-NKX2-5_865	chr5	91320611	91320869	Cxcl1 (+469)
Dam-NKX2-5_866	chr15	37391428	37392143	NONE
Dam-NKX2-5_867	chr3	137575841	137576210	Mapksp1 (-5493)
Dam-NKX2-5_868	chr6	119127026	119127785	Dcp1b (+2135)
Dam-NKX2-5_869	chr13	46057394	46057947	Atxn1 (+2674)
Dam-NKX2-5_870	chr6	121061127	121061719	Pex26 (-72262), Mical3 (-29796)
Dam-NKX2-5_871	chr13	103483651	103484624	Cd180 (+500)
Dam-NKX2-5_872	chr17	35957732	35958262	Flot1 (-2305), Ier3 (-661)
Dam-NKX2-5_873	chr1	39632415	39632769	Rnf149 (+1600)
Dam-NKX2-5_874	chr8	123156276	123157370	1190005I06Rik (+1459)
Dam-NKX2-5_875	chr17	35222235	35222716	Abhd16a (-3760), Ly6g6f (+64)
Dam-NKX2-5_876	chr16	30059206	30060335	Hes1 (-5672)
Dam-NKX2-5_877	chr11	59425410	59425844	Olfr225 (-841)
Dam-NKX2-5_878	chrX	148435595	148436044	Hsd17b10 (-619)
Dam-NKX2-5_879	chr7	123173987	123174276	1110004F10Rik (-62762), Sox6 (-35532)
Dam-NKX2-5_880	chr5	110710436	110710901	Pole (-4669), Pxmp2 (+4518)
Dam-NKX2-5_881	chr8	25549680	25550037	1810011O10Rik (-441)
Dam-NKX2-5_882	chr9	69889921	69890439	Gcnt3 (-4285)
Dam-NKX2-5_883	chr13	102535898	102536592	Pik3r1 (+1927)
Dam-NKX2-5_884	chr12	53977900	53978419	NONE
Dam-NKX2-5_885	chr4	132325364	132325642	Rpa2 (+1228)
Dam-NKX2-5_886	chr4	155334964	155335654	Fam132a (-1118)
Dam-NKX2-5_887	chr11	103559242	103559563	Gosr2 (-379)
Dam-NKX2-5_888	chr7	108495734	108496022	Arap1 (-705)
Dam-NKX2-5_889	chr3	105508902	105509191	6530418L21Rik (+1530)
Dam-NKX2-5_890	chr19	44012764	44013463	Dnmbp (-26232), Cpn1 (+47896)
Dam-NKX2-5_891	chr17	49963131	49963648	NONE
Dam-NKX2-5_892	chr3	151854710	151855325	Dnajb4 (+1789)
Dam-NKX2-5_893	chr7	118093455	118094438	Mrvi1 (-4246)
Dam-NKX2-5_894	chr12	53977112	53977468	NONE
Dam-NKX2-5_895	chr5	143669873	143670384	Actb (-1726)
Dam-NKX2-5_896	chr4	9569675	9570355	Asph (+26294)
Dam-NKX2-5_897	chr2	142726235	142726665	Kif16b (+750)
Dam-NKX2-5_898	chr7	130269501	130269934	Tnrc6a (+2319)
Dam-NKX2-5_899	chr12	88286959	88287247	2310044G17Rik (-1190)
Dam-NKX2-5_900	chr6	22196948	22197421	Wnt16 (-41042)
Dam-NKX2-5_901	chr18	43551384	43551802	Dpysl3 (+1392)
Dam-NKX2-5_902	chr1	24684859	24685159	Lmbrd1 (-374)
Dam-NKX2-5_903	chr11	68911201	68912130	Per1 (-1994)
Dam-NKX2-5_904	chr8	97604818	97605081	Katnb1 (-151)
Dam-NKX2-5_905	chr18	84258622	84259355	Tshz1 (-3035), Zadh2 (+1439)
Dam-NKX2-5_906	chr6	146726511	146726841	Arntl2 (-27376), Stk38l (+53224)
Dam-NKX2-5_907	chr8	126040501	126040832	Gas8 (-2068), Dbndd1 (-1312)
Dam-NKX2-5_908	chr7	96485409	96485704	Tmem135 (+1740)
Dam-NKX2-5_909	chr15	76525245	76525683	Gpt (-1730)
Dam-NKX2-5_910	chr10	41241045	41241296	Cd164 (+1865)
Dam-NKX2-5_911	chr7	86419025	86419979	Abhd2 (+1350)
Dam-NKX2-5_912	chr17	26848265	26848651	A930001N09Rik (-4137)
Dam-NKX2-5_913	chr7	149645019	149645822	Lsp1 (-12327), Tnni2 (+17047)
Dam-NKX2-5_914	chr8	75875703	75876176	Large (+515)
Dam-NKX2-5_915	chr11	52176541	52176805	Vdac1 (+2056)
Dam-NKX2-5_916	chr11	30169175	30169588	Spnb2 (-49610)
Dam-NKX2-5_917	chr7	96660257	96660554	Prss23 (+5690)
Dam-NKX2-5_918	chr16	11315493	11316212	Tnfrsf17 (+1951)
Dam-NKX2-5_919	chr18	42214143	42215059	Sh3rf2 (+1237)
Dam-NKX2-5_920	chr12	88071256	88072656	Angel1 (-4546), Gm6772 (-3363)
Dam-NKX2-5_921	chr15	41701167	41701545	Abra (-90)
Dam-NKX2-5_922	chr1	136914017	136914442	Ube2t (+55076), Lgr6 (+87623)
Dam-NKX2-5_923	chr7	96670223	96670465	Prss23 (-4248)
Dam-NKX2-5_924	chr2	116948349	116948810	Spred1 (+1394)
Dam-NKX2-5_925	chr14	55238890	55239320	Psmb11 (-5042), Psmb5 (-2273)
Dam-NKX2-5_926	chr2	72466305	72466664	NONE
Dam-NKX2-5_927	chr1	77060746	77061091	NONE
Dam-NKX2-5_928	chr14	73788965	73789251	Itm2b (-4030)
Dam-NKX2-5_929	chr5	106128054	106128468	Lrrc8d (-1568)
Dam-NKX2-5_930	chr16	22168778	22169033	Igf2bp2 (-5534)
Dam-NKX2-5_931	chr13	33055708	33056265	Serpinb6b (-1395)
Dam-NKX2-5_932	chr9	30744099	30744602	Adamts8 (-5797)
Dam-NKX2-5_933	chr14	67625608	67626093	Bnip3l (+1863)
Dam-NKX2-5_934	chr11	96691887	96692632	Nfe2l1 (-978)
Dam-NKX2-5_935	chr1	55105652	55105956	Coq10b (-3810)
Dam-NKX2-5_936	chr4	88784138	88785051	Mtap (+1321)
Dam-NKX2-5_937	chr7	146098686	146099130	Bnip3 (+2281)
Dam-NKX2-5_938	chr1	181477131	181477550	Tfb2m (-943), Cnst (+681)
Dam-NKX2-5_939	chr6	86800809	86801450	Aak1 (+1619)
Dam-NKX2-5_940	chr4	122929591	122929842	Pabpc4 (-30437), Heyl (+18918)
Dam-NKX2-5_941	chr15	83297674	83298588	Pacsin2 (-3095)
Dam-NKX2-5_942	chr3	19855365	19856347	Cp (-1198)
Dam-NKX2-5_943	chr3	151926748	151927138	Nexn (+2341)
Dam-NKX2-5_944	chr11	76758164	76758752	Blmh (-700)
Dam-NKX2-5_945	chr2	153459150	153459525	Commd7 (-821)
Dam-NKX2-5_946	chr4	115749652	115750046	Uqcrh (-2174), Lrrc41 (+1779)
Dam-NKX2-5_947	chr2	20893202	20893589	Arhgap21 (-4048)
Dam-NKX2-5_948	chr7	127041409	127042045	Dcun1d3 (-2755), Lyrm1 (+1921)
Dam-NKX2-5_949	chr3	88297784	88298361	Sema4a (-32969), Lmna (+9181)
Dam-NKX2-5_950	chr3	97470601	97471214	Prkab2 (+8773)
Dam-NKX2-5_951	chr14	102127855	102128136	Lmo7 (-1149)
Dam-NKX2-5_952	chr7	120905519	120905774	Spon1 (-3865)
Dam-NKX2-5_953	chr8	109725657	109726504	Nfat5 (-91289), Cyb5b (+51520)
Dam-NKX2-5_954	chr1	137155298	137155594	Elf3 (-397)
Dam-NKX2-5_955	chr4	55018337	55019025	Zfp462 (+57864)
Dam-NKX2-5_956	chr18	20710347	20711634	Dsg2 (-5626)
Dam-NKX2-5_957	chr15	74564642	74565033	Slurp1 (-6382), Lypd2 (-95)
Dam-NKX2-5_958	chr17	73184289	73184993	Ypel5 (-1403)
Dam-NKX2-5_959	chr3	96656210	96656607	Pdzk1 (+22421), Gpr89 (+52812)
Dam-NKX2-5_960	chr7	139766138	139766603	Oat (+1710)
Dam-NKX2-5_961	chr14	32247233	32247961	Sh3bp5 (+1622)
Dam-NKX2-5_962	chr4	43723138	43723893	Olfr71 (-4078)
Dam-NKX2-5_963	chr7	54098097	54098384	Ldha (-4211)
Dam-NKX2-5_964	chr14	32008118	32008662	Stab1 (-26563), Nisch (+11622)
Dam-NKX2-5_965	chr8	64380901	64381538	Palld (+267)
Dam-NKX2-5_966	chr8	26827936	26828264	Ppapdc1b (-2420)
Dam-NKX2-5_967	chr4	140935740	140935998	Fam131c (+11734), Clcnka (+18145)
Dam-NKX2-5_968	chr15	27505184	27506008	Fam105b (+54852)
Dam-NKX2-5_969	chr15	58257609	58258021	D15Ertd621e (+10792)
Dam-NKX2-5_970	chr6	17256533	17257144	Cav1 (+469)
Dam-NKX2-5_971	chr5	44167951	44168497	Fbxl5 (+5164)
Dam-NKX2-5_972	chr14	45937087	45937598	Ero1l (+904)
Dam-NKX2-5_973	chr5	20877853	20878341	Fgl2 (-394)
Dam-NKX2-5_974	chr11	62946873	62947167	Pmp22 (+2008)
Dam-NKX2-5_975	chr18	15562517	15563292	Aqp4 (-712)
Dam-NKX2-5_976	chr7	105456633	105457056	Acer3 (+1192)
Dam-NKX2-5_977	chr11	100263729	100264722	Jup (-5173)
Dam-NKX2-5_978	chr12	114376190	114376703	Crip2 (-2000)
Dam-NKX2-5_979	chr16	91548164	91548888	Ifngr2 (+1187)
Dam-NKX2-5_980	chr18	43554179	43554492	Dpysl3 (-1351)
Dam-NKX2-5_981	chr8	23294828	23295280	Ckap2 (+1237)
Dam-NKX2-5_982	chr15	3701278	3701738	NONE
Dam-NKX2-5_983	chr11	5685729	5686460	Dbnl (-2391)
Dam-NKX2-5_984	chr19	5848341	5849416	Scyl1 (-77478), Frmd8 (+26329)
Dam-NKX2-5_985	chr3	121657431	121658055	Arhgap29 (+1499)
Dam-NKX2-5_986	chr6	30252232	30253063	Gm2058 (+1891)
Dam-NKX2-5_987	chr6	128385671	128386133	Itfg2 (-10974), Fkbp4 (+2747)
Dam-NKX2-5_988	chr5	92649154	92649794	Ppef2 (+32784), Uso1 (+82510)
Dam-NKX2-5_989	chr5	69934680	69934935	Yipf7 (-937)
Dam-NKX2-5_990	chr4	129785129	129785504	Pef1 (+517)
Dam-NKX2-5_991	chr19	36424360	36424647	Pcgf5 (-29053)
Dam-NKX2-5_992	chr19	10557974	10558324	4930579J09Rik (-762)
Dam-NKX2-5_993	chr3	105716844	105717710	Adora3 (+9938), I830077J02Rik (+18305)
Dam-NKX2-5_994	chr9	37239121	37239417	Robo3 (+1491)
Dam-NKX2-5_995	chr11	115950024	115950357	Wbp2 (-1913)
Dam-NKX2-5_996	chr11	4997158	4997942	Rhbdd3 (-1891), Ewsr1 (+1530)
Dam-NKX2-5_997	chr1	9619007	9619624	3110035E14Rik (+27968), Mybl1 (+70974)
Dam-NKX2-5_998	chr8	89394048	89394376	N4bp1 (+14945)
Dam-NKX2-5_999	chr9	50540559	50540846	Dixdc1 (-4614)
Dam-NKX2-5_1000	chr19	29598651	29598993	C030046E11Rik (+2050)
Dam-NKX2-5_1001	chrX	156574512	156575407	Pdha1 (+1308)
Dam-NKX2-5_1002	chr5	5560446	5561014	Gtpbp10 (-1229)
Dam-NKX2-5_1003	chr8	96849677	96850470	Slc12a3 (-3034)
Dam-NKX2-5_1004	chrX	163647257	163648770	Tmsb4x (-864)
Dam-NKX2-5_1005	chr5	28399546	28399866	Insig1 (+1754)
Dam-NKX2-5_1006	chr3	119484755	119485052	Ptbp2 (+1402)
Dam-NKX2-5_1007	chr5	92712003	92712366	Naaa (-4978)
Dam-NKX2-5_1008	chr12	4041723	4042572	Efr3b (-3233)
Dam-NKX2-5_1009	chr4	123428135	123428423	Akirin1 (-737)
Dam-NKX2-5_1010	chr1	183951438	183951924	Enah (-1570)
Dam-NKX2-5_1011	chr3	97463283	97464163	Prkab2 (+1588)
Dam-NKX2-5_1012	chr12	88069859	88070180	Gm6772 (-5299), Angel1 (-2610)
Dam-NKX2-5_1013	chr7	80886083	80887776	Fam174b (+1737)
Dam-NKX2-5_1014	chr6	32400241	32401298	NONE
Dam-NKX2-5_1015	chr12	77939128	77939521	Fntb (+871)
Dam-NKX2-5_1016	chr19	3928769	3929303	Unc93b1 (-6150), Aldh3b1 (+680)
Dam-NKX2-5_1017	chr11	77712093	77712371	Pipox (-4858)
Dam-NKX2-5_1018	chr6	38333003	38333470	Ttc26 (+1713)
Dam-NKX2-5_1019	chr14	104920846	104921210	Rnf219 (+855)
Dam-NKX2-5_1020	chr8	73029321	73029868	2810428I15Rik (+1043)
Dam-NKX2-5_1021	chr1	120317632	120318182	Clasp1 (+32272)
Dam-NKX2-5_1022	chr7	75415478	75415987	Pgpep1l (-6614)
Dam-NKX2-5_1023	chr2	131733228	131733514	Prnp (-2293)
Dam-NKX2-5_1024	chr1	141321845	141322334	Aspm (-29260), Zbtb41 (+3130)
Dam-NKX2-5_1025	chr6	34658015	34658882	Cald1 (-995)
Dam-NKX2-5_1026	chr18	35096622	35097353	Etf1 (-5331)
Dam-NKX2-5_1027	chr8	3515977	3516231	Pnpla6 (+720)
Dam-NKX2-5_1028	chr11	22735348	22735642	B3gnt2 (+24841)
Dam-NKX2-5_1029	chr5	145952686	145953127	Atp5j2 (-446)
Dam-NKX2-5_1030	chr4	120240857	120241366	Ctps (+1769)
Dam-NKX2-5_1031	chr5	120122392	120123126	Tbx3 (+2081)
Dam-NKX2-5_1032	chr15	81844454	81844717	Xrcc6 (-2213), Pppde2 (+1984)
Dam-NKX2-5_1033	chr15	3933599	3933925	Fbxo4 (-4189)
Dam-NKX2-5_1034	chr11	90111589	90111948	Mmd (+1650)
Dam-NKX2-5_1035	chr4	131903406	131903918	Rcc1 (-1997)
Dam-NKX2-5_1036	chr2	76790838	76792031	Ttn (+29169)
Dam-NKX2-5_1037	chr13	46593506	46594263	Cap2 (-3387)
Dam-NKX2-5_1038	chr1	153738414	153738809	NONE
Dam-NKX2-5_1039	chr17	87154877	87155167	Epas1 (+1818)
Dam-NKX2-5_1040	chr3	87331451	87331775	Etv3 (+2113)
Dam-NKX2-5_1041	chr12	85746073	85746719	2900006K08Rik (-3622), Entpd5 (+3583)
Dam-NKX2-5_1042	chr2	113882754	113883307	Actc1 (-4484)
Dam-NKX2-5_1043	chr15	62053778	62054677	H2afy2 (-3222)
Dam-NKX2-5_1044	chr15	100320513	100321021	Csrnp2 (+4903), Letmd1 (+21302)
Dam-NKX2-5_1045	chr9	43877491	43878142	Usp2 (+305)
Dam-NKX2-5_1046	chr11	69447133	69447566	Fxr2 (+877)
Dam-NKX2-5_1047	chr9	108210778	108211028	Tcta (-2621), Rhoa (+2367)
Dam-NKX2-5_1048	chr11	23669611	23669933	Rel (+1198)
Dam-NKX2-5_1049	chr10	127541705	127542147	Baz2a (+12410), Rbms2 (+71698)
Dam-NKX2-5_1050	chr11	66038374	66038760	Dnahc9 (-56514)
Dam-NKX2-5_1051	chr9	21137791	21138375	Slc44a2 (-4189)
Dam-NKX2-5_1052	chr15	78870604	78870853	Galr3 (-1586)
Dam-NKX2-5_1053	chr12	41174574	41174941	Zfp277 (-2381), Dock4 (+2118)
Dam-NKX2-5_1054	chr19	5842521	5843252	Scyl1 (-71486), Frmd8 (+32321)
Dam-NKX2-5_1055	chr11	94870736	94871093	Samd14 (-278)
Dam-NKX2-5_1056	chr4	131895475	131896002	Trnau1ap (-10286), Rcc1 (+5926)
Dam-NKX2-5_1057	chr13	34130265	34130641	Bphl (+943)
Dam-NKX2-5_1058	chr11	67733949	67734319	Usp43 (+1521)
Dam-NKX2-5_1059	chr10	127747568	127748165	Cnpy2 (-11648), Pan2 (+7476)
Dam-NKX2-5_1060	chr11	59622785	59623596	Flcn (+84)
Dam-NKX2-5_1061	chr15	88850446	88851092	Panx2 (-39387), Mov10l1 (+37345)
Dam-NKX2-5_1062	chr3	96405932	96406311	Lix1l (+1066)
Dam-NKX2-5_1063	chr7	106531664	106532066	Gdpd5 (+1806)
Dam-NKX2-5_1064	chr3	88101272	88101593	1700021C14Rik (-673), Cct3 (+376)
Dam-NKX2-5_1065	chr1	88369700	88370102	Ptma (-53410), 1700019O17Rik (+46997)
Dam-NKX2-5_1066	chr2	31614052	31614344	Abl1 (-1267)
Dam-NKX2-5_1067	chr4	33277912	33278300	Pm20d2 (-1394)
Dam-NKX2-5_1068	chr4	35165911	35166266	Mobkl2b (-61374), 3110043O21Rik (+7040)
Dam-NKX2-5_1069	chrX	48372784	48373062	Rap2c (-1728)
Dam-NKX2-5_1070	chr10	87842953	87843823	Gnptab (+1231)
Dam-NKX2-5_1071	chr1	66987436	66987831	Acadl (-77793), Myl1 (+3996)
Dam-NKX2-5_1072	chr14	21875136	21875413	Ap3m1 (-3611), Adk (+3420)
Dam-NKX2-5_1073	chr12	81289199	81289627	Zfp36l1 (-75413), Actn1 (+71945)
Dam-NKX2-5_1074	chr15	76286538	76287141	Scx (-1028)
Dam-NKX2-5_1075	chr9	22216715	22217312	9530077C05Rik (+993)
Dam-NKX2-5_1076	chr13	113258552	113259010	Il6st (+4503)
Dam-NKX2-5_1077	chr8	82234713	82234972	Anapc10 (-876), Abce1 (+796)
Dam-NKX2-5_1078	chr16	32446725	32446976	Pcyt1a (+15844), Osta (+41114)
Dam-NKX2-5_1079	chr3	21976907	21977300	Tbl1xr1 (+1530)
Dam-NKX2-5_1080	chr19	37283505	37283877	Cpeb3 (-1908), March5 (+1656)
Dam-NKX2-5_1081	chr4	109331576	109331824	Cdkn2c (+6277)
Dam-NKX2-5_1082	chr8	108072284	108072561	Atp6v0d1 (+17517), Hsd11b2 (+29777)
Dam-NKX2-5_1083	chr15	41652278	41652542	Abra (+48856)
Dam-NKX2-5_1084	chr9	59138279	59138665	Adpgk (-907)
Dam-NKX2-5_1085	chr3	101406181	101407055	Atp1a1 (+1962)
Dam-NKX2-5_1086	chr10	87328940	87329984	Igf1 (+7661)
Dam-NKX2-5_1087	chr3	79392797	79393052	Ppid (-2386)
Dam-NKX2-5_1088	chr8	125932903	125933232	Tubb3 (-2396), Mc1r (+2086)
Dam-NKX2-5_1089	chr11	68716372	68716884	Rpl26 (+1560)
Dam-NKX2-5_1090	chr4	115321818	115322168	Cyp4b1 (-1683)
Dam-NKX2-5_1091	chr9	23024098	23024702	Bmper (-3120)
Dam-NKX2-5_1092	chr5	92932828	92933373	Scarb2 (+1533)
Dam-NKX2-5_1093	chr1	77045574	77046660	NONE
Dam-NKX2-5_1094	chr19	5733876	5734482	Mtvr2 (-3467), Sssca1 (-2458)
Dam-NKX2-5_1095	chr11	6194402	6194731	Ogdh (+2967)
Dam-NKX2-5_1096	chr3	85356398	85356761	Pet112l (-21471)
Dam-NKX2-5_1097	chr12	55303109	55303650	Egln3 (+1481)
Dam-NKX2-5_1098	chr16	96422874	96423521	Sh3bgr (+1121)
Dam-NKX2-5_1099	chr18	46372775	46373498	Trim36 (-876)
Dam-NKX2-5_1100	chr17	32391529	32391811	Ephx3 (-65262), Brd4 (+29398)
Dam-NKX2-5_1101	chr9	50546768	50547214	Dixdc1 (-10902), 2310030G06Rik (+7635)
Dam-NKX2-5_1102	chr19	53218962	53219407	Add3 (+698)
Dam-NKX2-5_1103	chr13	5861397	5862093	Klf6 (+1010)
Dam-NKX2-5_1104	chr5	96802192	96802560	Fras1 (-598)
Dam-NKX2-5_1105	chr15	38836684	38837498	Fzd6 (-735)
Dam-NKX2-5_1106	chr12	77277263	77277655	Esr2 (+787)
Dam-NKX2-5_1107	chr1	74169834	74170151	Rufy4 (-2122), Tns1 (+1028)
Dam-NKX2-5_1108	chr9	69862489	69862861	Gtf2a2 (+2318)
Dam-NKX2-5_1109	chr8	59992413	59992732	Hmgb2 (+1933)
Dam-NKX2-5_1110	chr5	135842136	135842495	Nsun5 (-3507)
Dam-NKX2-5_1111	chr15	76765434	76765905	1110038F14Rik (-13304), Zfp647 (-9792)
Dam-NKX2-5_1112	chr18	39082103	39083168	Fgf1 (-4283)
Dam-NKX2-5_1113	chr14	32617918	32618221	Ankrd28 (+25531)
Dam-NKX2-5_1114	chr1	133646043	133646334	Pm20d1 (-47783), Slc26a9 (+5590)
Dam-NKX2-5_1115	chr16	34992305	34992944	Ptplb (-29882)
Dam-NKX2-5_1116	chr15	83299449	83299801	Pacsin2 (-4589)
Dam-NKX2-5_1117	chr17	28171419	28172384	Tcp11 (+45627)
Dam-NKX2-5_1118	chr1	75507434	75507801	Obsl1 (-4591), Inha (+3966)
Dam-NKX2-5_1119	chr3	104438664	104439289	Slc16a1 (-3614)
Dam-NKX2-5_1120	chr8	23169818	23170180	Alg11 (-1193), Atp7b (+547)
Dam-NKX2-5_1121	chr7	117260086	117261057	Wee1 (-5001)
Dam-NKX2-5_1122	chr11	101490508	101490793	Rdm1 (+1388)
Dam-NKX2-5_1123	chr2	59451885	59452392	Tanc1 (+2038)
Dam-NKX2-5_1124	chr17	26980757	26981161	Nkx2-5 (-2449)
Dam-NKX2-5_1125	chr3	83845173	83845712	D930015E06Rik (-1360)
Dam-NKX2-5_1126	chr8	129118801	129119419	Irf2bp2 (-1774)
Dam-NKX2-5_1127	chr15	103140368	103141465	Gpr84 (-48)
Dam-NKX2-5_1128	chr19	3905258	3905509	Tcirg1 (+1749)
Dam-NKX2-5_1129	chr17	86569557	86570382	Prkce (+2845)
Dam-NKX2-5_1130	chr15	97595612	97596113	Rapgef3 (+2234)
Dam-NKX2-5_1131	chr15	76702351	76702781	Zfp251 (-701)
Dam-NKX2-5_1132	chr2	164688160	164688498	Pltp (-5121)
Dam-NKX2-5_1133	chr5	144377203	144377562	Cyth3 (-5933)
Dam-NKX2-5_1134	chr15	99050949	99051534	Kcnh3 (-4165)
Dam-NKX2-5_1135	chr18	32054608	32054929	Sft2d3 (+16788), Wdr33 (+91058)
Dam-NKX2-5_1136	chr4	136019145	136019466	Luzp1 (-6370)
Dam-NKX2-5_1137	chr18	14132638	14133976	Zfp521 (-2065)
Dam-NKX2-5_1138	chr5	13398407	13398916	Sema3a (-647)
Dam-NKX2-5_1139	chr6	134515496	134515972	Lrp6 (+1197)
Dam-NKX2-5_1140	chr3	144237198	144237568	Hs2st1 (-4203), Sep15 (+3992)
Dam-NKX2-5_1141	chr11	5852163	5852531	Ykt6 (-3414), Gck (-2745)
Dam-NKX2-5_1142	chr15	83265219	83265511	Arfgap3 (-84688), Pacsin2 (+29671)
Dam-NKX2-5_1143	chr6	118708046	118708916	NONE
Dam-NKX2-5_1144	chr10	41194310	41194558	Mical1 (-1686)
Dam-NKX2-5_1145	chr9	117159699	117159955	NONE
Dam-NKX2-5_1146	chr6	149086351	149086753	4833442J19Rik (-3567)
Dam-NKX2-5_1147	chr14	55616058	55616394	Myh7 (-2840)
Dam-NKX2-5_1148	chr12	112279251	112279683	Rcor1 (+1458)
Dam-NKX2-5_1149	chr11	86791150	86791474	Ypel2 (+15952)
Dam-NKX2-5_1150	chr7	66098382	66099131	NONE
Dam-NKX2-5_1151	chr13	101601975	101602670	Slc30a5 (+1059)
Dam-NKX2-5_1152	chr9	111024133	111024478	Lrrfip2 (+3691)
Dam-NKX2-5_1153	chr2	155431430	155431988	Myh7b (-5239)
Dam-NKX2-5_1154	chr4	43571181	43571546	Creb3 (-4142), Tln1 (+4091)
Dam-NKX2-5_1155	chr3	60334855	60335477	Mbnl1 (+29992)
Dam-NKX2-5_1156	chr5	24604369	24604822	Prkag2 (+1864)
Dam-NKX2-5_1157	chr11	30673878	30674282	Psme4 (+2305)
Dam-NKX2-5_1158	chr11	109511106	109511464	Prkar1a (-978)
Dam-NKX2-5_1159	chr8	116159087	116159410	Mon1b (-237)
Dam-NKX2-5_1160	chr19	10255632	10255964	Fads1 (-1580)
Dam-NKX2-5_1161	chr4	128966729	128967151	Sync (+2075)
Dam-NKX2-5_1162	chr11	60873442	60873802	Kcnj12 (-5684)
Dam-NKX2-5_1163	chr7	106294972	106295492	Uvrag (-5578)
Dam-NKX2-5_1164	chr3	88214985	88215423	Pmf1 (-966)
Dam-NKX2-5_1165	chr3	108169175	108169802	Mybphl (+1660)
Dam-NKX2-5_1166	chr4	132529065	132529443	Fgr (-756)
Dam-NKX2-5_1167	chr19	10251478	10252179	Fads1 (-5549)
Dam-NKX2-5_1168	chr3	146164060	146164972	Spata1 (-1799), Gng5 (+1716)
Dam-NKX2-5_1169	chr16	89569012	89569414	Krtap11-1 (+2215)
Dam-NKX2-5_1170	chr6	145882948	145883490	Sspn (+552)
Dam-NKX2-5_1171	chr19	9059074	9059722	Eef1g (+17867)
Dam-NKX2-5_1172	chr17	29410796	29411204	Pi16 (-44827), BC004004 (+5267)
Dam-NKX2-5_1173	chr17	26650781	26651187	Dusp1 (-5567)
Dam-NKX2-5_1174	chr6	34547049	34547406	NONE
Dam-NKX2-5_1175	chr18	61557684	61557984	Ppargc1b (+2251)
Dam-NKX2-5_1176	chr4	124575466	124576220	Epha10 (+16814), Cdca8 (+38318)
Dam-NKX2-5_1177	chr7	30983649	30984010	Capns1 (-3763)
Dam-NKX2-5_1178	chr14	120719719	120720159	Mbnl2 (+45048)
Dam-NKX2-5_1179	chr12	76915564	76916270	Syne2 (-3388)
Dam-NKX2-5_1180	chr3	104021776	104022295	Magi3 (+2293)
Dam-NKX2-5_1181	chr6	86796104	86796759	Aak1 (-3079)
Dam-NKX2-5_1182	chr8	28270739	28271235	Brf2 (-31883), Rab11fip1 (+14131)
Dam-NKX2-5_1183	chr2	121982417	121982831	Trim69 (-3812)
Dam-NKX2-5_1184	chr3	116670163	116670553	Palmd (+1512)
Dam-NKX2-5_1185	chr11	101033518	101033764	Cntnap1 (-3790), Plekhh3 (-1025)
Dam-NKX2-5_1186	chr16	4623603	4624104	Pam16 (+1092)
Dam-NKX2-5_1187	chr1	174038630	174039002	Ncstn (-25936), Pex19 (-18070)
Dam-NKX2-5_1188	chr15	83261696	83262162	Arfgap3 (-81252), Pacsin2 (+33107)
Dam-NKX2-5_1189	chr2	58417357	58417958	Acvr1 (+1581)
Dam-NKX2-5_1190	chr9	65973935	65974242	Snx1 (-1396), Fam96a (-329)
Dam-NKX2-5_1191	chr2	29929814	29930096	Pkn3 (-4331)
Dam-NKX2-5_1192	chr2	71049373	71049812	Dync1i2 (-410)
Dam-NKX2-5_1193	chr3	84017444	84017925	Mnd1 (-57977), Trim2 (+7114)
Dam-NKX2-5_1194	chr13	117816276	117816933	Parp8 (-2282)
Dam-NKX2-5_1195	chr3	108167271	108167768	Mybphl (-309)
Dam-NKX2-5_1196	chr1	155038348	155038961	Lamc2 (-5078), Lamc2 (-5078)
Dam-NKX2-5_1197	chr17	74925555	74926447	Birc6 (-1634)
Dam-NKX2-5_1198	chr9	95539732	95540228	Pcolce2 (+1933)
Dam-NKX2-5_1199	chr4	108675055	108675622	Nrd1 (+1929)
Dam-NKX2-5_1200	chr4	59560566	59560817	Rod1 (+1544)
Dam-NKX2-5_1201	chr17	24553797	24554135	Rnps1 (+2346)
Dam-NKX2-5_1202	chr2	13477069	13477413	Vim (-18697), Trdmt1 (-10950)
Dam-NKX2-5_1203	chr11	102911735	102912212	Nmt1 (+22098), Plcd3 (+50998)
Dam-NKX2-5_1204	chr6	146675122	146675921	Stk38l (+2070)
Dam-NKX2-5_1205	chr11	62467531	62467997	BC046404 (-5739), Mmgt2 (+5598)
Dam-NKX2-5_1206	chr5	139474945	139475378	Pdgfa (-4255)
Dam-NKX2-5_1207	chr8	107688700	107689195	Cbfb (-5626)
Dam-NKX2-5_1208	chr4	14166684	14167323	NONE
Dam-NKX2-5_1209	chr8	88079932	88080271	Dnaja2 (-932)
Dam-NKX2-5_1210	chr4	135865914	135866176	Hnrnpr (-846)
Dam-NKX2-5_1211	chr17	15961787	15962101	Rgmb (+1606)
Dam-NKX2-5_1212	chr2	148705894	148706219	Cst3 (-4853)
Dam-NKX2-5_1213	chr19	24948592	24948929	Pgm5 (-12429), Foxd4 (+27038)
Dam-NKX2-5_1214	chr17	33920121	33920441	Angptl4 (-1761)
Dam-NKX2-5_1215	chr9	30723567	30724794	Adamts15 (+5856)
Dam-NKX2-5_1216	chr18	4351308	4351608	Map3k8 (+1493)
Dam-NKX2-5_1217	chr6	88416030	88416411	Ruvbl1 (+804)
Dam-NKX2-5_1218	chr15	59036534	59037500	NONE
Dam-NKX2-5_1219	chr17	75864473	75864798	Rasgrp3 (+29391), Fam98a (+86650)
Dam-NKX2-5_1220	chr8	35212198	35212744	Tmem66 (-5146), Leprotl1 (-2678)
Dam-NKX2-5_1221	chr7	54101857	54102150	Ldha (-448)
Dam-NKX2-5_1222	chr1	179725545	179725982	Adss (+876)
Dam-NKX2-5_1223	chr5	124120841	124121476	Vps33a (-98135), Clip1 (+13141)
Dam-NKX2-5_1224	chr1	108073281	108073926	Phlpp1 (+5158)
Dam-NKX2-5_1225	chr10	62920649	62921501	Ctnna3 (+28229)
Dam-NKX2-5_1226	chr15	42968270	42968591	Rspo2 (+33933)
Dam-NKX2-5_1227	chr17	15960974	15961377	Rgmb (+2374)
Dam-NKX2-5_1228	chr17	43942658	43943188	Rcan2 (+4123)
Dam-NKX2-5_1229	chr7	148124700	148125050	Athl1 (-2605)
Dam-NKX2-5_1230	chr14	61876291	61877677	Sgcg (+343)
Dam-NKX2-5_1231	chr12	86339324	86339805	Ylpm1 (+2294)
Dam-NKX2-5_1232	chr1	77057790	77058115	NONE
Dam-NKX2-5_1233	chr7	53926639	53926962	Tph1 (-4083)
Dam-NKX2-5_1234	chr8	109456300	109456666	Sntb2 (-3167)
Dam-NKX2-5_1235	chr8	87823807	87824252	Vps35 (-634), Orc6 (+499)
Dam-NKX2-5_1236	chr8	90721948	90722586	Papd5 (-845)
Dam-NKX2-5_1237	chr8	87504989	87505648	Junb (-2702)
Dam-NKX2-5_1238	chr11	79894966	79895205	Crlf3 (-629)
Dam-NKX2-5_1239	chr15	76095647	76096080	Spatc1 (-2655)
Dam-NKX2-5_1240	chr3	146516693	146516985	Ttll7 (+1508)
Dam-NKX2-5_1241	chr2	153173693	153174321	Asxl1 (+2132)
Dam-NKX2-5_1242	chr1	191985859	191986758	Prox1 (+8250)
Dam-NKX2-5_1243	chr19	12868459	12868745	Lpxn (-4497), Zfp91 (+2011)
Dam-NKX2-5_1244	chr4	9571368	9571975	Asph (+24637)
Dam-NKX2-5_1245	chr4	119489404	119489787	Hivep3 (+2313)
Dam-NKX2-5_1246	chr8	3276935	3277299	Insr (+2500)
Dam-NKX2-5_1247	chr1	51347043	51347589	Sdpr (+1346)
Dam-NKX2-5_1248	chr1	93196152	93196411	Scly (+1367)
Dam-NKX2-5_1249	chr11	68696308	68696849	Rnf222 (-5476)
Dam-NKX2-5_1250	chr6	116212482	116212809	Anubl1 (-1607)
Dam-NKX2-5_1251	chr5	75439052	75439549	Chic2 (+1350)
Dam-NKX2-5_1252	chr12	56594343	56594804	Nfkbia (-940)
Dam-NKX2-5_1253	chr5	77356958	77357825	Paics (-23044), Aasdh (-22853)
Dam-NKX2-5_1254	chr9	21091365	21091685	Kri1 (+888)
Dam-NKX2-5_1255	chr4	155149177	155149860	Vwa1 (-849)
Dam-NKX2-5_1256	chr6	120853421	120853755	Bid (+13250), Bcl2l13 (+67340)
Dam-NKX2-5_1257	chr15	86043671	86044033	Tbc1d22a (-1037)
Dam-NKX2-5_1258	chr17	10519288	10519687	Qk (-7262)
Dam-NKX2-5_1259	chr4	147275133	147275486	Mfn2 (+3618), Fv1 (+32222)
Dam-NKX2-5_1260	chr2	32393318	32393682	Dpm2 (-32878), Fam102a (+2621)
Dam-NKX2-5_1261	chr7	28229952	28230513	Blvrb (-2764), Spnb4 (+1375)
Dam-NKX2-5_1262	chr14	32088256	32088560	Bap1 (+23733), Dnahc1 (+48674)
Dam-NKX2-5_1263	chr19	40530817	40531066	Sorbs1 (+57360)
Dam-NKX2-5_1264	chr7	80521844	80522306	Rgma (+1669)
Dam-NKX2-5_1265	chr4	148798741	148799062	Ube4b (+1838)
Dam-NKX2-5_1266	chr3	126301658	126302093	Camk2d (+1985)
Dam-NKX2-5_1267	chr11	45756124	45756645	Lsm11 (+2052)
Dam-NKX2-5_1268	chr12	77809198	77809482	Spnb1 (+2194)
Dam-NKX2-5_1269	chr11	100829406	100830083	Ptrf (+2186)
Dam-NKX2-5_1270	chr11	102961427	102962023	Acbd4 (-1277), Plcd3 (+1247)
Dam-NKX2-5_1271	chr16	94596017	94596277	Pigp (-3525)
Dam-NKX2-5_1272	chr8	114257312	114257667	Ctrb1 (-42580), Bcar1 (+10259)
Dam-NKX2-5_1273	chr16	21788216	21788474	Ehhadh (-438)
Dam-NKX2-5_1274	chr1	181079462	181080067	NONE
Dam-NKX2-5_1275	chr7	54089196	54089441	Ldha (-13133), Gtf2h1 (+37855)
Dam-NKX2-5_1276	chr6	51278502	51278898	NONE
Dam-NKX2-5_1277	chr7	91096751	91097107	Mesdc2 (+56419)
Dam-NKX2-5_1278	chr6	5250438	5250689	Pon2 (-2191)
Dam-NKX2-5_1279	chr8	64381970	64382458	Palld (-727)
Dam-NKX2-5_1280	chr6	149256567	149256823	2810474O19Rik (-1241)
Dam-NKX2-5_1281	chr11	68788089	68788502	Rangrf (-974)
Dam-NKX2-5_1282	chr1	43247524	43247921	Rpl29 (+1757)
Dam-NKX2-5_1283	chr17	24664856	24665497	Traf7 (-294)
Dam-NKX2-5_1284	chr15	41700274	41700592	Abra (+833)
Dam-NKX2-5_1285	chr12	4697253	4697580	4930417G10Rik (+47772), Itsn2 (+97603)
Dam-NKX2-5_1286	chr1	71354183	71354677	NONE
Dam-NKX2-5_1287	chr11	19819757	19820283	Spred2 (-4425)
Dam-NKX2-5_1288	chr11	115334616	115334902	Armc7 (-2232)
Dam-NKX2-5_1289	chr2	83653876	83654503	Fam171b (+1305)
Dam-NKX2-5_1290	chr7	16988329	16988571	Zc3h4 (+1905)
Dam-NKX2-5_1291	chr2	163469514	163469767	Serinc3 (+1238)
Dam-NKX2-5_1292	chr2	92021993	92022461	Phf21a (-39402)
Dam-NKX2-5_1293	chr2	153319442	153319731	8430427H17Rik (+36120)
Dam-NKX2-5_1294	chr12	75010354	75010706	Hif1a (+1676)
Dam-NKX2-5_1295	chr6	92134309	92134861	Mrps25 (-568)
Dam-NKX2-5_1296	chr2	13478089	13478334	Vim (-17726), Trdmt1 (-11921)
Dam-NKX2-5_1297	chr15	57819512	57819910	Fam83a (+2253)
Dam-NKX2-5_1298	chr12	106248911	106249395	Glrx5 (-21746), 4831426I19Rik (-12266)
Dam-NKX2-5_1299	chr3	84108623	84109101	Trim2 (-84063)
Dam-NKX2-5_1300	chr8	110110515	110110894	Psmd7 (+1677)
Dam-NKX2-5_1301	chr2	164604195	164605131	Tnnc2 (+571)
Dam-NKX2-5_1302	chr4	107642468	107642750	Slc1a7 (+1670)
Dam-NKX2-5_1303	chr13	74487350	74487703	Ccdc127 (-238), Sdha (+161)
Dam-NKX2-5_1304	chr15	99554535	99554826	2310016M24Rik (-1368)
Dam-NKX2-5_1305	chr5	143025699	143026133	Radil (+1115)
Dam-NKX2-5_1306	chr4	133951595	133952177	Pafah2 (-389)
Dam-NKX2-5_1307	chr5	130740911	130741160	Tyw1 (+8129)
Dam-NKX2-5_1308	chr3	83644163	83644432	Tlr2 (+1232)
Dam-NKX2-5_1309	chr17	29628969	29629504	Pim1 (+1247)
Dam-NKX2-5_1310	chr10	53068748	53069319	Pln (+11542), Gm9766 (+30623)
Dam-NKX2-5_1311	chr18	13019561	13019890	Osbpl1a (+80503)
Dam-NKX2-5_1312	chr18	60787453	60788055	Synpo (+1985)
Dam-NKX2-5_1313	chr5	115506648	115506974	Sppl3 (+45278), Acads (+62511)
Dam-NKX2-5_1314	chr1	44175243	44175994	Bivm (-1194), Kdelc1 (-1)
Dam-NKX2-5_1315	chr10	92911059	92911355	Lta4h (-4934)
Dam-NKX2-5_1316	chr8	109642306	109643103	Cyb5b (-31856), Terf2 (-22260)
Dam-NKX2-5_1317	chr3	98567761	98568006	Hsd3b3 (-1551)
Dam-NKX2-5_1318	chr7	88356848	88357199	Pde8a (-1666)
Dam-NKX2-5_1319	chr6	125136391	125136642	Mrpl51 (-5701), Ncapd2 (+5087)
Dam-NKX2-5_1320	chr1	153190247	153190559	Ivns1abp (-1225)
Dam-NKX2-5_1321	chr11	68853224	68853693	Aurkb (-5686)
Dam-NKX2-5_1322	chr5	122949471	122950225	Atp2a2 (+2386)
Dam-NKX2-5_1323	chr11	77925523	77926065	BC017647 (+17619), Traf4 (+53258)
Dam-NKX2-5_1324	chr9	66788399	66788774	Rps27l (-5338)
Dam-NKX2-5_1325	chr1	156944406	156945033	Mr1 (+49190)
Dam-NKX2-5_1326	chr14	76248204	76248465	Tpt1 (+3272)
Dam-NKX2-5_1327	chr16	11070717	11071212	Snn (+4574), Txndc11 (+63660)
Dam-NKX2-5_1328	chr5	125338018	125338346	Zfp664 (-4893), Ccdc92 (+4409)
Dam-NKX2-5_1329	chr19	34333794	34334118	Acta2 (-4130)
Dam-NKX2-5_1330	chr9	57610263	57611165	Clk3 (+2953), Edc3 (+54338)
Dam-NKX2-5_1331	chr10	32803168	32803803	Trdn (+197)
Dam-NKX2-5_1332	chr10	116803050	116803477	Lyz1 (-73340), Cpsf6 (+10765)
Dam-NKX2-5_1333	chr5	24105369	24105704	Smarcd3 (+2283)
Dam-NKX2-5_1334	chr1	152838784	152839148	Hmcn1 (+1599)
Dam-NKX2-5_1335	chr3	60306770	60307089	Mbnl1 (+1756)
Dam-NKX2-5_1336	chr11	4496087	4496347	Mtmr3 (-1399)
Dam-NKX2-5_1337	chr4	115692607	115693009	Faah (-2301)
Dam-NKX2-5_1338	chr8	97872080	97872326	Mmp15 (-4034)
Dam-NKX2-5_1339	chr10	69034377	69035061	Ank3 (+38263)
Dam-NKX2-5_1340	chr2	18595670	18596004	Bmi1 (-2808), Commd3 (+1748)
Dam-NKX2-5_1341	chr9	70426049	70426343	Sltm (+35611), Fam63b (+78785)
Dam-NKX2-5_1342	chr10	82320762	82321974	Eid3 (-8003), Txnrd1 (+24672)
Dam-NKX2-5_1343	chr12	113833446	113833751	Adssl1 (-24659), Inf2 (+6604)
Dam-NKX2-5_1344	chr7	105985137	105985494	Wnt11 (-2039)
Dam-NKX2-5_1345	chr17	44272859	44273397	Clic5 (-52393), Enpp4 (-30371)
Dam-NKX2-5_1346	chr9	119230278	119230604	Oxsr1 (-16406), Myd88 (+18717)
Dam-NKX2-5_1347	chr19	42332025	42332318	Golga7b (+10104)
Dam-NKX2-5_1348	chr5	135165528	135165785	Limk1 (-1197)
Dam-NKX2-5_1349	chr4	14790743	14791032	Tmem55a (-478)
Dam-NKX2-5_1350	chr6	134514568	134515054	Lrp6 (+2120)
Dam-NKX2-5_1351	chr5	122730401	122731504	Pptc7 (-3454)
Dam-NKX2-5_1352	chr12	73863399	73863742	Ppm1a (+1373)
Dam-NKX2-5_1353	chr13	94075685	94076113	Homer1 (+1449)
Dam-NKX2-5_1354	chr6	87801600	87801880	Cnbp (-640)
Dam-NKX2-5_1355	chr16	77501920	77502269	NONE
Dam-NKX2-5_1356	chr5	91947720	91948022	Parm1 (+1145)
Dam-NKX2-5_1357	chr8	108421569	108421850	Pskh1 (-2664)
Dam-NKX2-5_1358	chr5	9266704	9266995	9330182L06Rik (+657)
Dam-NKX2-5_1359	chr17	82139862	82140224	Slc8a1 (-2326)
Dam-NKX2-5_1360	chr16	5134551	5134822	Ppl (-2113)
Dam-NKX2-5_1361	chr4	132193865	132194541	Eya3 (-758)
Dam-NKX2-5_1362	chr4	133227968	133228268	Pigv (+444)
Dam-NKX2-5_1363	chr3	122816841	122817659	Myoz2 (-79345)
Dam-NKX2-5_1364	chr15	58052177	58052429	Fbxo32 (-5870)
Dam-NKX2-5_1365	chr2	39080697	39081094	Ppp6c (+962)
Dam-NKX2-5_1366	chr4	134484033	134484286	Syf2 (-2735)
Dam-NKX2-5_1367	chr5	64552844	64553370	Tbc1d1 (+1657)
Dam-NKX2-5_1368	chr3	90238354	90238595	Ints3 (-917)
Dam-NKX2-5_1369	chr1	164669394	164669686	Prrc2c (+1147)
Dam-NKX2-5_1370	chr3	95422185	95422426	Ensa (-6596), Golph3l (+29450)
Dam-NKX2-5_1371	chr11	31772586	31772943	Cpeb4 (+554)
Dam-NKX2-5_1372	chr7	119899897	119900373	Tead1 (+77301)
Dam-NKX2-5_1373	chr3	108166548	108166959	Mybphl (-1075)
Dam-NKX2-5_1374	chr7	96786862	96787189	Me3 (+5698)
Dam-NKX2-5_1375	chr1	173084501	173084748	Sdhc (-3891), Mpz (+3781)
Dam-NKX2-5_1376	chr9	46082576	46083177	Zfp259 (+1730)
Dam-NKX2-5_1377	chr11	29621002	29621251	Rtn4 (+28229)
Dam-NKX2-5_1378	chr4	59820093	59820406	Snx30 (+1728)
Dam-NKX2-5_1379	chr7	108467219	108467579	Stard10 (-2365)
Dam-NKX2-5_1380	chr10	21160300	21160768	Aldh8a1 (+63428)
Dam-NKX2-5_1381	chr11	66035963	66036215	Dnahc9 (-54036)
Dam-NKX2-5_1382	chr8	59798107	59798583	Hand2 (-1435)
Dam-NKX2-5_1383	chr11	96779361	96779648	Cdk5rap3 (-1710)
Dam-NKX2-5_1384	chr6	59160381	59160789	Tigd2 (+1721)
Dam-NKX2-5_1385	chr15	99082564	99083135	Mcrs1 (-458)
Dam-NKX2-5_1386	chr8	108702436	108703106	Slc7a6 (+9996), Slc7a6os (+32062)
Dam-NKX2-5_1387	chr5	151991080	151991606	Stard13 (+1425)
Dam-NKX2-5_1388	chr11	88015454	88016310	Mrps23 (-2038)
Dam-NKX2-5_1389	chr1	66985448	66985781	Acadl (-75774), Myl1 (+6015)
Dam-NKX2-5_1390	chr12	85740925	85741396	Entpd5 (+8818), Coq6 (+38243)
Dam-NKX2-5_1391	chr19	47654958	47655385	Slk (+663)
Dam-NKX2-5_1392	chrX	10292384	10292824	Mid1ip1 (-1887)
Dam-NKX2-5_1393	chr15	3973952	3974286	Oxct1 (-2309)
Dam-NKX2-5_1394	chr4	116393760	116394070	Tesk2 (+355)
Dam-NKX2-5_1395	chr1	63161565	63162109	Ino80d (-996)
Dam-NKX2-5_1396	chrX	10293319	10293760	Mid1ip1 (-951)
Dam-NKX2-5_1397	chr12	60159992	60160264	Trappc6b (+2320)
Dam-NKX2-5_1398	chr4	148680445	148680729	Kif1b (+1220)
Dam-NKX2-5_1399	chr19	4791426	4791975	Rbm14 (+19933), Rbm4b (+35176)
Dam-NKX2-5_1400	chr8	32223807	32224126	Rnf122 (+1649)
Dam-NKX2-5_1401	chr11	120930234	120930778	Sectm1b (-5623)
Dam-NKX2-5_1402	chr9	111023362	111023887	Lrrfip2 (+3010)
Dam-NKX2-5_1403	chr1	193401879	193402203	Dtl (-2628), Ints7 (+2428)
Dam-NKX2-5_1404	chr14	120676096	120676775	Mbnl2 (+1545)
Dam-NKX2-5_1405	chr13	8871385	8871840	Wdr37 (-1325)
Dam-NKX2-5_1406	chr5	31796281	31796711	Gpn1 (-638)
Dam-NKX2-5_1407	chr17	50645910	50646277	Plcl2 (-2778)
Dam-NKX2-5_1408	chr19	5429348	5430656	Drap1 (-5086), AI837181 (+4858)
Dam-NKX2-5_1409	chr4	115797164	115797622	Rad54l (-1098)
Dam-NKX2-5_1410	chr16	28751688	28752233	NONE
Dam-NKX2-5_1411	chr19	36910077	36910497	Tnks2 (+1565)
Dam-NKX2-5_1412	chr17	53735514	53735950	Kat2b (+29436), Sgol1 (+92908)
Dam-NKX2-5_1413	chr19	29327395	29327837	Jak2 (+1298)
Dam-NKX2-5_1414	chr12	88289422	88289841	2310044G17Rik (+1339)
Dam-NKX2-5_1415	chr1	43788515	43788984	1500015O10Rik (+1303)
Dam-NKX2-5_1416	chr11	94849819	94850248	Ppp1r9b (-2492)
Dam-NKX2-5_1417	chr1	20910981	20911307	Efhc1 (-30563), Paqr8 (+30441)
Dam-NKX2-5_1418	chr12	83713612	83714328	Rgs6 (-4055)
Dam-NKX2-5_1419	chr6	115624539	115625576	Raf1 (+1595)
Dam-NKX2-5_1420	chr4	133849101	133849426	Pdik1l (-6096)
Dam-NKX2-5_1421	chr8	26061049	26061295	Adam32 (-1896)
Dam-NKX2-5_1422	chr7	109115396	109115687	Numa1 (-2815)
Dam-NKX2-5_1423	chr5	124231922	124232283	Kntc1 (+32368), Niacr1 (+83415)
Dam-NKX2-5_1424	chr5	21211087	21211364	Napepld (-4063)
Dam-NKX2-5_1425	chr8	47295228	47295481	Slc25a4 (+1008)
Dam-NKX2-5_1426	chr7	116894371	116894863	Tmem9b (+1160)
Dam-NKX2-5_1427	chr5	36918300	36918591	Tbc1d14 (+10429), Ccdc96 (+91209)
Dam-NKX2-5_1428	chr3	57650331	57650653	Pfn2 (+1187)
Dam-NKX2-5_1429	chr11	107412682	107412968	Helz (+3551)
Dam-NKX2-5_1430	chr19	24750719	24750969	E030010A14Rik (+2346)
Dam-NKX2-5_1431	chr4	84318440	84318695	Bnc2 (+2422)
Dam-NKX2-5_1432	chr16	94830432	94831049	Dyrk1a (+38928)
Dam-NKX2-5_1433	chr13	104126087	104126624	Mast4 (-1784)
Dam-NKX2-5_1434	chr11	21469658	21470706	AV249152 (-2102), Mdh1 (+1755)
Dam-NKX2-5_1435	chr3	122820367	122820669	Myoz2 (-82613)
Dam-NKX2-5_1436	chr12	104575534	104575898	Prima1 (-95360), Asb2 (+18495)
Dam-NKX2-5_1437	chr17	26976119	26976446	Nkx2-5 (+2227)
Dam-NKX2-5_1438	chr10	87321691	87321941	Igf1 (+15)
Dam-NKX2-5_1439	chr8	87824940	87825195	Vps35 (-1672), Orc6 (+1537)
Dam-NKX2-5_1440	chr9	25291373	25291637	Eepd1 (+2323)
Dam-NKX2-5_1441	chr6	33213308	33213739	Exoc4 (+14374)
Dam-NKX2-5_1442	chr2	14522826	14523200	CacnB2 (-3730), Cacnb2 (-2920)
Dam-NKX2-5_1443	chr7	80683333	80684138	Chd2 (+2896)
Dam-NKX2-5_1444	chr15	103102760	103103019	Copz1 (-459)
Dam-NKX2-5_1445	chr4	134827137	134827666	Clic4 (+1273)
Dam-NKX2-5_1446	chr19	43990497	43991103	Dnmbp (-3918)
Dam-NKX2-5_1447	chr8	108087258	108087512	Atp6v0d1 (+2555), Hsd11b2 (+44739)
Dam-NKX2-5_1448	chrX	148370471	148370828	Hsd17b10 (-65789)
Dam-NKX2-5_1449	chr9	102912752	102913032	Slco2a1 (+3232)
Dam-NKX2-5_1450	chr19	60834216	60834679	Nanos1 (+2558), Eif3a (+32148)
Dam-NKX2-5_1451	chr6	58972955	58973335	Fam13a (+1351)
Dam-NKX2-5_1452	chr9	24954793	24955054	Herpud2 (+1356)
Dam-NKX2-5_1453	chr13	94074983	94075401	Homer1 (+742)
Dam-NKX2-5_1454	chr5	144876159	144876511	Bhlha15 (-74820), Lmtk2 (+15030)
Dam-NKX2-5_1455	chr4	13671141	13671430	Runx1t1 (+837)
Dam-NKX2-5_1456	chr4	148832221	148832470	Rbp7 (-3269)
Dam-NKX2-5_1457	chr8	81583030	81583382	Zfp827 (+30870)
Dam-NKX2-5_1458	chr19	5469382	5469865	Efemp2 (-5111), Ctsw (-1126)
Dam-NKX2-5_1459	chr6	145883925	145884370	Sspn (+1481)
Dam-NKX2-5_1460	chr2	26770997	26771310	Med22 (-4992), Surf1 (+896)
Dam-NKX2-5_1461	chr16	23986738	23987081	Bcl6 (+1788)
Dam-NKX2-5_1462	chr17	28316481	28316734	Zfp523 (+2245)
Dam-NKX2-5_1463	chr5	30889316	30889610	Kcnk3 (-1080)
Dam-NKX2-5_1464	chr10	58137130	58137555	Edar (+1101)
Dam-NKX2-5_1465	chr5	35256325	35256686	A930005I04Rik (-2058)
Dam-NKX2-5_1466	chr15	35299970	35300516	Vps13b (-1058)
Dam-NKX2-5_1467	chr6	54211135	54211389	Prr15 (-65744)
Dam-NKX2-5_1468	chr12	86291589	86292202	Ltbp2 (-74451), 1110018G07Rik (+19940)
Dam-NKX2-5_1469	chr2	119913218	119913465	Pla2g4b (+54173), Ehd4 (+66969)
Dam-NKX2-5_1470	chr12	81286819	81287355	Zfp36l1 (-73087), Actn1 (+74271)
Dam-NKX2-5_1471	chr7	28377779	28378221	Akt2 (-12879), 2310022A10Rik (+39686)
Dam-NKX2-5_1472	chr11	97172341	97173153	Mrpl45 (-4283)
Dam-NKX2-5_1473	chr9	71438418	71439109	Gcom1 (+1403)
Dam-NKX2-5_1474	chr9	22236424	22236780	9530077C05Rik (+20581), rp9 (+36198)
Dam-NKX2-5_1475	chr8	41979753	41980003	Pdgfrl (-31709), Slc7a2 (+32157)
Dam-NKX2-5_1476	chr9	108164401	108164650	Dag1 (+1541)
Dam-NKX2-5_1477	chr17	29493174	29493531	Fgd2 (-4506)
Dam-NKX2-5_1478	chr13	104968613	104968867	2410002O22Rik (-194), 2410002O22Rik (-194), Trim23 (-179)
Dam-NKX2-5_1479	chr5	45885412	45886044	Lap3 (+1115)
Dam-NKX2-5_1480	chr7	80894004	80894255	Fam174b (+8937)
Dam-NKX2-5_1481	chr15	66646775	66647100	Sla (-2783)
Dam-NKX2-5_1482	chr3	127491777	127492371	Tifa (-757)
Dam-NKX2-5_1483	chr5	115721333	115721861	Rnf10 (+1307)
Dam-NKX2-5_1484	chr13	49309447	49309983	1110007C09Rik (+1680)
Dam-NKX2-5_1485	chr1	79760501	79760906	Wdfy1 (-2360)
Dam-NKX2-5_1486	chr9	45793288	45793869	Pafah1b2 (-625)
Dam-NKX2-5_1487	chr8	119609254	119609652	Pkd1l2 (-3104)
Dam-NKX2-5_1488	chr9	41036909	41037240	Ubash3b (-71498)
Dam-NKX2-5_1489	chr9	110854557	110855145	Tdgf1 (-6189), Lrrc2 (+802)
Dam-NKX2-5_1490	chr2	76487085	76487659	Prkra (-1321), Dfnb59 (-958)
Dam-NKX2-5_1491	chr15	102352621	102353056	Map3k12 (-5404), Npff (+2213)
Dam-NKX2-5_1492	chrX	71489312	71489579	Flna (+2427)
Dam-NKX2-5_1493	chr16	4640712	4640996	Vasn (+909)
Dam-NKX2-5_1494	chr2	157967080	157968262	Tgm2 (+4457)
Dam-NKX2-5_1495	chr14	32616608	32617015	Ankrd28 (+26789)
Dam-NKX2-5_1496	chr13	118392554	118393271	Hcn1 (+1786)
Dam-NKX2-5_1497	chr4	151691810	151692272	Rnf207 (+693)
Dam-NKX2-5_1498	chr19	8904151	8904437	Gng3 (+9442), Hnrnpul2 (+10403)
Dam-NKX2-5_1499	chr11	77956501	77956749	Traf4 (+22427), BC017647 (+48450)
Dam-NKX2-5_1500	chr11	94191315	94191570	Ankrd40 (+2128)
Dam-NKX2-5_1501	chr19	9163212	9163466	Scgb1a1 (-893)
Dam-NKX2-5_1502	chr3	96406963	96407524	Lix1l (+2188)
Dam-NKX2-5_1503	chr5	105947283	105947752	Lrrc8c (-972)
Dam-NKX2-5_1504	chr5	77288530	77288998	C530008M17Rik (+19120), Aasdh (+45775)
Dam-NKX2-5_1505	chr8	108662379	108662765	Esrp2 (-1698)
Dam-NKX2-5_1506	chr6	38143500	38143969	Atp6v0a4 (-69149), D630045J12Rik (+60274)
Dam-NKX2-5_1507	chr7	87520199	87520564	Man2a2 (-4370)
Dam-NKX2-5_1508	chr4	43740791	43741222	Hrct1 (+937)
Dam-NKX2-5_1509	chr4	134475655	134476280	Tmem50a (-5137), D4Wsu53e (-3572)
Dam-NKX2-5_1510	chr6	120307155	120307798	Ccdc77 (-99)
Dam-NKX2-5_1511	chr11	44215396	44215671	Il12b (+1969)
Dam-NKX2-5_1512	chr2	35833560	35833887	Ttll11 (+1420)
Dam-NKX2-5_1513	chr6	24547737	24548027	Lmod2 (+111)
Dam-NKX2-5_1514	chr2	131732013	131732265	Prnp (-3525)
Dam-NKX2-5_1515	chr2	181413901	181414146	Tcea2 (-991)
Dam-NKX2-5_1516	chr8	109860328	109860666	Nfat5 (+43127), Nqo1 (+66608)
Dam-NKX2-5_1517	chr4	118960763	118961041	Ybx1 (+6216), Cldn19 (+32856)
Dam-NKX2-5_1518	chr1	78808310	78808640	Kcne4 (-5049)
Dam-NKX2-5_1519	chr2	181228946	181229327	Tpd52l2 (-2821), Abhd16b (+1226)
Dam-NKX2-5_1520	chr15	11831966	11832227	Npr3 (+3332)
Dam-NKX2-5_1521	chr2	155936004	155936512	Cpne1 (+1443), Rbm12 (+1443)
Dam-NKX2-5_1522	chr2	32210143	32210466	Dnm1 (-1481)
Dam-NKX2-5_1523	chr12	88228423	88228679	6430527G18Rik (-2787)
Dam-NKX2-5_1524	chr12	4925575	4926141	Atad2b (+1699)
Dam-NKX2-5_1525	chr8	129468131	129468450	Tomm20 (+1439)
Dam-NKX2-5_1526	chr11	80110694	80111237	Rhbdl3 (-3448)
Dam-NKX2-5_1527	chr7	87326571	87327358	Sema4b (-4762)
Dam-NKX2-5_1528	chr4	33294874	33295369	Srsf13b (-844)
Dam-NKX2-5_1529	chr12	88793494	88793857	Nrp (-8709), Snw1 (+19573)
Dam-NKX2-5_1530	chr14	21745022	21745309	Vcl (-3489)
Dam-NKX2-5_1531	chr5	20876570	20877230	Fgl2 (-1591)
Dam-NKX2-5_1532	chr3	51024002	51024301	Ccrn4l (-4217)
Dam-NKX2-5_1533	chr2	62482701	62483322	Ifih1 (+1300)
Dam-NKX2-5_1534	chr4	118965022	118965358	Ybx1 (+1928)

## Sheet: 2 - Dam-NKX2-5Y191C
peak	chromosome	start	end
Dam-NKX2-5Y191C_1	chr13	38241238	38243070
Dam-NKX2-5Y191C_2	chr4	119088788	119090872
Dam-NKX2-5Y191C_3	chr5	73791321	73792026
Dam-NKX2-5Y191C_4	chr19	34826840	34827555
Dam-NKX2-5Y191C_5	chr12	53980051	53981532
Dam-NKX2-5Y191C_6	chr6	30519812	30520847
Dam-NKX2-5Y191C_7	chr8	59310796	59311671
Dam-NKX2-5Y191C_8	chr13	23837345	23837850
Dam-NKX2-5Y191C_9	chr15	35598635	35599622
Dam-NKX2-5Y191C_10	chr4	125745081	125745338
Dam-NKX2-5Y191C_11	chr7	128218018	128218511
Dam-NKX2-5Y191C_12	chr3	117569169	117570616
Dam-NKX2-5Y191C_13	chr3	85354817	85356034
Dam-NKX2-5Y191C_14	chr7	28645214	28645472
Dam-NKX2-5Y191C_15	chr3	32718727	32719008
Dam-NKX2-5Y191C_16	chr11	65549377	65550646
Dam-NKX2-5Y191C_17	chr8	109818685	109819648
Dam-NKX2-5Y191C_18	chr8	42220387	42221109
Dam-NKX2-5Y191C_19	chr6	120937301	120938542
Dam-NKX2-5Y191C_20	chr19	4940750	4941447
Dam-NKX2-5Y191C_21	chr9	90059034	90060506
Dam-NKX2-5Y191C_22	chr6	17581568	17581966
Dam-NKX2-5Y191C_23	chr2	76819747	76822303
Dam-NKX2-5Y191C_24	chr11	83284797	83286141
Dam-NKX2-5Y191C_25	chr5	116899566	116901971
Dam-NKX2-5Y191C_26	chr17	78597025	78598378
Dam-NKX2-5Y191C_27	chr2	18914920	18916174
Dam-NKX2-5Y191C_28	chr12	16899903	16900939
Dam-NKX2-5Y191C_29	chr1	58086068	58088320
Dam-NKX2-5Y191C_30	chr12	41615292	41615849
Dam-NKX2-5Y191C_31	chr11	98255714	98256542
Dam-NKX2-5Y191C_32	chr9	111336464	111338016
Dam-NKX2-5Y191C_33	chr11	62943525	62944454
Dam-NKX2-5Y191C_34	chr6	119146220	119147520
Dam-NKX2-5Y191C_35	chr2	13478963	13479600
Dam-NKX2-5Y191C_36	chr12	5382681	5383108
Dam-NKX2-5Y191C_37	chr1	79856564	79857268
Dam-NKX2-5Y191C_38	chr5	151096600	151098187
Dam-NKX2-5Y191C_39	chr3	126301075	126302401
Dam-NKX2-5Y191C_40	chr6	54941556	54942242
Dam-NKX2-5Y191C_41	chr11	6342670	6343433
Dam-NKX2-5Y191C_42	chr4	131631467	131632534
Dam-NKX2-5Y191C_43	chr11	58595679	58596868
Dam-NKX2-5Y191C_44	chr8	42198760	42200658
Dam-NKX2-5Y191C_45	chr4	131864200	131864926
Dam-NKX2-5Y191C_46	chr12	25393699	25394346
Dam-NKX2-5Y191C_47	chr6	13555961	13557579
Dam-NKX2-5Y191C_48	chr5	144379160	144379694
Dam-NKX2-5Y191C_49	chr1	162965910	162967243
Dam-NKX2-5Y191C_50	chr17	26980398	26981852
Dam-NKX2-5Y191C_51	chr19	10113149	10114087
Dam-NKX2-5Y191C_52	chr4	97446046	97446822
Dam-NKX2-5Y191C_53	chr1	134207494	134208949
Dam-NKX2-5Y191C_54	chr12	25782343	25783461
Dam-NKX2-5Y191C_55	chr9	99143047	99144197
Dam-NKX2-5Y191C_56	chr7	119897819	119899143
Dam-NKX2-5Y191C_57	chr1	46465353	46465736
Dam-NKX2-5Y191C_58	chr14	102193811	102195263
Dam-NKX2-5Y191C_59	chr7	119368091	119368776
Dam-NKX2-5Y191C_60	chr19	56463346	56464310
Dam-NKX2-5Y191C_61	chr4	133959669	133960001
Dam-NKX2-5Y191C_62	chrX	154135392	154137253
Dam-NKX2-5Y191C_63	chr6	57484777	57486031
Dam-NKX2-5Y191C_64	chr6	118078658	118079277
Dam-NKX2-5Y191C_65	chr4	135698327	135699332
Dam-NKX2-5Y191C_66	chr13	118389660	118390578
Dam-NKX2-5Y191C_67	chr2	19473803	19474782
Dam-NKX2-5Y191C_68	chr15	81976480	81977135
Dam-NKX2-5Y191C_69	chr17	27993848	27994619
Dam-NKX2-5Y191C_70	chr6	38497188	38497822
Dam-NKX2-5Y191C_71	chr19	29772326	29773319
Dam-NKX2-5Y191C_72	chr9	44226345	44227214
Dam-NKX2-5Y191C_73	chr7	96781218	96781835
Dam-NKX2-5Y191C_74	chr15	40488244	40488799
Dam-NKX2-5Y191C_75	chr3	32717830	32718293
Dam-NKX2-5Y191C_76	chr17	33167978	33168265
Dam-NKX2-5Y191C_77	chr2	38144774	38145675
Dam-NKX2-5Y191C_78	chr11	66724357	66725081
Dam-NKX2-5Y191C_79	chr10	62922093	62922733
Dam-NKX2-5Y191C_80	chr12	77635666	77636242
Dam-NKX2-5Y191C_81	chr7	30980187	30981684
Dam-NKX2-5Y191C_82	chr15	80747508	80747814
Dam-NKX2-5Y191C_83	chr2	73223158	73223808
Dam-NKX2-5Y191C_84	chr17	85355997	85356819
Dam-NKX2-5Y191C_85	chr18	42211205	42211979
Dam-NKX2-5Y191C_86	chr5	43630407	43631279
Dam-NKX2-5Y191C_87	chr5	73558435	73559245
Dam-NKX2-5Y191C_88	chr7	80691147	80691728
Dam-NKX2-5Y191C_89	chr1	43208142	43211838
Dam-NKX2-5Y191C_90	chr17	33917118	33917829
Dam-NKX2-5Y191C_91	chr16	4079183	4080864
Dam-NKX2-5Y191C_92	chr2	119796546	119797453
Dam-NKX2-5Y191C_93	chr3	60335074	60335477
Dam-NKX2-5Y191C_94	chr13	12561738	12562217
Dam-NKX2-5Y191C_95	chr14	31307665	31308953
Dam-NKX2-5Y191C_96	chr17	89026805	89027315
Dam-NKX2-5Y191C_97	chr3	122688778	122689282
Dam-NKX2-5Y191C_98	chr2	76766978	76767496
Dam-NKX2-5Y191C_99	chr5	44167951	44168497
Dam-NKX2-5Y191C_100	chr5	138161569	138161961
Dam-NKX2-5Y191C_101	chr2	17980340	17980915
Dam-NKX2-5Y191C_102	chr12	120085884	120086443
Dam-NKX2-5Y191C_103	chr15	98782262	98782801
Dam-NKX2-5Y191C_104	chr3	116669484	116670717
Dam-NKX2-5Y191C_105	chr12	100137200	100137533
Dam-NKX2-5Y191C_106	chr6	71634434	71635034
Dam-NKX2-5Y191C_107	chr9	24582319	24583034
Dam-NKX2-5Y191C_108	chr8	64464842	64465165
Dam-NKX2-5Y191C_109	chr3	84389839	84390572
Dam-NKX2-5Y191C_110	chr6	36467236	36467525
Dam-NKX2-5Y191C_111	chr6	83781686	83782223
Dam-NKX2-5Y191C_112	chr13	33054212	33054957
Dam-NKX2-5Y191C_113	chr10	24314886	24315374
Dam-NKX2-5Y191C_114	chr7	96669982	96670537
Dam-NKX2-5Y191C_115	chr16	10411590	10412021
Dam-NKX2-5Y191C_116	chr18	60765910	60766745
Dam-NKX2-5Y191C_117	chr4	81842140	81844805
Dam-NKX2-5Y191C_118	chr4	131978546	131978938
Dam-NKX2-5Y191C_119	chr6	24551250	24552423
Dam-NKX2-5Y191C_120	chr4	53258650	53259700
Dam-NKX2-5Y191C_121	chr10	116481312	116482612
Dam-NKX2-5Y191C_122	chr15	54944190	54944831
Dam-NKX2-5Y191C_123	chr18	37965333	37965810
Dam-NKX2-5Y191C_124	chr2	69509946	69510794
Dam-NKX2-5Y191C_125	chr2	77011771	77012818
Dam-NKX2-5Y191C_126	chr7	149642611	149643834
Dam-NKX2-5Y191C_127	chr9	66363094	66363730
Dam-NKX2-5Y191C_128	chr3	40603315	40603859
Dam-NKX2-5Y191C_129	chr1	74047608	74048332
Dam-NKX2-5Y191C_130	chr5	74593012	74593486
Dam-NKX2-5Y191C_131	chr15	103072002	103073010
Dam-NKX2-5Y191C_132	chr17	43939667	43941620
Dam-NKX2-5Y191C_133	chr16	98178650	98179454
Dam-NKX2-5Y191C_134	chr8	130881479	130882366
Dam-NKX2-5Y191C_135	chr15	62053742	62054677
Dam-NKX2-5Y191C_136	chr10	66687839	66688515
Dam-NKX2-5Y191C_137	chr8	25549531	25550037
Dam-NKX2-5Y191C_138	chr19	31836839	31837773
Dam-NKX2-5Y191C_139	chr14	22315627	22317374
Dam-NKX2-5Y191C_140	chr1	140516520	140517034
Dam-NKX2-5Y191C_141	chr2	68701623	68702071
Dam-NKX2-5Y191C_142	chr6	51278250	51278898
Dam-NKX2-5Y191C_143	chr10	87964735	87965211
Dam-NKX2-5Y191C_144	chr3	122689675	122690040
Dam-NKX2-5Y191C_145	chr5	77375365	77377490
Dam-NKX2-5Y191C_146	chr17	3114169	3114693
Dam-NKX2-5Y191C_147	chr3	122816805	122817659
Dam-NKX2-5Y191C_148	chr4	99380303	99381387
Dam-NKX2-5Y191C_149	chr11	78642176	78642517
Dam-NKX2-5Y191C_150	chr8	46743171	46745216
Dam-NKX2-5Y191C_151	chr6	116365115	116365406
Dam-NKX2-5Y191C_152	chr7	116761322	116762431
Dam-NKX2-5Y191C_153	chr9	45792987	45793652
Dam-NKX2-5Y191C_154	chr2	90958318	90959855
Dam-NKX2-5Y191C_155	chr19	10052388	10053223
Dam-NKX2-5Y191C_156	chr3	19853247	19855365
Dam-NKX2-5Y191C_157	chr15	38763142	38764898
Dam-NKX2-5Y191C_158	chr12	55897737	55898124
Dam-NKX2-5Y191C_159	chr2	75817596	75817988
Dam-NKX2-5Y191C_160	chr11	8946344	8947205
Dam-NKX2-5Y191C_161	chr17	66296599	66297423
Dam-NKX2-5Y191C_162	chr8	79975200	79975809
Dam-NKX2-5Y191C_163	chr1	20910348	20911307
Dam-NKX2-5Y191C_164	chr8	80248677	80249459
Dam-NKX2-5Y191C_165	chr3	105701943	105702491
Dam-NKX2-5Y191C_166	chr8	67213819	67214116
Dam-NKX2-5Y191C_167	chr10	96080439	96081121
Dam-NKX2-5Y191C_168	chr17	32924930	32925508
Dam-NKX2-5Y191C_169	chr17	49962984	49965605
Dam-NKX2-5Y191C_170	chr17	5117369	5118078
Dam-NKX2-5Y191C_171	chr9	44142337	44142879
Dam-NKX2-5Y191C_172	chr11	5665343	5665673
Dam-NKX2-5Y191C_173	chr16	24394910	24395634
Dam-NKX2-5Y191C_174	chr7	117762209	117764102
Dam-NKX2-5Y191C_175	chr16	34994418	34994983
Dam-NKX2-5Y191C_176	chr16	22168707	22169033
Dam-NKX2-5Y191C_177	chr14	61876291	61878556
Dam-NKX2-5Y191C_178	chr17	72129773	72131551
Dam-NKX2-5Y191C_179	chr4	11083838	11084774
Dam-NKX2-5Y191C_180	chr19	57272714	57273764
Dam-NKX2-5Y191C_181	chrX	92673527	92674225
Dam-NKX2-5Y191C_182	chr7	142888485	142890858
Dam-NKX2-5Y191C_183	chr6	91160877	91161823
Dam-NKX2-5Y191C_184	chr1	66860642	66861309
Dam-NKX2-5Y191C_185	chr14	22645034	22645278
Dam-NKX2-5Y191C_186	chr12	46176373	46177169
Dam-NKX2-5Y191C_187	chr1	9620243	9621684
Dam-NKX2-5Y191C_188	chr13	104711805	104712457
Dam-NKX2-5Y191C_189	chr11	59424939	59425947
Dam-NKX2-5Y191C_190	chr1	181476995	181477693
Dam-NKX2-5Y191C_191	chr6	34546875	34547463
Dam-NKX2-5Y191C_192	chr3	122690770	122692237
Dam-NKX2-5Y191C_193	chr13	12291363	12292293
Dam-NKX2-5Y191C_194	chr6	134872354	134873170
Dam-NKX2-5Y191C_195	chr4	132069170	132070193
Dam-NKX2-5Y191C_196	chr12	73636615	73637402
Dam-NKX2-5Y191C_197	chr18	60763348	60764430
Dam-NKX2-5Y191C_198	chr10	107770560	107771257
Dam-NKX2-5Y191C_199	chr9	22233766	22234424
Dam-NKX2-5Y191C_200	chr18	39029396	39030224
Dam-NKX2-5Y191C_201	chr12	85626785	85627486
Dam-NKX2-5Y191C_202	chr1	66990973	66991321
Dam-NKX2-5Y191C_203	chr5	72893807	72894940
Dam-NKX2-5Y191C_204	chr8	37674471	37674751
Dam-NKX2-5Y191C_205	chr12	52794939	52795531
Dam-NKX2-5Y191C_206	chr12	8927464	8928823
Dam-NKX2-5Y191C_207	chr14	32251178	32251657
Dam-NKX2-5Y191C_208	chr3	57377581	57378554
Dam-NKX2-5Y191C_209	chr16	91546384	91547052
Dam-NKX2-5Y191C_210	chr13	101550981	101551549
Dam-NKX2-5Y191C_211	chr10	84296259	84297262
Dam-NKX2-5Y191C_212	chr3	105674989	105675466
Dam-NKX2-5Y191C_213	chr1	154470671	154471367
Dam-NKX2-5Y191C_214	chr2	113876154	113877262
Dam-NKX2-5Y191C_215	chr3	100486825	100487349
Dam-NKX2-5Y191C_216	chr2	113879765	113880908
Dam-NKX2-5Y191C_217	chr1	155151848	155152622
Dam-NKX2-5Y191C_218	chr5	151995992	151996990
Dam-NKX2-5Y191C_219	chr12	75005851	75006326
Dam-NKX2-5Y191C_220	chr11	88717974	88718789
Dam-NKX2-5Y191C_221	chr7	117912989	117913565
Dam-NKX2-5Y191C_222	chr15	102503081	102504532
Dam-NKX2-5Y191C_223	chr3	107889584	107890271
Dam-NKX2-5Y191C_224	chr7	118129172	118130041
Dam-NKX2-5Y191C_225	chr4	109331433	109331898
Dam-NKX2-5Y191C_226	chr2	51004690	51005722
Dam-NKX2-5Y191C_227	chr9	24579144	24580368
Dam-NKX2-5Y191C_228	chrX	166417750	166418529
Dam-NKX2-5Y191C_229	chr3	145884805	145885353
Dam-NKX2-5Y191C_230	chr5	51942572	51943836
Dam-NKX2-5Y191C_231	chr17	75864300	75864908
Dam-NKX2-5Y191C_232	chr4	135866136	135866832
Dam-NKX2-5Y191C_233	chr11	62946765	62947198
Dam-NKX2-5Y191C_234	chr7	116689477	116690832
Dam-NKX2-5Y191C_235	chr16	36041973	36043331
Dam-NKX2-5Y191C_236	chr12	77895811	77896269
Dam-NKX2-5Y191C_237	chr17	14833672	14834389
Dam-NKX2-5Y191C_238	chr14	46090687	46091363
Dam-NKX2-5Y191C_239	chr7	91096682	91097252
Dam-NKX2-5Y191C_240	chr9	20957288	20957830
Dam-NKX2-5Y191C_241	chr16	43763464	43764160
Dam-NKX2-5Y191C_242	chr13	94078939	94079635
Dam-NKX2-5Y191C_243	chr1	52770711	52771302
Dam-NKX2-5Y191C_244	chr12	106795715	106796373
Dam-NKX2-5Y191C_245	chr5	76372449	76373020
Dam-NKX2-5Y191C_246	chr9	44580639	44580970
Dam-NKX2-5Y191C_247	chr18	46519733	46520626
Dam-NKX2-5Y191C_248	chr7	119167785	119169399
Dam-NKX2-5Y191C_249	chr10	45590792	45591371
Dam-NKX2-5Y191C_250	chr2	118512519	118513028
Dam-NKX2-5Y191C_251	chr10	62918092	62918754
Dam-NKX2-5Y191C_252	chr1	79666049	79666757
Dam-NKX2-5Y191C_253	chr5	122959806	122960912
Dam-NKX2-5Y191C_254	chr12	75010354	75010847
Dam-NKX2-5Y191C_255	chr5	8798608	8798962
Dam-NKX2-5Y191C_256	chr18	55149763	55150873
Dam-NKX2-5Y191C_257	chr14	17406498	17407644
Dam-NKX2-5Y191C_258	chr13	23775664	23776073
Dam-NKX2-5Y191C_259	chr3	88550618	88551298
Dam-NKX2-5Y191C_260	chr4	45333480	45333919
Dam-NKX2-5Y191C_261	chrX	166414833	166415396
Dam-NKX2-5Y191C_262	chr4	55018234	55019099
Dam-NKX2-5Y191C_263	chr1	66981632	66983654
Dam-NKX2-5Y191C_264	chr12	86338370	86338804
Dam-NKX2-5Y191C_265	chr12	41168367	41168773
Dam-NKX2-5Y191C_266	chr2	72466238	72466739
Dam-NKX2-5Y191C_267	chr9	59136835	59137523
Dam-NKX2-5Y191C_268	chr3	30895521	30895845
Dam-NKX2-5Y191C_269	chr6	135314199	135314675
Dam-NKX2-5Y191C_270	chr12	106248650	106249469
Dam-NKX2-5Y191C_271	chr1	133241974	133242490
Dam-NKX2-5Y191C_272	chr10	92624859	92625464
Dam-NKX2-5Y191C_273	chr1	77057651	77059307
Dam-NKX2-5Y191C_274	chr11	120982809	120983140
Dam-NKX2-5Y191C_275	chr9	41036438	41037423
Dam-NKX2-5Y191C_276	chr6	38790323	38790920
Dam-NKX2-5Y191C_277	chr6	149086240	149086753
Dam-NKX2-5Y191C_278	chr10	82321491	82322159
Dam-NKX2-5Y191C_279	chr6	51282890	51284678
Dam-NKX2-5Y191C_280	chr1	180185381	180186454
Dam-NKX2-5Y191C_281	chr16	28750784	28751249
Dam-NKX2-5Y191C_282	chr6	86798791	86799406
Dam-NKX2-5Y191C_283	chr4	150284061	150284382
Dam-NKX2-5Y191C_284	chr6	54761730	54762796
Dam-NKX2-5Y191C_285	chr8	130880203	130880686
Dam-NKX2-5Y191C_286	chr11	6316510	6316842
Dam-NKX2-5Y191C_287	chr3	144227460	144228027
Dam-NKX2-5Y191C_288	chr13	46516010	46516558
Dam-NKX2-5Y191C_289	chr4	125724291	125724921
Dam-NKX2-5Y191C_290	chr15	42967910	42968591
Dam-NKX2-5Y191C_291	chr15	37391239	37392143
Dam-NKX2-5Y191C_292	chr1	141321775	141322334
Dam-NKX2-5Y191C_293	chr17	35841987	35842774
Dam-NKX2-5Y191C_294	chr1	9789331	9789713
Dam-NKX2-5Y191C_295	chr9	110855674	110856492
Dam-NKX2-5Y191C_296	chr11	107329799	107330558
Dam-NKX2-5Y191C_297	chr12	82049520	82050033
Dam-NKX2-5Y191C_298	chr2	69507851	69508806
Dam-NKX2-5Y191C_299	chr16	87501528	87501954
Dam-NKX2-5Y191C_300	chr13	94077852	94078453
Dam-NKX2-5Y191C_301	chr9	106182663	106183113
Dam-NKX2-5Y191C_302	chr9	50562220	50562773
Dam-NKX2-5Y191C_303	chr7	108259249	108259752
Dam-NKX2-5Y191C_304	chr14	120725051	120725449
Dam-NKX2-5Y191C_305	chr19	36193542	36195037
Dam-NKX2-5Y191C_306	chr17	5116208	5116840
Dam-NKX2-5Y191C_307	chr5	89359265	89360035
Dam-NKX2-5Y191C_308	chr19	37283505	37283911
Dam-NKX2-5Y191C_309	chr17	33897460	33897847
Dam-NKX2-5Y191C_310	chr1	60805266	60805732
Dam-NKX2-5Y191C_311	chr10	32801780	32802361
Dam-NKX2-5Y191C_312	chr2	155971529	155972037
Dam-NKX2-5Y191C_313	chr11	101524676	101525108
Dam-NKX2-5Y191C_314	chr2	113882506	113883338
Dam-NKX2-5Y191C_315	chr19	15985118	15985582
Dam-NKX2-5Y191C_316	chr3	86804579	86805048
Dam-NKX2-5Y191C_317	chr5	107717477	107717950
Dam-NKX2-5Y191C_318	chr5	139855135	139855540
Dam-NKX2-5Y191C_319	chr2	148704231	148704884
Dam-NKX2-5Y191C_320	chr3	36379626	36379961
Dam-NKX2-5Y191C_321	chr8	59308562	59308913
Dam-NKX2-5Y191C_322	chr8	15058743	15059332
Dam-NKX2-5Y191C_323	chr4	137860303	137860634
Dam-NKX2-5Y191C_324	chr6	34267555	34268180
Dam-NKX2-5Y191C_325	chr9	73778390	73779338
Dam-NKX2-5Y191C_326	chr2	153568189	153569355
Dam-NKX2-5Y191C_327	chr6	34658015	34659108
Dam-NKX2-5Y191C_328	chr4	57751226	57751833
Dam-NKX2-5Y191C_329	chr17	44272782	44273397
Dam-NKX2-5Y191C_330	chr8	67367388	67367847
Dam-NKX2-5Y191C_331	chr11	72695502	72696387
Dam-NKX2-5Y191C_332	chr11	104410721	104412045
Dam-NKX2-5Y191C_333	chr10	17516096	17517548
Dam-NKX2-5Y191C_334	chr17	32527834	32528158
Dam-NKX2-5Y191C_335	chr5	5561395	5561647
Dam-NKX2-5Y191C_336	chr14	63861090	63861985
Dam-NKX2-5Y191C_337	chr5	42235737	42236202
Dam-NKX2-5Y191C_338	chr6	113691460	113691958
Dam-NKX2-5Y191C_339	chr6	92134309	92134861
Dam-NKX2-5Y191C_340	chr11	77929517	77930049
Dam-NKX2-5Y191C_341	chr16	32446556	32447083
Dam-NKX2-5Y191C_342	chr5	149996998	149997390
Dam-NKX2-5Y191C_343	chr16	33260580	33261232
Dam-NKX2-5Y191C_344	chr13	103483067	103484045
Dam-NKX2-5Y191C_345	chr12	77808843	77809558
Dam-NKX2-5Y191C_346	chr11	58773443	58774159
Dam-NKX2-5Y191C_347	chr16	91373640	91374884
Dam-NKX2-5Y191C_348	chr7	119902710	119903280
Dam-NKX2-5Y191C_349	chr6	32399905	32401298
Dam-NKX2-5Y191C_350	chr13	102535860	102536555
Dam-NKX2-5Y191C_351	chr15	83999043	83999329
Dam-NKX2-5Y191C_352	chr4	132312717	132313416
Dam-NKX2-5Y191C_353	chr6	136805032	136805834
Dam-NKX2-5Y191C_354	chr9	64654891	64655608
Dam-NKX2-5Y191C_355	chr14	35318357	35318690
Dam-NKX2-5Y191C_356	chr5	65827580	65828780
Dam-NKX2-5Y191C_357	chr11	62545464	62546076
Dam-NKX2-5Y191C_358	chr10	128004666	128005126
Dam-NKX2-5Y191C_359	chr11	30169137	30169505
Dam-NKX2-5Y191C_360	chr2	116948241	116948848
Dam-NKX2-5Y191C_361	chr13	83711452	83711983
Dam-NKX2-5Y191C_362	chr12	76920018	76920848
Dam-NKX2-5Y191C_363	chr7	56096565	56098673
Dam-NKX2-5Y191C_364	chr11	61892368	61892997
Dam-NKX2-5Y191C_365	chr7	139763272	139763636
Dam-NKX2-5Y191C_366	chr4	109330459	109330992
Dam-NKX2-5Y191C_367	chr15	103140256	103140874
Dam-NKX2-5Y191C_368	chr2	13475710	13476511
Dam-NKX2-5Y191C_369	chr12	73185004	73185450
Dam-NKX2-5Y191C_370	chr11	60873442	60873876
Dam-NKX2-5Y191C_371	chr4	108503491	108503853
Dam-NKX2-5Y191C_372	chr12	53977778	53978682
Dam-NKX2-5Y191C_373	chr7	56503024	56503715
Dam-NKX2-5Y191C_374	chr5	43627028	43627573
Dam-NKX2-5Y191C_375	chr6	38304377	38305577
Dam-NKX2-5Y191C_376	chr15	98436907	98438024
Dam-NKX2-5Y191C_377	chr8	28372330	28373205
Dam-NKX2-5Y191C_378	chr4	33277912	33278300
Dam-NKX2-5Y191C_379	chr11	54681224	54681564
Dam-NKX2-5Y191C_380	chr19	36806679	36807042
Dam-NKX2-5Y191C_381	chr1	170359460	170360319
Dam-NKX2-5Y191C_382	chr5	144377203	144377921
Dam-NKX2-5Y191C_383	chr1	167166314	167167254
Dam-NKX2-5Y191C_384	chr1	77045574	77046078
Dam-NKX2-5Y191C_385	chr10	94785004	94786194
Dam-NKX2-5Y191C_386	chr6	134778917	134779166
Dam-NKX2-5Y191C_387	chr16	43578029	43579037
Dam-NKX2-5Y191C_388	chr12	10399622	10400045
Dam-NKX2-5Y191C_389	chr9	24576189	24577652
Dam-NKX2-5Y191C_390	chr18	15562340	15564243
Dam-NKX2-5Y191C_391	chr8	59792565	59793446
Dam-NKX2-5Y191C_392	chr19	40528860	40529853
Dam-NKX2-5Y191C_393	chr10	13216144	13216795
Dam-NKX2-5Y191C_394	chr9	117159180	117160063
Dam-NKX2-5Y191C_395	chr6	146794955	146796267
Dam-NKX2-5Y191C_396	chr11	54711089	54711518
Dam-NKX2-5Y191C_397	chr9	13630129	13630586
Dam-NKX2-5Y191C_398	chr7	123336212	123337973
Dam-NKX2-5Y191C_399	chr10	13587301	13587905
Dam-NKX2-5Y191C_400	chr10	67596905	67597933
Dam-NKX2-5Y191C_401	chr19	40530780	40531134
Dam-NKX2-5Y191C_402	chr5	91320500	91320907
Dam-NKX2-5Y191C_403	chr10	53052338	53053298
Dam-NKX2-5Y191C_404	chr8	111239936	111240329
Dam-NKX2-5Y191C_405	chr6	119126884	119127785
Dam-NKX2-5Y191C_406	chr4	115317825	115318507
Dam-NKX2-5Y191C_407	chr3	85356398	85356797
Dam-NKX2-5Y191C_408	chr3	94819529	94820168
Dam-NKX2-5Y191C_409	chr1	82763103	82764002
Dam-NKX2-5Y191C_410	chr9	20988731	20989239
Dam-NKX2-5Y191C_411	chr12	10398040	10398786
Dam-NKX2-5Y191C_412	chr4	131903406	131903918
Dam-NKX2-5Y191C_413	chr13	23635166	23636459
Dam-NKX2-5Y191C_414	chr19	29327208	29328074
Dam-NKX2-5Y191C_415	chr13	41014057	41015466
Dam-NKX2-5Y191C_416	chr19	36909816	36910536
Dam-NKX2-5Y191C_417	chr15	3701244	3701916
Dam-NKX2-5Y191C_418	chr4	11631233	11631585
Dam-NKX2-5Y191C_419	chr9	54842955	54843575
Dam-NKX2-5Y191C_420	chr6	30252160	30253027
Dam-NKX2-5Y191C_421	chr11	98634435	98634984
Dam-NKX2-5Y191C_422	chr6	54211026	54211490
Dam-NKX2-5Y191C_423	chr3	94846249	94846785
Dam-NKX2-5Y191C_424	chr1	66987361	66987831
Dam-NKX2-5Y191C_425	chr11	3273562	3274589
Dam-NKX2-5Y191C_426	chr12	88071256	88072447
Dam-NKX2-5Y191C_427	chr6	33214086	33214481
Dam-NKX2-5Y191C_428	chr4	87457215	87457688
Dam-NKX2-5Y191C_429	chr1	179725545	179726160
Dam-NKX2-5Y191C_430	chr2	119916942	119917323
Dam-NKX2-5Y191C_431	chr19	40904647	40905114
Dam-NKX2-5Y191C_432	chr9	74921413	74921880
Dam-NKX2-5Y191C_433	chr8	47295083	47295558
Dam-NKX2-5Y191C_434	chr2	28794566	28794940
Dam-NKX2-5Y191C_435	chr1	162969162	162969888
Dam-NKX2-5Y191C_436	chr1	39632415	39632870
Dam-NKX2-5Y191C_437	chrX	163647144	163647592
Dam-NKX2-5Y191C_438	chr4	41260987	41261524
Dam-NKX2-5Y191C_439	chr4	148680302	148680909
Dam-NKX2-5Y191C_440	chr9	58881616	58882218
Dam-NKX2-5Y191C_441	chr19	15999013	15999460
Dam-NKX2-5Y191C_442	chr11	55232379	55232949
Dam-NKX2-5Y191C_443	chr12	87082341	87082603
Dam-NKX2-5Y191C_444	chr14	31306257	31307297
Dam-NKX2-5Y191C_445	chr1	129765707	129766249
Dam-NKX2-5Y191C_446	chr10	107600487	107601066
Dam-NKX2-5Y191C_447	chr6	36471082	36472458
Dam-NKX2-5Y191C_448	chr3	97456162	97456492
Dam-NKX2-5Y191C_449	chr2	72124986	72125519
Dam-NKX2-5Y191C_450	chr8	37677501	37678634
Dam-NKX2-5Y191C_451	chr6	72186256	72186897
Dam-NKX2-5Y191C_452	chr4	108077675	108078457
Dam-NKX2-5Y191C_453	chr11	83280549	83281262
Dam-NKX2-5Y191C_454	chr2	59451697	59452574
Dam-NKX2-5Y191C_455	chr6	9099457	9100634
Dam-NKX2-5Y191C_456	chr1	55749418	55751069
Dam-NKX2-5Y191C_457	chr15	88850446	88851232
Dam-NKX2-5Y191C_458	chr5	73559600	73559890
Dam-NKX2-5Y191C_459	chr5	92761390	92761750
Dam-NKX2-5Y191C_460	chr3	97470164	97471781
Dam-NKX2-5Y191C_461	chr3	121745947	121746793
Dam-NKX2-5Y191C_462	chr9	96919909	96920468
Dam-NKX2-5Y191C_463	chr4	57583266	57583590
Dam-NKX2-5Y191C_464	chr11	65982071	65982612
Dam-NKX2-5Y191C_465	chr6	38382843	38383163
Dam-NKX2-5Y191C_466	chr3	146069029	146069287
Dam-NKX2-5Y191C_467	chr4	84531274	84531848
Dam-NKX2-5Y191C_468	chr4	104780492	104781305
Dam-NKX2-5Y191C_469	chr19	57270921	57271351
Dam-NKX2-5Y191C_470	chr1	77059741	77060393
Dam-NKX2-5Y191C_471	chr9	94436584	94437000
Dam-NKX2-5Y191C_472	chr18	24872105	24872562
Dam-NKX2-5Y191C_473	chr2	164688160	164688498
Dam-NKX2-5Y191C_474	chr2	14527306	14528377
Dam-NKX2-5Y191C_475	chr3	65188057	65189715
Dam-NKX2-5Y191C_476	chr8	23591316	23591997
Dam-NKX2-5Y191C_477	chr17	82079575	82080032
Dam-NKX2-5Y191C_478	chr9	69303107	69304799
Dam-NKX2-5Y191C_479	chr4	131829761	131830223
Dam-NKX2-5Y191C_480	chr11	54252233	54252687
Dam-NKX2-5Y191C_481	chr4	99496309	99496632
Dam-NKX2-5Y191C_482	chr12	88289098	88289952
Dam-NKX2-5Y191C_483	chr9	103266086	103266465
Dam-NKX2-5Y191C_484	chr4	14166588	14167323
Dam-NKX2-5Y191C_485	chr10	120197085	120197983
Dam-NKX2-5Y191C_486	chr6	135312164	135312800
Dam-NKX2-5Y191C_487	chr8	128189943	128190318
Dam-NKX2-5Y191C_488	chr4	120072754	120073089
Dam-NKX2-5Y191C_489	chrX	33652961	33653635
Dam-NKX2-5Y191C_490	chr3	96024750	96025225
Dam-NKX2-5Y191C_491	chr11	67051888	67052327
Dam-NKX2-5Y191C_492	chr8	129118729	129119460
Dam-NKX2-5Y191C_493	chr15	99553619	99554895
Dam-NKX2-5Y191C_494	chr19	37288291	37288707
Dam-NKX2-5Y191C_495	chrX	160877963	160878482
Dam-NKX2-5Y191C_496	chr13	23662890	23663286
Dam-NKX2-5Y191C_497	chr18	20533454	20533899
Dam-NKX2-5Y191C_498	chr18	20712067	20712754
Dam-NKX2-5Y191C_499	chr11	4082376	4082856
Dam-NKX2-5Y191C_500	chr16	91548520	91549335
Dam-NKX2-5Y191C_501	chr10	62920509	62921643
Dam-NKX2-5Y191C_502	chr8	47575180	47575976
Dam-NKX2-5Y191C_503	chr17	17762540	17762897
Dam-NKX2-5Y191C_504	chr5	24602626	24602942
Dam-NKX2-5Y191C_505	chrX	154035430	154035829
Dam-NKX2-5Y191C_506	chr11	65081185	65084085
Dam-NKX2-5Y191C_507	chr13	12197400	12198151
Dam-NKX2-5Y191C_508	chr13	49439183	49439439
Dam-NKX2-5Y191C_509	chr7	80518865	80519474
Dam-NKX2-5Y191C_510	chr17	80459590	80460396
Dam-NKX2-5Y191C_511	chr18	42356870	42357158
Dam-NKX2-5Y191C_512	chr1	43590538	43592599
Dam-NKX2-5Y191C_513	chr6	135301954	135302561
Dam-NKX2-5Y191C_514	chr7	88489111	88489550
Dam-NKX2-5Y191C_515	chr18	35720831	35721221
Dam-NKX2-5Y191C_516	chr19	34330246	34330718
Dam-NKX2-5Y191C_517	chr12	70474551	70475367
Dam-NKX2-5Y191C_518	chr19	11000748	11001000
Dam-NKX2-5Y191C_519	chr6	113674065	113674557
Dam-NKX2-5Y191C_520	chr5	73308044	73308404
Dam-NKX2-5Y191C_521	chr17	87154845	87155167
Dam-NKX2-5Y191C_522	chr1	193195744	193196671
Dam-NKX2-5Y191C_523	chr16	4727142	4727603
Dam-NKX2-5Y191C_524	chr19	10251377	10252139
Dam-NKX2-5Y191C_525	chr4	46068083	46068640
Dam-NKX2-5Y191C_526	chr15	3944718	3945219
Dam-NKX2-5Y191C_527	chr16	14705707	14706251
Dam-NKX2-5Y191C_528	chrX	8849206	8849572
Dam-NKX2-5Y191C_529	chr12	53976885	53977468
Dam-NKX2-5Y191C_530	chr16	38361373	38362107
Dam-NKX2-5Y191C_531	chr6	9097446	9098495
Dam-NKX2-5Y191C_532	chr19	8890340	8890588
Dam-NKX2-5Y191C_533	chr8	64382212	64382525
Dam-NKX2-5Y191C_534	chr9	44113700	44114135
Dam-NKX2-5Y191C_535	chr8	3515903	3516231
Dam-NKX2-5Y191C_536	chr3	108166508	108166959
Dam-NKX2-5Y191C_537	chr4	132091194	132091582
Dam-NKX2-5Y191C_538	chr1	60860000	60860719
Dam-NKX2-5Y191C_539	chr16	17132331	17132924
Dam-NKX2-5Y191C_540	chr7	106505192	106505885
Dam-NKX2-5Y191C_541	chr12	103368522	103368892
Dam-NKX2-5Y191C_542	chr17	26848233	26848687
Dam-NKX2-5Y191C_543	chr14	21875136	21875413
Dam-NKX2-5Y191C_544	chr19	34954344	34955513
Dam-NKX2-5Y191C_545	chr6	113555208	113555527
Dam-NKX2-5Y191C_546	chr1	183771305	183771776
Dam-NKX2-5Y191C_547	chr18	3509218	3509788
Dam-NKX2-5Y191C_548	chr8	64381160	64381609
Dam-NKX2-5Y191C_549	chr16	91378150	91378483
Dam-NKX2-5Y191C_550	chr1	43240886	43241392
Dam-NKX2-5Y191C_551	chr1	183952165	183952671
Dam-NKX2-5Y191C_552	chr6	87994349	87994754
Dam-NKX2-5Y191C_553	chr9	88332426	88333031
Dam-NKX2-5Y191C_554	chr1	44273667	44274165
Dam-NKX2-5Y191C_555	chr5	120255762	120257288
Dam-NKX2-5Y191C_556	chr7	74793461	74793762
Dam-NKX2-5Y191C_557	chr4	13670807	13671393
Dam-NKX2-5Y191C_558	chr15	81636118	81636888
Dam-NKX2-5Y191C_559	chr11	82927185	82927970
Dam-NKX2-5Y191C_560	chr3	27053431	27054326
Dam-NKX2-5Y191C_561	chr1	137733505	137733982
Dam-NKX2-5Y191C_562	chr19	10053522	10053923
Dam-NKX2-5Y191C_563	chr18	6133395	6133754
Dam-NKX2-5Y191C_564	chr6	24549694	24550334
Dam-NKX2-5Y191C_565	chr4	133958312	133959121
Dam-NKX2-5Y191C_566	chr7	25290710	25291177
Dam-NKX2-5Y191C_567	chr1	135554759	135555070
Dam-NKX2-5Y191C_568	chr9	59138279	59138665
Dam-NKX2-5Y191C_569	chr11	62459560	62460495
Dam-NKX2-5Y191C_570	chr12	73634925	73635165
Dam-NKX2-5Y191C_571	chr10	82276621	82277285
Dam-NKX2-5Y191C_572	chr8	26865134	26865654
Dam-NKX2-5Y191C_573	chr8	106920165	106920868
Dam-NKX2-5Y191C_574	chr12	35734074	35734334
Dam-NKX2-5Y191C_575	chr14	47441100	47441609
Dam-NKX2-5Y191C_576	chr4	125866889	125867403
Dam-NKX2-5Y191C_577	chr3	51221164	51221422
Dam-NKX2-5Y191C_578	chr18	14133548	14134203
Dam-NKX2-5Y191C_579	chr5	139474869	139475546
Dam-NKX2-5Y191C_580	chr7	141916650	141917697
Dam-NKX2-5Y191C_581	chr4	108506998	108507144
Dam-NKX2-5Y191C_582	chr18	16968345	16968688
Dam-NKX2-5Y191C_583	chr4	134483708	134484418
Dam-NKX2-5Y191C_584	chr11	79065687	79066426
Dam-NKX2-5Y191C_585	chr11	109510946	109511500
Dam-NKX2-5Y191C_586	chr12	81218219	81218537
Dam-NKX2-5Y191C_587	chr4	133227743	133228341
Dam-NKX2-5Y191C_588	chr5	93237439	93237899
Dam-NKX2-5Y191C_589	chr15	98862778	98863259
Dam-NKX2-5Y191C_590	chr2	77007832	77008233
Dam-NKX2-5Y191C_591	chr9	69862340	69862861
Dam-NKX2-5Y191C_592	chr2	156003914	156004295
Dam-NKX2-5Y191C_593	chrX	156574104	156574884
Dam-NKX2-5Y191C_594	chr4	108672510	108673077
Dam-NKX2-5Y191C_595	chr13	23626855	23627280
Dam-NKX2-5Y191C_596	chr19	53331678	53332238
Dam-NKX2-5Y191C_597	chr5	25267951	25268291
Dam-NKX2-5Y191C_598	chr11	66035929	66036360
Dam-NKX2-5Y191C_599	chr9	15113930	15114644
Dam-NKX2-5Y191C_600	chr11	97140226	97140604
Dam-NKX2-5Y191C_601	chr2	156023079	156023765
Dam-NKX2-5Y191C_602	chr9	73782597	73782895
Dam-NKX2-5Y191C_603	chr9	77955225	77955687
Dam-NKX2-5Y191C_604	chr4	115320640	115320991
Dam-NKX2-5Y191C_605	chr4	149329962	149330624
Dam-NKX2-5Y191C_606	chr4	131909386	131910164
Dam-NKX2-5Y191C_607	chr10	12841094	12841411
Dam-NKX2-5Y191C_608	chr9	50549568	50549888
Dam-NKX2-5Y191C_609	chr9	42912764	42913277
Dam-NKX2-5Y191C_610	chr4	151669651	151669924
Dam-NKX2-5Y191C_611	chr4	131983425	131984119
Dam-NKX2-5Y191C_612	chr3	37541037	37541342
Dam-NKX2-5Y191C_613	chr18	43554179	43554536
Dam-NKX2-5Y191C_614	chr10	128025664	128026009
Dam-NKX2-5Y191C_615	chr9	57610157	57610609
Dam-NKX2-5Y191C_616	chr2	164280570	164281407
Dam-NKX2-5Y191C_617	chr15	57712335	57713057
Dam-NKX2-5Y191C_618	chr15	58241540	58242363
Dam-NKX2-5Y191C_619	chr11	18918038	18918427
Dam-NKX2-5Y191C_620	chr2	68700121	68700568
Dam-NKX2-5Y191C_621	chr7	96660257	96660554
Dam-NKX2-5Y191C_622	chr12	85702453	85702940
Dam-NKX2-5Y191C_623	chr18	13532286	13532890
Dam-NKX2-5Y191C_624	chr7	119900225	119900667
Dam-NKX2-5Y191C_625	chr10	87321727	87322008
Dam-NKX2-5Y191C_626	chr2	77010184	77010802
Dam-NKX2-5Y191C_627	chr13	38294006	38294723
Dam-NKX2-5Y191C_628	chr6	145882379	145883234
Dam-NKX2-5Y191C_629	chr6	72847953	72848292
Dam-NKX2-5Y191C_630	chr15	83424783	83425440
Dam-NKX2-5Y191C_631	chr17	27758801	27759335
Dam-NKX2-5Y191C_632	chr4	43741899	43742383
Dam-NKX2-5Y191C_633	chr13	105078253	105078746
Dam-NKX2-5Y191C_634	chr8	59806983	59807567
Dam-NKX2-5Y191C_635	chr16	96422874	96423559
Dam-NKX2-5Y191C_636	chr6	71635394	71635825
Dam-NKX2-5Y191C_637	chr6	5334290	5334625
Dam-NKX2-5Y191C_638	chr1	136915840	136917975
Dam-NKX2-5Y191C_639	chr11	54673841	54674593
Dam-NKX2-5Y191C_640	chr11	47190330	47191757
Dam-NKX2-5Y191C_641	chr6	146725312	146725811
Dam-NKX2-5Y191C_642	chr11	65546689	65546988
Dam-NKX2-5Y191C_643	chr16	49698491	49698956
Dam-NKX2-5Y191C_644	chr11	90111359	90112499
Dam-NKX2-5Y191C_645	chr10	116385782	116386636
Dam-NKX2-5Y191C_646	chr4	40798517	40800478
Dam-NKX2-5Y191C_647	chr18	35718625	35718942
Dam-NKX2-5Y191C_648	chr11	95171807	95172196
Dam-NKX2-5Y191C_649	chr4	86316603	86316838
Dam-NKX2-5Y191C_650	chr4	123589891	123590426
Dam-NKX2-5Y191C_651	chr11	79807703	79808025
Dam-NKX2-5Y191C_652	chr14	21515313	21515851
Dam-NKX2-5Y191C_653	chr10	32803168	32803803
Dam-NKX2-5Y191C_654	chr6	36473046	36473905
Dam-NKX2-5Y191C_655	chr15	66649858	66650214
Dam-NKX2-5Y191C_656	chr14	35317477	35318029
Dam-NKX2-5Y191C_657	chr2	131732013	131732302
Dam-NKX2-5Y191C_658	chr4	132071379	132071702
Dam-NKX2-5Y191C_659	chr8	81582924	81583237
Dam-NKX2-5Y191C_660	chr5	92237328	92237827
Dam-NKX2-5Y191C_661	chr17	82137653	82138195
Dam-NKX2-5Y191C_662	chr16	17235381	17235740
Dam-NKX2-5Y191C_663	chr10	75058533	75059074
Dam-NKX2-5Y191C_664	chr17	26976153	26976557
Dam-NKX2-5Y191C_665	chr15	58257466	58257988
Dam-NKX2-5Y191C_666	chr2	70894945	70895219
Dam-NKX2-5Y191C_667	chr4	109332779	109333044
Dam-NKX2-5Y191C_668	chr6	38072597	38073288
Dam-NKX2-5Y191C_669	chr11	90548536	90548784
Dam-NKX2-5Y191C_670	chr11	68908419	68908778
Dam-NKX2-5Y191C_671	chr10	20067324	20067644
Dam-NKX2-5Y191C_672	chr4	148036403	148036741
Dam-NKX2-5Y191C_673	chr13	46057545	46057983
Dam-NKX2-5Y191C_674	chr1	43221959	43222742
Dam-NKX2-5Y191C_675	chr2	18595670	18596004
Dam-NKX2-5Y191C_676	chr1	60866313	60867224
Dam-NKX2-5Y191C_677	chr1	9619007	9619547
Dam-NKX2-5Y191C_678	chr9	106793121	106793737
Dam-NKX2-5Y191C_679	chr3	116235914	116236394
Dam-NKX2-5Y191C_680	chr4	132732280	132732766
Dam-NKX2-5Y191C_681	chr7	132989297	132990936
Dam-NKX2-5Y191C_682	chr19	27293285	27293599
Dam-NKX2-5Y191C_683	chr19	53530685	53531264
Dam-NKX2-5Y191C_684	chr11	22735312	22735642
Dam-NKX2-5Y191C_685	chr1	153738414	153738771
Dam-NKX2-5Y191C_686	chr13	33055708	33056382
Dam-NKX2-5Y191C_687	chr11	30853346	30853602
Dam-NKX2-5Y191C_688	chr7	54101966	54102440
Dam-NKX2-5Y191C_689	chr4	133953490	133953791
Dam-NKX2-5Y191C_690	chr5	123582562	123582996
Dam-NKX2-5Y191C_691	chr16	43502892	43503208
Dam-NKX2-5Y191C_692	chr15	82184054	82184623
Dam-NKX2-5Y191C_693	chr15	97979261	97980194
Dam-NKX2-5Y191C_694	chr3	105717222	105717741
Dam-NKX2-5Y191C_695	chrX	54026930	54027180
Dam-NKX2-5Y191C_696	chr8	3676461	3676751
Dam-NKX2-5Y191C_697	chr7	88999311	88999962
Dam-NKX2-5Y191C_698	chr15	27505151	27505510
Dam-NKX2-5Y191C_699	chr3	95237542	95237857
Dam-NKX2-5Y191C_700	chr19	29141804	29142085
Dam-NKX2-5Y191C_701	chr16	16215447	16215884
Dam-NKX2-5Y191C_702	chr6	14708201	14708611
Dam-NKX2-5Y191C_703	chr16	35768168	35768416
Dam-NKX2-5Y191C_704	chr12	99976466	99976987
Dam-NKX2-5Y191C_705	chr2	178147614	178148059
Dam-NKX2-5Y191C_706	chr7	146569747	146570008
Dam-NKX2-5Y191C_707	chr4	13709850	13710171
Dam-NKX2-5Y191C_708	chr2	158594520	158594766
Dam-NKX2-5Y191C_709	chr18	74877493	74877776
Dam-NKX2-5Y191C_710	chr11	102993026	102993384
Dam-NKX2-5Y191C_711	chr16	30059206	30060300
Dam-NKX2-5Y191C_712	chr7	117914888	117915536
Dam-NKX2-5Y191C_713	chr4	150448579	150448894
Dam-NKX2-5Y191C_714	chr19	57389620	57389983
Dam-NKX2-5Y191C_715	chr15	41652137	41652574
Dam-NKX2-5Y191C_716	chr15	81795499	81795746
Dam-NKX2-5Y191C_717	chr3	65763065	65763780
Dam-NKX2-5Y191C_718	chr9	107830970	107831214
Dam-NKX2-5Y191C_719	chr19	36424329	36424647
Dam-NKX2-5Y191C_720	chr11	6423191	6423602
Dam-NKX2-5Y191C_721	chr4	88784760	88785051
Dam-NKX2-5Y191C_722	chrX	19867681	19867938
Dam-NKX2-5Y191C_723	chr1	153599229	153599768
Dam-NKX2-5Y191C_724	chr15	11831892	11832297
Dam-NKX2-5Y191C_725	chr15	80615357	80615695
Dam-NKX2-5Y191C_726	chr7	117770135	117770817
Dam-NKX2-5Y191C_727	chrX	39505071	39505827
Dam-NKX2-5Y191C_728	chrX	23271447	23271730
Dam-NKX2-5Y191C_729	chr6	38498614	38499006
Dam-NKX2-5Y191C_730	chr6	119145491	119145888
Dam-NKX2-5Y191C_731	chr2	155208419	155208896
Dam-NKX2-5Y191C_732	chr11	30673594	30674205
Dam-NKX2-5Y191C_733	chr3	137794662	137794899
Dam-NKX2-5Y191C_734	chr15	66720107	66721029
Dam-NKX2-5Y191C_735	chr6	24615934	24616294
Dam-NKX2-5Y191C_736	chr14	32247155	32248107
Dam-NKX2-5Y191C_737	chr5	5560297	5560941
Dam-NKX2-5Y191C_738	chr19	57686919	57687648
Dam-NKX2-5Y191C_739	chr7	108983922	108984161
Dam-NKX2-5Y191C_740	chr13	104968536	104969546
Dam-NKX2-5Y191C_741	chr7	75415478	75415987
Dam-NKX2-5Y191C_742	chr6	21969097	21969520
Dam-NKX2-5Y191C_743	chr6	134514604	134515054
Dam-NKX2-5Y191C_744	chr11	105452314	105452851
Dam-NKX2-5Y191C_745	chr15	8396616	8396924
Dam-NKX2-5Y191C_746	chr4	133951595	133952325
Dam-NKX2-5Y191C_747	chr14	55634019	55634349
Dam-NKX2-5Y191C_748	chr12	88283561	88283829
Dam-NKX2-5Y191C_749	chr11	45694811	45695123
Dam-NKX2-5Y191C_750	chr9	74823153	74823461
Dam-NKX2-5Y191C_751	chr14	104920810	104921248
Dam-NKX2-5Y191C_752	chr10	53068590	53069319
Dam-NKX2-5Y191C_753	chr9	42914777	42915357
Dam-NKX2-5Y191C_754	chr5	76622968	76623225
Dam-NKX2-5Y191C_755	chr9	64584127	64584377
Dam-NKX2-5Y191C_756	chr17	29628793	29629504
Dam-NKX2-5Y191C_757	chr8	111234415	111235104
Dam-NKX2-5Y191C_758	chr14	120675110	120675662
Dam-NKX2-5Y191C_759	chr4	55019546	55019980
Dam-NKX2-5Y191C_760	chr7	19750763	19751118
Dam-NKX2-5Y191C_761	chr6	54542942	54543360
Dam-NKX2-5Y191C_762	chr15	3923545	3923904
Dam-NKX2-5Y191C_763	chr3	35903333	35903792
Dam-NKX2-5Y191C_764	chr18	36354020	36354588
Dam-NKX2-5Y191C_765	chr9	79564045	79564339
Dam-NKX2-5Y191C_766	chr2	13470458	13471397
Dam-NKX2-5Y191C_767	chr2	90749894	90750152
Dam-NKX2-5Y191C_768	chr9	101098713	101099304
Dam-NKX2-5Y191C_769	chr9	45791146	45791688
Dam-NKX2-5Y191C_770	chr6	54767695	54768060
Dam-NKX2-5Y191C_771	chr4	59819777	59820375
Dam-NKX2-5Y191C_772	chr2	58417433	58417958
Dam-NKX2-5Y191C_773	chr10	32608432	32608805
Dam-NKX2-5Y191C_774	chr7	117263731	117264505
Dam-NKX2-5Y191C_775	chr3	89074100	89074351
Dam-NKX2-5Y191C_776	chr8	109860185	109860524
Dam-NKX2-5Y191C_777	chr8	109453041	109453500
Dam-NKX2-5Y191C_778	chr9	108164047	108164328
Dam-NKX2-5Y191C_779	chr19	21875988	21876683
Dam-NKX2-5Y191C_780	chr15	59036673	59037114
Dam-NKX2-5Y191C_781	chr10	87328873	87330017
Dam-NKX2-5Y191C_782	chrX	148370131	148370862
Dam-NKX2-5Y191C_783	chr17	32530048	32530295
Dam-NKX2-5Y191C_784	chr17	50645946	50646452
Dam-NKX2-5Y191C_785	chr18	64647910	64648451
Dam-NKX2-5Y191C_786	chr10	77067587	77067846
Dam-NKX2-5Y191C_787	chr2	156002623	156003103
Dam-NKX2-5Y191C_788	chr13	104898629	104898947
Dam-NKX2-5Y191C_789	chr8	71402793	71403042
Dam-NKX2-5Y191C_790	chr1	43253039	43253281
Dam-NKX2-5Y191C_791	chr12	84868698	84868994
Dam-NKX2-5Y191C_792	chr7	117768462	117768809
Dam-NKX2-5Y191C_793	chr6	128385880	128386347
Dam-NKX2-5Y191C_794	chr3	108167271	108167801
Dam-NKX2-5Y191C_795	chr15	58679389	58679758
Dam-NKX2-5Y191C_796	chr17	29410762	29411388
Dam-NKX2-5Y191C_797	chr19	56890523	56890867
Dam-NKX2-5Y191C_798	chr11	21902622	21903034
Dam-NKX2-5Y191C_799	chr19	10255632	10256188
Dam-NKX2-5Y191C_800	chr3	98567761	98568006
Dam-NKX2-5Y191C_801	chr16	43506369	43506736
Dam-NKX2-5Y191C_802	chr5	13398633	13399301
Dam-NKX2-5Y191C_803	chr7	75894517	75894881
Dam-NKX2-5Y191C_804	chr6	134515570	134515933
Dam-NKX2-5Y191C_805	chr3	40826120	40826773
Dam-NKX2-5Y191C_806	chr14	32017902	32018392
Dam-NKX2-5Y191C_807	chr1	9735948	9736371
Dam-NKX2-5Y191C_808	chr2	181229874	181230285
Dam-NKX2-5Y191C_809	chr12	16766625	16767122
Dam-NKX2-5Y191C_810	chr11	86169840	86170232
Dam-NKX2-5Y191C_811	chr15	98508722	98509115
Dam-NKX2-5Y191C_812	chr19	23732141	23732569
Dam-NKX2-5Y191C_813	chr15	3975131	3976060
Dam-NKX2-5Y191C_814	chr8	97959216	97959496
Dam-NKX2-5Y191C_815	chr8	46745731	46746192
Dam-NKX2-5Y191C_816	chr8	37708565	37709240
Dam-NKX2-5Y191C_817	chr14	21749237	21749721
Dam-NKX2-5Y191C_818	chr6	38249784	38250250
Dam-NKX2-5Y191C_819	chr5	125871841	125872163
Dam-NKX2-5Y191C_820	chr13	118392475	118393271
Dam-NKX2-5Y191C_821	chr2	76861535	76861995
Dam-NKX2-5Y191C_822	chr11	18920754	18921364
Dam-NKX2-5Y191C_823	chr10	66563336	66563813
Dam-NKX2-5Y191C_824	chr11	43647831	43648676
Dam-NKX2-5Y191C_825	chr17	43942771	43943431
Dam-NKX2-5Y191C_826	chr1	75138613	75138942
Dam-NKX2-5Y191C_827	chr13	50513598	50513844
Dam-NKX2-5Y191C_828	chr15	65627745	65628076
Dam-NKX2-5Y191C_829	chr6	114859016	114859464
Dam-NKX2-5Y191C_830	chr10	60936810	60937095
Dam-NKX2-5Y191C_831	chr7	86419025	86420247
Dam-NKX2-5Y191C_832	chr1	136914088	136914369
Dam-NKX2-5Y191C_833	chr4	5651768	5652056
Dam-NKX2-5Y191C_834	chr12	8676359	8677058
Dam-NKX2-5Y191C_835	chr15	98765306	98765637
Dam-NKX2-5Y191C_836	chr2	59447124	59447762
Dam-NKX2-5Y191C_837	chr14	8931613	8932014
Dam-NKX2-5Y191C_838	chr2	153173798	153174247
Dam-NKX2-5Y191C_839	chr4	132833918	132834268
Dam-NKX2-5Y191C_840	chr12	32896583	32896937
Dam-NKX2-5Y191C_841	chr3	94277825	94278098
Dam-NKX2-5Y191C_842	chr5	24416304	24416587
Dam-NKX2-5Y191C_843	chr7	108467183	108467546
Dam-NKX2-5Y191C_844	chr4	132066483	132066759
Dam-NKX2-5Y191C_845	chr4	101929722	101930043
Dam-NKX2-5Y191C_846	chr7	148632971	148633326
Dam-NKX2-5Y191C_847	chr2	120803761	120804283
Dam-NKX2-5Y191C_848	chr3	103541577	103541847
Dam-NKX2-5Y191C_849	chr15	43113987	43114347
Dam-NKX2-5Y191C_850	chr1	182121118	182122104
Dam-NKX2-5Y191C_851	chr1	134437591	134437921
Dam-NKX2-5Y191C_852	chr13	103484372	103484624
Dam-NKX2-5Y191C_853	chr7	54089196	54089477
Dam-NKX2-5Y191C_854	chr1	153190247	153190631
Dam-NKX2-5Y191C_855	chr10	77532203	77532524
Dam-NKX2-5Y191C_856	chr6	146726202	146726805
Dam-NKX2-5Y191C_857	chr4	108674887	108675622
Dam-NKX2-5Y191C_858	chr9	71437582	71439208
Dam-NKX2-5Y191C_859	chr3	79684014	79684923
Dam-NKX2-5Y191C_860	chr8	98333964	98334504
Dam-NKX2-5Y191C_861	chr14	32008153	32008446
Dam-NKX2-5Y191C_862	chr8	32223807	32224162
Dam-NKX2-5Y191C_863	chr3	122818768	122819238
Dam-NKX2-5Y191C_864	chr19	27285616	27285978
Dam-NKX2-5Y191C_865	chr6	149256567	149256823
Dam-NKX2-5Y191C_866	chr1	120404622	120404906
Dam-NKX2-5Y191C_867	chr9	110957812	110958132
Dam-NKX2-5Y191C_868	chr11	68407807	68408204
Dam-NKX2-5Y191C_869	chr1	45962277	45962642
Dam-NKX2-5Y191C_870	chr5	23918044	23918568
Dam-NKX2-5Y191C_871	chr8	86478948	86479573
Dam-NKX2-5Y191C_872	chr11	59406094	59406599
Dam-NKX2-5Y191C_873	chr18	61557684	61558091
Dam-NKX2-5Y191C_874	chr16	50736781	50737558
Dam-NKX2-5Y191C_875	chr7	29595024	29595493
Dam-NKX2-5Y191C_876	chr4	16095585	16096261
Dam-NKX2-5Y191C_877	chr9	22030330	22030716
Dam-NKX2-5Y191C_878	chr15	9003425	9003859
Dam-NKX2-5Y191C_879	chr5	31542661	31542948
Dam-NKX2-5Y191C_880	chr7	107436254	107436500
Dam-NKX2-5Y191C_881	chr5	96802192	96802560
Dam-NKX2-5Y191C_882	chr12	73863429	73863564
Dam-NKX2-5Y191C_883	chr1	120317890	120318182
Dam-NKX2-5Y191C_884	chr11	20444164	20444592
Dam-NKX2-5Y191C_885	chr17	71533747	71534204
Dam-NKX2-5Y191C_886	chrX	154134223	154134595
Dam-NKX2-5Y191C_887	chr12	4132196	4132711
Dam-NKX2-5Y191C_888	chr2	84489222	84489724
Dam-NKX2-5Y191C_889	chr12	79293501	79293817
Dam-NKX2-5Y191C_890	chr14	70579801	70580159
Dam-NKX2-5Y191C_891	chr5	151991307	151992090
Dam-NKX2-5Y191C_892	chr1	66859704	66860347
Dam-NKX2-5Y191C_893	chr9	106152228	106152581
Dam-NKX2-5Y191C_894	chr1	66985411	66985781
Dam-NKX2-5Y191C_895	chr6	17012540	17013189
Dam-NKX2-5Y191C_896	chrX	103123103	103123425
Dam-NKX2-5Y191C_897	chr7	119897180	119897426
Dam-NKX2-5Y191C_898	chr2	44966961	44967283
Dam-NKX2-5Y191C_899	chr11	69176024	69176458
Dam-NKX2-5Y191C_900	chr9	53344080	53344471
Dam-NKX2-5Y191C_901	chr8	109460778	109461132
Dam-NKX2-5Y191C_902	chr11	68911695	68912089
Dam-NKX2-5Y191C_903	chr4	120079313	120079706
Dam-NKX2-5Y191C_904	chr1	99993183	99993636
Dam-NKX2-5Y191C_905	chr2	71291080	71291321
Dam-NKX2-5Y191C_906	chr4	151384895	151385219
Dam-NKX2-5Y191C_907	chr4	141435810	141436065
Dam-NKX2-5Y191C_908	chr18	6136724	6136980
Dam-NKX2-5Y191C_909	chr3	37253478	37253771
Dam-NKX2-5Y191C_910	chr19	29598613	29598993
Dam-NKX2-5Y191C_911	chr12	72933210	72933537
Dam-NKX2-5Y191C_912	chr6	17687601	17687885
Dam-NKX2-5Y191C_913	chr12	92504121	92504678
Dam-NKX2-5Y191C_914	chr7	117129721	117130083
Dam-NKX2-5Y191C_915	chr11	3101704	3101955
Dam-NKX2-5Y191C_916	chr18	40412413	40412697
Dam-NKX2-5Y191C_917	chr8	65427574	65427826
Dam-NKX2-5Y191C_918	chr2	155973328	155973732
Dam-NKX2-5Y191C_919	chr1	134213681	134213989
Dam-NKX2-5Y191C_920	chr2	29929814	29930096
Dam-NKX2-5Y191C_921	chrX	166411505	166412357
Dam-NKX2-5Y191C_922	chr1	182122644	182122977
Dam-NKX2-5Y191C_923	chr16	43507312	43507680
Dam-NKX2-5Y191C_924	chr15	58052038	58052391
Dam-NKX2-5Y191C_925	chr8	112216341	112216720
Dam-NKX2-5Y191C_926	chr16	77501994	77502338
Dam-NKX2-5Y191C_927	chr3	121350180	121350426
Dam-NKX2-5Y191C_928	chr9	22194854	22195185
Dam-NKX2-5Y191C_929	chr17	82113571	82113831
Dam-NKX2-5Y191C_930	chr4	99601688	99601946
Dam-NKX2-5Y191C_931	chr4	116951844	116952608
Dam-NKX2-5Y191C_932	chr6	113420097	113420395
Dam-NKX2-5Y191C_933	chr18	65048628	65049028
Dam-NKX2-5Y191C_934	chr1	95698431	95698680
Dam-NKX2-5Y191C_935	chr6	38792780	38793174
Dam-NKX2-5Y191C_936	chr14	47990564	47991321
Dam-NKX2-5Y191C_937	chr13	53074687	53075320
Dam-NKX2-5Y191C_938	chr2	55286721	55287045
Dam-NKX2-5Y191C_939	chr13	105017794	105018520
Dam-NKX2-5Y191C_940	chr11	19819791	19820283
Dam-NKX2-5Y191C_941	chr3	121668793	121669095
Dam-NKX2-5Y191C_942	chr6	142456643	142457015
Dam-NKX2-5Y191C_943	chr2	121333358	121333975
Dam-NKX2-5Y191C_944	chr3	137805360	137805887
Dam-NKX2-5Y191C_945	chr7	123339474	123340139
Dam-NKX2-5Y191C_946	chr3	104026884	104027208
Dam-NKX2-5Y191C_947	chr1	183951197	183951752
Dam-NKX2-5Y191C_948	chr12	11275467	11275878
Dam-NKX2-5Y191C_949	chr3	79774253	79774580
Dam-NKX2-5Y191C_950	chr1	91004969	91005226
Dam-NKX2-5Y191C_951	chr3	96405899	96406195
Dam-NKX2-5Y191C_952	chr5	92933265	92933964
Dam-NKX2-5Y191C_953	chr6	24547701	24548305
Dam-NKX2-5Y191C_954	chr3	84356950	84357422
Dam-NKX2-5Y191C_955	chr3	137735876	137736217
Dam-NKX2-5Y191C_956	chr19	5848859	5849301
Dam-NKX2-5Y191C_957	chr9	88378857	88379413
Dam-NKX2-5Y191C_958	chr18	84258769	84259355
Dam-NKX2-5Y191C_959	chr11	4997483	4997826
Dam-NKX2-5Y191C_960	chr3	83845210	83845712
Dam-NKX2-5Y191C_961	chr15	78686860	78687196
Dam-NKX2-5Y191C_962	chr13	59748097	59748416
Dam-NKX2-5Y191C_963	chr1	45917046	45917371
Dam-NKX2-5Y191C_964	chrX	162608821	162609224
Dam-NKX2-5Y191C_965	chr2	180889010	180889265
Dam-NKX2-5Y191C_966	chr12	112279251	112279650
Dam-NKX2-5Y191C_967	chr9	65973899	65974207
Dam-NKX2-5Y191C_968	chr8	80134225	80134599
Dam-NKX2-5Y191C_969	chr12	83713810	83714360
Dam-NKX2-5Y191C_970	chr2	119913218	119913536
Dam-NKX2-5Y191C_971	chr10	78037914	78038315
Dam-NKX2-5Y191C_972	chr9	107137517	107137771
Dam-NKX2-5Y191C_973	chr9	107873895	107874255
Dam-NKX2-5Y191C_974	chr10	92911164	92911460
Dam-NKX2-5Y191C_975	chrX	66614433	66614728
Dam-NKX2-5Y191C_976	chr2	163469548	163469876
Dam-NKX2-5Y191C_977	chr15	66646399	66647136
Dam-NKX2-5Y191C_978	chr5	125028720	125029087
Dam-NKX2-5Y191C_979	chr11	105071409	105071688
Dam-NKX2-5Y191C_980	chr3	36761410	36761672
Dam-NKX2-5Y191C_981	chr2	17977023	17977276
Dam-NKX2-5Y191C_982	chr11	98886143	98886387
Dam-NKX2-5Y191C_983	chr9	107198113	107198486
Dam-NKX2-5Y191C_984	chr18	39082069	39083168
Dam-NKX2-5Y191C_985	chr15	57966876	57967179
Dam-NKX2-5Y191C_986	chr4	9569855	9570208
Dam-NKX2-5Y191C_987	chr4	84318440	84318695
Dam-NKX2-5Y191C_988	chr1	99657385	99657732
Dam-NKX2-5Y191C_989	chr12	66063223	66063508
Dam-NKX2-5Y191C_990	chr2	35044545	35044799
Dam-NKX2-5Y191C_991	chr12	88069859	88070180
Dam-NKX2-5Y191C_992	chr2	39080843	39081129
Dam-NKX2-5Y191C_993	chr4	106924766	106925112
Dam-NKX2-5Y191C_994	chr2	76767825	76768214
Dam-NKX2-5Y191C_995	chr16	13358781	13359154
Dam-NKX2-5Y191C_996	chr13	12290652	12291116
Dam-NKX2-5Y191C_997	chr8	122511723	122512079
Dam-NKX2-5Y191C_998	chr14	41781386	41781792
Dam-NKX2-5Y191C_999	chr13	12195342	12195891
Dam-NKX2-5Y191C_1000	chr16	43508069	43508563
Dam-NKX2-5Y191C_1001	chr8	108731366	108731686
Dam-NKX2-5Y191C_1002	chr9	44414459	44415439
Dam-NKX2-5Y191C_1003	chr7	89077897	89078152
Dam-NKX2-5Y191C_1004	chr8	108164618	108164952
Dam-NKX2-5Y191C_1005	chr9	92172291	92172702
Dam-NKX2-5Y191C_1006	chr7	50699440	50699861
Dam-NKX2-5Y191C_1007	chr11	53520065	53520473
Dam-NKX2-5Y191C_1008	chr11	23669650	23670298
Dam-NKX2-5Y191C_1009	chr12	3234375	3234735
Dam-NKX2-5Y191C_1010	chr19	28086437	28086936
Dam-NKX2-5Y191C_1011	chr6	73199815	73200371
Dam-NKX2-5Y191C_1012	chr3	144237198	144237568
Dam-NKX2-5Y191C_1013	chr3	127491777	127492371
Dam-NKX2-5Y191C_1014	chr14	77073211	77073510
Dam-NKX2-5Y191C_1015	chr2	71049373	71049695
Dam-NKX2-5Y191C_1016	chr18	14134886	14135603
Dam-NKX2-5Y191C_1017	chr6	97261417	97261746
Dam-NKX2-5Y191C_1018	chr7	81698164	81698459
Dam-NKX2-5Y191C_1019	chr4	115321781	115322102
Dam-NKX2-5Y191C_1020	chr10	128368196	128369090
Dam-NKX2-5Y191C_1021	chr4	89355961	89356376
Dam-NKX2-5Y191C_1022	chr7	97279598	97280016
Dam-NKX2-5Y191C_1023	chr2	156544229	156544695
Dam-NKX2-5Y191C_1024	chr2	60049948	60050237
Dam-NKX2-5Y191C_1025	chr14	102241591	102241844
Dam-NKX2-5Y191C_1026	chr1	59008573	59008870
Dam-NKX2-5Y191C_1027	chr1	52555855	52556366
Dam-NKX2-5Y191C_1028	chr12	56594735	56595023
Dam-NKX2-5Y191C_1029	chr3	136331171	136331426
Dam-NKX2-5Y191C_1030	chr15	59147138	59147849
Dam-NKX2-5Y191C_1031	chr4	40186178	40186535
Dam-NKX2-5Y191C_1032	chr17	15637391	15637668
Dam-NKX2-5Y191C_1033	chr9	77193339	77193591
Dam-NKX2-5Y191C_1034	chr2	76791415	76791786
Dam-NKX2-5Y191C_1035	chr9	42072591	42072927
Dam-NKX2-5Y191C_1036	chr18	39646519	39646952
Dam-NKX2-5Y191C_1037	chr13	12297884	12298335
Dam-NKX2-5Y191C_1038	chr13	5861397	5862093
Dam-NKX2-5Y191C_1039	chr6	115624133	115624501
Dam-NKX2-5Y191C_1040	chr4	118889656	118890020
Dam-NKX2-5Y191C_1041	chr9	23024246	23024702
Dam-NKX2-5Y191C_1042	chr8	107749159	107749436
Dam-NKX2-5Y191C_1043	chr7	97593130	97593374
Dam-NKX2-5Y191C_1044	chr2	52187519	52187893
Dam-NKX2-5Y191C_1045	chr5	77352770	77353700
Dam-NKX2-5Y191C_1046	chr5	31754824	31755585
Dam-NKX2-5Y191C_1047	chr5	69933946	69934277
Dam-NKX2-5Y191C_1048	chr1	66983908	66984271
Dam-NKX2-5Y191C_1049	chr1	43226307	43226648
Dam-NKX2-5Y191C_1050	chr11	50107433	50107643
Dam-NKX2-5Y191C_1051	chr6	33212984	33213565
Dam-NKX2-5Y191C_1052	chr17	82136967	82137281
Dam-NKX2-5Y191C_1053	chr12	83358888	83359251
Dam-NKX2-5Y191C_1054	chr5	107681751	107682036
Dam-NKX2-5Y191C_1055	chr3	145314836	145315702
Dam-NKX2-5Y191C_1056	chr13	59649130	59649643
Dam-NKX2-5Y191C_1057	chr9	7270589	7271066
Dam-NKX2-5Y191C_1058	chr4	126107076	126107380
Dam-NKX2-5Y191C_1059	chr1	137640306	137640615
Dam-NKX2-5Y191C_1060	chr2	155652479	155652924
Dam-NKX2-5Y191C_1061	chr2	121413451	121413779
Dam-NKX2-5Y191C_1062	chr13	104126087	104126590
Dam-NKX2-5Y191C_1063	chr9	14081963	14082220
Dam-NKX2-5Y191C_1064	chr11	93745890	93746154
Dam-NKX2-5Y191C_1065	chr2	150833983	150834356
Dam-NKX2-5Y191C_1066	chr2	155920905	155921479
Dam-NKX2-5Y191C_1067	chr8	67169344	67169957
Dam-NKX2-5Y191C_1068	chr5	77288742	77288998
Dam-NKX2-5Y191C_1069	chr11	107068841	107069165
Dam-NKX2-5Y191C_1070	chr10	80501432	80501869
Dam-NKX2-5Y191C_1071	chr7	80685580	80685941
Dam-NKX2-5Y191C_1072	chr1	152838644	152839002
Dam-NKX2-5Y191C_1073	chr7	127041409	127041931
Dam-NKX2-5Y191C_1074	chr12	7978699	7978954
Dam-NKX2-5Y191C_1075	chr19	34333240	34333505
Dam-NKX2-5Y191C_1076	chr17	71347288	71348019
Dam-NKX2-5Y191C_1077	chr1	82586239	82586639
Dam-NKX2-5Y191C_1078	chr15	58911528	58911961
Dam-NKX2-5Y191C_1079	chr15	41646270	41646648
Dam-NKX2-5Y191C_1080	chr8	23647534	23647953
Dam-NKX2-5Y191C_1081	chr4	116952866	116953262
Dam-NKX2-5Y191C_1082	chrX	146893361	146893631
Dam-NKX2-5Y191C_1083	chr4	81558758	81559084
Dam-NKX2-5Y191C_1084	chr7	29605738	29606324
Dam-NKX2-5Y191C_1085	chr3	121345982	121346437
Dam-NKX2-5Y191C_1086	chr14	120674085	120674408
Dam-NKX2-5Y191C_1087	chr17	33920121	33920407
Dam-NKX2-5Y191C_1088	chr8	107152956	107153825
Dam-NKX2-5Y191C_1089	chr7	149640970	149641343
Dam-NKX2-5Y191C_1090	chr16	28751616	28752233
Dam-NKX2-5Y191C_1091	chr4	116298713	116299126
Dam-NKX2-5Y191C_1092	chr19	5848341	5848613
Dam-NKX2-5Y191C_1093	chr12	55796913	55797394
Dam-NKX2-5Y191C_1094	chr16	22528396	22528893
Dam-NKX2-5Y191C_1095	chr4	41203687	41203953
Dam-NKX2-5Y191C_1096	chr11	20642331	20642605
Dam-NKX2-5Y191C_1097	chr18	53904688	53905055
Dam-NKX2-5Y191C_1098	chr16	49701581	49701878
Dam-NKX2-5Y191C_1099	chr14	21650313	21650654
Dam-NKX2-5Y191C_1100	chr15	102552954	102553285
Dam-NKX2-5Y191C_1101	chr7	150923922	150924426
Dam-NKX2-5Y191C_1102	chr4	71866329	71866708
Dam-NKX2-5Y191C_1103	chr10	67739801	67740898
Dam-NKX2-5Y191C_1104	chr17	29170073	29170359
Dam-NKX2-5Y191C_1105	chr3	38382073	38382333
Dam-NKX2-5Y191C_1106	chr12	4881435	4881788
Dam-NKX2-5Y191C_1107	chr16	77501356	77501671
Dam-NKX2-5Y191C_1108	chr13	55202685	55203250
Dam-NKX2-5Y191C_1109	chr4	135701017	135701590
Dam-NKX2-5Y191C_1110	chr10	116415654	116416233
Dam-NKX2-5Y191C_1111	chr2	13477129	13477413
Dam-NKX2-5Y191C_1112	chr6	51415815	51416149
Dam-NKX2-5Y191C_1113	chr19	53210569	53210816
Dam-NKX2-5Y191C_1114	chr1	173369377	173370188
Dam-NKX2-5Y191C_1115	chr11	83567209	83567553
Dam-NKX2-5Y191C_1116	chr3	121347049	121347311
Dam-NKX2-5Y191C_1117	chr8	59798143	59798477
Dam-NKX2-5Y191C_1118	chr12	85746073	85746685
Dam-NKX2-5Y191C_1119	chr12	81289885	81290224
Dam-NKX2-5Y191C_1120	chr13	92014044	92014485
Dam-NKX2-5Y191C_1121	chr5	32652423	32652793
Dam-NKX2-5Y191C_1122	chr19	5842777	5843252
Dam-NKX2-5Y191C_1123	chr14	8719094	8719413
Dam-NKX2-5Y191C_1124	chr5	77354225	77354567
Dam-NKX2-5Y191C_1125	chr4	109328003	109328356
Dam-NKX2-5Y191C_1126	chr18	61374078	61374430
Dam-NKX2-5Y191C_1127	chr4	41202914	41203384
Dam-NKX2-5Y191C_1128	chr3	69121928	69122212
Dam-NKX2-5Y191C_1129	chr16	34236560	34236805
Dam-NKX2-5Y191C_1130	chr2	76487199	76487659
Dam-NKX2-5Y191C_1131	chr19	40344015	40344345
Dam-NKX2-5Y191C_1132	chr10	12685474	12685833
Dam-NKX2-5Y191C_1133	chr5	89362560	89362889
Dam-NKX2-5Y191C_1134	chr5	74430397	74430752
Dam-NKX2-5Y191C_1135	chr2	140489064	140489468
Dam-NKX2-5Y191C_1136	chr14	27399774	27400025
Dam-NKX2-5Y191C_1137	chr5	147651236	147651897
Dam-NKX2-5Y191C_1138	chr16	92460923	92461519
Dam-NKX2-5Y191C_1139	chr9	51858002	51858451
Dam-NKX2-5Y191C_1140	chr3	60306841	60307089
Dam-NKX2-5Y191C_1141	chr16	94830757	94831049
Dam-NKX2-5Y191C_1142	chr18	13019674	13020033
Dam-NKX2-5Y191C_1143	chr1	69738211	69738537
Dam-NKX2-5Y191C_1144	chr9	59466150	59466539
Dam-NKX2-5Y191C_1145	chr10	45593798	45594236
Dam-NKX2-5Y191C_1146	chr6	17256651	17257063
Dam-NKX2-5Y191C_1147	chr1	66908734	66909041
Dam-NKX2-5Y191C_1148	chr11	116029082	116029338
Dam-NKX2-5Y191C_1149	chr8	87888260	87888558
Dam-NKX2-5Y191C_1150	chr2	148506481	148506781
Dam-NKX2-5Y191C_1151	chr14	57653804	57654162
Dam-NKX2-5Y191C_1152	chr1	55082900	55083188
Dam-NKX2-5Y191C_1153	chr3	104025209	104025501
Dam-NKX2-5Y191C_1154	chr17	82191252	82191501
Dam-NKX2-5Y191C_1155	chr12	16903656	16903906
Dam-NKX2-5Y191C_1156	chr19	34329486	34329813
Dam-NKX2-5Y191C_1157	chr12	55961403	55962175
Dam-NKX2-5Y191C_1158	chr16	63862628	63862942
Dam-NKX2-5Y191C_1159	chr7	109266465	109266785
Dam-NKX2-5Y191C_1160	chr15	31465752	31466071
Dam-NKX2-5Y191C_1161	chr4	119489082	119489404

## Sheet: 3 - Dam-NKX2-5dHD
peak	chromosome	start	end	gene
Dam-NKX2-5dHD_1	chr4	125745081	125745370	Lsm10 (-28671), Oscp1 (+9417)
Dam-NKX2-5dHD_2	chr13	23837345	23837919	Hist1h2ab (-5325), Hist1h2bb (-971), Hist1h3c (-242)
Dam-NKX2-5dHD_3	chr11	98255596	98256615	Pgap3 (+5698), Pnmt (+8160)
Dam-NKX2-5dHD_4	chr1	134207494	134208917	Nuak2 (-4496)
Dam-NKX2-5dHD_5	chr5	116899599	116901734	Hspb8 (-27794)
Dam-NKX2-5dHD_6	chr18	60765874	60766816	Myoz3 (-14975), Synpo (+23394)
Dam-NKX2-5dHD_7	chr9	44142337	44143020	H2afx (-119)
Dam-NKX2-5dHD_8	chr12	5382681	5383140	Klhl29 (-423)
Dam-NKX2-5dHD_9	chr6	83781653	83782149	Paip2b (-166)
Dam-NKX2-5dHD_10	chr4	150283509	150284415	Park7 (+68)
Dam-NKX2-5dHD_11	chr13	23635166	23636459	Hist1h2bh (-592), Hist1h3f (-108)
Dam-NKX2-5dHD_12	chr6	86798756	86799541	Aak1 (-362)
Dam-NKX2-5dHD_13	chr9	45792882	45793552	Pafah1b2 (-263)
Dam-NKX2-5dHD_14	chr7	128218018	128218735	Igsf6 (-333)
Dam-NKX2-5dHD_15	chr11	96886340	96887182	Scrn2 (-4505)
Dam-NKX2-5dHD_16	chr8	129118073	129119821	Irf2bp2 (-1611)
Dam-NKX2-5dHD_17	chr13	23662890	23663286	Hist1h3d (-3252), Hist1h2bg (-181), Hist1h2ae (+1)
Dam-NKX2-5dHD_18	chr5	42235590	42236202	Bod1l (-342)
Dam-NKX2-5dHD_19	chr4	11083838	11084554	Trp53inp1 (+608)
Dam-NKX2-5dHD_20	chr3	84389839	84390534	Arfip1 (-3640)
Dam-NKX2-5dHD_21	chr7	96781182	96781761	Me3 (+144)
Dam-NKX2-5dHD_22	chr1	79856564	79856902	Serpine2 (-1493)
Dam-NKX2-5dHD_23	chr6	113419880	113420709	Il17rc (-1154)
Dam-NKX2-5dHD_24	chr13	38241814	38243036	Dsp (-738)
Dam-NKX2-5dHD_25	chr18	60763247	60764291	Myoz3 (-12399), Synpo (+25970)
Dam-NKX2-5dHD_26	chr12	53980051	53980923	NONE
Dam-NKX2-5dHD_27	chr19	34826840	34827555	Slc16a12 (-5597)
Dam-NKX2-5dHD_28	chr13	23775664	23776073	Hist1h2bc (-199), Hist1h2ac (-41), Gm9998 (+612)
Dam-NKX2-5dHD_29	chr6	119146380	119147556	Cacna1c (-541)
Dam-NKX2-5dHD_30	chr4	137860303	137860704	Ddost (-149)
Dam-NKX2-5dHD_31	chr15	83424609	83425558	Ttll12 (+503)
Dam-NKX2-5dHD_32	chr11	98634332	98635283	Nr1d1 (+1748)
Dam-NKX2-5dHD_33	chr13	23626060	23627437	Hist1h3g (-538), Hist1h2af (+969)
Dam-NKX2-5dHD_34	chr3	94819457	94820399	Zfp687 (-768)
Dam-NKX2-5dHD_35	chr5	139854796	139855540	Gpr146 (-1453)
Dam-NKX2-5dHD_36	chr4	135866215	135866938	Hnrnpr (-314)
Dam-NKX2-5dHD_37	chr9	44113564	44114135	Hinfp (-96)
Dam-NKX2-5dHD_38	chr15	78893340	78893901	Ankrd54 (-332)
Dam-NKX2-5dHD_39	chr7	149642540	149643834	Lsp1 (-14561), Tnni2 (+14813)
Dam-NKX2-5dHD_40	chr8	112216105	112217544	2400003C14Rik (+369)
Dam-NKX2-5dHD_41	chr6	38382668	38383489	Ubn2 (-846)
Dam-NKX2-5dHD_42	chr4	109330346	109330992	Cdkn2c (+7308)
Dam-NKX2-5dHD_43	chr4	119089763	119090582	Zmynd12 (-5116), Ccdc30 (-2047)
Dam-NKX2-5dHD_44	chr11	83285436	83286066	Taf15 (-859)
Dam-NKX2-5dHD_45	chr4	132091194	132091684	Atpif1 (-1589), Dnajc8 (-35)
Dam-NKX2-5dHD_46	chr9	119890412	119890910	Csrnp1 (+3115), Ttc21a (+43937)
Dam-NKX2-5dHD_47	chr15	54944153	54944867	Deptor (+472), Gm9920 (+627)
Dam-NKX2-5dHD_48	chr2	90958146	90959891	Mybpc3 (+718)
Dam-NKX2-5dHD_49	chr3	96024750	96025369	Hist2h2ac (-293), Hist2h2be (+16), Hist2h2ab (+1221)
Dam-NKX2-5dHD_50	chr19	5848237	5849487	Scyl1 (-77461), Frmd8 (+26346)
Dam-NKX2-5dHD_51	chr13	50513362	50513844	Fbxw17 (+357)
Dam-NKX2-5dHD_52	chr11	59622785	59623845	Flcn (-40)
Dam-NKX2-5dHD_53	chr4	125724109	125724952	Mrps15 (+359)
Dam-NKX2-5dHD_54	chr3	40603315	40603859	Plk4 (-286)
Dam-NKX2-5dHD_55	chr17	3114301	3114764	Scaf8 (-439)
Dam-NKX2-5dHD_56	chr5	8798567	8799001	Abcb1b (+637)
Dam-NKX2-5dHD_57	chr12	25782343	25783574	Id2 (-2002)
Dam-NKX2-5dHD_58	chr9	20781137	20781621	S1pr2 (-142)
Dam-NKX2-5dHD_59	chr4	154440677	154441221	Pex10 (-190)
Dam-NKX2-5dHD_60	chr7	25331845	25332288	2310033E01Rik (-1043), Xrcc1 (+55)
Dam-NKX2-5dHD_61	chr19	57389471	57390167	Ablim1 (-99297), Fam160b1 (-45680)
Dam-NKX2-5dHD_62	chr2	18914920	18915941	Pip4k2a (+4317)
Dam-NKX2-5dHD_63	chr11	62545464	62546076	Zfp287 (-3175)
Dam-NKX2-5dHD_64	chr16	10411590	10412095	Nubp1 (-188)
Dam-NKX2-5dHD_65	chr17	26122473	26122959	Solh (-20244), Rab11fip3 (+83406)
Dam-NKX2-5dHD_66	chr11	97176279	97176897	Mrpl45 (-442)
Dam-NKX2-5dHD_67	chr9	44580639	44581039	Arcn1 (-4948), Ift46 (-253)
Dam-NKX2-5dHD_68	chr8	123013778	123015237	Gse1 (+1742)
Dam-NKX2-5dHD_69	chr10	62892482	62893096	Ctnna3 (-57)
Dam-NKX2-5dHD_70	chr2	155781931	155782618	Cep250 (-19)
Dam-NKX2-5dHD_71	chr14	52722665	52724061	Hnrnpc (+340)
Dam-NKX2-5dHD_72	chr1	169213459	169214055	Uck2 (+1501)
Dam-NKX2-5dHD_73	chr12	73185112	73186210	Jkamp (-1449), 2810055F11Rik (+639)
Dam-NKX2-5dHD_74	chr9	20988467	20989271	Pde4a (+18711), Keap1 (+54907)
Dam-NKX2-5dHD_75	chr5	123582404	123583321	Rhof (-225)
Dam-NKX2-5dHD_76	chr12	41615330	41615696	NONE
Dam-NKX2-5dHD_77	chr8	42220387	42221041	Mtus1 (-1634)
Dam-NKX2-5dHD_78	chr5	107717477	107717950	Tgfbr3 (+900)
Dam-NKX2-5dHD_79	chr9	111336464	111337212	Dclk3 (-4747)
Dam-NKX2-5dHD_80	chr2	156832223	156832922	Dsn1 (+238)
Dam-NKX2-5dHD_81	chr8	130881879	130882437	Nrp1 (-815)
Dam-NKX2-5dHD_82	chr17	26980941	26982028	Nkx2-5 (-2975)
Dam-NKX2-5dHD_83	chr8	73315694	73316192	Mast3 (+389)
Dam-NKX2-5dHD_84	chr18	64647768	64648521	Fech (+575)
Dam-NKX2-5dHD_85	chr8	87504989	87505951	Junb (-2853)
Dam-NKX2-5dHD_86	chr4	11631197	11631733	Gem (-129)
Dam-NKX2-5dHD_87	chr3	94846136	94846821	Psmd4 (-12)
Dam-NKX2-5dHD_88	chr16	4079555	4080624	Trap1 (-2280)
Dam-NKX2-5dHD_89	chr11	86887153	86888057	Gdpd1 (+34)
Dam-NKX2-5dHD_90	chr11	58595858	58596421	Olfr314 (-3501)
Dam-NKX2-5dHD_91	chr6	29381514	29382798	Flnc (-997)
Dam-NKX2-5dHD_92	chr19	6235328	6235657	Atg2a (-6175), Ppp2r5b (+347)
Dam-NKX2-5dHD_93	chr12	77635666	77636100	Plekhg3 (+1336)
Dam-NKX2-5dHD_94	chr19	15998509	15999496	Psat1 (+512)
Dam-NKX2-5dHD_95	chr10	82321460	82322897	Eid3 (-7192), Txnrd1 (+25483)
Dam-NKX2-5dHD_96	chr17	49964504	49965427	NONE
Dam-NKX2-5dHD_97	chr11	95697998	95698556	Gngt2 (-5332)
Dam-NKX2-5dHD_98	chr3	145316362	145316953	Cyr61 (-3709)
Dam-NKX2-5dHD_99	chr4	117587586	117588249	Ipo13 (-314)
Dam-NKX2-5dHD_100	chr17	27993848	27994547	Uhrf1bp1 (+746)
Dam-NKX2-5dHD_101	chr17	26976557	26977144	Nkx2-5 (+1659)
Dam-NKX2-5dHD_102	chr11	19819757	19820463	Spred2 (-4335)
Dam-NKX2-5dHD_103	chr11	66724357	66724967	Pirt (-831)
Dam-NKX2-5dHD_104	chr14	30534064	30534681	Cacna2d3 (+677)
Dam-NKX2-5dHD_105	chr17	26389661	26390437	Luc7l (+194)
Dam-NKX2-5dHD_106	chr10	13216144	13216722	Fuca2 (-4401)
Dam-NKX2-5dHD_107	chr1	167166314	167167254	Tiprl (+305)
Dam-NKX2-5dHD_108	chr9	21229066	21229487	Dnm2 (-112)
Dam-NKX2-5dHD_109	chr10	116481353	116482717	Lrrc10 (-362)
Dam-NKX2-5dHD_110	chr11	58791613	58792314	Trim11 (+346)
Dam-NKX2-5dHD_111	chr12	92828913	92829383	Gtf2a1 (-1059)
Dam-NKX2-5dHD_112	chr5	24108150	24108815	Smarcd3 (-663)
Dam-NKX2-5dHD_113	chr3	96048724	96049187	Hist2h3c1 (-5906), Hist2h2aa2 (-4740), Hist2h3c1 (-505)
Dam-NKX2-5dHD_114	chr19	41876072	41876857	Arhgap19 (+109)
Dam-NKX2-5dHD_115	chr1	74047608	74048332	NONE
Dam-NKX2-5dHD_116	chr8	73300737	73301465	Pik3r2 (-490)
Dam-NKX2-5dHD_117	chr6	30520419	30520847	Cpa4 (+2257)
Dam-NKX2-5dHD_118	chr17	75864369	75864836	Rasgrp3 (+29358), Fam98a (+86683)
Dam-NKX2-5dHD_119	chr12	73636720	73637338	1810048J11Rik (-315)
Dam-NKX2-5dHD_120	chr15	34012944	34013329	Mtdh (+663)
Dam-NKX2-5dHD_121	chr10	24314957	24315451	Ctgf (-44)
Dam-NKX2-5dHD_122	chr10	80813037	80813859	Hmg20b (-276)
Dam-NKX2-5dHD_123	chr7	132989615	132991079	NONE
Dam-NKX2-5dHD_124	chr9	64654891	64655608	Dennd4a (-3568)
Dam-NKX2-5dHD_125	chr9	96919873	96920468	Spsb4 (-1397)
Dam-NKX2-5dHD_126	chr14	21521901	21522583	2310021P13Rik (-4532), Chchd1 (-7)
Dam-NKX2-5dHD_127	chr18	70689505	70690115	Poli (+165)
Dam-NKX2-5dHD_128	chr3	30895488	30895845	Prkci (+974)
Dam-NKX2-5dHD_129	chr15	98782333	98782801	Tuba1a (+1365)
Dam-NKX2-5dHD_130	chr1	121969669	121970199	Tmem37 (+423)
Dam-NKX2-5dHD_131	chr10	4540389	4540916	Fbxo5 (-423)
Dam-NKX2-5dHD_132	chr1	95698316	95698717	Ing5 (-2025), Dtymk (-6)
Dam-NKX2-5dHD_133	chr2	164280570	164281475	Sys1 (-5448)
Dam-NKX2-5dHD_134	chr5	125028608	125029202	Gtf2h3 (-252), Eif2b1 (+161)
Dam-NKX2-5dHD_135	chr14	21207998	21208811	Dnajc9 (-273)
Dam-NKX2-5dHD_136	chr4	13670759	13671184	Runx1t1 (+523)
Dam-NKX2-5dHD_137	chr3	122688850	122689282	Usp53 (-1701)
Dam-NKX2-5dHD_138	chr9	20837074	20837798	Icam5 (+954)
Dam-NKX2-5dHD_139	chr8	73987684	73988366	Dda1 (-5068), Mrpl34 (-800), Abhd8 (-469)
Dam-NKX2-5dHD_140	chr17	71339308	71339679	Myl12b (+362)
Dam-NKX2-5dHD_141	chr3	32717908	32718293	Usp13 (+1553)
Dam-NKX2-5dHD_142	chr15	3944718	3945560	AW549877 (+613)
Dam-NKX2-5dHD_143	chr3	86804504	86805048	Cd1d1 (-1514)
Dam-NKX2-5dHD_144	chr19	4000539	4001076	Doc2g (-2577), Nudt8 (+228)
Dam-NKX2-5dHD_145	chr11	94870736	94871200	Samd14 (-225)
Dam-NKX2-5dHD_146	chr15	98437132	98438149	Adcy6 (+423)
Dam-NKX2-5dHD_147	chr8	26127503	26127978	Adam9 (-347), Tm2d2 (+58)
Dam-NKX2-5dHD_148	chr1	16655658	16656283	Tmem70 (+699)
Dam-NKX2-5dHD_149	chr16	90935065	90935394	1110004E09Rik (-136)
Dam-NKX2-5dHD_150	chr5	144378944	144379694	Cyth3 (-3997)
Dam-NKX2-5dHD_151	chr8	67213819	67214116	Sc4mol (-1593)
Dam-NKX2-5dHD_152	chr19	7291545	7292272	Cox8a (+197)
Dam-NKX2-5dHD_153	chr7	117129646	117130012	Tmem41b (-70)
Dam-NKX2-5dHD_154	chr3	116211045	116211503	Dbt (-4723), Rtcd1 (-181)
Dam-NKX2-5dHD_155	chr11	60873442	60873730	Kcnj12 (-5720)
Dam-NKX2-5dHD_156	chr7	123336212	123336475	1110004F10Rik (+99450)
Dam-NKX2-5dHD_157	chr3	88968189	88968636	Hcn3 (-4334), Clk2 (-314)
Dam-NKX2-5dHD_158	chr12	86113974	86115017	Npc2 (-434), Isca2 (+276)
Dam-NKX2-5dHD_159	chr4	43571070	43571696	Creb3 (-4123), Tln1 (+4072)
Dam-NKX2-5dHD_160	chr11	66866419	66866780	2310004I24Rik (-480), Sco1 (+428)
Dam-NKX2-5dHD_161	chr12	16900244	16900711	Rock2 (-1306)
Dam-NKX2-5dHD_162	chr7	148632971	148633980	Lrdd (-4224), Rplp2 (-73)
Dam-NKX2-5dHD_163	chr4	126106900	126107380	Eif2c3 (-354)
Dam-NKX2-5dHD_164	chr11	53519827	53520878	Rad50 (+468)
Dam-NKX2-5dHD_165	chr7	52147888	52148558	Fuz (-3226), Med25 (-487)
Dam-NKX2-5dHD_166	chr12	5381113	5381851	Klhl29 (+1006)
Dam-NKX2-5dHD_167	chr3	32718727	32719008	Usp13 (+2320)
Dam-NKX2-5dHD_168	chr5	140251060	140251511	Ints1 (+346)
Dam-NKX2-5dHD_169	chr11	100333800	100334291	Klhl11 (+50)
Dam-NKX2-5dHD_170	chr8	79975303	79975846	Arhgap10 (+66231)
Dam-NKX2-5dHD_171	chr9	99143475	99144379	Cep70 (+40)
Dam-NKX2-5dHD_172	chr11	98812918	98813314	Rara (-8669), Cdc6 (+43913)
Dam-NKX2-5dHD_173	chr4	41260955	41262141	Dcaf12 (+386)
Dam-NKX2-5dHD_174	chr8	107749084	107749580	D230025D16Rik (+244)
Dam-NKX2-5dHD_175	chr15	81636118	81636957	Tef (+3435), Tob2 (+52218)
Dam-NKX2-5dHD_176	chr1	180459456	180459972	Kif26b (+458)
Dam-NKX2-5dHD_177	chr13	23654222	23654968	Hist1h3e (-361)
Dam-NKX2-5dHD_178	chr17	85356331	85356705	Ppm1b (-823)
Dam-NKX2-5dHD_179	chr8	73197091	73197496	Lsm4 (+164)
Dam-NKX2-5dHD_180	chr6	145814655	145815152	Bhlhe41 (-1044)
Dam-NKX2-5dHD_181	chr17	67702883	67703545	Ptprm (+585)
Dam-NKX2-5dHD_182	chr10	80638994	80640017	Dapk3 (-6246), Eef2 (+130)
Dam-NKX2-5dHD_183	chr8	80134149	80134634	Tmem184c (+160)
Dam-NKX2-5dHD_184	chr13	43460638	43461113	Sirt5 (-5212)
Dam-NKX2-5dHD_185	chr8	26865134	26865654	Ddhd2 (-642)
Dam-NKX2-5dHD_186	chr11	107330020	107330517	Pitpnc1 (+1765)
Dam-NKX2-5dHD_187	chr13	33054212	33054957	Serpinb6b (-2797)
Dam-NKX2-5dHD_188	chr2	68700090	68700608	Lass6 (+735)
Dam-NKX2-5dHD_189	chr15	57965396	57967179	Atad2 (+349)
Dam-NKX2-5dHD_190	chr9	90058931	90059499	Adamts7 (+1399)
Dam-NKX2-5dHD_191	chr9	110855674	110856492	Lrrc2 (+2034)
Dam-NKX2-5dHD_192	chr7	87679448	87680125	Blm (+218)
Dam-NKX2-5dHD_193	chr19	11000748	11001000	Zp1 (-5783)
Dam-NKX2-5dHD_194	chr6	38304344	38304994	Zc3hav1 (-66)
Dam-NKX2-5dHD_195	chr19	5107046	5107298	Rab1b (-176)
Dam-NKX2-5dHD_196	chr5	73791321	73791807	Cwh43 (-5753)
Dam-NKX2-5dHD_197	chr3	53268131	53268526	Nhlrc3 (-1149), 2810046L04Rik (+590)
Dam-NKX2-5dHD_198	chr9	21069376	21070014	Atg4d (-48)
Dam-NKX2-5dHD_199	chr16	5134448	5135490	Ppl (-2395)
Dam-NKX2-5dHD_200	chr7	25291564	25291958	Zfp428 (-345)
Dam-NKX2-5dHD_201	chr7	117769053	117769946	Adm (-1683)
Dam-NKX2-5dHD_202	chr4	45333416	45333853	Exosc3 (-160)
Dam-NKX2-5dHD_203	chr11	54673770	54674593	Hint1 (-5758), Lyrm7 (-89)
Dam-NKX2-5dHD_204	chr4	133959669	133959959	Stmn1 (-64421), Pafah2 (+7539)
Dam-NKX2-5dHD_205	chr17	5117369	5118078	NONE
Dam-NKX2-5dHD_206	chr3	105701943	105702385	Adora3 (-5175)
Dam-NKX2-5dHD_207	chr16	17132261	17132817	Sdf2l1 (-63)
Dam-NKX2-5dHD_208	chr2	20890634	20891292	Arhgap21 (-1615)
Dam-NKX2-5dHD_209	chr4	118099985	118102136	Elovl1 (-1245)
Dam-NKX2-5dHD_210	chr15	76286354	76286923	Scx (-1229)
Dam-NKX2-5dHD_211	chr5	139847535	139848271	Gpr146 (-8718), Cyp2w1 (+19332)
Dam-NKX2-5dHD_212	chr5	3343414	3344033	Cdk6 (-395)
Dam-NKX2-5dHD_213	chr16	90831764	90832594	4931408A02Rik (+1075)
Dam-NKX2-5dHD_214	chr17	71347288	71348050	Myl12b (-7813), 2900073G15Rik (+4204)
Dam-NKX2-5dHD_215	chr6	115944112	115944646	Plxnd1 (+644)
Dam-NKX2-5dHD_216	chr4	148682439	148683127	Kif1b (-976)
Dam-NKX2-5dHD_217	chr10	17516844	17517580	Txlnb (+1187)
Dam-NKX2-5dHD_218	chr2	25053185	25053731	A830007P12Rik (-1125)
Dam-NKX2-5dHD_219	chr4	131829761	131830445	Taf12 (-187)
Dam-NKX2-5dHD_220	chr4	140541105	140541396	Atp13a2 (-1537)
Dam-NKX2-5dHD_221	chr17	56752613	56753222	2410015M20Rik (-3724), Rpl36 (+100)
Dam-NKX2-5dHD_222	chr1	137734812	137735316	Tnnt2 (+2101)
Dam-NKX2-5dHD_223	chr7	146569709	146570077	Inpp5a (-5115)
Dam-NKX2-5dHD_224	chr8	28270672	28271235	Brf2 (-31850), Rab11fip1 (+14164)
Dam-NKX2-5dHD_225	chr7	54101857	54102511	Ldha (-268)
Dam-NKX2-5dHD_226	chr16	94746421	94746871	Dscr3 (+1590)
Dam-NKX2-5dHD_227	chr5	23958943	23959416	Tmub1 (-5516), Agap3 (+1185)
Dam-NKX2-5dHD_228	chr19	7016043	7016400	Gpr137 (-539), Bad (-123)
Dam-NKX2-5dHD_229	chr4	140615186	140616212	Crocc (-6123)
Dam-NKX2-5dHD_230	chr7	30980081	30981156	Capns1 (-552)
Dam-NKX2-5dHD_231	chr15	82184054	82184868	Ndufa6 (+260)
Dam-NKX2-5dHD_232	chr7	53370372	53372676	Kcnj11 (-15917), Abcc8 (+63879)
Dam-NKX2-5dHD_233	chr4	147459585	147459929	Agtrap (+2416)
Dam-NKX2-5dHD_234	chr11	62459560	62460563	Mmgt2 (-2104), BC046404 (+1963)
Dam-NKX2-5dHD_235	chr5	115015633	115015954	BC057022 (-2466)
Dam-NKX2-5dHD_236	chr9	24576189	24577652	Tbx20 (+1825)
Dam-NKX2-5dHD_237	chr17	56259487	56260177	Plin5 (-2861), Lrg1 (+1537)
Dam-NKX2-5dHD_238	chr4	132066082	132066790	Sesn2 (-65)
Dam-NKX2-5dHD_239	chr7	88489111	88489550	Rps17 (+789)
Dam-NKX2-5dHD_240	chr2	163518509	163519443	Pkig (+34854), Ada (+56937)
Dam-NKX2-5dHD_241	chr5	139853706	139854209	Gpr146 (-2663)
Dam-NKX2-5dHD_242	chr4	99380160	99381387	Alg6 (-1547)
Dam-NKX2-5dHD_243	chr11	94902711	94903172	Pdk2 (-257)
Dam-NKX2-5dHD_244	chr7	25290637	25291177	Zfp428 (-1199)
Dam-NKX2-5dHD_245	chr19	40662669	40663304	Aldh18a1 (-34)
Dam-NKX2-5dHD_246	chr7	56502950	56503820	Nav2 (+1826)
Dam-NKX2-5dHD_247	chr18	69753051	69753419	NONE
Dam-NKX2-5dHD_248	chr8	14906783	14907427	Arhgef10 (-4612)
Dam-NKX2-5dHD_249	chr7	142890200	142890671	Mki67 (+17626)
Dam-NKX2-5dHD_250	chr15	83999074	83999329	Pnpla3 (+956)
Dam-NKX2-5dHD_251	chr9	21759967	21760652	2310047B19Rik (+113)
Dam-NKX2-5dHD_252	chr8	107813530	107813914	4931428F04Rik (-294)
Dam-NKX2-5dHD_253	chr9	54843032	54843541	Chrna5 (+14600), Chrna3 (+31079)
Dam-NKX2-5dHD_254	chr11	62943817	62944294	Pmp22 (-956)
Dam-NKX2-5dHD_255	chr11	117835720	117836475	Socs3 (-5418)
Dam-NKX2-5dHD_256	chr15	11834531	11835084	Npr3 (+621)
Dam-NKX2-5dHD_257	chr13	47202010	47202396	Dek (-614)
Dam-NKX2-5dHD_258	chr17	56323167	56323595	D17Wsu104e (-38)
Dam-NKX2-5dHD_259	chr9	44225879	44227214	Ccdc84 (-457)
Dam-NKX2-5dHD_260	chr14	32251178	32251657	Sh3bp5 (-2199)
Dam-NKX2-5dHD_261	chr16	14705707	14706290	Snai2 (+47)
Dam-NKX2-5dHD_262	chr4	135429047	135429563	Pnrc2 (+456)
Dam-NKX2-5dHD_263	chr19	57388542	57388920	Ablim1 (-98209), Fam160b1 (-46768)
Dam-NKX2-5dHD_264	chr11	68853332	68854041	Aurkb (-5458)
Dam-NKX2-5dHD_265	chr5	77375647	77376733	Paics (-4246)
Dam-NKX2-5dHD_266	chr11	50190055	50190587	Hnrnph1 (-900)
Dam-NKX2-5dHD_267	chr4	155149110	155149860	Vwa1 (-815)
Dam-NKX2-5dHD_268	chr19	45151046	45151396	Kazald1 (+592)
Dam-NKX2-5dHD_269	chr6	38497188	38497822	Luc7l2 (-3939)
Dam-NKX2-5dHD_270	chr6	54761832	54762725	Znrf2 (-4631)
Dam-NKX2-5dHD_271	chr4	133849318	133849715	Pdik1l (-6349)
Dam-NKX2-5dHD_272	chr7	29595056	29595493	Hnrnpl (-634)
Dam-NKX2-5dHD_273	chr5	130620265	130620954	Kctd7 (-148)
Dam-NKX2-5dHD_274	chr9	37062986	37063329	Slc37a2 (+165)
Dam-NKX2-5dHD_275	chr8	11554925	11555586	Cars2 (-4485), Ing1 (-810)
Dam-NKX2-5dHD_276	chr11	88717461	88718789	Akap1 (+7775)
Dam-NKX2-5dHD_277	chr15	83082401	83082981	A4galt (-487)
Dam-NKX2-5dHD_278	chr19	10255632	10256257	Fads1 (-1433)
Dam-NKX2-5dHD_279	chr2	28794526	28794882	Barhl1 (-22763)
Dam-NKX2-5dHD_280	chr7	117762209	117763343	Sbf2 (-4342)
Dam-NKX2-5dHD_281	chr14	58444880	58445250	F630043A04Rik (-65), Mrp63 (-11)
Dam-NKX2-5dHD_282	chr4	151691661	151692593	Rnf207 (+607)
Dam-NKX2-5dHD_283	chr11	104410988	104412045	Myl4 (-460), Cdc27 (+417)
Dam-NKX2-5dHD_284	chr3	122816978	122817623	Myoz2 (-79396)
Dam-NKX2-5dHD_285	chr13	113778029	113778318	Gm6320 (-5902), Ccno (+164)
Dam-NKX2-5dHD_286	chr6	72183068	72183706	Atoh8 (+2184)
Dam-NKX2-5dHD_287	chr4	59819303	59819988	Snx30 (+1124)
Dam-NKX2-5dHD_288	chr4	116393551	116394102	Tesk2 (+267)
Dam-NKX2-5dHD_289	chr15	99553548	99554961	2310016M24Rik (-1794)
Dam-NKX2-5dHD_290	chr4	135804915	135805838	Tcea3 (+1505)
Dam-NKX2-5dHD_291	chr5	38215899	38216482	Msx1 (-367)
Dam-NKX2-5dHD_292	chr3	88550618	88551150	Syt11 (+26028), Rit1 (+30108)
Dam-NKX2-5dHD_293	chr2	155652316	155652850	Eif6 (+78)
Dam-NKX2-5dHD_294	chr12	103214487	103214827	Cpsf2 (+473)
Dam-NKX2-5dHD_295	chr9	24578680	24580076	Tbx20 (-632)
Dam-NKX2-5dHD_296	chr3	108166508	108167663	Mybphl (-743)
Dam-NKX2-5dHD_297	chr12	114389022	114389568	4930427A07Rik (-5337), Crip1 (-928)
Dam-NKX2-5dHD_298	chr8	123157335	123157764	1190005I06Rik (+732)
Dam-NKX2-5dHD_299	chr1	99992563	99993183	Pam (-664)
Dam-NKX2-5dHD_300	chr6	90412870	90413693	Klf15 (+662)
Dam-NKX2-5dHD_301	chr13	55255775	55256451	Fgfr4 (+1934)
Dam-NKX2-5dHD_302	chr10	127472191	127472657	Naca (+22)
Dam-NKX2-5dHD_303	chr8	113521535	113521811	Ddx19a (+50)
Dam-NKX2-5dHD_304	chr16	36042606	36043296	Wdr5b (+1675)
Dam-NKX2-5dHD_305	chr9	107190665	107191908	Mapkapk3 (+921)
Dam-NKX2-5dHD_306	chr18	42211205	42211711	Sh3rf2 (-1906)
Dam-NKX2-5dHD_307	chr7	31514229	31514592	Tmem147 (+142)
Dam-NKX2-5dHD_308	chr4	134052277	134052929	Paqr7 (-290)
Dam-NKX2-5dHD_309	chr4	135700248	135701017	Id3 (+896)
Dam-NKX2-5dHD_310	chr9	35377596	35378115	Hyls1 (-202)
Dam-NKX2-5dHD_311	chr2	26207542	26208266	Dnlz (-274)
Dam-NKX2-5dHD_312	chr13	118389765	118390537	Hcn1 (-976)
Dam-NKX2-5dHD_313	chr5	72893807	72894940	Corin (+1073)
Dam-NKX2-5dHD_314	chr9	107436233	107436640	Tmem115 (+161)
Dam-NKX2-5dHD_315	chr9	24582560	24582928	Tbx20 (-3998)
Dam-NKX2-5dHD_316	chr3	97672322	97673556	Pde4dip (+19691)
Dam-NKX2-5dHD_317	chr8	107153288	107153899	Cdh16 (-5433), Rrad (+1627)
Dam-NKX2-5dHD_318	chr2	52141834	52142344	Neb (+52229)
Dam-NKX2-5dHD_319	chr2	90908835	90909609	Slc39a13 (+1156)
Dam-NKX2-5dHD_320	chr9	21961174	21961904	Pigyl (+249)
Dam-NKX2-5dHD_321	chr1	193149992	193150639	Tmem206 (+472)
Dam-NKX2-5dHD_322	chr11	53296901	53297307	Ankrd43 (-3407)
Dam-NKX2-5dHD_323	chr4	97446161	97446668	E130114P18Rik (-1676)
Dam-NKX2-5dHD_324	chr16	4077318	4077693	Trap1 (+304)
Dam-NKX2-5dHD_325	chr2	24830751	24831384	Pnpla7 (-485), Mrpl41 (-450)
Dam-NKX2-5dHD_326	chr5	73558538	73559058	Fryl (+89059)
Dam-NKX2-5dHD_327	chr16	31200006	31200667	Acap2 (+987)
Dam-NKX2-5dHD_328	chr7	133573435	133573756	Rabep2 (+1315)
Dam-NKX2-5dHD_329	chr4	133793693	133794169	Cnksr1 (+383)
Dam-NKX2-5dHD_330	chr2	72125019	72125519	B230120H23Rik (+1575)
Dam-NKX2-5dHD_331	chr11	121248752	121249152	Rab40b (+613)
Dam-NKX2-5dHD_332	chr5	125873077	125873508	Ubc (-2906)
Dam-NKX2-5dHD_333	chr8	106864796	106865084	Cmtm3 (+446)
Dam-NKX2-5dHD_334	chr10	90546047	90546329	Apaf1 (-700), Ikbip (+404)
Dam-NKX2-5dHD_335	chr14	63864192	63865277	Gata4 (-638)
Dam-NKX2-5dHD_336	chr11	72861922	72862220	1200014J11Rik (+702)
Dam-NKX2-5dHD_337	chr9	21230362	21230757	Dnm2 (+1171)
Dam-NKX2-5dHD_338	chr11	120458893	120459209	Anapc11 (-684), Thoc4 (+628)
Dam-NKX2-5dHD_339	chr1	9620627	9621427	3110035E14Rik (+29679), Mybl1 (+69263)
Dam-NKX2-5dHD_340	chr11	6428361	6428863	Ccm2 (-18278), Myo1g (-7651)
Dam-NKX2-5dHD_341	chr16	96366692	96367035	Wrb (-162)
Dam-NKX2-5dHD_342	chr11	59021767	59022139	2310033P09Rik (+90)
Dam-NKX2-5dHD_343	chr4	106926944	106927226	Lrrc42 (-947), Hspb11 (+546)
Dam-NKX2-5dHD_344	chr17	56857096	56857608	Vmac (-1008), Ndufa11 (+167)
Dam-NKX2-5dHD_345	chr13	49439149	49439439	Bicd2 (+2376)
Dam-NKX2-5dHD_346	chr4	131978577	131978938	Phactr4 (-397)
Dam-NKX2-5dHD_347	chr17	14833748	14834206	Thbs2 (-2708)
Dam-NKX2-5dHD_348	chr19	56463492	56463846	Nrap (+856)
Dam-NKX2-5dHD_349	chr7	140003929	140004674	Fam53b (-25684), Mettl10 (+40028)
Dam-NKX2-5dHD_350	chr5	77354189	77354898	Paics (-25892), Aasdh (-20005)
Dam-NKX2-5dHD_351	chr15	81688513	81689072	Tob2 (-37)
Dam-NKX2-5dHD_352	chr7	29166065	29166469	Zfp36 (-2020)
Dam-NKX2-5dHD_353	chr5	74593052	74593486	Rasl11b (+1918)
Dam-NKX2-5dHD_354	chrX	7316827	7317291	Ccdc120 (+1391)
Dam-NKX2-5dHD_355	chr6	71837745	71838103	Ptcd3 (+20832), Immt (+56599)
Dam-NKX2-5dHD_356	chrX	11654897	11655510	Bcor (+2475)
Dam-NKX2-5dHD_357	chr9	57614903	57615194	Clk3 (-1382)
Dam-NKX2-5dHD_358	chr12	55796306	55797235	Eapp (+81)
Dam-NKX2-5dHD_359	chr11	83566954	83567553	Heatr6 (+115)
Dam-NKX2-5dHD_360	chr11	68911590	68913459	Per1 (-1135)
Dam-NKX2-5dHD_361	chr17	13184170	13184579	Wtap (+750)
Dam-NKX2-5dHD_362	chr4	114672435	114672770	Stil (-120)
Dam-NKX2-5dHD_363	chr17	33917045	33917616	Angptl4 (+1189)
Dam-NKX2-5dHD_364	chr4	148324915	148325425	NONE
Dam-NKX2-5dHD_365	chr11	86569834	86570633	Cltc (+760)
Dam-NKX2-5dHD_366	chr10	85419873	85420229	D10Wsu52e (+487)
Dam-NKX2-5dHD_367	chr11	58121000	58121438	Zfp692-ps (+648)
Dam-NKX2-5dHD_368	chr1	43209297	43209880	Fhl2 (+11217), AI597479 (+54034)
Dam-NKX2-5dHD_369	chr13	49309126	49309736	1110007C09Rik (+1964)
Dam-NKX2-5dHD_370	chr15	102500563	102501130	Atp5g2 (+631)
Dam-NKX2-5dHD_371	chr3	52071713	52071964	Foxo1 (-420)
Dam-NKX2-5dHD_372	chr5	123585122	123585450	Rhof (-2648)
Dam-NKX2-5dHD_373	chr8	106920278	106920868	Cmtm4 (-977)
Dam-NKX2-5dHD_374	chr12	112216035	112216640	Ankrd9 (+893)
Dam-NKX2-5dHD_375	chr12	8928331	8928653	Laptm4a (+379)
Dam-NKX2-5dHD_376	chr17	24349292	24349573	Ntn3 (-3101)
Dam-NKX2-5dHD_377	chr3	99965941	99966239	Gdap2 (-351), Wdr3 (+236)
Dam-NKX2-5dHD_378	chr4	57583266	57583590	NONE
Dam-NKX2-5dHD_379	chr1	182121555	182122214	Adck3 (+4266)
Dam-NKX2-5dHD_380	chr5	123586931	123587711	Setd1b (-4881), Rhof (-4683)
Dam-NKX2-5dHD_381	chr19	29772491	29772911	Mlana (+270)
Dam-NKX2-5dHD_382	chr7	54308221	54308496	Tmem86a (+2349)
Dam-NKX2-5dHD_383	chr13	55815446	55816005	Txndc15 (-285)
Dam-NKX2-5dHD_384	chr11	84642530	84642785	Dhrs11 (-153)
Dam-NKX2-5dHD_385	chr10	67597530	67597862	NONE
Dam-NKX2-5dHD_386	chr11	50244605	50244931	Rufy1 (-155)
Dam-NKX2-5dHD_387	chr4	131909279	131909746	Rcc1 (-7848), Phactr4 (+68848)
Dam-NKX2-5dHD_388	chr7	150923922	150924944	Tnfrsf23 (-52656), Osbpl5 (+3435)
Dam-NKX2-5dHD_389	chr4	40894614	40894946	Chmp5 (-806), Bag1 (+547)
Dam-NKX2-5dHD_390	chr4	132194746	132195116	Eya3 (-30)
Dam-NKX2-5dHD_391	chr1	174268480	174268885	Kcnj10 (-2658)
Dam-NKX2-5dHD_392	chr17	23811708	23812541	Cldn6 (-4207), Thoc6 (-1388), Hcfc1r1 (+1550), Tnfrsf12a (+2291)
Dam-NKX2-5dHD_393	chr2	157967044	157968189	Tgm2 (+4511)
Dam-NKX2-5dHD_394	chr5	124171055	124171420	Zcchc8 (-185)
Dam-NKX2-5dHD_395	chr6	121061096	121061609	Pex26 (-72332), Mical3 (-29726)
Dam-NKX2-5dHD_396	chr4	40799501	40800478	B4galt1 (+1041)
Dam-NKX2-5dHD_397	chr19	4079414	4080513	Cabp2 (-3555)
Dam-NKX2-5dHD_398	chr8	3676423	3676789	Trappc5 (+129)
Dam-NKX2-5dHD_399	chr19	31837261	31837773	Prkg1 (+2006)
Dam-NKX2-5dHD_400	chr15	97978461	97980156	Asb8 (-3176)
Dam-NKX2-5dHD_401	chr5	144090702	144091215	Zdhhc4 (-54)
Dam-NKX2-5dHD_402	chr12	74146636	74147181	Six1 (+790)
Dam-NKX2-5dHD_403	chr4	144481573	144482635	Dhrs3 (-936)
Dam-NKX2-5dHD_404	chr6	146794955	146796267	1700023A16Rik (-3021)
Dam-NKX2-5dHD_405	chr9	49606149	49606656	Ncam1 (+771)
Dam-NKX2-5dHD_406	chr12	16766625	16767195	Greb1 (+40782)
Dam-NKX2-5dHD_407	chr15	6823505	6824225	Osmr (+448)
Dam-NKX2-5dHD_408	chr15	3975538	3976096	Oxct1 (-611)
Dam-NKX2-5dHD_409	chrX	8849245	8849613	Xk (-481)
Dam-NKX2-5dHD_410	chr13	51941554	51942010	Gadd45g (-262)
Dam-NKX2-5dHD_411	chr17	45822146	45822451	Mrpl14 (-1022), Tmem63b (+868)
Dam-NKX2-5dHD_412	chr1	71148919	71149290	Bard1 (+441)
Dam-NKX2-5dHD_413	chr5	147656543	147657263	Rasl11a (+256)
Dam-NKX2-5dHD_414	chr14	35403865	35404541	Ldb3 (-2336)
Dam-NKX2-5dHD_415	chr7	151798194	151798659	Fadd (-30086)
Dam-NKX2-5dHD_416	chr7	134072922	134073357	Kctd13 (+747)
Dam-NKX2-5dHD_417	chr15	76529818	76530070	Mfsd3 (-2028)
Dam-NKX2-5dHD_418	chr18	75526379	75526673	Smad7 (-493)
Dam-NKX2-5dHD_419	chr8	28371662	28372995	Eif4ebp1 (+1530)
Dam-NKX2-5dHD_420	chr8	23591316	23591997	AI316807 (-4306)
Dam-NKX2-5dHD_421	chr7	17492590	17493376	Ptgir (+1144)
Dam-NKX2-5dHD_422	chr1	135027300	135027995	Ppp1r15b (-95)
Dam-NKX2-5dHD_423	chr17	12934082	12934443	Slc22a1 (-65559), Igf2r (+28309)
Dam-NKX2-5dHD_424	chr14	99696724	99697199	Klf5 (-948)
Dam-NKX2-5dHD_425	chr5	89195042	89195543	Dck (+1255)
Dam-NKX2-5dHD_426	chr3	96044794	96045223	Hist2h3c1 (-4452), Hist2h3c1 (-1959), Hist2h2aa2 (-793)
Dam-NKX2-5dHD_427	chr7	19750763	19751158	Gipr (+515)
Dam-NKX2-5dHD_428	chr7	108467219	108467687	Stard10 (-2311)
Dam-NKX2-5dHD_429	chr4	116951773	116953003	Tmem53 (+27794)
Dam-NKX2-5dHD_430	chr11	58773237	58774010	Hist3h2bb-ps (-5610), Trim17 (-3659)
Dam-NKX2-5dHD_431	chr4	21806126	21806761	Coq3 (-378)
Dam-NKX2-5dHD_432	chr5	43630660	43631136	Cpeb2 (+6196)
Dam-NKX2-5dHD_433	chr2	75497938	75498372	Hnrnpa3 (+839)
Dam-NKX2-5dHD_434	chr5	30481592	30482070	Hadha (-311), Hadhb (-31)
Dam-NKX2-5dHD_435	chr9	90060019	90060335	Adamts7 (+2361)
Dam-NKX2-5dHD_436	chr1	36613944	36614387	Sema4c (+1060)
Dam-NKX2-5dHD_437	chr6	134847049	134847958	Cdkn1b (-22915), Gpr19 (-9627)
Dam-NKX2-5dHD_438	chr1	172815438	172815746	Dusp12 (+79)
Dam-NKX2-5dHD_439	chr8	113555022	113555460	Aars (-2626), Ddx19b (+410)
Dam-NKX2-5dHD_440	chr3	57377581	57378051	Wwtr1 (+2016)
Dam-NKX2-5dHD_441	chr4	147275133	147275486	Mfn2 (+3618), Fv1 (+32222)
Dam-NKX2-5dHD_442	chr11	97147391	97147671	Npepps (-5641)
Dam-NKX2-5dHD_443	chr10	120197151	120197665	NONE
Dam-NKX2-5dHD_444	chr1	31007025	31007323	Ptp4a1 (-574)
Dam-NKX2-5dHD_445	chr5	143583016	143583740	Tnrc18 (-4312)
Dam-NKX2-5dHD_446	chr3	89074140	89074418	Slc50a1 (+213)
Dam-NKX2-5dHD_447	chr15	43113949	43114238	Eif3e (+188)
Dam-NKX2-5dHD_448	chr3	107135726	107137202	Rbm15 (-257)
Dam-NKX2-5dHD_449	chr6	91160911	91161675	Fbln2 (-1465)
Dam-NKX2-5dHD_450	chr12	114379807	114380424	Crip2 (+1669)
Dam-NKX2-5dHD_451	chr11	59263358	59263686	Jmjd4 (-68), Snap47 (-64)
Dam-NKX2-5dHD_452	chr6	72737923	72738500	Tcf7l1 (+738)
Dam-NKX2-5dHD_453	chr11	75276470	75276804	Tlcd2 (-4944)
Dam-NKX2-5dHD_454	chr4	134478765	134479027	D4Wsu53e (-644)
Dam-NKX2-5dHD_455	chr17	29628865	29629577	Pim1 (+1231)
Dam-NKX2-5dHD_456	chrX	146893361	146893631	Alas2 (-88464), Tmem29 (-17816)
Dam-NKX2-5dHD_457	chr4	133958312	133959185	Stmn1 (-65486), Pafah2 (+6474)
Dam-NKX2-5dHD_458	chr9	106108299	106108548	Tlr9 (-16505), Twf2 (+2985)
Dam-NKX2-5dHD_459	chr4	129849592	129850150	Tinagl1 (+2175)
Dam-NKX2-5dHD_460	chr4	3605132	3605492	Lyn (+44)
Dam-NKX2-5dHD_461	chr17	24388470	24389010	Ccnf (-386)
Dam-NKX2-5dHD_462	chr5	115749392	115750012	Dynll1 (+1297)
Dam-NKX2-5dHD_463	chr1	133242050	133242340	Ikbke (-66055)
Dam-NKX2-5dHD_464	chr12	114375930	114376738	Crip2 (-2113)
Dam-NKX2-5dHD_465	chr16	17576608	17576873	Slc7a4 (+23)
Dam-NKX2-5dHD_466	chr11	100263729	100265018	Jup (-5321)
Dam-NKX2-5dHD_467	chr17	29406246	29406829	Ppil1 (-5622), BC004004 (+805)
Dam-NKX2-5dHD_468	chr2	165707673	165708399	Zmynd8 (+2152)
Dam-NKX2-5dHD_469	chr17	71880815	71881246	Ndc80 (-4834)
Dam-NKX2-5dHD_470	chr5	96802229	96802637	Fras1 (-541)
Dam-NKX2-5dHD_471	chr17	32487070	32487310	Akap8l (+332)
Dam-NKX2-5dHD_472	chr12	32185047	32185308	Cbll1 (-773)
Dam-NKX2-5dHD_473	chr12	9036270	9036974	Ttc32 (-181)
Dam-NKX2-5dHD_474	chr10	128359831	128360194	Rdh5 (-3660), Bloc1s1 (+567)
Dam-NKX2-5dHD_475	chr12	76920195	76920848	Syne2 (+1217)
Dam-NKX2-5dHD_476	chr9	44127543	44127871	C2cd2l (+658)
Dam-NKX2-5dHD_477	chr3	88297656	88298325	Sema4a (-32887), Lmna (+9263)
Dam-NKX2-5dHD_478	chr6	83106501	83106873	Wdr54 (-314), 1700003E16Rik (+289)
Dam-NKX2-5dHD_479	chr12	88067834	88068194	Angel1 (-604)
Dam-NKX2-5dHD_480	chr9	42914315	42914668	Arhgef12 (-691)
Dam-NKX2-5dHD_481	chr3	122432566	122432945	Pde5a (+680)
Dam-NKX2-5dHD_482	chr17	66296829	66297387	Ralbp1 (-62845), Twsg1 (+3419)
Dam-NKX2-5dHD_483	chr4	151382383	151382905	Klhl21 (-356)
Dam-NKX2-5dHD_484	chr15	79517367	79517833	Gtpbp1 (-3726), Josd1 (+702)
Dam-NKX2-5dHD_485	chr6	87994338	87994867	Rpn1 (-39864), Rab7 (-30911)
Dam-NKX2-5dHD_486	chrX	7476250	7476693	Pqbp1 (-118), Timm17b (-52)
Dam-NKX2-5dHD_487	chr1	43225830	43226473	Fhl2 (-5346)
Dam-NKX2-5dHD_488	chr4	135698538	135699332	Id3 (-802)
Dam-NKX2-5dHD_489	chr11	21902659	21902955	Otx1 (-1153)
Dam-NKX2-5dHD_490	chr4	141101127	141101506	Spen (-6805), Fblim1 (+54522)
Dam-NKX2-5dHD_491	chr3	51221094	51221422	Naa15 (+1320)
Dam-NKX2-5dHD_492	chr13	12291634	12292037	Ryr2 (-92624), Mtr (+58431)
Dam-NKX2-5dHD_493	chr5	137735553	137736072	Ufsp1 (-84)
Dam-NKX2-5dHD_494	chr1	122161757	122162123	Steap3 (-83)
Dam-NKX2-5dHD_495	chr9	103266218	103266465	Cdv3 (+1768)
Dam-NKX2-5dHD_496	chr15	34372687	34373339	Rpl30 (+18)
Dam-NKX2-5dHD_497	chr16	30059206	30059676	Hes1 (-6002)
Dam-NKX2-5dHD_498	chr5	34829909	34830229	Tnip2 (+26559), Fam193a (+66636)
Dam-NKX2-5dHD_499	chr2	118938781	118939110	Rad51 (+393)
Dam-NKX2-5dHD_500	chr1	122017017	122017344	3110009E18Rik (-583), Dbi (+315)
Dam-NKX2-5dHD_501	chr10	82276879	82277358	Nfyb (-50233), Txnrd1 (-19577)
Dam-NKX2-5dHD_502	chr8	11633208	11633594	Ankrd10 (+2353)
Dam-NKX2-5dHD_503	chr4	141435810	141436065	Efhd2 (-5103)
Dam-NKX2-5dHD_504	chr8	119518001	119518289	Gcsh (-796)
Dam-NKX2-5dHD_505	chr9	20972175	20972694	Pde4a (+2277)
Dam-NKX2-5dHD_506	chr1	133033612	133033984	Dyrk3 (+1013)
Dam-NKX2-5dHD_507	chr12	83714064	83714469	Rgs6 (-3758)
Dam-NKX2-5dHD_508	chr11	51419176	51419428	Hnrnpab (+1081)
Dam-NKX2-5dHD_509	chr2	164230369	164230699	Matn4 (-420), Rbpjl (+1840)
Dam-NKX2-5dHD_510	chr9	107499178	107499486	BY080835 (+74)
Dam-NKX2-5dHD_511	chr17	29232004	29232625	Cdkn1a (+1598)
Dam-NKX2-5dHD_512	chr11	97172228	97172616	Mrpl45 (-4608)
Dam-NKX2-5dHD_513	chr14	35125125	35125432	Fam35a (-1590), Glud1 (+1366)
Dam-NKX2-5dHD_514	chr8	42199232	42200405	Mtus1 (+19261)
Dam-NKX2-5dHD_515	chr11	87860216	87860521	Srsf1 (-804)
Dam-NKX2-5dHD_516	chr1	155038311	155038961	Lamc2 (-5059), Lamc2 (-5059)
Dam-NKX2-5dHD_517	chr11	83280857	83281262	Taf15 (-5550), Mmp28 (-4597)
Dam-NKX2-5dHD_518	chr6	54211135	54211490	Prr15 (-65693)
Dam-NKX2-5dHD_519	chr16	17235239	17235628	Hic2 (+1754)
Dam-NKX2-5dHD_520	chr4	149330034	149330402	Spsb1 (-1103)
Dam-NKX2-5dHD_521	chr2	32732989	32733388	Fam129b (+1535)
Dam-NKX2-5dHD_522	chr2	13479131	13479485	Vim (-16630), Trdmt1 (-13017)
Dam-NKX2-5dHD_523	chr19	53216362	53216616	Add3 (-1998)
Dam-NKX2-5dHD_524	chr4	128803259	128803633	Hpca (-4911)
Dam-NKX2-5dHD_525	chr18	75856373	75856689	Gm672 (+819)
Dam-NKX2-5dHD_526	chr4	135695611	135696391	Id3 (-3736)
Dam-NKX2-5dHD_527	chr1	193813017	193813265	Rd3 (+11887)
Dam-NKX2-5dHD_528	chr1	169280157	169280590	Aldh9a1 (+252)
Dam-NKX2-5dHD_529	chr7	52151668	52151984	Med25 (-4090), Fuz (+377)
Dam-NKX2-5dHD_530	chr19	45122322	45122848	Pdzd7 (-2323), Sfxn3 (+519)
Dam-NKX2-5dHD_531	chr12	36883542	36883906	Bzw2 (-312), Ankmy2 (+13)
Dam-NKX2-5dHD_532	chr5	30889352	30889645	Kcnk3 (-1044)
Dam-NKX2-5dHD_533	chr6	106750188	106750438	Crbn (-245)
Dam-NKX2-5dHD_534	chr4	46402012	46402547	5830415F09Rik (+15)
Dam-NKX2-5dHD_535	chr4	106581645	106582987	Ssbp3 (-1759)
Dam-NKX2-5dHD_536	chr11	109511249	109511617	Prkar1a (-830)
Dam-NKX2-5dHD_537	chr17	24137065	24137915	Prss22 (-2423)
Dam-NKX2-5dHD_538	chr5	114893903	114894262	Mvk (-232), Mmab (-47)
Dam-NKX2-5dHD_539	chr5	100403184	100403674	Hnrnpd (+4528)
Dam-NKX2-5dHD_540	chr6	135301985	135302489	Pbp2 (-41835), Emp1 (-10712)
Dam-NKX2-5dHD_541	chr7	133540106	133540463	Nfatc2ip (-34)
Dam-NKX2-5dHD_542	chr11	54711089	54711518	Gpx3 (-5051)
Dam-NKX2-5dHD_543	chr4	141633449	141633900	Fhad1 (-66109), Tmem51 (+6544)
Dam-NKX2-5dHD_544	chr9	22030071	22030534	Zfp809 (+156)
Dam-NKX2-5dHD_545	chr11	117690045	117690706	Tk1 (-3048)
Dam-NKX2-5dHD_546	chr13	12197544	12198190	Ryr2 (+1345)
Dam-NKX2-5dHD_547	chr1	75395895	75396367	Gmppa (-36387), Speg (+24259)
Dam-NKX2-5dHD_548	chr10	94784787	94785908	Cradd (+1383)
Dam-NKX2-5dHD_549	chr1	52170302	52170744	Stat1 (-5759)
Dam-NKX2-5dHD_550	chr11	77329389	77329966	Trp53i13 (-2903), Abhd15 (+1059)
Dam-NKX2-5dHD_551	chr11	77990093	77991050	Nek8 (-404), Tlcd1 (+114)
Dam-NKX2-5dHD_552	chr4	124386091	124386629	Sf3a3 (-5745)
Dam-NKX2-5dHD_553	chr4	154774080	154774361	Gabrd (-2043)
Dam-NKX2-5dHD_554	chr9	57614104	57614426	Clk3 (-598)
Dam-NKX2-5dHD_555	chr4	133312896	133313798	Arid1a (-3821)
Dam-NKX2-5dHD_556	chr2	19473945	19474375	4921504E06Rik (+1377)
Dam-NKX2-5dHD_557	chr19	47654883	47655218	Slk (+542)
Dam-NKX2-5dHD_558	chr11	100801110	100801495	Stat3 (-478)
Dam-NKX2-5dHD_559	chr6	120785695	120786603	Bcl2l13 (-99)
Dam-NKX2-5dHD_560	chr14	21298345	21299254	Anxa7 (+555)
Dam-NKX2-5dHD_561	chr19	10113149	10113905	Fads3 (-2511)
Dam-NKX2-5dHD_562	chr17	15637279	15637560	Psmb1 (-2180), Tbp (+568)
Dam-NKX2-5dHD_563	chr11	4998206	4998501	Rhbdd3 (-1087), Ewsr1 (+726)
Dam-NKX2-5dHD_564	chr2	180069818	180070278	Gata5 (-664)
Dam-NKX2-5dHD_565	chr15	88850517	88851092	Panx2 (-39351), Mov10l1 (+37381)
Dam-NKX2-5dHD_566	chr16	93831999	93832355	Morc3 (-189)
Dam-NKX2-5dHD_567	chr14	63866498	63867466	Gata4 (-2885)
Dam-NKX2-5dHD_568	chr11	95171807	95172336	Myst2 (-512)
Dam-NKX2-5dHD_569	chr8	13287859	13288183	Tmco3 (+8), Dcun1d2 (+105)
Dam-NKX2-5dHD_570	chr4	104780948	104781409	Prkaa2 (+1324)
Dam-NKX2-5dHD_571	chr6	127059520	127059821	9630033F20Rik (-101)
Dam-NKX2-5dHD_572	chr4	133742754	133743162	Ccdc21 (+42)
Dam-NKX2-5dHD_573	chr12	25393849	25394139	Rrm2 (+875)
Dam-NKX2-5dHD_574	chr12	106799992	106800465	Bdkrb2 (-1153)
Dam-NKX2-5dHD_575	chr3	107949016	107949303	Gnai3 (-128)
Dam-NKX2-5dHD_576	chr3	145315028	145315702	Cyr61 (-2416)
Dam-NKX2-5dHD_577	chr13	118392972	118393271	Hcn1 (+1995)
Dam-NKX2-5dHD_578	chr6	125141522	125142495	Ncapd2 (-405), Mrpl51 (-209)
Dam-NKX2-5dHD_579	chr15	79154117	79154396	Baiap2l2 (-38318), Pla2g6 (+4544)
Dam-NKX2-5dHD_580	chr11	74645949	74646229	Mnt (+1663)
Dam-NKX2-5dHD_581	chr9	44728607	44728954	Atp5l (+44)
Dam-NKX2-5dHD_582	chr8	3515903	3516198	Pnpla6 (+667)
Dam-NKX2-5dHD_583	chr17	24664819	24665102	Traf7 (-78)
Dam-NKX2-5dHD_584	chr14	26514978	26515265	Ppif (+1466)
Dam-NKX2-5dHD_585	chr13	24853821	24854152	Gmnn (-181)
Dam-NKX2-5dHD_586	chr7	118129345	118129710	Ctr9 (-42937), Mrvi1 (-39827)
Dam-NKX2-5dHD_587	chr7	126937581	126937874	Eri2 (-156), 2610020H08Rik (+84)
Dam-NKX2-5dHD_588	chr11	65982112	65982574	Dnahc9 (-290)
Dam-NKX2-5dHD_589	chr1	173177492	173178139	Adamts4 (-2737), Ndufs2 (-573)
Dam-NKX2-5dHD_590	chr9	57610747	57611845	Clk3 (+2371)
Dam-NKX2-5dHD_591	chr11	6342774	6343357	H2afv (+1380)
Dam-NKX2-5dHD_592	chr19	5844541	5845134	Scyl1 (-73437), Frmd8 (+30370)
Dam-NKX2-5dHD_593	chr11	115865298	115865566	Galk1 (+8601), Itgb4 (+29393)
Dam-NKX2-5dHD_594	chr1	180330952	180331267	Efcab2 (-4902)
Dam-NKX2-5dHD_595	chrX	98577532	98577884	Gjb1 (+5032), Zmym3 (+37853)
Dam-NKX2-5dHD_596	chr9	44215530	44215716	Rps25 (-174), Trappc4 (+8)
Dam-NKX2-5dHD_597	chr15	74502320	74502640	Arc (+520)
Dam-NKX2-5dHD_598	chr4	132313009	132313416	Smpdl3b (-127)
Dam-NKX2-5dHD_599	chr10	79315713	79316096	Ptbp1 (-1445)
Dam-NKX2-5dHD_600	chr2	165908722	165909262	Sulf2 (+72164), Ncoa3 (+90855)
Dam-NKX2-5dHD_601	chr9	106182830	106183076	Poc1a (-439)
Dam-NKX2-5dHD_602	chr15	27505215	27505510	Fam105b (+55085)
Dam-NKX2-5dHD_603	chr15	102503785	102504269	Atp5g2 (-2549)
Dam-NKX2-5dHD_604	chr1	58086352	58086890	Aox1 (-192)
Dam-NKX2-5dHD_605	chrX	137490466	137490785	Atg4a (-830), Psmd10 (+624)
Dam-NKX2-5dHD_606	chr2	30702128	30702370	Prrx2 (+1362)
Dam-NKX2-5dHD_607	chr11	9018008	9018414	Upp1 (+200)
Dam-NKX2-5dHD_608	chr15	76180283	76180955	Maf1 (-1105), Sharpin (+921)
Dam-NKX2-5dHD_609	chr11	102269832	102270367	Slc25a39 (-1269)
Dam-NKX2-5dHD_610	chr4	132069537	132069974	Sesn2 (-3385)
Dam-NKX2-5dHD_611	chr3	104667475	104667723	St7l (-400), Capza1 (-176)
Dam-NKX2-5dHD_612	chr8	109818825	109819154	Nfat5 (+1620)
Dam-NKX2-5dHD_613	chr2	163245586	163246050	Jph2 (-22132), Gdap1l1 (-18385)
Dam-NKX2-5dHD_614	chr11	86922356	86923353	Prr11 (-639), Fam33a (+92)
Dam-NKX2-5dHD_615	chr7	80686428	80686755	Chd2 (+40)
Dam-NKX2-5dHD_616	chr15	98860312	98860722	Tuba1c (+195)
Dam-NKX2-5dHD_617	chr12	88228952	88229329	6430527G18Rik (-3377)
Dam-NKX2-5dHD_618	chr11	3813284	3813598	Slc35e4 (+1226)
Dam-NKX2-5dHD_619	chr7	35014946	35015362	Gpi1 (+170)
Dam-NKX2-5dHD_620	chr10	41238139	41238547	Cd164 (-963)
Dam-NKX2-5dHD_621	chr5	137551360	137551626	Serpine1 (-3351)
Dam-NKX2-5dHD_622	chr17	29170073	29170620	Srsf3 (+742)
Dam-NKX2-5dHD_623	chr12	107246578	107247232	Vrk1 (-1568)
Dam-NKX2-5dHD_624	chr7	52383988	52384387	Rps11 (-4429), Rpl13a (-83)
Dam-NKX2-5dHD_625	chr3	62143583	62144563	Arhgef26 (+1374)
Dam-NKX2-5dHD_626	chr1	179725831	179726160	Adss (+644)
Dam-NKX2-5dHD_627	chr3	145312783	145313170	Cyr61 (-28)
Dam-NKX2-5dHD_628	chr5	125871841	125872497	Ubc (-1782)
Dam-NKX2-5dHD_629	chr2	30837348	30837918	BC005624 (-172), Usp20 (-166)
Dam-NKX2-5dHD_630	chr15	98764084	98764478	Tuba1b (+540)
Dam-NKX2-5dHD_631	chr4	124808378	124808857	Zc3h12a (-3493)
Dam-NKX2-5dHD_632	chr17	78597410	78598096	Crim1 (-1835)
Dam-NKX2-5dHD_633	chr11	102993151	102993459	Hexim2 (-1348)
Dam-NKX2-5dHD_634	chr11	100831291	100831773	Ptrf (+399)
Dam-NKX2-5dHD_635	chr11	98951395	98951728	Tns4 (-942)
Dam-NKX2-5dHD_636	chr5	140864425	140864872	Snx8 (+552)
Dam-NKX2-5dHD_637	chr10	79604681	79605122	Midn (-6133), Dos (-4770), Atp5d (-158)
Dam-NKX2-5dHD_638	chr4	125779741	125780230	Stk40 (-1215)
Dam-NKX2-5dHD_639	chr14	55556441	55557135	Cmtm5 (+1481)
Dam-NKX2-5dHD_640	chr11	97604097	97604486	Pip4k2b (+1726)
Dam-NKX2-5dHD_641	chr5	143582061	143582558	Tnrc18 (-3244)
Dam-NKX2-5dHD_642	chr10	126748804	126749191	Mars (-156)
Dam-NKX2-5dHD_643	chr9	21142482	21142795	Slc44a2 (+367)
Dam-NKX2-5dHD_644	chr5	136019998	136020511	Hip1 (+737)
Dam-NKX2-5dHD_645	chr7	119898051	119898913	Tead1 (+75648)
Dam-NKX2-5dHD_646	chr9	107830970	107831254	4921517D21Rik (+312)
Dam-NKX2-5dHD_647	chr18	76218778	76219058	NONE
Dam-NKX2-5dHD_648	chr6	108611092	108611460	Bhlhe40 (+653)
Dam-NKX2-5dHD_649	chr11	120810853	120811492	Slc16a3 (+1375)
Dam-NKX2-5dHD_650	chr8	108662052	108662623	Esrp2 (-1464)
Dam-NKX2-5dHD_651	chr8	59807146	59807567	Hand2 (+7577)
Dam-NKX2-5dHD_652	chr11	75465471	75466100	Myo1c (-3731)
Dam-NKX2-5dHD_653	chr9	110854525	110855145	Tdgf1 (-6173), Lrrc2 (+786)
Dam-NKX2-5dHD_654	chr7	148031289	148031608	Odf3 (-2366), Scgb1c1 (-15)
Dam-NKX2-5dHD_655	chr15	27396957	27397248	Ank (+671)
Dam-NKX2-5dHD_656	chr9	95412396	95412651	2610101N10Rik (-109)
Dam-NKX2-5dHD_657	chr5	34063887	34064150	Fgfr3 (-936)
Dam-NKX2-5dHD_658	chr19	56533363	56533615	9930023K05Rik (-2638)
Dam-NKX2-5dHD_659	chr7	106505192	106505813	Serpinh1 (-3754)
Dam-NKX2-5dHD_660	chr4	118109742	118110248	Cdc20 (-47)
Dam-NKX2-5dHD_661	chr2	153476046	153476308	Dnmt3b (+987)
Dam-NKX2-5dHD_662	chr5	143668425	143668960	Actb (-290)
Dam-NKX2-5dHD_663	chr6	50516239	50516665	Cycs (+21)
Dam-NKX2-5dHD_664	chr12	113833337	113833675	Adssl1 (-24752), Inf2 (+6511)
Dam-NKX2-5dHD_665	chr4	151532324	151532616	Espn (-6154), Hes2 (-506)
Dam-NKX2-5dHD_666	chr2	153319186	153319580	8430427H17Rik (+36324)
Dam-NKX2-5dHD_667	chr1	136914088	136914330	Ube2t (+55055), Lgr6 (+87644)
Dam-NKX2-5dHD_668	chr12	106795679	106796407	Bdkrb2 (-5339)
Dam-NKX2-5dHD_669	chr8	120807861	120808306	Cdh13 (+429)
Dam-NKX2-5dHD_670	chr9	50562348	50562636	Hspb2 (-2033), Cryab (+1629)
Dam-NKX2-5dHD_671	chr11	57916792	57917616	Cnot8 (-451)
Dam-NKX2-5dHD_672	chr6	17012833	17013189	Tes (-2138)
Dam-NKX2-5dHD_673	chr3	95497410	95497751	Adamtsl4 (-5800)
Dam-NKX2-5dHD_674	chr14	31941969	31942417	Nt5dc2 (-5846), 2010107H07Rik (-77)
Dam-NKX2-5dHD_675	chr19	6334714	6335544	Map4k2 (-6121), Men1 (+150)
Dam-NKX2-5dHD_676	chr16	24395134	24395454	Lpp (-52883)
Dam-NKX2-5dHD_677	chr5	143025699	143026063	Radil (+1150)
Dam-NKX2-5dHD_678	chr7	28041940	28042535	Numbl (-1542)
Dam-NKX2-5dHD_679	chr19	9163177	9163430	Scgb1a1 (-858)
Dam-NKX2-5dHD_680	chr4	155177485	155177777	Mrpl20 (-96)
Dam-NKX2-5dHD_681	chr9	106270028	106270358	Dusp7 (-770)
Dam-NKX2-5dHD_682	chr3	127485897	127486211	Alpk1 (-2609)
Dam-NKX2-5dHD_683	chr6	17256533	17257063	Cav1 (+428)
Dam-NKX2-5dHD_684	chr18	20712300	20712637	Dsg2 (-4148)
Dam-NKX2-5dHD_685	chr5	101249891	101250143	Fam175a (-63)
Dam-NKX2-5dHD_686	chr1	137640306	137640653	Phlda3 (-22182), Csrp1 (+14706)
Dam-NKX2-5dHD_687	chr9	108356321	108356798	Ccdc71 (-6289)
Dam-NKX2-5dHD_688	chr14	21515530	21515851	Fut11 (+1501)
Dam-NKX2-5dHD_689	chr13	38253889	38254370	Snrnp48 (-42678), Dsp (+10967)
Dam-NKX2-5dHD_690	chr2	13496010	13496266	Vim (+200)
Dam-NKX2-5dHD_691	chr17	32527977	32529024	Wiz (-3739)
Dam-NKX2-5dHD_692	chr5	38870910	38871827	Slc2a9 (+3255)
Dam-NKX2-5dHD_693	chr12	10398040	10398448	Rdh14 (+658)
Dam-NKX2-5dHD_694	chr12	56499451	56499917	Psma6 (-128)
Dam-NKX2-5dHD_695	chr3	51365065	51365530	Setd7 (-553)
Dam-NKX2-5dHD_696	chr14	70579801	70580052	Pdlim2 (-2448)
Dam-NKX2-5dHD_697	chr2	164595210	164595677	Ube2c (+15)
Dam-NKX2-5dHD_698	chr5	122730618	122731535	Pptc7 (-3330)
Dam-NKX2-5dHD_699	chr5	135662483	135663029	Baz1b (-437)
Dam-NKX2-5dHD_700	chr18	61557684	61557946	Ppargc1b (+2270)
Dam-NKX2-5dHD_701	chr10	77532203	77532524	Icosl (+251)
Dam-NKX2-5dHD_702	chr11	115865868	115866542	Galk1 (+7828), Itgb4 (+30166)
Dam-NKX2-5dHD_703	chr15	84000237	84000476	Pnpla3 (+2111)
Dam-NKX2-5dHD_704	chr8	46743887	46744466	NONE
Dam-NKX2-5dHD_705	chr14	57190571	57190919	Parp4 (-3711), Cenpj (-62)
Dam-NKX2-5dHD_706	chr9	20807420	20807664	Mrpl4 (+361)
Dam-NKX2-5dHD_707	chr2	163297981	163298442	Fitm2 (+153)
Dam-NKX2-5dHD_708	chr3	96328495	96329185	Hfe2 (-268)
Dam-NKX2-5dHD_709	chr13	81849293	81849643	Mblac2 (-948), Polr3g (+544)
Dam-NKX2-5dHD_710	chr12	70259930	70260247	Rps29 (+84)
Dam-NKX2-5dHD_711	chr11	60165929	60166165	Lrrc48 (-835), Tom1l2 (+360)
Dam-NKX2-5dHD_712	chr9	90058312	90058671	Adamts7 (+676)
Dam-NKX2-5dHD_713	chr17	34055917	34056241	Tapbp (-344)
Dam-NKX2-5dHD_714	chr4	151690075	151690356	Rnf207 (+2518), Icmt (+18756)
Dam-NKX2-5dHD_715	chr1	134437560	134437845	Cntn2 (+1814)
Dam-NKX2-5dHD_716	chr15	77801787	77802376	Eif3d (-828)
Dam-NKX2-5dHD_717	chr9	22233820	22234284	9530077C05Rik (+18031), rp9 (+38748)
Dam-NKX2-5dHD_718	chr2	152740302	152740680	Mylk2 (+3403), Foxs1 (+18453)
Dam-NKX2-5dHD_719	chr7	108450103	108450434	Atg16l2 (+333)
Dam-NKX2-5dHD_720	chr11	100406851	100407172	Ttc25 (+66)
Dam-NKX2-5dHD_721	chr2	156902705	156903497	9830001H06Rik (+1900)
Dam-NKX2-5dHD_722	chr4	125880156	125880476	Thrap3 (-362)
Dam-NKX2-5dHD_723	chr9	110379335	110379744	Klhl18 (-342), Kif9 (+42)
Dam-NKX2-5dHD_724	chr6	72186468	72186825	Atoh8 (-1076)
Dam-NKX2-5dHD_725	chr1	122012635	122013076	3110009E18Rik (-4908), Dbi (+4640)
Dam-NKX2-5dHD_726	chr4	125843109	125843502	1700029G01Rik (-2721)
Dam-NKX2-5dHD_727	chr19	5912543	5912801	Dpf2 (+194)
Dam-NKX2-5dHD_728	chr11	102957017	102957405	Acbd4 (-5791), Plcd3 (+5761)
Dam-NKX2-5dHD_729	chr2	155418492	155418821	Gss (-215)
Dam-NKX2-5dHD_730	chr11	35652381	35653144	Rars (-4733)
Dam-NKX2-5dHD_731	chr15	80085091	80085455	Atf4 (-341)
Dam-NKX2-5dHD_732	chr8	87502825	87503117	Junb (-354)
Dam-NKX2-5dHD_733	chr6	30252281	30252658	Gm2058 (+2069)
Dam-NKX2-5dHD_734	chr19	56624079	56624340	Dclre1a (-1694), Nhlrc2 (+1459)
Dam-NKX2-5dHD_735	chr13	63664731	63664985	Ptch1 (+1970)
Dam-NKX2-5dHD_736	chr7	29164033	29164322	Plekhg2 (-6497), Zfp36 (+69)
Dam-NKX2-5dHD_737	chr9	107981667	107982283	Mst1 (-792), Rnf123 (-269)
Dam-NKX2-5dHD_738	chr5	120121962	120122213	Tbx3 (+1410)
Dam-NKX2-5dHD_739	chr12	74145403	74145651	Six1 (+2172)
Dam-NKX2-5dHD_740	chr16	49854711	49854954	Cd47 (-934)
Dam-NKX2-5dHD_741	chr15	11836586	11836942	Npr3 (-1335)
Dam-NKX2-5dHD_742	chr6	28429794	28430228	Snd1 (-337)
Dam-NKX2-5dHD_743	chr3	32715862	32716112	Usp13 (-561)
Dam-NKX2-5dHD_744	chr15	58911528	58911961	Mtss1 (+1836)
Dam-NKX2-5dHD_745	chr2	53050864	53051329	Prpf40a (-876), Arl6ip6 (-21)
Dam-NKX2-5dHD_746	chr12	16903160	16903906	Rock2 (+1749)
Dam-NKX2-5dHD_747	chr7	117770448	117770741	Adm (-588)
Dam-NKX2-5dHD_748	chr17	34046687	34047223	Zbtb22 (-6166), Daxx (+409)
Dam-NKX2-5dHD_749	chr14	47503803	47504380	Samd4 (+1452)
Dam-NKX2-5dHD_750	chr9	44134874	44135156	Dpagt1 (+87)
Dam-NKX2-5dHD_751	chr11	50083709	50083982	Ltc4s (-31873), Maml1 (+21992)
Dam-NKX2-5dHD_752	chr5	136471840	136472114	Dtx2 (+1230)
Dam-NKX2-5dHD_753	chr7	4100896	4101356	Leng9 (+348)
Dam-NKX2-5dHD_754	chr14	22315627	22315982	Myst4 (-3271)
Dam-NKX2-5dHD_755	chrX	50342814	50343203	Hprt (+1754)
Dam-NKX2-5dHD_756	chr4	141641018	141641284	Tmem51 (-932)
Dam-NKX2-5dHD_757	chr6	34267659	34268007	Akr1b3 (-344)
Dam-NKX2-5dHD_758	chr7	26065302	26065517	Cic (+12692), Pafah1b3 (+17564)
Dam-NKX2-5dHD_759	chr9	20833746	20834028	Icam5 (-2595), Icam4 (+70)
Dam-NKX2-5dHD_760	chr18	12280119	12280713	6030446N20Rik (-454)
Dam-NKX2-5dHD_761	chr1	20910693	20911271	Efhc1 (-30725), Paqr8 (+30279)
Dam-NKX2-5dHD_762	chr6	71634434	71634999	Kdm3a (-52037), Reep1 (-23137)
Dam-NKX2-5dHD_763	chr6	145069736	145070192	Lrmp (-295)
Dam-NKX2-5dHD_764	chr12	86115625	86115941	Npc2 (-1721), Isca2 (+1563)
Dam-NKX2-5dHD_765	chr8	67169601	67169957	Cpe (+2058)
Dam-NKX2-5dHD_766	chr6	29866717	29867266	Fam40b (-21)
Dam-NKX2-5dHD_767	chr5	20878071	20878341	Fgl2 (-285)
Dam-NKX2-5dHD_768	chr9	59136122	59136654	Adpgk (-2991)
Dam-NKX2-5dHD_769	chr5	123587972	123588286	Rhof (-5491), Setd1b (-4073)
Dam-NKX2-5dHD_770	chr5	121037052	121037372	Iqcd (-1820), Tpcn1 (+1410)
Dam-NKX2-5dHD_771	chr5	123585913	123586607	Setd1b (-5942), Rhof (-3622)
Dam-NKX2-5dHD_772	chr2	179849474	179849767	Osbpl2 (-4450)
Dam-NKX2-5dHD_773	chr4	151384895	151385185	Klhl21 (+2040)
Dam-NKX2-5dHD_774	chr14	47441100	47442156	Gmfb (+289)
Dam-NKX2-5dHD_775	chr2	31944583	31944952	Ppapdc3 (-6403), Fam78a (-5543)
Dam-NKX2-5dHD_776	chr12	109609293	109609749	Eml1 (-51505), Cyp46a1 (+36930)
Dam-NKX2-5dHD_777	chr11	70832759	70833009	Mis12 (-229), Derl2 (-119)
Dam-NKX2-5dHD_778	chr12	99976607	99976947	Ptpn21 (-1162)
Dam-NKX2-5dHD_779	chr3	20053800	20054386	Gyg (+902)
Dam-NKX2-5dHD_780	chr7	26171414	26172295	Cnfn (-17112), Lipe (+9151)
Dam-NKX2-5dHD_781	chr11	115264861	115265189	Ict1 (-55)
Dam-NKX2-5dHD_782	chr11	101524788	101525108	Arl4d (-1907)
Dam-NKX2-5dHD_783	chr11	102080787	102081144	Hdac5 (+10520), G6pc3 (+29953)
Dam-NKX2-5dHD_784	chr19	3325184	3325793	Cpt1a (+2188)
Dam-NKX2-5dHD_785	chr11	68908419	68908672	Per1 (-5114)
Dam-NKX2-5dHD_786	chr3	145311672	145312077	Cyr61 (+1074)
Dam-NKX2-5dHD_787	chr10	87842842	87843134	Gnptab (+831)
Dam-NKX2-5dHD_788	chr16	17276429	17276788	Tmem191c (+216)
Dam-NKX2-5dHD_789	chr2	118508585	118508939	Pak6 (+5780), Gm1337 (+20937)
Dam-NKX2-5dHD_790	chr4	147222563	147222823	Zfp933 (-209)
Dam-NKX2-5dHD_791	chr15	11833497	11833768	Npr3 (+1796)
Dam-NKX2-5dHD_792	chr5	122960516	122960843	Atp2a2 (-8446)
Dam-NKX2-5dHD_793	chr5	104183557	104183886	Aff1 (+541)
Dam-NKX2-5dHD_794	chr7	135666047	135666510	Bag3 (-818)

## Sheet: 4- Dam-NKX2-5YRD
chromosome	start	end
chr7	123337167	123338014
chr4	119088788	119090620
chr2	178147298	178148539
chr19	10113149	10114159
chr3	144227460	144228097
chr11	6422660	6423602
chr16	98178579	98179515
chr6	120938154	120938542
chr11	6094095	6095029
chr11	6503629	6504271
chr14	102193635	102195263
chr11	97639237	97640142
chr1	154470743	154471479
chr1	173180746	173181044
chr19	4941005	4941614
chr6	30519947	30520847
chr11	72952056	72952355
chr14	35317094	35318029
chr9	107830819	107831469
chr9	88177390	88178134
chr15	83262671	83264449
chr2	21127793	21128510
chr15	79662639	79663310
chr1	74795709	74796574
chr1	9620553	9622111
chr7	134025158	134026239
chr7	116758175	116759046
chr5	150439408	150440318
chr1	58086317	58087602
chr11	65549703	65550646
chr6	17581568	17581966
chr7	128218088	128219142
chr1	75358312	75358994
chr17	35835515	35836291
chr5	35255867	35257048
chr13	38242237	38243001
chr2	152162742	152163064
chr11	55284728	55285573
chr14	35318357	35318654
chr3	51258266	51258810
chr5	133020574	133021119
chr17	43939958	43941778
chr3	122124206	122125057
chr2	154483448	154484545
chr5	89359112	89360105
chr7	108112990	108113534
chr11	65083570	65084085
chr17	66296599	66297423
chr6	49212435	49213018
chr15	84862253	84862809
chr7	108983922	108984269
chr17	71348836	71349506
chr9	118747992	118748341
chr8	106920201	106920868
chr1	180184920	180185805
chr9	100934007	100934430
chr6	114871081	114871650
chrX	157207042	157207482
chr8	14907782	14908531
chr5	124109170	124110462
chr6	35274517	35276243
chr1	52770859	52771340
chr11	80112237	80112617
chr16	34994282	34994983
chr4	102798407	102799252
chr8	90721948	90722826
chr14	120725051	120725671
chr14	22316146	22317287
chr6	34986881	34987713
chr4	35165771	35166128
chr2	155431430	155432212
chr2	84548407	84548880
chr7	88999311	88999929
chr5	149739080	149739439
chr10	87321624	87322775
chr8	108416541	108417056
chr1	73981953	73982378
chr3	28161031	28161757
chr2	77007791	77008334
chr4	124574764	124576402
chr1	43221959	43222632
chr7	117912956	117913896
chr9	37322219	37323086
chr2	112333808	112334329
chr11	3273388	3274441
chr8	75874976	75876323
chr11	116407603	116408159
chr8	123155796	123157225
chr11	69289697	69290663
chr6	114859016	114859500
chr3	86978984	86979459
chr8	125869901	125870606
chr11	109473547	109474219
chr13	67585253	67585767
chr2	76635492	76636703
chr17	72129588	72130341
chr5	139857766	139859182
chr3	40825827	40826988
chr15	6826833	6827316
chr17	12966749	12967647
chr1	133241711	133242973
chr7	119902465	119903432
chr19	45060207	45060683
chr17	23819115	23819789
chr12	99976362	99976987
chr12	72953178	72953951
chr7	142887762	142888630
chr1	140516551	140516965
chr17	29372782	29373888
chr15	86043290	86044071
chr8	37677688	37678634
chr15	81638030	81638447
chr14	54981000	54981347
chr5	74593052	74593486
chr3	85354817	85356034
chr5	21210735	21211364
chr4	46068048	46068602
chr5	64552809	64553624
chr5	31211846	31212407
chr4	88166694	88167184
chr5	151096600	151098042
chr6	34267591	34269228
chr3	108185224	108186121
chr15	78686400	78687230
chr6	38333039	38333506
chr1	117996567	117997520
chr4	134089712	134090217
chr5	139854831	139855540
chr11	46337712	46337960
chr3	126298398	126299123
chr6	115626841	115627261
chr5	147651236	147651897
chr7	119365290	119365700
chr17	79453439	79453984
chr12	52794863	52795531
chr8	109818723	109819270
chr8	107055791	107056407
chr5	108066372	108066832
chr4	128966729	128967151
chr8	96849572	96850509
chr7	128846114	128847219
chr3	146163990	146164795
chr13	49439114	49439439
chr8	67367310	67367885
chr14	21617130	21617795
chr11	72432636	72433249
chr4	124477702	124478698
chr9	44153787	44154231
chr19	3766727	3767265
chr9	21529340	21530131
chr1	191991694	191992473
chr5	25002916	25003374
chr8	126043256	126044144
chr1	134208276	134208768
chr12	3233991	3234735
chr17	65960395	65960720
chr5	93237191	93237930
chr3	89080062	89080435
chr16	96301981	96302672
chr3	121672523	121673215
chr12	106795715	106796261
chrX	34530053	34530688
chr8	15058849	15060125
chr18	24871905	24872459
chr4	135698400	135699332
chr4	149329860	149330624
chr15	32273283	32273898
chr11	58595757	58596279
chr6	115787748	115788682
chr8	86175718	86176119
chr6	71830097	71830611
chr1	99994481	99995075
chr1	43590781	43591923
chr4	9569424	9570462
chr8	46745507	46746301
chr19	29772421	29772999
chr15	98326364	98326665
chr5	147655677	147656110
chr11	72423379	72423776
chr4	108674717	108675622
chr11	78001366	78001833
chr2	25186859	25187225
chr15	3974650	3975200
chr13	49679599	49680439
chr10	84295999	84297053
chr8	128007311	128008426
chr1	9789365	9789782
chr15	81976480	81977169
chr4	53409568	53411360
chr5	76372449	76373055
chr4	46068943	46069417
chr1	173084606	173084927
chr15	66720251	66721350
chr8	46972802	46973311
chr17	27773709	27773999
chr1	182121187	182122176
chr6	146592977	146593485
chr19	31836839	31837634
chr17	80459300	80460209
chr11	121092323	121092613
chr15	3923363	3923868
chr15	99552645	99553366
chr12	78064315	78064793
chr6	22196877	22197421
chr5	93113962	93114575
chr5	66087159	66087770
chr5	115307518	115308167
chr5	151995992	151996695
chr2	153473430	153474143
chr11	3061015	3061875
chr7	54117075	54117330
chr9	21071195	21071547
chr19	57687357	57687792
chr19	24140143	24140960
chr7	130138196	130139163
chr7	80691289	80691728
chr19	56791711	56792067
chr19	46205313	46205672
chr17	45823690	45824099
chr17	49964576	49965605
chr8	74086026	74086359
chr4	10802922	10803703
chr12	8309603	8310584
chr1	78815145	78815574
chr18	73733943	73734359
chr6	32400466	32401298
chr14	67625572	67625974
chr10	66745563	66746526
chr7	31456647	31457046
chrX	132527039	132527563
chr5	72893259	72894940
chr13	64374525	64375448
chr9	50549605	50549965
chr2	32277897	32278958
chr14	31939968	31940391
chr11	58856465	58856888
chr6	115726306	115726709
chrX	166414833	166415396
chr16	18214997	18216295
chr5	124422403	124423131
chr1	137155335	137155705
chr10	53068156	53069423
chr4	138634907	138635231
chr2	25053294	25053731
chr6	14852874	14853593
chr4	106077788	106078464
chr12	53980545	53981568
chr7	97542936	97543908
chr11	79959405	79959785
chr9	43894954	43895463
chr1	88369661	88370467
chr3	89006572	89006856
chr5	137745436	137746016
chr6	3347888	3348440
chr4	129055689	129055978
chr8	119503972	119504313
chr6	113494092	113494574
chr14	32017554	32018358
chr4	132685662	132685993
chr7	104228492	104228982
chr19	53526966	53527421
chr8	122511723	122512483
chr1	90999990	91000321
chr5	23917508	23918568
chr6	117864501	117864993
chr17	26848233	26848651
chr4	140935663	140935998
chr15	83297794	83298555
chr16	94746401	94747060
chr9	7833959	7834398
chr9	21431652	21432160
chr8	67365749	67366253
chr9	37463939	37464650
chr11	106127006	106127294
chr11	78642176	78642517
chr18	42356794	42357158
chr4	104780908	104781452
chr17	82136861	82138491
chr3	116265232	116265910
chr4	138689034	138689288
chr11	70502201	70502628
chr5	122959467	122960588
chr10	120197014	120197734
chr9	111023219	111024478
chr13	93382585	93382987
chr9	108471230	108471858
chr7	75293897	75294828
chr1	66982646	66983149
chr4	134051900	134052395
chr17	50645946	50646526
chr8	26641457	26641714
chr6	34990323	34990912
chr18	80517919	80518521
chr1	120405226	120406207
chr1	137277266	137277586
chr14	22663591	22663857
chr1	133645562	133646334
chr4	104826508	104827366
chr10	79483161	79483503
chr4	151669504	151669924
chr1	93242750	93243407
chr8	109456300	109456793
chr19	5429243	5430516
chr14	122934776	122935435
chr6	14708132	14708611
chr10	53070416	53070753
chr4	134088664	134089060
chr5	30340278	30340536
chr12	4883993	4884249
chr5	122297807	122298138
chr7	116926115	116927804
chr3	97463283	97464311
chr8	109460954	109461244
chr6	83965134	83965863
chr16	34995823	34996175
chr5	115637089	115638041
chr16	92464572	92465223
chr17	41016490	41017433
chr1	99656029	99657847
chr1	108608112	108608692
chr11	88718016	88718789
chr9	74823153	74823564
chr9	24579728	24580192
chr7	130511145	130511667
chr5	114441466	114441901
chr11	93745646	93746154
chr10	42222749	42223153
chr15	83265180	83266130
chr9	100980016	100980606
chr6	38496937	38497822
chr2	165617790	165618731
chr6	128385127	128386133
chr16	4622929	4623638
chr16	4727071	4727488
chr1	169236947	169237689
chr1	155147392	155148439
chr10	62922093	62922592
chr5	31602682	31603373
chr9	13235658	13235904
chr7	77501794	77502693
chr19	17032098	17032568
chr1	33963316	33963671
chr7	86419025	86419979
chr2	38144810	38145603
chr1	159107225	159108014
chr4	53645984	53646808
chr7	117260086	117260554
chr2	165722118	165722631
chr7	75894476	75894922
chr11	115950061	115950357
chr7	118224177	118224585
chr4	106042490	106042921
chr12	86291589	86292167
chr16	90282112	90282590
chr10	86168119	86168838
chr11	78136758	78137231
chr2	6807560	6807912
chr4	148036513	148036885
chr1	180729028	180729645
chr19	36806423	36807559
chr6	134966127	134966625
chrX	39252412	39252767
chr5	73945079	73945371
chr1	134442600	134443064
chr15	31465752	31466335
chr13	102536007	102536628
chr16	13353043	13353517
chr4	135843452	135843701
chr9	92171084	92171894
chr11	62467274	62467997
chr13	105017681	105018556
chr1	34065140	34065498
chr9	111336464	111337142
chr9	21177772	21178289
chr12	70890664	70891072
chr19	40529165	40530356
chr19	5392857	5393186
chr17	66852212	66852905
chr4	82697151	82697453
chr17	85355958	85356705
chr1	166390849	166392205
chr15	98930112	98930447
chr6	54984079	54984539
chr8	125708546	125708896
chr9	108501143	108501971
chr16	43368417	43368774
chr15	98437553	98438118
chr4	137022894	137023775
chr11	72488538	72489242
chr14	47439427	47439851
chr11	105452526	105453613
chr19	5324543	5324908
chr5	130731255	130731567
chr15	102548052	102548403
chr5	89362415	89362889
chr9	90059208	90060298
chr7	139766303	139766603
chr3	32718727	32719008
chr17	87358898	87359926
chr17	35957732	35958331
chr8	122260928	122261454
chr7	142889496	142889897
chr6	71635394	71635825
chr14	46090582	46091363
chr11	79065974	79066353
chr16	91546738	91547018
chrX	54037986	54038639
chr1	57904573	57904878
chr4	99380843	99381356
chr6	134778917	134779166
chr1	134213644	134214292
chr7	133630604	133631047
chr1	62709235	62709896
chr5	35105186	35105585
chr16	94827128	94828104
chr11	88710328	88710839
chr3	121745655	121746488
chr12	4849940	4850281
chr1	173274942	173275274
chr3	84021642	84022014
chr4	151385547	151385800
chr5	135165528	135165785
chr3	107565016	107565304
chr6	146725385	146726383
chr10	93106155	93106412
chr10	34018376	34018905
chr12	55890162	55890460
chr8	108406987	108407308
chr5	139474661	139475378
chr11	105071340	105071947
chr12	109724324	109724830
chr10	126520745	126521302
chr6	38791906	38792959
chr1	181079462	181080067
chr3	86804504	86804893
chr4	148544632	148545107
chr5	5692030	5692382
chr7	119368223	119368598
chr11	98241117	98241517
chr3	121424376	121425116
chr9	97013615	97014011
chr15	37391568	37392143
chr7	80893367	80893935
chr2	76820951	76821405
chr9	42914355	42914812
chr1	137621447	137621765
chr5	121901175	121901749
chr3	32415165	32415527
chr8	125855318	125855864
chr17	30000813	30001077
chr14	25957858	25958179
chr1	193196277	193196671
chr5	122827012	122827449
chr9	49055701	49056054
chr12	77895811	77896130
chr8	46025284	46025758
chr16	8470081	8470602
chr6	51278397	51278898
chr11	116977007	116977271
chr8	128189976	128190392
chr2	6245417	6245780
chr8	108535608	108536335
chr7	28229768	28230513
chr15	98769464	98769827
chr3	145884878	145885199
chr10	66563777	66564752
chr8	107117450	107118689
chr1	77059741	77060393
chr15	98971836	98972235
chr4	131983425	131984119
chr8	64237402	64237905
chr16	46008409	46009103
chr16	64768698	64769147
chr7	116761569	116762173
chr7	118123505	118124895
chr1	93135546	93136045
chr16	89568889	89569382
chr9	51769462	51770303
chr4	55018910	55019174
chr8	108207266	108207921
chr1	108611888	108612336
chr11	75229164	75229619
chrX	131337823	131338172
chr4	155002657	155003187
chr12	76921224	76921791
chr5	143025109	143026196
chr5	124420062	124420650
chr8	97379406	97379702
chr12	119541824	119542405
chr11	95452822	95453163
chr6	134872811	134873170
chr7	150285924	150286347
chr1	75537197	75537516
chr2	35040757	35041375
chrX	39505366	39505904
chr4	101929281	101930043
chr2	73223158	73223844
chr15	76870225	76870707
chr12	87084396	87084848
chr9	74819437	74819800
chr4	149576630	149577149
chr14	32004553	32005227
chr7	148642462	148642714
chr15	11836872	11837495
chr4	108077644	108078085
chr17	24610128	24610446
chr18	34367792	34368693
chrX	11737797	11738229
chr8	80029130	80029720
chr3	32637403	32637837
chr8	108018291	108019654
chr6	36986436	36986734
chr11	94849486	94850284
chr10	75399687	75399973
chr3	132972169	132972584
chr2	146218460	146218904
chr2	68307864	68308154
chr1	157900472	157901005
chr2	179757031	179757328
chr16	3885957	3886261
chr12	73185004	73185341
chr9	41036308	41037240
chr11	101524857	101525108
chr1	79666049	79666306
chr6	135312128	135312542
chr11	60623791	60624375
chr3	121428727	121429049
chr7	77495069	77495364
chr11	95243560	95243882
chr19	36195282	36195722
chr12	4346495	4346840
chr16	33735439	33735805
chr14	70553661	70553945
chr9	22280397	22280735
chr8	127184775	127185098
chr19	56890451	56891156
chr10	43619644	43619899
chr10	93662367	93662773
chr13	38248810	38249428
chr8	122636803	122637143
chr18	39154936	39155321
chr19	7092348	7093211
chr8	127278458	127279089
chr7	20356954	20357327
chr7	108258859	108259752
chr6	34549814	34550412
chr16	92052870	92053181
chr7	56554192	56554763
chr1	173276959	173277208
chr11	70817080	70817449
chr19	57390844	57391358
chr17	79756606	79756957
chr8	59989101	59989741
chr17	33917158	33917686
chr11	47192966	47193871
chr1	44175454	44176031
chr6	66851444	66852303
chr7	54089160	54089406
chr15	97595686	97596113
chr17	5237780	5238551
chr17	46966770	46967372
chr5	124998402	124999065
chr16	16215414	16215884
chr19	4791426	4792048
chr4	131978647	131978874
chr7	117263731	117264070
chr9	95651674	95651968
chr4	115839891	115840523
chr4	147375297	147375753
chr8	108164314	108164844
chr14	65994656	65995133
chr11	77956057	77956749
chr9	115217369	115217748
chr13	8884347	8884638
chr7	38965029	38965651
chr4	131632039	131632457
chr11	40505351	40505599
chr18	5044011	5044337
chr17	28316373	28316696
chr8	108038095	108038520
chr3	100774697	100775053
chr3	89263310	89263714
chr2	148705825	148706295
chr15	35598968	35599486
chr2	148556469	148556975
chr1	66980388	66980759
chr11	78133735	78134570
chr10	12675589	12676621
chr14	65072028	65072374
chr4	41453309	41453676
chr15	81683998	81684354
chr7	119897854	119898876
chr17	26853864	26854527
chr3	151812142	151812527
chrX	71070648	71070946
chr8	13908880	13909285
chr4	33294874	33295369
chr8	46033353	46033685
chr13	94946053	94946467
chr7	28291673	28292393
chr2	32285328	32285835
chr11	83280857	83281262
chr1	137697738	137698272
chr9	15515977	15516373
chr4	55019692	55020016
chr5	92760075	92761208
chr3	51367069	51367537
chr7	146098686	146099426
chr11	72256431	72256905
chr18	15223494	15224103
chr17	82079365	82079928
chr8	42075883	42076624
chr4	118775381	118775785
chr1	120429638	120430106
chr17	74925555	74926116
chr11	20729197	20729524
chr5	89008190	89008945
chr16	94596017	94596524
chr4	108672600	108673004
chr3	103541439	103541715
chr13	93912483	93913324
chr4	120079276	120079597
chr2	180889010	180889265
chr12	53977146	53977501
chr14	73723400	73723915
chr12	80127963	80128213
chr11	62943599	62944183
chr12	35730878	35731191
chr4	106924802	106925076
chr12	103200808	103201050
chr6	118078869	118079168
chr11	100799237	100799606
chr7	88256290	88256940
chr5	68236313	68236715
chr19	41279447	41279739
chr3	104585837	104586161
chr11	59425410	59425844
chr7	130124934	130125214
chr3	96807159	96807727
chr11	94342542	94343150
chr11	97558180	97558461
chr11	118150284	118150650
chr4	140770193	140770447
chr4	132325332	132325642
chr1	31007791	31008379
chr8	73029424	73029982
chr16	35871842	35872123
chr5	144381688	144382306
chr14	120721494	120722168
chr11	100387834	100388121
chr14	75534911	75535406
chr17	35644445	35645035
chr3	146606600	146607115
chr9	22216715	22218009
chr8	26919368	26919612
chr5	73791565	73792026
chr14	22665881	22666327
chr3	126301536	126302093
chr6	58972846	58973373
chr4	88784172	88785051
chr19	43990701	43991216
chr1	55675339	55675688
chr2	120394980	120395319
chr5	100403674	100404136
chr18	46372955	46373358
chrX	48372784	48373097
chr1	108073496	108073821
chr2	26155395	26155658
chr17	82139714	82140261
chr11	77711421	77712371
chr8	108702366	108702813
chr14	35404830	35405127
chr3	57097523	57098315
chr8	59310944	59311600
chr8	129114984	129115302
chr8	130879885	130880203
chr13	83735244	83735558
chr11	74642055	74642421
chr19	5484509	5484765
chr11	103796840	103797228
chr3	105607066	105607710
chr19	57295725	57296078
chr4	148848742	148849254
chr10	83994529	83994860
chr14	61877210	61877677
chr7	140066538	140067007
chr19	41666562	41667063
chr19	43748006	43748330
chr1	62727589	62728225
chr11	116272228	116272866
chr8	108415251	108415639
chr3	79087985	79088280
chr1	16640799	16641403
chr11	59285087	59285344
chr4	32834410	32834939
chr2	14970370	14970681
chr2	181413901	181414289
chr13	46593547	46594228
chr4	46072929	46073392
chr8	109589010	109589262
chr16	20674706	20675366
chr5	28399655	28400293
chr11	98667931	98668344
chr17	57168769	57169059
chr11	90111589	90112035
chr7	132989755	132990074
chr11	96661586	96662005
chr10	127747534	127748165
chr4	129379622	129380058
chr19	6304223	6304521
chr4	151368125	151368614
chr15	81636400	81636888
chr17	27309763	27310218
chr14	45896071	45896491
chrX	70722981	70723348
chr9	37239052	37239345
chr13	47200265	47200520
chr5	91321861	91322797
chr8	109725657	109726018
chr10	66687839	66688231
chr2	116948349	116948650
chr2	166879027	166879323
chr1	43788269	43788767
chr17	43942338	43943054
chr1	167122204	167122512
chr11	72228885	72229169
chr13	49407689	49407979
chr6	134931094	134931347
chr1	170354535	170354993
chr8	26310601	26310932
chr9	50539472	50539874
chr11	45580649	45580975
chr7	13621757	13622154
chr13	12293771	12294543
chr4	115816128	115816726
chr8	129474281	129474775
chr3	137643655	137644087
chr5	145841984	145842318
chr5	5266122	5266463
chr9	44220874	44221126
chr16	38523423	38523885
chr7	97535304	97535864
chr12	86696156	86696457
chr14	26406031	26406478
chr1	174026928	174027487
chr7	119167968	119168378
chr7	146036578	146037391
chr2	121982310	121982831
chr5	24105222	24105704
chr10	13587551	13587943
chrX	156063490	156063749
chr3	97471317	97471892
chrX	165755825	165756223
chr7	29604539	29604901
chr6	86947796	86948217
chr17	34043676	34043934
chr7	52615545	52616019
chr15	32276023	32276723
chr11	84631536	84631954
chr11	69207767	69208119
chr9	44009320	44009656
chr12	81286819	81287355
chr3	95497410	95497751
chr11	101985997	101986310
chr12	55758001	55758566
chr4	116984910	116985255
chr7	80892604	80892966
chr9	119230064	119230385
chr11	116485992	116487143
chr4	88366310	88366646
chr10	110919579	110919932
chr6	113493353	113493611
chr2	90908943	90909290
chr11	53883535	53883863
chr17	81780372	81780906
chr6	87989493	87989747
chr9	59466150	59466539
chr8	130881664	130882176
chr12	8701392	8701741
chr8	126002278	126002824
chr15	3973916	3974218
chrX	166417750	166418804
chr8	125932544	125933154
chr14	120676476	120676827
chr1	75518363	75518645
chr5	92761715	92762138
chr14	21439305	21440134
chr5	115506648	115507046
chr1	66981958	66982218
chr9	106152013	106152471
chr12	4135636	4136091
chr19	40690970	40691272
chr4	140209090	140209356
chr8	126037342	126038147
chr13	93915382	93915866
chr7	54080551	54081207
chr14	57655355	57655654
chr1	120317257	120318182
chr1	134210045	134210687
chr4	131437116	131437404
chr4	123589964	123590426
chr1	136004873	136005415
chr13	115883363	115883960
chr2	32393318	32393651
chr10	13586158	13586416
chr19	46412205	46412523
chr11	69176024	69176490
chr5	115540232	115540515
chr3	122691891	122692237
chr19	4627188	4627475
chr8	13781121	13781661
chr7	105985208	105985569
chr16	94587557	94587814
chr11	94191315	94191570
chr16	44015277	44015935
chr3	143862688	143863016
chr4	119207518	119207959
chr6	24554813	24555151
chr14	21744873	21745346
chr17	46285362	46285755
chr11	76757974	76758752
chr5	110710436	110711177
chr16	76374999	76375766
chr11	102693089	102693383
chr1	38184585	38184838
chr17	45874970	45875423
chr16	92397777	92398172
chr14	55723949	55724210
chr17	28491685	28491987
chr2	130533950	130534478
chr4	132349876	132350489
chr7	117007375	117007634
chr9	44691481	44691752
chr1	82439232	82439562
chr17	25096565	25096882
chr1	135553451	135553704
chr6	38072747	38073177
chr17	5116208	5116805
chr3	40508122	40508308
chr14	31439903	31440451
chr7	30753271	30753641
chr10	87964774	87965057
chr1	155151848	155152509
chr16	91621978	91622230
chr19	40904647	40904977
chr8	42220423	42220787
chr11	107411953	107412540
chrX	130829597	130829853
chr2	181195915	181196512
chr3	105508974	105509223
chr9	59135973	59136556
chr2	181229913	181230247
chr6	83084769	83085018
chr12	86692523	86692775
chrX	54034544	54035067
chr17	28830630	28831034
chr2	25480425	25481002
chr6	39325444	39325804
chr12	56594171	56594804
chr14	21616249	21616637
chr3	19854628	19854879
chr4	9571792	9572367
chr6	59160530	59161017
chr8	25548736	25549019
chr10	87323924	87324241
chr5	43630765	43631175
chr4	125922666	125922938
chr3	122685481	122685735
chr3	104853966	104854223
chr3	101890185	101890591
chr10	20033825	20034181
chr2	124948112	124948366
chr7	59115918	59116501
chr19	47653001	47653286
chr18	42421882	42422137
chr15	89001736	89001981
chr15	82855935	82856182
chr1	75387023	75387467
chrX	148608015	148608387
chr15	66802207	66802580
chr3	52069796	52070083
chr1	95654838	95655238
chr3	103662630	103662957
chr11	119311710	119311968
chr3	84397121	84397391
chr4	107642468	107642837
chr17	46912469	46913038
chr1	52555855	52556322
chr8	111240001	111240439
chr2	119725170	119725584
chr2	157837846	157838296
chr5	121093569	121094107
chr4	98064146	98064457
chr14	56115343	56115609
chr15	74538658	74538914
chr15	76095607	76096080
chr2	148704267	148704660
chr3	137525880	137526444
chr3	96656210	96656607
chr2	146237259	146237550
chr17	29493063	29493531
chr6	128251268	128251557
chr9	107583269	107583552
chr9	23024098	23024888
chr3	83644093	83644554
chr11	108206251	108206735
chr19	56463601	56463920
chr11	76035197	76035454
chr11	115467552	115467848
chr7	138016183	138016591
chrX	99840219	99841009
chr10	86166619	86166911
chr18	35718737	35719083
chr4	115692679	115693009
chr10	61179278	61179685
chr9	57111076	57111374
chr12	25782533	25782858
chr5	130618626	130619097
chr5	149361665	149361910
chrX	137212088	137212408
chr8	126831580	126832287
chr1	43226272	43226648
chr11	45694738	45695085
chr1	55749991	55750454
chr15	79516206	79517066
chr4	136019181	136019434
chr1	6202799	6203301
chr6	39508767	39509261
chr3	100486936	100487313
chr16	92460707	92461052
chr11	8393216	8393457
chr5	29897082	29897405
chr10	127541633	127542147
chr16	93602613	93602860
chr11	102912063	102912762
chr3	53458207	53458462
chr16	27390480	27390799
chr2	90743771	90744098
chr3	38381854	38382370
chrX	92672742	92673339
chr6	8458519	8458782
chr4	118890432	118890923
chr5	75439299	75439616
chr12	77499184	77499440
chr9	108164119	108164650
chr12	76915740	76916053
chr16	46011033	46011286
chr3	137805569	137805887
chr11	74708291	74708585
chr9	110957991	110958708
chr12	112279199	112279650
chr15	99050949	99051534
chr7	30981360	30981684
chr2	13478963	13479449
chr1	43215178	43215502
chr16	21919227	21919514
chr5	115876972	115877462
chr2	32279244	32279581
chr11	101527762	101528114
chr2	153459265	153459525
chr11	77891754	77892029
chr2	92026416	92026873
chrX	117041935	117042399
chr6	117117888	117118170
chr10	58137130	58137555
chr15	11328094	11328430
chr10	93126164	93126774
chr6	56744896	56745531
chr17	66474224	66474849
chr11	59949723	59950819
chr17	75891285	75891878
chr9	102909540	102909800
chr11	45870611	45870867
chr15	100324115	100324385
chr4	9575811	9576104
chr13	54725290	54725622
chr1	193199909	193200339
chr11	97173430	97173732
chr5	104185425	104185783
chr14	58418946	58419306
chr11	88920457	88920777
chr16	91374178	91374572
chrX	45781543	45781981
chr9	119933530	119934187
chr1	36119251	36119604
chr11	115261276	115261664
chr19	60834216	60834679
chr5	34196271	34196622
chr7	6106052	6106349
chr12	88727288	88727605
chr17	79734942	79735185
chr4	154934698	154934994
chr2	32547919	32548285
chr6	30518318	30518649
chr17	56213301	56213596
chr5	136471802	136472078
chr5	65828317	65828646
chr2	113876193	113876453
chr4	141573899	141574299
chr15	98508226	98509040
chr1	128725474	128725812
chr7	107915496	107915829
chrX	160946509	160946778
chr10	66561960	66562338
chr19	46135577	46135980
chr5	144073725	144073986
chr11	59597006	59597514
chr12	8976775	8977610
chr1	72923843	72924138
chr2	17959181	17959433
chr1	137611951	137612208
chr6	124729892	124730139
chr1	162969356	162969633
chr2	179714437	179714919
chr19	42231205	42231507
chr2	76487158	76487437
chr1	20910544	20911125
chr12	4041723	4042258
chr16	8470874	8471486
chr3	151854848	151855252
chr10	60847528	60847773
chr13	70774570	70775320
chr8	122669089	122669443
chr19	41339527	41339898
chr1	74334782	74335047
chr8	109102180	109102496
chr12	3832580	3833040
chr18	39082805	39083168
chr6	29413564	29414300
chr17	15961640	15961997

## Sheet: 5 - Dam-ELK1
peak	chromosome	start	end
Dam-ELK1_1	chrX	20513342	20514369
Dam-ELK1_2	chr9	30234735	30235317
Dam-ELK1_3	chr10	66999729	67000755
Dam-ELK1_4	chr9	20956953	20958543
Dam-ELK1_5	chr7	128218165	128219405
Dam-ELK1_6	chr17	34763106	34763851
Dam-ELK1_7	chr11	120578255	120579731
Dam-ELK1_8	chr15	74508201	74508930
Dam-ELK1_9	chr4	154594172	154595947
Dam-ELK1_10	chr5	142939199	142939768
Dam-ELK1_11	chr1	74410607	74411187
Dam-ELK1_12	chr14	26514380	26515412
Dam-ELK1_13	chr4	154390456	154391054
Dam-ELK1_14	chr2	157192591	157193425
Dam-ELK1_15	chr11	69208455	69209316
Dam-ELK1_16	chr8	107165413	107165927
Dam-ELK1_17	chr7	146437970	146438627
Dam-ELK1_18	chr12	16899763	16900711
Dam-ELK1_19	chr3	105674989	105675581
Dam-ELK1_20	chr3	87331234	87332945
Dam-ELK1_21	chr9	65042991	65044077
Dam-ELK1_22	chr4	57928235	57928855
Dam-ELK1_23	chr8	126818629	126819576
Dam-ELK1_24	chr15	76190246	76191340
Dam-ELK1_25	chr1	157404588	157404928
Dam-ELK1_26	chr5	144983541	144983872
Dam-ELK1_27	chr16	11252236	11253225
Dam-ELK1_28	chr17	72101378	72102566
Dam-ELK1_29	chr2	80419117	80420352
Dam-ELK1_30	chr4	137213775	137214626
Dam-ELK1_31	chr18	46757577	46758392
Dam-ELK1_32	chr12	114392233	114393760
Dam-ELK1_33	chr15	99360993	99361683
Dam-ELK1_34	chr11	54680731	54681564
Dam-ELK1_35	chr11	78136192	78137267
Dam-ELK1_36	chr7	149573936	149574727
Dam-ELK1_37	chr3	96723372	96724240
Dam-ELK1_38	chr4	147532611	147533134
Dam-ELK1_39	chr9	108166700	108167368
Dam-ELK1_40	chr17	29406140	29406937
Dam-ELK1_41	chr14	21493865	21495044
Dam-ELK1_42	chr15	36721297	36722409
Dam-ELK1_43	chr1	34496316	34496830
Dam-ELK1_44	chr11	119959978	119960893
Dam-ELK1_45	chr16	32608067	32608917
Dam-ELK1_46	chr9	21807324	21808671
Dam-ELK1_47	chr5	107715867	107716877
Dam-ELK1_48	chr4	133652690	133653541
Dam-ELK1_49	chr6	113388763	113389393
Dam-ELK1_50	chr1	184447949	184448532
Dam-ELK1_51	chr12	114103570	114104987
Dam-ELK1_52	chr1	9534915	9535541
Dam-ELK1_53	chr8	125090958	125091693
Dam-ELK1_54	chr4	135700139	135701264
Dam-ELK1_55	chr11	75399159	75399963
Dam-ELK1_56	chr11	95171541	95172196
Dam-ELK1_57	chr6	88851043	88851506
Dam-ELK1_58	chr1	16094337	16095082
Dam-ELK1_59	chr7	19991382	19992012
Dam-ELK1_60	chr7	29096046	29096608
Dam-ELK1_61	chr2	58420132	58420633
Dam-ELK1_62	chr12	31269473	31270582
Dam-ELK1_63	chr5	122045025	122045398
Dam-ELK1_64	chr3	90034749	90035372
Dam-ELK1_65	chr4	155385217	155386414
Dam-ELK1_66	chr2	156907191	156908697
Dam-ELK1_67	chr12	56593988	56594771
Dam-ELK1_68	chr11	60590570	60592334
Dam-ELK1_69	chr8	32221382	32222067
Dam-ELK1_70	chr1	30824297	30824953
Dam-ELK1_71	chr8	124986094	124988272
Dam-ELK1_72	chr2	156902113	156903233
Dam-ELK1_73	chr10	98722324	98724016
Dam-ELK1_74	chr4	129601469	129602003
Dam-ELK1_75	chr15	80217194	80217550
Dam-ELK1_76	chr1	87691000	87691573
Dam-ELK1_77	chr7	19801410	19802474
Dam-ELK1_78	chr11	60748281	60749871
Dam-ELK1_79	chr7	29580707	29581717
Dam-ELK1_80	chr11	45757270	45757842
Dam-ELK1_81	chr11	78158857	78159464
Dam-ELK1_82	chr4	126921230	126922050
Dam-ELK1_83	chr19	5636391	5637116
Dam-ELK1_84	chr15	102034806	102035354
Dam-ELK1_85	chr4	115815910	115816878
Dam-ELK1_86	chr10	83994460	83995618
Dam-ELK1_87	chr15	76553413	76555024
Dam-ELK1_88	chr11	98491978	98492633
Dam-ELK1_89	chr17	33897242	33897847
Dam-ELK1_90	chr15	99082374	99082962
Dam-ELK1_91	chr11	75466100	75467236
Dam-ELK1_92	chr11	79100236	79101529
Dam-ELK1_93	chr12	112616736	112617257
Dam-ELK1_94	chr15	73543527	73543888
Dam-ELK1_95	chr11	98220024	98220936
Dam-ELK1_96	chr6	73010008	73010480
Dam-ELK1_97	chr1	66908556	66909296
Dam-ELK1_98	chr8	96923145	96923534
Dam-ELK1_99	chr4	151234518	151235021
Dam-ELK1_100	chr8	90886509	90887426
Dam-ELK1_101	chr4	129109703	129110350
Dam-ELK1_102	chr11	94853844	94855227
Dam-ELK1_103	chr9	121550276	121550844
Dam-ELK1_104	chr17	56427706	56428007
Dam-ELK1_105	chr2	119301981	119302651
Dam-ELK1_106	chr6	86321099	86322022
Dam-ELK1_107	chr10	126631656	126632158
Dam-ELK1_108	chr11	59780661	59781816
Dam-ELK1_109	chr12	88541414	88542145
Dam-ELK1_110	chr2	32426076	32426385
Dam-ELK1_111	chr12	113853436	113854482
Dam-ELK1_112	chr19	3999327	4000400
Dam-ELK1_113	chr12	114313372	114314325
Dam-ELK1_114	chr15	98467505	98467985
Dam-ELK1_115	chr3	120995670	120996840
Dam-ELK1_116	chr12	109607991	109609121
Dam-ELK1_117	chr6	88850428	88850679
Dam-ELK1_118	chr4	132195440	132195893
Dam-ELK1_119	chr10	79689893	79690572
Dam-ELK1_120	chr15	75759145	75760045
Dam-ELK1_121	chr8	107846414	107847234
Dam-ELK1_122	chr2	29102202	29102916
Dam-ELK1_123	chr11	65619959	65620529
Dam-ELK1_124	chr13	55423382	55424833
Dam-ELK1_125	chr14	21167836	21168479
Dam-ELK1_126	chr9	45636129	45637184
Dam-ELK1_127	chr11	51661741	51662890
Dam-ELK1_128	chr2	30061425	30062844
Dam-ELK1_129	chr8	87502565	87503822
Dam-ELK1_130	chr6	85865291	85865779
Dam-ELK1_131	chr13	59758004	59758723
Dam-ELK1_132	chr12	119080491	119080795
Dam-ELK1_133	chr7	30980081	30981684
Dam-ELK1_134	chr9	42914284	42914777
Dam-ELK1_135	chr15	78940333	78941168
Dam-ELK1_136	chr11	61530289	61530939
Dam-ELK1_137	chr17	46815995	46816502
Dam-ELK1_138	chr15	97082992	97083497
Dam-ELK1_139	chr11	94928384	94929163
Dam-ELK1_140	chr17	35957949	35959225
Dam-ELK1_141	chr8	27267959	27268498
Dam-ELK1_142	chr11	118115373	118115729
Dam-ELK1_143	chr4	43591685	43592597
Dam-ELK1_144	chr11	69357533	69358184
Dam-ELK1_145	chr12	113832228	113834207
Dam-ELK1_146	chrX	139117389	139117781
Dam-ELK1_147	chr7	54051859	54052187
Dam-ELK1_148	chr3	88129007	88129778
Dam-ELK1_149	chr10	78037878	78038427
Dam-ELK1_150	chr7	4783153	4783857
Dam-ELK1_151	chr12	83267384	83267981
Dam-ELK1_152	chr11	53591347	53591831
Dam-ELK1_153	chr1	184448915	184449450
Dam-ELK1_154	chr11	96849391	96850093
Dam-ELK1_155	chr11	59653428	59654287
Dam-ELK1_156	chr8	108519294	108520185
Dam-ELK1_157	chr1	134175902	134176621
Dam-ELK1_158	chr17	5493623	5494264
Dam-ELK1_159	chr9	96897571	96898038
Dam-ELK1_160	chr7	28589119	28590399
Dam-ELK1_161	chr2	31801634	31802169
Dam-ELK1_162	chr8	75877601	75878456
Dam-ELK1_163	chr7	4497330	4498659
Dam-ELK1_164	chr3	105490863	105491982
Dam-ELK1_165	chr11	4022469	4024708
Dam-ELK1_166	chr16	91367101	91367838
Dam-ELK1_167	chr9	102984313	102984885
Dam-ELK1_168	chr11	83001530	83002363
Dam-ELK1_169	chr5	121899062	121899600
Dam-ELK1_170	chr2	131181667	131182030
Dam-ELK1_171	chr11	82683928	82684449
Dam-ELK1_172	chr4	132088425	132089044
Dam-ELK1_173	chr4	106977278	106977611
Dam-ELK1_174	chr4	155266784	155268268
Dam-ELK1_175	chr7	28142004	28142919
Dam-ELK1_176	chr6	127404407	127404998
Dam-ELK1_177	chr3	87651295	87652051
Dam-ELK1_178	chr9	57610708	57612291
Dam-ELK1_179	chr11	68666861	68668374
Dam-ELK1_180	chr11	107407059	107407699
Dam-ELK1_181	chr1	182499882	182500942
Dam-ELK1_182	chr8	4259829	4260237
Dam-ELK1_183	chr3	115709471	115709910
Dam-ELK1_184	chr8	86794027	86794504
Dam-ELK1_185	chr4	40089825	40090084
Dam-ELK1_186	chr11	77843691	77845384
Dam-ELK1_187	chr4	155204091	155205710
Dam-ELK1_188	chr7	134004904	134006287
Dam-ELK1_189	chr17	23810323	23810816
Dam-ELK1_190	chr7	3644655	3645375
Dam-ELK1_191	chr11	119775542	119776638
Dam-ELK1_192	chr11	78566598	78567516
Dam-ELK1_193	chr15	76455509	76456553
Dam-ELK1_194	chr4	128799455	128800247
Dam-ELK1_195	chr10	34002517	34003006
Dam-ELK1_196	chr18	36919599	36920007
Dam-ELK1_197	chr8	123062350	123063319
Dam-ELK1_198	chr1	134213478	134214452
Dam-ELK1_199	chr1	173084369	173084927
Dam-ELK1_200	chr8	72653762	72654342
Dam-ELK1_201	chr4	108564889	108565352
Dam-ELK1_202	chr14	47690155	47690825
Dam-ELK1_203	chr3	88425789	88426370
Dam-ELK1_204	chr9	119469310	119469653
Dam-ELK1_205	chr17	27701770	27702494
Dam-ELK1_206	chr17	47824412	47824961
Dam-ELK1_207	chr15	5058003	5058852
Dam-ELK1_208	chr8	64240369	64240823
Dam-ELK1_209	chr14	63380665	63381520
Dam-ELK1_210	chr19	4096378	4097233
Dam-ELK1_211	chr8	108691777	108692611
Dam-ELK1_212	chr10	120196973	120197633
Dam-ELK1_213	chr11	102158925	102159565
Dam-ELK1_214	chr5	135539246	135540167
Dam-ELK1_215	chr10	79314527	79315121
Dam-ELK1_216	chr8	97057632	97059140
Dam-ELK1_217	chr11	101441193	101442306
Dam-ELK1_218	chr5	88982680	88983270
Dam-ELK1_219	chr13	81848547	81849643
Dam-ELK1_220	chr3	138189137	138189940
Dam-ELK1_221	chr1	92850794	92851117
Dam-ELK1_222	chr7	133935061	133935584
Dam-ELK1_223	chr1	184213542	184213832
Dam-ELK1_224	chr14	71033732	71034258
Dam-ELK1_225	chr4	135613646	135613996
Dam-ELK1_226	chr7	132695978	132696798
Dam-ELK1_227	chr5	148672566	148673173
Dam-ELK1_228	chr2	128954438	128955166
Dam-ELK1_229	chr8	116158977	116160137
Dam-ELK1_230	chr3	107748945	107749512
Dam-ELK1_231	chr19	40344747	40345280
Dam-ELK1_232	chr6	113569511	113570273
Dam-ELK1_233	chr12	36883649	36884761
Dam-ELK1_234	chr8	23970711	23971607
Dam-ELK1_235	chr8	86132680	86133277
Dam-ELK1_236	chr14	32137502	32138048
Dam-ELK1_237	chrX	131291275	131291870
Dam-ELK1_238	chr19	6398935	6399405
Dam-ELK1_239	chr17	31995195	31996038
Dam-ELK1_240	chr9	106723371	106724041
Dam-ELK1_241	chr11	70460815	70461710
Dam-ELK1_242	chr11	19819587	19820349
Dam-ELK1_243	chr8	67169344	67170096
Dam-ELK1_244	chr2	113688614	113689096
Dam-ELK1_245	chr2	155417171	155417882
Dam-ELK1_246	chr6	120772243	120772932
Dam-ELK1_247	chr2	27370137	27370707
Dam-ELK1_248	chr4	117001393	117001792
Dam-ELK1_249	chr11	84336257	84337444
Dam-ELK1_250	chr3	94846249	94847473
Dam-ELK1_251	chr16	35938408	35939596
Dam-ELK1_252	chr15	102033099	102033622
Dam-ELK1_253	chr2	181413718	181414667
Dam-ELK1_254	chr11	69223669	69224107
Dam-ELK1_255	chr5	23898753	23899744
Dam-ELK1_256	chr14	55583736	55584622
Dam-ELK1_257	chr8	73298236	73298562
Dam-ELK1_258	chr8	11558647	11560074
Dam-ELK1_259	chr17	25170599	25171546
Dam-ELK1_260	chr16	18812016	18812475
Dam-ELK1_261	chr18	60787145	60787807
Dam-ELK1_262	chr17	35336467	35337867
Dam-ELK1_263	chr4	41516836	41517407
Dam-ELK1_264	chr16	90142617	90142992
Dam-ELK1_265	chr18	36930565	36930968
Dam-ELK1_266	chr11	6445788	6446220
Dam-ELK1_267	chr7	28126544	28127399
Dam-ELK1_268	chr12	82958343	82959150
Dam-ELK1_269	chr4	117029172	117029706
Dam-ELK1_270	chr19	47654722	47655318
Dam-ELK1_271	chr2	152120030	152120605
Dam-ELK1_272	chr9	107775489	107775868
Dam-ELK1_273	chr7	138078464	138079556
Dam-ELK1_274	chr9	74823116	74823564
Dam-ELK1_275	chr15	78359087	78359525
Dam-ELK1_276	chr19	3707706	3708102
Dam-ELK1_277	chr4	132070828	132071702
Dam-ELK1_278	chr9	79809285	79809716
Dam-ELK1_279	chr7	88049841	88050426
Dam-ELK1_280	chr3	107566159	107566652
Dam-ELK1_281	chr6	115946869	115947701
Dam-ELK1_282	chr16	38522782	38523569
Dam-ELK1_283	chr10	78057705	78058289
Dam-ELK1_284	chrX	7234058	7234529
Dam-ELK1_285	chr10	127547510	127548154
Dam-ELK1_286	chr3	90204639	90205317
Dam-ELK1_287	chr9	20448094	20448941
Dam-ELK1_288	chr19	4137309	4137654
Dam-ELK1_289	chr1	135028523	135029873
Dam-ELK1_290	chr6	140365240	140365612
Dam-ELK1_291	chr12	41174463	41175418
Dam-ELK1_292	chr11	105808005	105808648
Dam-ELK1_293	chr4	154385390	154386418
Dam-ELK1_294	chr1	36424740	36425035
Dam-ELK1_295	chr10	93002993	93003558
Dam-ELK1_296	chr11	115874379	115874863
Dam-ELK1_297	chr4	43596423	43596946
Dam-ELK1_298	chr8	13903159	13903435
Dam-ELK1_299	chr19	53604679	53605322
Dam-ELK1_300	chr11	48613247	48614289
Dam-ELK1_301	chr8	123155796	123157112
Dam-ELK1_302	chr15	98559038	98559676
Dam-ELK1_303	chr17	26701004	26701507
Dam-ELK1_304	chr4	151527016	151527583
Dam-ELK1_305	chr17	87152023	87152412
Dam-ELK1_306	chr11	77327140	77327979
Dam-ELK1_307	chr17	26649677	26650352
Dam-ELK1_308	chr4	123020531	123021411
Dam-ELK1_309	chr3	90319557	90320473
Dam-ELK1_310	chr6	136757258	136757622
Dam-ELK1_311	chr11	22742396	22743142
Dam-ELK1_312	chr11	113511584	113512175
Dam-ELK1_313	chr10	127929870	127930488
Dam-ELK1_314	chr13	12304038	12304639
Dam-ELK1_315	chr10	126760307	126761339
Dam-ELK1_316	chr19	11985923	11986740
Dam-ELK1_317	chr3	95975995	95976294
Dam-ELK1_318	chr15	31154499	31155303
Dam-ELK1_319	chr11	120042845	120043684
Dam-ELK1_320	chr2	34987561	34988060
Dam-ELK1_321	chr8	107787887	107788392
Dam-ELK1_322	chr6	116286496	116287153
Dam-ELK1_323	chr17	28218561	28219169
Dam-ELK1_324	chr17	5117410	5118078
Dam-ELK1_325	chr17	56397823	56398707
Dam-ELK1_326	chr17	46690628	46691943
Dam-ELK1_327	chr11	43564700	43565063
Dam-ELK1_328	chr13	55257135	55257605
Dam-ELK1_329	chr4	122562644	122563931
Dam-ELK1_330	chr19	46745288	46745913
Dam-ELK1_331	chr18	36447252	36447747
Dam-ELK1_332	chr7	134040959	134041387
Dam-ELK1_333	chr15	35866717	35867351
Dam-ELK1_334	chr11	68910946	68913312
Dam-ELK1_335	chr2	156050059	156050647
Dam-ELK1_336	chr9	45820061	45820454
Dam-ELK1_337	chr11	67733949	67734391
Dam-ELK1_338	chr11	70376999	70377877
Dam-ELK1_339	chr14	70998596	70999071
Dam-ELK1_340	chr18	34697785	34698409
Dam-ELK1_341	chr9	20781203	20781621
Dam-ELK1_342	chr12	77894189	77895311
Dam-ELK1_343	chr15	79498105	79498758
Dam-ELK1_344	chr7	4100525	4101129
Dam-ELK1_345	chr4	128867520	128868508
Dam-ELK1_346	chr19	53112097	53112666
Dam-ELK1_347	chr2	104430063	104430850
Dam-ELK1_348	chr5	92391466	92391859
Dam-ELK1_349	chr11	100512482	100513095
Dam-ELK1_350	chr5	125921214	125921471
Dam-ELK1_351	chr6	18799003	18799903
Dam-ELK1_352	chr1	178748334	178748981
Dam-ELK1_353	chr7	28713884	28714322
Dam-ELK1_354	chr1	120403471	120404264
Dam-ELK1_355	chr19	3324267	3325301
Dam-ELK1_356	chr3	137729361	137730939
Dam-ELK1_357	chr7	149646141	149647305
Dam-ELK1_358	chr11	19818403	19818666
Dam-ELK1_359	chr13	105017721	105018591
Dam-ELK1_360	chr6	87301057	87301930
Dam-ELK1_361	chr1	174306459	174306858
Dam-ELK1_362	chr2	25032470	25033177
Dam-ELK1_363	chr9	120060918	120061386
Dam-ELK1_364	chr9	108361935	108362559
Dam-ELK1_365	chr14	55723617	55724502
Dam-ELK1_366	chr6	113427704	113428977
Dam-ELK1_367	chr11	101303993	101304649
Dam-ELK1_368	chr2	174297762	174298164
Dam-ELK1_369	chr7	128177345	128177839
Dam-ELK1_370	chr16	14158745	14159122
Dam-ELK1_371	chr5	93033884	93034539
Dam-ELK1_372	chr4	108672474	108673077
Dam-ELK1_373	chr6	29413130	29414405
Dam-ELK1_374	chr17	36109167	36110143
Dam-ELK1_375	chr4	133688109	133688761
Dam-ELK1_376	chr8	127473712	127474174
Dam-ELK1_377	chr2	33070584	33071167
Dam-ELK1_378	chr2	156710361	156711158
Dam-ELK1_379	chr8	97429213	97430031
Dam-ELK1_380	chr11	118292338	118292957
Dam-ELK1_381	chr8	49079775	49080793
Dam-ELK1_382	chr19	4058891	4059726
Dam-ELK1_383	chr5	135662483	135663166
Dam-ELK1_384	chr12	3888155	3889526
Dam-ELK1_385	chr8	126187754	126188236
Dam-ELK1_386	chr19	3847387	3847717
Dam-ELK1_387	chr7	133414845	133415517
Dam-ELK1_388	chr8	23916246	23917973
Dam-ELK1_389	chr1	174425203	174425661
Dam-ELK1_390	chr6	94647658	94648786
Dam-ELK1_391	chr9	108470553	108470954
Dam-ELK1_392	chr10	61528869	61529333
Dam-ELK1_393	chr9	95413204	95414154
Dam-ELK1_394	chr8	87187375	87188260
Dam-ELK1_395	chr16	31080097	31080725
Dam-ELK1_396	chr6	29715499	29716219
Dam-ELK1_397	chr1	168338625	168339357
Dam-ELK1_398	chr1	74169654	74170187
Dam-ELK1_399	chr1	155595311	155596301
Dam-ELK1_400	chr19	5273805	5274393
Dam-ELK1_401	chr5	115750296	115750649
Dam-ELK1_402	chr19	43747399	43748501
Dam-ELK1_403	chr17	29993694	29994410
Dam-ELK1_404	chr12	92828878	92829383
Dam-ELK1_405	chr2	181113299	181114229
Dam-ELK1_406	chr15	103090430	103090891
Dam-ELK1_407	chr2	180188883	180189839
Dam-ELK1_408	chr12	113959366	113960278
Dam-ELK1_409	chr11	55273270	55274612
Dam-ELK1_410	chr12	85990567	85991116
Dam-ELK1_411	chr7	134715941	134716339
Dam-ELK1_412	chr4	116795740	116796159
Dam-ELK1_413	chr12	106246227	106246951
Dam-ELK1_414	chr19	5433855	5434379
Dam-ELK1_415	chr7	116868666	116870325
Dam-ELK1_416	chr10	126507310	126507826
Dam-ELK1_417	chr8	13757070	13757471
Dam-ELK1_418	chr3	122816942	122817694
Dam-ELK1_419	chr16	93629163	93629631
Dam-ELK1_420	chr16	91378150	91378483
Dam-ELK1_421	chr3	145539078	145539856
Dam-ELK1_422	chr2	150188249	150189155
Dam-ELK1_423	chr8	32222761	32223485
Dam-ELK1_424	chr11	100484197	100484668
Dam-ELK1_425	chr14	63741937	63743109
Dam-ELK1_426	chr5	35002523	35002969
Dam-ELK1_427	chr8	108673758	108674126
Dam-ELK1_428	chr6	50515650	50516131
Dam-ELK1_429	chr11	69394547	69395258
Dam-ELK1_430	chr2	121282413	121282809
Dam-ELK1_431	chr8	3676933	3677217
Dam-ELK1_432	chr11	60622238	60622563
Dam-ELK1_433	chr2	26757730	26758721
Dam-ELK1_434	chrX	71031660	71032620
Dam-ELK1_435	chr12	76411370	76411891
Dam-ELK1_436	chr2	167249378	167249673
Dam-ELK1_437	chr5	137592152	137592914
Dam-ELK1_438	chr1	169154755	169155213
Dam-ELK1_439	chr14	32150353	32150995
Dam-ELK1_440	chr11	102084306	102084526
Dam-ELK1_441	chr2	179776115	179776562
Dam-ELK1_442	chr1	36603245	36603727
Dam-ELK1_443	chr7	19895294	19895736
Dam-ELK1_444	chr1	108439826	108440938
Dam-ELK1_445	chr2	30141079	30141727
Dam-ELK1_446	chr15	101932223	101933032
Dam-ELK1_447	chr14	70206137	70206762
Dam-ELK1_448	chr12	114180733	114181263
Dam-ELK1_449	chr4	138434835	138435283
Dam-ELK1_450	chr4	129498409	129498802
Dam-ELK1_451	chr11	72861803	72863144
Dam-ELK1_452	chr19	55327845	55328465
Dam-ELK1_453	chr4	147241476	147242021
Dam-ELK1_454	chr11	77307824	77308225
Dam-ELK1_455	chr10	77887979	77888406
Dam-ELK1_456	chr18	12463292	12463824
Dam-ELK1_457	chr10	80630724	80631909
Dam-ELK1_458	chr8	73289430	73290297
Dam-ELK1_459	chr4	136158842	136159288
Dam-ELK1_460	chr11	32125455	32126007
Dam-ELK1_461	chr1	173433730	173434256
Dam-ELK1_462	chr9	107482668	107483228
Dam-ELK1_463	chr18	35899474	35900043
Dam-ELK1_464	chr2	31544678	31545362
Dam-ELK1_465	chr4	116797291	116798059
Dam-ELK1_466	chr13	55121938	55123488
Dam-ELK1_467	chr11	61308968	61309684
Dam-ELK1_468	chr1	94544159	94544911
Dam-ELK1_469	chr2	167328255	167328546
Dam-ELK1_470	chr9	20455795	20456694
Dam-ELK1_471	chr5	144670807	144671256
Dam-ELK1_472	chr19	7280888	7281319
Dam-ELK1_473	chr15	76180094	76181319
Dam-ELK1_474	chr19	34329087	34329486
Dam-ELK1_475	chr16	33382421	33382904
Dam-ELK1_476	chr14	55484683	55485059
Dam-ELK1_477	chr4	15886082	15886510
Dam-ELK1_478	chr17	26644010	26644409
Dam-ELK1_479	chr11	117684039	117684506
Dam-ELK1_480	chr8	124352478	124353109
Dam-ELK1_481	chr16	46010881	46011366
Dam-ELK1_482	chr16	30066151	30066726
Dam-ELK1_483	chr14	55261956	55262660
Dam-ELK1_484	chr12	106795395	106796074
Dam-ELK1_485	chr5	140895938	140896486
Dam-ELK1_486	chr2	150573895	150574623
Dam-ELK1_487	chr14	55633434	55634466
Dam-ELK1_488	chr11	117001496	117002016
Dam-ELK1_489	chr5	125956406	125957153
Dam-ELK1_490	chr12	4236114	4237018
Dam-ELK1_491	chr7	134613691	134614500
Dam-ELK1_492	chr3	108059275	108060294
Dam-ELK1_493	chr11	59283580	59283955
Dam-ELK1_494	chr4	41081628	41082190
Dam-ELK1_495	chr15	78706677	78707232
Dam-ELK1_496	chr4	133812702	133813147
Dam-ELK1_497	chr3	145315450	145316184
Dam-ELK1_498	chr2	179991046	179991305
Dam-ELK1_499	chr1	58087178	58087639
Dam-ELK1_500	chr11	70500446	70500807
Dam-ELK1_501	chr8	73197454	73197865
Dam-ELK1_502	chr6	124989424	124989797
Dam-ELK1_503	chr2	167458555	167459803
Dam-ELK1_504	chr1	38053872	38054632
Dam-ELK1_505	chr9	20765789	20766283
Dam-ELK1_506	chr1	93300815	93301360
Dam-ELK1_507	chr5	76953675	76953935
Dam-ELK1_508	chr11	72950259	72950946
Dam-ELK1_509	chr11	4748409	4748951
Dam-ELK1_510	chr8	4779153	4779682
Dam-ELK1_511	chr3	108457614	108458212
Dam-ELK1_512	chr11	70466239	70466672
Dam-ELK1_513	chr14	47441100	47441354
Dam-ELK1_514	chr8	13198506	13199888
Dam-ELK1_515	chr10	86118709	86119326
Dam-ELK1_516	chr11	29072323	29072793
Dam-ELK1_517	chr13	34490008	34490440
Dam-ELK1_518	chr14	47504141	47504568
Dam-ELK1_519	chr3	87834745	87835342
Dam-ELK1_520	chr9	20897109	20897397
Dam-ELK1_521	chr1	135805513	135806239
Dam-ELK1_522	chr1	52176614	52177065
Dam-ELK1_523	chr1	88201075	88201655
Dam-ELK1_524	chr9	106152193	106152618
Dam-ELK1_525	chr15	74550657	74551221
Dam-ELK1_526	chr8	109619160	109619932
Dam-ELK1_527	chr11	98218749	98219382
Dam-ELK1_528	chr4	143002445	143003076
Dam-ELK1_529	chr2	93304349	93304758
Dam-ELK1_530	chr16	13668592	13669299
Dam-ELK1_531	chr8	72825935	72826852
Dam-ELK1_532	chrX	34184290	34184652
Dam-ELK1_533	chr12	111723155	111724631
Dam-ELK1_534	chr7	88356884	88357494
Dam-ELK1_535	chr7	63098076	63098330
Dam-ELK1_536	chrX	68618780	68619636
Dam-ELK1_537	chr9	56978035	56978527
Dam-ELK1_538	chr5	34525456	34526100
Dam-ELK1_539	chr2	144284236	144284874
Dam-ELK1_540	chr10	82415747	82416045
Dam-ELK1_541	chr4	128642619	128643225
Dam-ELK1_542	chr6	91757672	91758129
Dam-ELK1_543	chr3	87970296	87970706
Dam-ELK1_544	chr11	29448060	29448657
Dam-ELK1_545	chr12	83358855	83359534
Dam-ELK1_546	chr11	101969731	101970740
Dam-ELK1_547	chr2	30213412	30213987
Dam-ELK1_548	chr7	28515843	28516126
Dam-ELK1_549	chr17	11034023	11035173
Dam-ELK1_550	chr11	118221908	118222318
Dam-ELK1_551	chr11	60744382	60745062
Dam-ELK1_552	chr5	137520897	137521613
Dam-ELK1_553	chr11	62271682	62272459
Dam-ELK1_554	chr7	31423938	31424516
Dam-ELK1_555	chr14	56195688	56196845
Dam-ELK1_556	chr19	7069446	7070202
Dam-ELK1_557	chr11	55283773	55284508
Dam-ELK1_558	chr2	26883658	26884116
Dam-ELK1_559	chr9	44157014	44157579
Dam-ELK1_560	chr4	118109210	118109707
Dam-ELK1_561	chr9	35019115	35019877
Dam-ELK1_562	chr4	132687304	132688520
Dam-ELK1_563	chr17	56748710	56749590
Dam-ELK1_564	chr3	127491985	127492476
Dam-ELK1_565	chr9	21960521	21961139
Dam-ELK1_566	chr5	122730401	122731678
Dam-ELK1_567	chr1	163181565	163181890
Dam-ELK1_568	chr1	192735736	192736542
Dam-ELK1_569	chr18	34784151	34784606
Dam-ELK1_570	chr11	69209798	69210426
Dam-ELK1_571	chr8	27130363	27131080
Dam-ELK1_572	chr7	87377927	87378281
Dam-ELK1_573	chr11	53914981	53915463
Dam-ELK1_574	chr17	34261697	34261955
Dam-ELK1_575	chr11	78515675	78516136
Dam-ELK1_576	chr18	24147767	24148138
Dam-ELK1_577	chr4	118293495	118294076
Dam-ELK1_578	chr8	42502177	42502669
Dam-ELK1_579	chr4	133561484	133562378
Dam-ELK1_580	chr8	113370005	113370681
Dam-ELK1_581	chr17	25151425	25152282
Dam-ELK1_582	chr4	128405825	128406489
Dam-ELK1_583	chr10	80261000	80261364
Dam-ELK1_584	chr1	63162521	63162974
Dam-ELK1_585	chr14	12384000	12384729
Dam-ELK1_586	chr12	99971282	99971734
Dam-ELK1_587	chr1	136257412	136257703
Dam-ELK1_588	chr9	44285553	44286616
Dam-ELK1_589	chr5	34531436	34532213
Dam-ELK1_590	chr11	83613078	83613605
Dam-ELK1_591	chr4	132817100	132817387
Dam-ELK1_592	chr13	49402359	49402721
Dam-ELK1_593	chr5	37254161	37254726
Dam-ELK1_594	chr3	37318854	37319154
Dam-ELK1_595	chr17	27758873	27759440
Dam-ELK1_596	chr4	122638843	122639434
Dam-ELK1_597	chr5	74927828	74928117
Dam-ELK1_598	chr15	78362182	78362837
Dam-ELK1_599	chr11	40505351	40505637
Dam-ELK1_600	chr8	120197125	120197636
Dam-ELK1_601	chr9	54228234	54228753
Dam-ELK1_602	chr2	26763291	26763836
Dam-ELK1_603	chr10	76192467	76192797
Dam-ELK1_604	chr1	92847089	92847421
Dam-ELK1_605	chr4	155269664	155270050
Dam-ELK1_606	chr7	87414810	87415464
Dam-ELK1_607	chr5	123845251	123845642
Dam-ELK1_608	chr3	40888715	40889553
Dam-ELK1_609	chr7	134041954	134042485
Dam-ELK1_610	chr7	80886083	80886935
Dam-ELK1_611	chr2	151931819	151932652
Dam-ELK1_612	chr9	44075204	44075886
Dam-ELK1_613	chr4	120338772	120339178
Dam-ELK1_614	chr18	38456853	38457460
Dam-ELK1_615	chr11	117718044	117718408
Dam-ELK1_616	chr18	75977212	75977701
Dam-ELK1_617	chr11	68886366	68886784
Dam-ELK1_618	chr7	148195339	148195885
Dam-ELK1_619	chr11	80620730	80621206
Dam-ELK1_620	chr4	140544428	140544819
Dam-ELK1_621	chr15	73574899	73576257
Dam-ELK1_622	chr17	24584789	24586288
Dam-ELK1_623	chr2	26789866	26790188
Dam-ELK1_624	chr9	65425777	65426632
Dam-ELK1_625	chr11	69808491	69809078
Dam-ELK1_626	chr2	156520808	156521437
Dam-ELK1_627	chr8	107779140	107779905
Dam-ELK1_628	chr12	114379300	114379733
Dam-ELK1_629	chr1	167236851	167237302
Dam-ELK1_630	chr5	137730511	137730968
Dam-ELK1_631	chr15	81976550	81977241
Dam-ELK1_632	chr5	143668220	143668855
Dam-ELK1_633	chr7	27980689	27981405
Dam-ELK1_634	chr4	115458468	115458748
Dam-ELK1_635	chr11	88717974	88718567
Dam-ELK1_636	chr12	8680050	8680663
Dam-ELK1_637	chr10	66745742	66747168
Dam-ELK1_638	chr5	34000475	34002161
Dam-ELK1_639	chr4	141637371	141638051
Dam-ELK1_640	chr15	78905858	78906178
Dam-ELK1_641	chr9	59138587	59139269
Dam-ELK1_642	chr17	72130416	72131515
Dam-ELK1_643	chr16	91373816	91374539
Dam-ELK1_644	chr5	139846285	139847201
Dam-ELK1_645	chr11	94869103	94870003
Dam-ELK1_646	chr5	53658509	53658916
Dam-ELK1_647	chr11	97702244	97703519
Dam-ELK1_648	chr6	112675025	112675706
Dam-ELK1_649	chr19	43596669	43597400
Dam-ELK1_650	chr15	84866152	84866741
Dam-ELK1_651	chr2	57089007	57089925
Dam-ELK1_652	chr1	193816397	193816914
Dam-ELK1_653	chr5	145724506	145725068
Dam-ELK1_654	chr6	127024521	127024980
Dam-ELK1_655	chr3	95698436	95698725
Dam-ELK1_656	chr11	79775792	79776367
Dam-ELK1_657	chr17	27195505	27196141
Dam-ELK1_658	chr8	119680221	119680513
Dam-ELK1_659	chr18	62112949	62113462
Dam-ELK1_660	chr2	151902222	151903333
Dam-ELK1_661	chr19	38128504	38129038
Dam-ELK1_662	chr8	114464053	114464582
Dam-ELK1_663	chr14	32029075	32029370
Dam-ELK1_664	chr11	95122080	95122705
Dam-ELK1_665	chr15	98464524	98464917
Dam-ELK1_666	chr17	15701076	15701931
Dam-ELK1_667	chr7	28623466	28624248
Dam-ELK1_668	chr1	177420437	177420769
Dam-ELK1_669	chr2	122454505	122455035
Dam-ELK1_670	chr4	32050188	32050717
Dam-ELK1_671	chr2	104657573	104657830
Dam-ELK1_672	chr3	93353799	93354329
Dam-ELK1_673	chr7	87514554	87515659
Dam-ELK1_674	chr11	83242426	83242735
Dam-ELK1_675	chr8	87299974	87300422
Dam-ELK1_676	chr5	35378373	35378880
Dam-ELK1_677	chr12	45370621	45371594
Dam-ELK1_678	chr8	35187378	35187878
Dam-ELK1_679	chr12	85626366	85627340
Dam-ELK1_680	chr2	37636096	37636837
Dam-ELK1_681	chr11	76218897	76219449
Dam-ELK1_682	chr2	156373634	156374036
Dam-ELK1_683	chr4	134470378	134470733
Dam-ELK1_684	chr9	56924962	56925240
Dam-ELK1_685	chr7	133919721	133920132
Dam-ELK1_686	chr13	59770026	59770665
Dam-ELK1_687	chr17	34087108	34088130
Dam-ELK1_688	chr11	60540948	60541734
Dam-ELK1_689	chr15	32343922	32345083
Dam-ELK1_690	chr6	40274605	40274998
Dam-ELK1_691	chr11	68792963	68793237
Dam-ELK1_692	chr8	122301459	122301975
Dam-ELK1_693	chr17	35001364	35001729
Dam-ELK1_694	chr9	122932217	122932672
Dam-ELK1_695	chr10	81090131	81090430
Dam-ELK1_696	chr17	23723196	23723639
Dam-ELK1_697	chr15	78709572	78710079
Dam-ELK1_698	chr1	120208652	120209067
Dam-ELK1_699	chr10	77472734	77473461
Dam-ELK1_700	chr15	72977900	72978893
Dam-ELK1_701	chr1	74839446	74839995
Dam-ELK1_702	chr14	32084995	32085385
Dam-ELK1_703	chr6	116148957	116149943
Dam-ELK1_704	chr7	133411191	133411890
Dam-ELK1_705	chr7	75293383	75294055
Dam-ELK1_706	chr2	180654895	180655115
Dam-ELK1_707	chr18	12327612	12327969
Dam-ELK1_708	chr15	91503993	91504617
Dam-ELK1_709	chr2	158231917	158232233
Dam-ELK1_710	chr13	92016487	92016873
Dam-ELK1_711	chr10	80132245	80132827
Dam-ELK1_712	chr7	28798108	28798422
Dam-ELK1_713	chr1	140859676	140860005
Dam-ELK1_714	chr10	127530824	127531444
Dam-ELK1_715	chr4	142752575	142753083
Dam-ELK1_716	chr2	26764378	26764818
Dam-ELK1_717	chr3	79645311	79645857
Dam-ELK1_718	chr4	129437850	129438105
Dam-ELK1_719	chr5	36096511	36097207
Dam-ELK1_720	chr1	155038384	155038997
Dam-ELK1_721	chr13	46597939	46598914
Dam-ELK1_722	chr17	45872092	45872508
Dam-ELK1_723	chr19	43598024	43599050
Dam-ELK1_724	chr5	77544112	77544693
Dam-ELK1_725	chr4	9596590	9597548
Dam-ELK1_726	chr7	148281579	148282007
Dam-ELK1_727	chr15	78003436	78003714
Dam-ELK1_728	chr1	82722134	82722585
Dam-ELK1_729	chr5	113510775	113511021
Dam-ELK1_730	chr1	92865304	92865897
Dam-ELK1_731	chr6	29384186	29384825
Dam-ELK1_732	chr12	109939605	109939963
Dam-ELK1_733	chr3	107565016	107565723
Dam-ELK1_734	chrX	131284124	131284365
Dam-ELK1_735	chr1	33725664	33726146
Dam-ELK1_736	chr15	97646029	97646422
Dam-ELK1_737	chr6	81875659	81876124
Dam-ELK1_738	chr9	42754265	42754752
Dam-ELK1_739	chr11	98245061	98245595
Dam-ELK1_740	chr19	10270937	10271383
Dam-ELK1_741	chr15	89040301	89041188
Dam-ELK1_742	chr12	21292615	21293326
Dam-ELK1_743	chr4	106403209	106403567
Dam-ELK1_744	chr7	147307914	147308517
Dam-ELK1_745	chr14	34966769	34967411
Dam-ELK1_746	chr4	138419693	138420390
Dam-ELK1_747	chr1	171857189	171857514
Dam-ELK1_748	chr17	8504567	8505053
Dam-ELK1_749	chr11	102747558	102748117
Dam-ELK1_750	chr5	145965588	145966277
Dam-ELK1_751	chr19	8971843	8973070
Dam-ELK1_752	chr4	116799616	116799979
Dam-ELK1_753	chr7	147236185	147236739
Dam-ELK1_754	chr10	43867488	43868027
Dam-ELK1_755	chr12	35732930	35733394
Dam-ELK1_756	chr5	64547284	64547692
Dam-ELK1_757	chr4	149111153	149111436
Dam-ELK1_758	chr4	57578414	57579416
Dam-ELK1_759	chr3	95085784	95086504
Dam-ELK1_760	chr2	77655745	77656089
Dam-ELK1_761	chr7	54262782	54263677
Dam-ELK1_762	chr19	16859549	16860152
Dam-ELK1_763	chr7	31900730	31901086
Dam-ELK1_764	chr7	134731425	134732042
Dam-ELK1_765	chr1	121405635	121406666
Dam-ELK1_766	chr8	106771107	106771880
Dam-ELK1_767	chr17	35154499	35155131
Dam-ELK1_768	chr9	44221236	44221579
Dam-ELK1_769	chr9	69136797	69137156
Dam-ELK1_770	chr17	33083864	33084663
Dam-ELK1_771	chr11	115969602	115970336
Dam-ELK1_772	chr14	56222244	56222845
Dam-ELK1_773	chr15	68758069	68758706
Dam-ELK1_774	chr4	129286434	129287303
Dam-ELK1_775	chr9	107980565	107981350
Dam-ELK1_776	chr14	63752217	63752600
Dam-ELK1_777	chr3	88035409	88035779
Dam-ELK1_778	chr3	95986384	95986772
Dam-ELK1_779	chr2	154717812	154718168
Dam-ELK1_780	chr10	61710400	61710833
Dam-ELK1_781	chr12	80397698	80398832
Dam-ELK1_782	chr7	19814395	19815094
Dam-ELK1_783	chr4	138529376	138529769
Dam-ELK1_784	chr7	129225468	129226011
Dam-ELK1_785	chr17	17762102	17762822
Dam-ELK1_786	chr11	77992763	77993482
Dam-ELK1_787	chr7	54186162	54186448
Dam-ELK1_788	chr9	21601532	21602195
Dam-ELK1_789	chr17	34080078	34080721
Dam-ELK1_790	chr4	32048415	32049140
Dam-ELK1_791	chr1	195026413	195027820
Dam-ELK1_792	chr2	160558273	160559611
Dam-ELK1_793	chr6	51961749	51962137
Dam-ELK1_794	chr11	115761753	115762234
Dam-ELK1_795	chr7	106417077	106417403
Dam-ELK1_796	chr1	154470318	154471301
Dam-ELK1_797	chr15	98860761	98861455
Dam-ELK1_798	chr12	3235128	3235517
Dam-ELK1_799	chr7	109414716	109415500
Dam-ELK1_800	chr4	14790667	14790997
Dam-ELK1_801	chr11	96651674	96652365
Dam-ELK1_802	chr7	148642391	148642856
Dam-ELK1_803	chr13	97203468	97203811
Dam-ELK1_804	chr16	10483976	10484747
Dam-ELK1_805	chr7	133934190	133934687
Dam-ELK1_806	chr7	54100559	54100953
Dam-ELK1_807	chr4	140368002	140368362
Dam-ELK1_808	chr19	6085203	6085481
Dam-ELK1_809	chr15	68756269	68756688
Dam-ELK1_810	chr5	65590680	65591085
Dam-ELK1_811	chr17	46585566	46585890
Dam-ELK1_812	chr3	96001434	96002378
Dam-ELK1_813	chr15	78870463	78870925
Dam-ELK1_814	chr4	43571002	43571620
Dam-ELK1_815	chr5	108740924	108741609
Dam-ELK1_816	chr2	118605600	118605933
Dam-ELK1_817	chr11	72957100	72957748
Dam-ELK1_818	chr17	79280423	79281117
Dam-ELK1_819	chr8	97399302	97399954
Dam-ELK1_820	chr18	61007921	61008358
Dam-ELK1_821	chr19	5488213	5489934
Dam-ELK1_822	chr4	3605132	3605568
Dam-ELK1_823	chr2	91564954	91565430
Dam-ELK1_824	chr15	84687778	84688060
Dam-ELK1_825	chr1	74820432	74820766
Dam-ELK1_826	chr7	151797094	151797719
Dam-ELK1_827	chr3	123147343	123147725
Dam-ELK1_828	chr2	51002589	51002951
Dam-ELK1_829	chr5	139474484	139474869
Dam-ELK1_830	chr12	9037237	9037677
Dam-ELK1_831	chr2	84489953	84490597
Dam-ELK1_832	chr17	56322499	56323240
Dam-ELK1_833	chr4	134705515	134705838
Dam-ELK1_834	chr8	97604674	97605410
Dam-ELK1_835	chr11	5689043	5689968
Dam-ELK1_836	chr11	4346010	4346377
Dam-ELK1_837	chr2	155340789	155341163
Dam-ELK1_838	chr11	68885602	68885970
Dam-ELK1_839	chr4	41675817	41676140
Dam-ELK1_840	chr8	23510107	23510426
Dam-ELK1_841	chr2	151967105	151967651
Dam-ELK1_842	chr3	153631468	153632413
Dam-ELK1_843	chr10	128359981	128360895
Dam-ELK1_844	chr13	99462331	99462800
Dam-ELK1_845	chr2	153985459	153985709
Dam-ELK1_846	chr15	99484351	99485248
Dam-ELK1_847	chr4	94721373	94721805
Dam-ELK1_848	chr6	82714607	82714893
Dam-ELK1_849	chr11	59778116	59779370
Dam-ELK1_850	chr18	37965415	37965739
Dam-ELK1_851	chr8	75070753	75071189
Dam-ELK1_852	chr11	96686552	96686939
Dam-ELK1_853	chr5	117583813	117584533
Dam-ELK1_854	chr4	114733373	114733874
Dam-ELK1_855	chr11	69484083	69484558
Dam-ELK1_856	chr1	90968121	90968438
Dam-ELK1_857	chr6	124323732	124324198
Dam-ELK1_858	chr15	73450643	73451546
Dam-ELK1_859	chr11	72973544	72973826
Dam-ELK1_860	chr14	70556737	70557070
Dam-ELK1_861	chr5	101252407	101252846
Dam-ELK1_862	chr12	88783090	88783566
Dam-ELK1_863	chr17	25376017	25376769
Dam-ELK1_864	chr6	145880697	145880986
Dam-ELK1_865	chr12	17005724	17007032
Dam-ELK1_866	chr4	45120245	45120508
Dam-ELK1_867	chr1	156992793	156993067
Dam-ELK1_868	chr8	72663381	72664030
Dam-ELK1_869	chr3	104666231	104667326
Dam-ELK1_870	chr17	25966115	25966718
Dam-ELK1_871	chr4	117503452	117504512
Dam-ELK1_872	chr4	131858238	131858564
Dam-ELK1_873	chr14	57194556	57195031
Dam-ELK1_874	chr11	72827425	72827831
Dam-ELK1_875	chr1	82313561	82313827
Dam-ELK1_876	chr7	89077789	89078300
Dam-ELK1_877	chr14	32899070	32899767
Dam-ELK1_878	chr17	24873013	24873479
Dam-ELK1_879	chr15	76709892	76710380
Dam-ELK1_880	chr5	125872967	125873508
Dam-ELK1_881	chr19	6061811	6062460
Dam-ELK1_882	chr17	24388503	24389341
Dam-ELK1_883	chr6	125081750	125082104
Dam-ELK1_884	chr10	76821415	76822526
Dam-ELK1_885	chr19	42854415	42854805
Dam-ELK1_886	chr1	135980042	135980989
Dam-ELK1_887	chr11	104468270	104468776
Dam-ELK1_888	chr10	80707564	80708099
Dam-ELK1_889	chr17	30023862	30024332
Dam-ELK1_890	chr4	57314224	57314850
Dam-ELK1_891	chr2	172800822	172801197
Dam-ELK1_892	chr8	74116652	74117660
Dam-ELK1_893	chr17	45910344	45911197
Dam-ELK1_894	chr4	128802758	128803777
Dam-ELK1_895	chr4	41708190	41708445
Dam-ELK1_896	chrX	39504368	39504745
Dam-ELK1_897	chr3	9003696	9004041
Dam-ELK1_898	chr2	26762451	26762801
Dam-ELK1_899	chr4	131632039	131632493
Dam-ELK1_900	chr11	117472686	117473061
Dam-ELK1_901	chr5	140890351	140890624
Dam-ELK1_902	chr17	49567447	49568501
Dam-ELK1_903	chr2	148599943	148600704
Dam-ELK1_904	chr11	77929517	77929973
Dam-ELK1_905	chr1	136129537	136131027
Dam-ELK1_906	chr13	113844595	113844984
Dam-ELK1_907	chr10	128397475	128397915
Dam-ELK1_908	chr1	158603770	158604091
Dam-ELK1_909	chr17	23885052	23885473
Dam-ELK1_910	chr1	137625948	137626419
Dam-ELK1_911	chr6	42643352	42644001
Dam-ELK1_912	chr11	76212948	76213734
Dam-ELK1_913	chr6	145158580	145158980
Dam-ELK1_914	chr8	15018577	15019355
Dam-ELK1_915	chr6	72555238	72555701
Dam-ELK1_916	chr7	133630538	133630888
Dam-ELK1_917	chr9	54555376	54555726
Dam-ELK1_918	chr4	116381783	116382105
Dam-ELK1_919	chr3	88299514	88300024
Dam-ELK1_920	chr11	60172093	60172353
Dam-ELK1_921	chr11	68859319	68859803
Dam-ELK1_922	chr7	106295250	106295492
Dam-ELK1_923	chr11	59780083	59780332
Dam-ELK1_924	chr11	78135561	78135937
Dam-ELK1_925	chr7	135380856	135381158
Dam-ELK1_926	chr8	113243730	113244376
Dam-ELK1_927	chr12	16656533	16657019
Dam-ELK1_928	chr19	47993981	47994406
Dam-ELK1_929	chr2	165112099	165112488
Dam-ELK1_930	chr2	51005326	51005722
Dam-ELK1_931	chr9	108485365	108485908
Dam-ELK1_932	chr2	17959108	17959364
Dam-ELK1_933	chr1	137616349	137616632
Dam-ELK1_934	chr18	60763460	60764500
Dam-ELK1_935	chr4	128406737	128407229
Dam-ELK1_936	chr12	87423259	87424193
Dam-ELK1_937	chr2	109858244	109858500
Dam-ELK1_938	chr17	35214756	35215129
Dam-ELK1_939	chr6	120481948	120482298
Dam-ELK1_940	chr7	31344532	31345177
Dam-ELK1_941	chr2	69363243	69363560
Dam-ELK1_942	chr7	52272093	52272785
Dam-ELK1_943	chr1	154751655	154752193
Dam-ELK1_944	chr10	127847068	127847842
Dam-ELK1_945	chr2	173486197	173487006
Dam-ELK1_946	chr11	120629302	120629544
Dam-ELK1_947	chr11	78325108	78325500
Dam-ELK1_948	chr16	4881190	4881641
Dam-ELK1_949	chr19	4144165	4144778
Dam-ELK1_950	chr19	3912751	3913180
Dam-ELK1_951	chr16	17508787	17509358
Dam-ELK1_952	chr15	100562870	100563227
Dam-ELK1_953	chr13	73605739	73606125
Dam-ELK1_954	chr19	42688649	42688981
Dam-ELK1_955	chr1	174241049	174241952
Dam-ELK1_956	chr5	64552809	64553370
Dam-ELK1_957	chr11	69364657	69365085
Dam-ELK1_958	chr4	41261864	41262320
Dam-ELK1_959	chr2	62484258	62484602
Dam-ELK1_960	chr6	13820979	13821381
Dam-ELK1_961	chr14	51543256	51543841
Dam-ELK1_962	chr8	34765083	34765776
Dam-ELK1_963	chr4	132797994	132798491
Dam-ELK1_964	chr7	17367784	17368955
Dam-ELK1_965	chr15	101835075	101836122
Dam-ELK1_966	chr6	83074425	83074786
Dam-ELK1_967	chr5	31252523	31253030
Dam-ELK1_968	chr16	16984041	16984547
Dam-ELK1_969	chr17	47432441	47433027
Dam-ELK1_970	chr15	98463689	98464008
Dam-ELK1_971	chr8	3708577	3709054
Dam-ELK1_972	chr4	56962145	56962653
Dam-ELK1_973	chr5	120958839	120959207
Dam-ELK1_974	chr11	59954685	59954981
Dam-ELK1_975	chr8	107850118	107850513
Dam-ELK1_976	chr13	55470635	55470919
Dam-ELK1_977	chr8	109589010	109589300
Dam-ELK1_978	chr7	148450338	148451207
Dam-ELK1_979	chr4	132795734	132796642
Dam-ELK1_980	chr11	94929942	94930288
Dam-ELK1_981	chr2	4933902	4934241
Dam-ELK1_982	chr1	75217992	75218399
Dam-ELK1_983	chr6	5205815	5206175
Dam-ELK1_984	chr1	84836208	84836514
Dam-ELK1_985	chr6	115802845	115803161
Dam-ELK1_986	chr8	47574167	47574496
Dam-ELK1_987	chr2	121267333	121267736
Dam-ELK1_988	chr11	115351862	115352527
Dam-ELK1_989	chr7	137866667	137867255
Dam-ELK1_990	chr2	59451194	59451520
Dam-ELK1_991	chr8	8689479	8689767
Dam-ELK1_992	chr6	124760562	124760855
Dam-ELK1_993	chr18	34489839	34490187
Dam-ELK1_994	chr13	93380222	93380580
Dam-ELK1_995	chr2	114479911	114480418
Dam-ELK1_996	chr4	41064336	41064602
Dam-ELK1_997	chr11	68770106	68770371
Dam-ELK1_998	chr13	58259399	58259959
Dam-ELK1_999	chr14	21555216	21555474
Dam-ELK1_1000	chr9	21230029	21230502
Dam-ELK1_1001	chr15	57966763	57967138
Dam-ELK1_1002	chr6	72566947	72567579
Dam-ELK1_1003	chr9	45746851	45747283
Dam-ELK1_1004	chr15	81893393	81893827
Dam-ELK1_1005	chr7	74517765	74518015
Dam-ELK1_1006	chr18	80431577	80432056
Dam-ELK1_1007	chr12	106801953	106802461
Dam-ELK1_1008	chr8	128189943	128190318
Dam-ELK1_1009	chr18	7629116	7629631
Dam-ELK1_1010	chr17	56213301	56213596
Dam-ELK1_1011	chr9	77759204	77759727
Dam-ELK1_1012	chr5	117803957	117804258
Dam-ELK1_1013	chr12	112399822	112400105
Dam-ELK1_1014	chr18	32299102	32299479
Dam-ELK1_1015	chr12	86218137	86218822
Dam-ELK1_1016	chr5	24346977	24347604
Dam-ELK1_1017	chr9	22030397	22030931
Dam-ELK1_1018	chr5	145017654	145018131
Dam-ELK1_1019	chr4	155177485	155177808
Dam-ELK1_1020	chr8	97269100	97269383
Dam-ELK1_1021	chr10	68991790	68992448
Dam-ELK1_1022	chr1	184449908	184450446
Dam-ELK1_1023	chr6	100620172	100620995
Dam-ELK1_1024	chr7	133840102	133840568
Dam-ELK1_1025	chr18	61666604	61666889
Dam-ELK1_1026	chr5	31496289	31496659
Dam-ELK1_1027	chr6	83389221	83390030
Dam-ELK1_1028	chr18	74223350	74223635
Dam-ELK1_1029	chr6	141199157	141199686
Dam-ELK1_1030	chr4	155040600	155041295
Dam-ELK1_1031	chr8	74151903	74152452
Dam-ELK1_1032	chr9	44215567	44215747
Dam-ELK1_1033	chr18	43554257	43554613
Dam-ELK1_1034	chr4	119963240	119964227
Dam-ELK1_1035	chr1	55294492	55295048
Dam-ELK1_1036	chr9	108758388	108758820
Dam-ELK1_1037	chr2	24830196	24830638
Dam-ELK1_1038	chr19	55917941	55918377
Dam-ELK1_1039	chr5	136256250	136256505
Dam-ELK1_1040	chr9	56922267	56922983
Dam-ELK1_1041	chr8	127092933	127093477
Dam-ELK1_1042	chr1	195127526	195127808
Dam-ELK1_1043	chr17	79134028	79135193
Dam-ELK1_1044	chr8	87607198	87607852
Dam-ELK1_1045	chr10	87610061	87610707
Dam-ELK1_1046	chr6	52664407	52664680
Dam-ELK1_1047	chr5	138558043	138558588
Dam-ELK1_1048	chr1	182572147	182572431
Dam-ELK1_1049	chr2	163050198	163050920
Dam-ELK1_1050	chr7	117129224	117130337
Dam-ELK1_1051	chr11	76324460	76324819
Dam-ELK1_1052	chr11	117860530	117860881
Dam-ELK1_1053	chr5	143988308	143988671
Dam-ELK1_1054	chr7	35030510	35030807
Dam-ELK1_1055	chr19	5925543	5926000
Dam-ELK1_1056	chr16	35869750	35870350
Dam-ELK1_1057	chr17	79284369	79284665
Dam-ELK1_1058	chr3	7433073	7433480
Dam-ELK1_1059	chr2	14527161	14527515
Dam-ELK1_1060	chr1	194955277	194955722
Dam-ELK1_1061	chr3	107948985	107949267
Dam-ELK1_1062	chr16	4887973	4888478
Dam-ELK1_1063	chr11	74711968	74712215
Dam-ELK1_1064	chr8	46418504	46418996
Dam-ELK1_1065	chr11	97860952	97861456
Dam-ELK1_1066	chrX	132779563	132779949
Dam-ELK1_1067	chr1	84830473	84831013
Dam-ELK1_1068	chr12	112276188	112276482
Dam-ELK1_1069	chr13	14131741	14132125
Dam-ELK1_1070	chr2	167485935	167486344
Dam-ELK1_1071	chr3	95325025	95325401
Dam-ELK1_1072	chr3	54916937	54917233
Dam-ELK1_1073	chr2	180923606	180923967
Dam-ELK1_1074	chr15	85037171	85037927
Dam-ELK1_1075	chr17	24552015	24552444
Dam-ELK1_1076	chr19	4792799	4793490
Dam-ELK1_1077	chr6	42215420	42216205
Dam-ELK1_1078	chr2	167487651	167488190
Dam-ELK1_1079	chr1	127330955	127331485
Dam-ELK1_1080	chr7	52003458	52003933
Dam-ELK1_1081	chr19	42826288	42827236
Dam-ELK1_1082	chr15	80610780	80611113
Dam-ELK1_1083	chrX	10294943	10295605
Dam-ELK1_1084	chr16	35869049	35869459
Dam-ELK1_1085	chr8	3515756	3516198
Dam-ELK1_1086	chr9	43052292	43053009
Dam-ELK1_1087	chr2	126895618	126896013
Dam-ELK1_1088	chr2	165113377	165113692
Dam-ELK1_1089	chr10	5955863	5956318
Dam-ELK1_1090	chr9	106379769	106380100
Dam-ELK1_1091	chr6	113328819	113329445
Dam-ELK1_1092	chr15	89006532	89007162
Dam-ELK1_1093	chr6	124719769	124720127
Dam-ELK1_1094	chr7	56138293	56140007
Dam-ELK1_1095	chr15	98886400	98886758
Dam-ELK1_1096	chr9	53343927	53344658
Dam-ELK1_1097	chr7	36233576	36233951
Dam-ELK1_1098	chr9	110207841	110208097
Dam-ELK1_1099	chr1	167127956	167128369
Dam-ELK1_1100	chr8	119468987	119469761
Dam-ELK1_1101	chr10	18127137	18127712
Dam-ELK1_1102	chr15	99362299	99362666
Dam-ELK1_1103	chr17	85190433	85190812
Dam-ELK1_1104	chr7	148746932	148747817
Dam-ELK1_1105	chr4	147312098	147312490
Dam-ELK1_1106	chr2	130099681	130100300
Dam-ELK1_1107	chr3	100293361	100293837
Dam-ELK1_1108	chr10	92625099	92625604
Dam-ELK1_1109	chr8	11309839	11310289
Dam-ELK1_1110	chr4	151528325	151528891
Dam-ELK1_1111	chr17	56789959	56790352
Dam-ELK1_1112	chr8	59805878	59806867
Dam-ELK1_1113	chr2	179849364	179850398
Dam-ELK1_1114	chr10	17441443	17441738
Dam-ELK1_1115	chr16	91889001	91889423
Dam-ELK1_1116	chr2	130249968	130250292
Dam-ELK1_1117	chr14	120721085	120722168
Dam-ELK1_1118	chr11	5855994	5856250
Dam-ELK1_1119	chr19	6014723	6015043
Dam-ELK1_1120	chr8	80247135	80247578
Dam-ELK1_1121	chr6	83058639	83059495
Dam-ELK1_1122	chr8	28133291	28133814
Dam-ELK1_1123	chr3	94777933	94778371
Dam-ELK1_1124	chr5	149210219	149210526
Dam-ELK1_1125	chr16	35538334	35538733
Dam-ELK1_1126	chr2	91868137	91869402
Dam-ELK1_1127	chr5	24607257	24607692
Dam-ELK1_1128	chr14	65993954	65995022
Dam-ELK1_1129	chr9	119232295	119232592
Dam-ELK1_1130	chr8	108490731	108491120
Dam-ELK1_1131	chr9	107579445	107579843
Dam-ELK1_1132	chr12	104650296	104650656
Dam-ELK1_1133	chr10	17440387	17440977
Dam-ELK1_1134	chr4	141179909	141180373
Dam-ELK1_1135	chr2	90686427	90686673
Dam-ELK1_1136	chr15	99552038	99552437
Dam-ELK1_1137	chr17	57386707	57387295
Dam-ELK1_1138	chr9	58219478	58220223
Dam-ELK1_1139	chr9	96530008	96530405
Dam-ELK1_1140	chr5	151394599	151395249
Dam-ELK1_1141	chr1	182862167	182862886
Dam-ELK1_1142	chr10	127194465	127194718
Dam-ELK1_1143	chr11	116395103	116395734
Dam-ELK1_1144	chr1	74775023	74775467
Dam-ELK1_1145	chr14	55087850	55088100
Dam-ELK1_1146	chr16	28752485	28752816
Dam-ELK1_1147	chr5	137728616	137729008
Dam-ELK1_1148	chr10	79760655	79760952
Dam-ELK1_1149	chr4	147359203	147360080
Dam-ELK1_1150	chr5	37728325	37728646
Dam-ELK1_1151	chr11	96787187	96787436
Dam-ELK1_1152	chr17	25251701	25252416
Dam-ELK1_1153	chr11	55852553	55852864
Dam-ELK1_1154	chr2	25038701	25039014
Dam-ELK1_1155	chr10	119639114	119639771
Dam-ELK1_1156	chr1	75183453	75183855
Dam-ELK1_1157	chr2	26434993	26435257
Dam-ELK1_1158	chr14	102127855	102128136
Dam-ELK1_1159	chr1	153417856	153418139
Dam-ELK1_1160	chr12	56660833	56661337
Dam-ELK1_1161	chr13	47138268	47138530
Dam-ELK1_1162	chr8	34843141	34843408
Dam-ELK1_1163	chr18	24491911	24492356
Dam-ELK1_1164	chr1	173342098	173342853
Dam-ELK1_1165	chr8	113781972	113782252
Dam-ELK1_1166	chr3	87422029	87422847
Dam-ELK1_1167	chr14	65694326	65694660
Dam-ELK1_1168	chr2	25048967	25049678
Dam-ELK1_1169	chr11	98847289	98847788
Dam-ELK1_1170	chr3	103541334	103541883
Dam-ELK1_1171	chr5	138596887	138597430
Dam-ELK1_1172	chr1	94804394	94805269
Dam-ELK1_1173	chr11	75301002	75301328
Dam-ELK1_1174	chr3	88297578	88298916
Dam-ELK1_1175	chr11	101105118	101105669
Dam-ELK1_1176	chr3	69119904	69120167
Dam-ELK1_1177	chr8	86667141	86667598
Dam-ELK1_1178	chr2	155652479	155652999
Dam-ELK1_1179	chr11	115746901	115747231
Dam-ELK1_1180	chr5	35871923	35872365
Dam-ELK1_1181	chr11	75258642	75259043
Dam-ELK1_1182	chr11	97562433	97563535
Dam-ELK1_1183	chr9	22273258	22273928
Dam-ELK1_1184	chr7	19470486	19470729
Dam-ELK1_1185	chr11	117658896	117659322
Dam-ELK1_1186	chr2	30092554	30092824
Dam-ELK1_1187	chr11	69651760	69652085
Dam-ELK1_1188	chr6	35273948	35274254
Dam-ELK1_1189	chr11	53114023	53114973
Dam-ELK1_1190	chr15	98730542	98730838
Dam-ELK1_1191	chr8	126002239	126002746
Dam-ELK1_1192	chr18	74020724	74021229
Dam-ELK1_1193	chr9	66681343	66681603
Dam-ELK1_1194	chr5	112851084	112851720
Dam-ELK1_1195	chr19	7072725	7073341
Dam-ELK1_1196	chr12	32897340	32897668
Dam-ELK1_1197	chr13	101602007	101602743
Dam-ELK1_1198	chr14	32842168	32842752
Dam-ELK1_1199	chr14	54877927	54878532
Dam-ELK1_1200	chr1	75443093	75443373
Dam-ELK1_1201	chr19	41282837	41283315
Dam-ELK1_1202	chr19	46412775	46413066
Dam-ELK1_1203	chr2	11626515	11627056
Dam-ELK1_1204	chr4	133800711	133801239
Dam-ELK1_1205	chr5	143578134	143578486
Dam-ELK1_1206	chr2	122455382	122456115
Dam-ELK1_1207	chr10	127534835	127535073
Dam-ELK1_1208	chr5	118691251	118691616
Dam-ELK1_1209	chr14	26661404	26662720
Dam-ELK1_1210	chr4	43467206	43467568
Dam-ELK1_1211	chr9	106339358	106340527
Dam-ELK1_1212	chr7	118923894	118924705
Dam-ELK1_1213	chr6	86285491	86285893
Dam-ELK1_1214	chr10	79151567	79151967
Dam-ELK1_1215	chr2	112333975	112334329
Dam-ELK1_1216	chr11	30124110	30124652
Dam-ELK1_1217	chr8	129115646	129116060
Dam-ELK1_1218	chr6	8900852	8901308
Dam-ELK1_1219	chr14	34752704	34752993
Dam-ELK1_1220	chr5	114892918	114893329
Dam-ELK1_1221	chr8	107655408	107655841
Dam-ELK1_1222	chr2	25211230	25211544
Dam-ELK1_1223	chr9	103272247	103272703
Dam-ELK1_1224	chr1	154612794	154613080
Dam-ELK1_1225	chr8	124431873	124432670
Dam-ELK1_1226	chr3	89028059	89028377
Dam-ELK1_1227	chr14	76410692	76411185
Dam-ELK1_1228	chr7	28955272	28955878
Dam-ELK1_1229	chrX	155694368	155694719
Dam-ELK1_1230	chr12	112097102	112097532
Dam-ELK1_1231	chr14	12386572	12387259
Dam-ELK1_1232	chr5	67650812	67651065
Dam-ELK1_1233	chr7	129303395	129303859
Dam-ELK1_1234	chr11	88922600	88923118
Dam-ELK1_1235	chr17	87357240	87357542
Dam-ELK1_1236	chr10	62919936	62920442
Dam-ELK1_1237	chr5	92864385	92864822
Dam-ELK1_1238	chr3	36761410	36761713
Dam-ELK1_1239	chr1	133905013	133905276
Dam-ELK1_1240	chr12	80272584	80272993
Dam-ELK1_1241	chr12	113148747	113149444
Dam-ELK1_1242	chr4	155257711	155258404
Dam-ELK1_1243	chr4	141157410	141158474
Dam-ELK1_1244	chr2	93850760	93851243
Dam-ELK1_1245	chr1	43560785	43561100
Dam-ELK1_1246	chr2	153057921	153059071
Dam-ELK1_1247	chr2	58388029	58388311
Dam-ELK1_1248	chr5	117836743	117837064
Dam-ELK1_1249	chr8	113332333	113332628
Dam-ELK1_1250	chr15	83002628	83003521
Dam-ELK1_1251	chr11	94870736	94871093
Dam-ELK1_1252	chr2	169945313	169945566
Dam-ELK1_1253	chr16	35977902	35978230
Dam-ELK1_1254	chr13	17786915	17787183
Dam-ELK1_1255	chr10	77067627	77067879
Dam-ELK1_1256	chr12	86311238	86311775
Dam-ELK1_1257	chr6	117866603	117866943
Dam-ELK1_1258	chr5	122716780	122717459
Dam-ELK1_1259	chr11	95377053	95377586
Dam-ELK1_1260	chr11	115191586	115191866
Dam-ELK1_1261	chr17	31433917	31434379
Dam-ELK1_1262	chr11	57616251	57616358
Dam-ELK1_1263	chr13	104898765	104899164
Dam-ELK1_1264	chr4	34986560	34986956
Dam-ELK1_1265	chr4	141572682	141573081
Dam-ELK1_1266	chrX	136964556	136965158
Dam-ELK1_1267	chr17	26010809	26011681
Dam-ELK1_1268	chr8	25549680	25550001
Dam-ELK1_1269	chr11	93829853	93830215
Dam-ELK1_1270	chr2	112107428	112108255
Dam-ELK1_1271	chr15	68755640	68756013
Dam-ELK1_1272	chr12	114251133	114251775
Dam-ELK1_1273	chr2	164236110	164236384
Dam-ELK1_1274	chr9	115212970	115213228
Dam-ELK1_1275	chr19	6932891	6933243
Dam-ELK1_1276	chr6	55069874	55070347
Dam-ELK1_1277	chr18	84853587	84853877
Dam-ELK1_1278	chr18	62708342	62708713
Dam-ELK1_1279	chr10	126759149	126759803
Dam-ELK1_1280	chr7	52253487	52253958
Dam-ELK1_1281	chr3	7611733	7612141
Dam-ELK1_1282	chr4	138294321	138294691
Dam-ELK1_1283	chr2	79475913	79476266
Dam-ELK1_1284	chr7	53323845	53324097
Dam-ELK1_1285	chr4	46576826	46577191
Dam-ELK1_1286	chr17	31432673	31432921
Dam-ELK1_1287	chr12	106800214	106800576
Dam-ELK1_1288	chr4	43573847	43574101
Dam-ELK1_1289	chr1	167636087	167636543
Dam-ELK1_1290	chr6	50548056	50548537
Dam-ELK1_1291	chr16	17558629	17559018
Dam-ELK1_1292	chr12	55962246	55962528
Dam-ELK1_1293	chr5	17778580	17779297
Dam-ELK1_1294	chr11	49063373	49063740
Dam-ELK1_1295	chr7	52493242	52493716
Dam-ELK1_1296	chr11	80668386	80668824
Dam-ELK1_1297	chr11	31772549	31772912
Dam-ELK1_1298	chr6	114859016	114859500
Dam-ELK1_1299	chr5	137747874	137748328
Dam-ELK1_1300	chr7	29594708	29595493
Dam-ELK1_1301	chr15	76525355	76525683
Dam-ELK1_1302	chr15	81894208	81894769
Dam-ELK1_1303	chr6	85282224	85282935
Dam-ELK1_1304	chr7	39055935	39056259
Dam-ELK1_1305	chr5	35867228	35867550
Dam-ELK1_1306	chr8	73130187	73130524
Dam-ELK1_1307	chr2	32236481	32236873
Dam-ELK1_1308	chr11	98602266	98602526
Dam-ELK1_1309	chr19	47539421	47540073
Dam-ELK1_1310	chr1	182946144	182946529
Dam-ELK1_1311	chr7	132766187	132766796
Dam-ELK1_1312	chr11	117339706	117340018
Dam-ELK1_1313	chr2	136939757	136940003
Dam-ELK1_1314	chr7	31495995	31496370
Dam-ELK1_1315	chr13	55117371	55117725
Dam-ELK1_1316	chrX	71673910	71674582
Dam-ELK1_1317	chr8	4239527	4240190
Dam-ELK1_1318	chr4	129172933	129173920
Dam-ELK1_1319	chr9	44127264	44127830
Dam-ELK1_1320	chr4	104824370	104824863
Dam-ELK1_1321	chr7	119896927	119897392
Dam-ELK1_1322	chr9	50554325	50554597
Dam-ELK1_1323	chr4	151731416	151732467
Dam-ELK1_1324	chr2	146682076	146682388
Dam-ELK1_1325	chr14	54873326	54873798
Dam-ELK1_1326	chr12	106920317	106920637
Dam-ELK1_1327	chr5	124802897	124803331
Dam-ELK1_1328	chr11	117469987	117470481
Dam-ELK1_1329	chr7	29964788	29965131
Dam-ELK1_1330	chr14	32008229	32008875
Dam-ELK1_1331	chr11	54716568	54717238
Dam-ELK1_1332	chr2	162842490	162842791
Dam-ELK1_1333	chr6	91761135	91761638
Dam-ELK1_1334	chr19	53526863	53527278
Dam-ELK1_1335	chr6	28429576	28430299
Dam-ELK1_1336	chr11	61082055	61082886
Dam-ELK1_1337	chr2	154203647	154204002
Dam-ELK1_1338	chr16	15636924	15637826
Dam-ELK1_1339	chr19	11891273	11891733
Dam-ELK1_1340	chr4	134327921	134328339
Dam-ELK1_1341	chr15	10415410	10415701
Dam-ELK1_1342	chr5	34863698	34863995
Dam-ELK1_1343	chr16	94747136	94747566
Dam-ELK1_1344	chr4	124741842	124742090
Dam-ELK1_1345	chr19	38209214	38209740
Dam-ELK1_1346	chr1	43210396	43210713
Dam-ELK1_1347	chr5	31498040	31498301
Dam-ELK1_1348	chr7	28271461	28271776
Dam-ELK1_1349	chr8	87368469	87368717
Dam-ELK1_1350	chr10	79896571	79896818
Dam-ELK1_1351	chr7	108448801	108450103
Dam-ELK1_1352	chr11	98065181	98065490
Dam-ELK1_1353	chr14	70501282	70501775
Dam-ELK1_1354	chr15	66799177	66799645
Dam-ELK1_1355	chr7	151015337	151015638
Dam-ELK1_1356	chr14	31484649	31484904
Dam-ELK1_1357	chr11	115950061	115950357
Dam-ELK1_1358	chr7	19705723	19706114
Dam-ELK1_1359	chr18	84757479	84758241
Dam-ELK1_1360	chr17	26980829	26981888
Dam-ELK1_1361	chr8	107828190	107828514
Dam-ELK1_1362	chr1	153601615	153602123
Dam-ELK1_1363	chr11	101901227	101901657
Dam-ELK1_1364	chr10	80505713	80505964
Dam-ELK1_1365	chr5	136105343	136105714
Dam-ELK1_1366	chr11	72019752	72020347
Dam-ELK1_1367	chr9	114297289	114297624
Dam-ELK1_1368	chr4	125750738	125751128
Dam-ELK1_1369	chr4	45545546	45545805
Dam-ELK1_1370	chr11	72079631	72079983
Dam-ELK1_1371	chr4	89355997	89356376
Dam-ELK1_1372	chr5	136218977	136219731
Dam-ELK1_1373	chr1	174012993	174013345
Dam-ELK1_1374	chr14	100613007	100613677
Dam-ELK1_1375	chr2	152431282	152431707
Dam-ELK1_1376	chr1	36126252	36126782
Dam-ELK1_1377	chr11	6501669	6501912
Dam-ELK1_1378	chr6	97201425	97202148
Dam-ELK1_1379	chr11	121098502	121099071
Dam-ELK1_1380	chr11	59117395	59118301
Dam-ELK1_1381	chr11	65621011	65621521
Dam-ELK1_1382	chr5	29891748	29892003
Dam-ELK1_1383	chr5	123496572	123496815
Dam-ELK1_1384	chr11	69137767	69138603
Dam-ELK1_1385	chr7	52254594	52255376
Dam-ELK1_1386	chr14	31439761	31440451
Dam-ELK1_1387	chr9	108394175	108394510
Dam-ELK1_1388	chr1	74178015	74178409
Dam-ELK1_1389	chr9	121672896	121673263
Dam-ELK1_1390	chr15	84752927	84753222
Dam-ELK1_1391	chr7	134038441	134038726
Dam-ELK1_1392	chr9	106061451	106062335
Dam-ELK1_1393	chr11	72503880	72504230
Dam-ELK1_1394	chr9	63293082	63293412
Dam-ELK1_1395	chr8	23702213	23702980
Dam-ELK1_1396	chr1	184271872	184272115
Dam-ELK1_1397	chr11	69610750	69611115
Dam-ELK1_1398	chr2	180008589	180009134
Dam-ELK1_1399	chr15	37890455	37890755
Dam-ELK1_1400	chr16	25680631	25680924
Dam-ELK1_1401	chr10	41193724	41193976
Dam-ELK1_1402	chr2	30702128	30702467
Dam-ELK1_1403	chr15	97608908	97609419
Dam-ELK1_1404	chr16	29813150	29813537
Dam-ELK1_1405	chr7	148041773	148042620
Dam-ELK1_1406	chr2	91298940	91299270
Dam-ELK1_1407	chr11	94336446	94337278
Dam-ELK1_1408	chr8	83241547	83241977
Dam-ELK1_1409	chr11	95447904	95448231
Dam-ELK1_1410	chr16	32100126	32100422
Dam-ELK1_1411	chr11	116296439	116296690
Dam-ELK1_1412	chr14	27487545	27488650
Dam-ELK1_1413	chr11	54778111	54778452
Dam-ELK1_1414	chr14	71058761	71059763
Dam-ELK1_1415	chr5	124566040	124566387
Dam-ELK1_1416	chr2	35351476	35352222
Dam-ELK1_1417	chrX	131119392	131119674
Dam-ELK1_1418	chr15	81687372	81688373
Dam-ELK1_1419	chr4	4064010	4064374
Dam-ELK1_1420	chr3	88895606	88896180
Dam-ELK1_1421	chr7	117203983	117204418
Dam-ELK1_1422	chr9	110957851	110958169
Dam-ELK1_1423	chr18	53404407	53404936
Dam-ELK1_1424	chr19	10679329	10679481
Dam-ELK1_1425	chr1	137867319	137868134
Dam-ELK1_1426	chr14	21213281	21213587
Dam-ELK1_1427	chr19	5050713	5050996
Dam-ELK1_1428	chr17	25153026	25153394
Dam-ELK1_1429	chr11	98635666	98636510
Dam-ELK1_1430	chr1	173313899	173314367
Dam-ELK1_1431	chr8	87428358	87428693
Dam-ELK1_1432	chr12	76770112	76770740
Dam-ELK1_1433	chr1	44179061	44179852
Dam-ELK1_1434	chr11	79997146	79997587
Dam-ELK1_1435	chr6	34680760	34681227
Dam-ELK1_1436	chr1	46908181	46908446
Dam-ELK1_1437	chr3	57650221	57650653
Dam-ELK1_1438	chr8	4322798	4323435
Dam-ELK1_1439	chr11	68853367	68854001
Dam-ELK1_1440	chr17	34984856	34985146
Dam-ELK1_1441	chr5	93470817	93471325
Dam-ELK1_1442	chr17	35379821	35380476
Dam-ELK1_1443	chr1	89109742	89109988
Dam-ELK1_1444	chr1	129765880	129766208
Dam-ELK1_1445	chr7	149647674	149647956
Dam-ELK1_1446	chr8	86133631	86133930
Dam-ELK1_1447	chrX	91479256	91479506
Dam-ELK1_1448	chr4	138747813	138748185
Dam-ELK1_1449	chr9	18097050	18097325
Dam-ELK1_1450	chr13	74491766	74492096
Dam-ELK1_1451	chr2	179964792	179965082
Dam-ELK1_1452	chr2	80457400	80457977
Dam-ELK1_1453	chr11	4117741	4118779
Dam-ELK1_1454	chr12	82633657	82633970
Dam-ELK1_1455	chr5	122552861	122553252
Dam-ELK1_1456	chr3	87423365	87423621
Dam-ELK1_1457	chr4	137923397	137924064
Dam-ELK1_1458	chr4	134412825	134413244
Dam-ELK1_1459	chr13	67005708	67006010
Dam-ELK1_1460	chr6	83745611	83746079
Dam-ELK1_1461	chr14	26512110	26513241
Dam-ELK1_1462	chr4	140857821	140858180
Dam-ELK1_1463	chr12	74225170	74225528
Dam-ELK1_1464	chr11	102957017	102958059
Dam-ELK1_1465	chr15	101091365	101091848
Dam-ELK1_1466	chr16	11254545	11254868
Dam-ELK1_1467	chr14	55035865	55036289
Dam-ELK1_1468	chr17	66232568	66233571
Dam-ELK1_1469	chr19	41555967	41556298
Dam-ELK1_1470	chr17	37087665	37088102
Dam-ELK1_1471	chr15	5194607	5195051
Dam-ELK1_1472	chr2	27566106	27566414
Dam-ELK1_1473	chr13	6645925	6646317
Dam-ELK1_1474	chr10	127648089	127648502
Dam-ELK1_1475	chr17	24874480	24874977
Dam-ELK1_1476	chr11	70246540	70247180
Dam-ELK1_1477	chr11	60878619	60879156
Dam-ELK1_1478	chr3	97456162	97456492
Dam-ELK1_1479	chr4	43059792	43060240
Dam-ELK1_1480	chr12	103945088	103945485
Dam-ELK1_1481	chr10	68681377	68681643
Dam-ELK1_1482	chr15	78728261	78728521
Dam-ELK1_1483	chr10	30523808	30524158
Dam-ELK1_1484	chr15	99479763	99480097
Dam-ELK1_1485	chr14	66914884	66915333
Dam-ELK1_1486	chr11	115264861	115265223
Dam-ELK1_1487	chr6	50212439	50213357
Dam-ELK1_1488	chr1	135976333	135976731
Dam-ELK1_1489	chr5	114764963	114765380
Dam-ELK1_1490	chr11	32434709	32435075
Dam-ELK1_1491	chr2	31100012	31100331
Dam-ELK1_1492	chr11	94851479	94851750
Dam-ELK1_1493	chr8	113444556	113444954
Dam-ELK1_1494	chr5	137734421	137734747
Dam-ELK1_1495	chr17	34057086	34057349
Dam-ELK1_1496	chr11	101035336	101035669
Dam-ELK1_1497	chr2	26215536	26216183
Dam-ELK1_1498	chr4	40670295	40670570
Dam-ELK1_1499	chr8	13676372	13676664
Dam-ELK1_1500	chr2	92299502	92300086
Dam-ELK1_1501	chr12	76700792	76701190
Dam-ELK1_1502	chr16	21945966	21946962
Dam-ELK1_1503	chr5	92819238	92819563
Dam-ELK1_1504	chr13	114406263	114406661
Dam-ELK1_1505	chr15	7086730	7087271
Dam-ELK1_1506	chr1	24684859	24685230
Dam-ELK1_1507	chr4	133108819	133109440
Dam-ELK1_1508	chr4	149611988	149612238
Dam-ELK1_1509	chr4	151468611	151469154
Dam-ELK1_1510	chr7	52973128	52973505
Dam-ELK1_1511	chr9	66192930	66193184
Dam-ELK1_1512	chr12	113854922	113855531
Dam-ELK1_1513	chr17	73187708	73188233
Dam-ELK1_1514	chr11	60874963	60875567
Dam-ELK1_1515	chr10	127192490	127193150
Dam-ELK1_1516	chr7	52252460	52253047
Dam-ELK1_1517	chr17	21587730	21588001
Dam-ELK1_1518	chr11	94940394	94941080
Dam-ELK1_1519	chr5	125871841	125872497
Dam-ELK1_1520	chr2	90908943	90909683
Dam-ELK1_1521	chr4	132925469	132926105
Dam-ELK1_1522	chr14	55052617	55052911
Dam-ELK1_1523	chr7	106608964	106609210
Dam-ELK1_1524	chr4	108505399	108505536
Dam-ELK1_1525	chr19	5911716	5912081
Dam-ELK1_1526	chr2	104583296	104583548
Dam-ELK1_1527	chr11	100949246	100949671
Dam-ELK1_1528	chr1	95239874	95240126
Dam-ELK1_1529	chr12	60114183	60114556
Dam-ELK1_1530	chr15	36541792	36542257
Dam-ELK1_1531	chr1	74819060	74819390
Dam-ELK1_1532	chr1	34908350	34908702
Dam-ELK1_1533	chr16	20694232	20694864
Dam-ELK1_1534	chr6	28345740	28346003
Dam-ELK1_1535	chr4	128795940	128796265
Dam-ELK1_1536	chr5	108560869	108561197
Dam-ELK1_1537	chr10	41237915	41238511
Dam-ELK1_1538	chr11	117642332	117642979
Dam-ELK1_1539	chr12	4847838	4848094
Dam-ELK1_1540	chr2	25212218	25212725
Dam-ELK1_1541	chr6	21900270	21900536
Dam-ELK1_1542	chr12	70329005	70329435
Dam-ELK1_1543	chr10	126728740	126729222
Dam-ELK1_1544	chr15	98401390	98401682
Dam-ELK1_1545	chr16	13358781	13359433
Dam-ELK1_1546	chr1	137030101	137030754
Dam-ELK1_1547	chr3	95797734	95798364
Dam-ELK1_1548	chr4	134051900	134052783
Dam-ELK1_1549	chr3	28679306	28679558
Dam-ELK1_1550	chr10	84587720	84588002
Dam-ELK1_1551	chr2	165617827	165618300
Dam-ELK1_1552	chr9	122929235	122929860
Dam-ELK1_1553	chr5	20388212	20388500
Dam-ELK1_1554	chr4	153546651	153546924
Dam-ELK1_1555	chr19	38120688	38121146
Dam-ELK1_1556	chr1	165248400	165248723
Dam-ELK1_1557	chr16	5134690	5135658
Dam-ELK1_1558	chr14	55045348	55045662
Dam-ELK1_1559	chr4	109334777	109335037
Dam-ELK1_1560	chr11	50103866	50104189
Dam-ELK1_1561	chr17	56149684	56149943
Dam-ELK1_1562	chr11	60593468	60593832
Dam-ELK1_1563	chr4	138986049	138986772
Dam-ELK1_1564	chr17	80607054	80607519
Dam-ELK1_1565	chr7	138704312	138704602
Dam-ELK1_1566	chr15	41701203	41701505
Dam-ELK1_1567	chr11	4604449	4604789
Dam-ELK1_1568	chr2	180777672	180778036
Dam-ELK1_1569	chr4	154441999	154442283
Dam-ELK1_1570	chr4	116300435	116300808
Dam-ELK1_1571	chr3	157699423	157700019
Dam-ELK1_1572	chr11	120208696	120208937
Dam-ELK1_1573	chr9	53056288	53056708
Dam-ELK1_1574	chr11	69806067	69806315
Dam-ELK1_1575	chr10	79214454	79214767
Dam-ELK1_1576	chr17	46289396	46290159
Dam-ELK1_1577	chr11	43514131	43514540
Dam-ELK1_1578	chr15	81688806	81689181
Dam-ELK1_1579	chr6	122343511	122343805
Dam-ELK1_1580	chr7	134888778	134889065
Dam-ELK1_1581	chr7	133819403	133819683
Dam-ELK1_1582	chr2	91489721	91490908
Dam-ELK1_1583	chr4	141171714	141172076
Dam-ELK1_1584	chr7	152473175	152473564
Dam-ELK1_1585	chr7	87405970	87406278
Dam-ELK1_1586	chr8	127302571	127302823
Dam-ELK1_1587	chr5	31600437	31600847
Dam-ELK1_1588	chr8	107900996	107901266
Dam-ELK1_1589	chr10	80086329	80086865
Dam-ELK1_1590	chr3	88257824	88258248
Dam-ELK1_1591	chr18	36119962	36120239
Dam-ELK1_1592	chr3	108247240	108247538
Dam-ELK1_1593	chr17	25253033	25253355
Dam-ELK1_1594	chr11	93828973	93829264
Dam-ELK1_1595	chr19	5963869	5964161
Dam-ELK1_1596	chr5	98462499	98462938
Dam-ELK1_1597	chr6	83009659	83010268
Dam-ELK1_1598	chr7	133845623	133846466
Dam-ELK1_1599	chr11	77979777	77980095
Dam-ELK1_1600	chr8	35170722	35171351
Dam-ELK1_1601	chr10	18027584	18027877
Dam-ELK1_1602	chr11	94515165	94515279
Dam-ELK1_1603	chr15	72890722	72891046
Dam-ELK1_1604	chr11	115478483	115478747
Dam-ELK1_1605	chr11	102964209	102964627
Dam-ELK1_1606	chr14	76158132	76158435
Dam-ELK1_1607	chr7	51809284	51809679
Dam-ELK1_1608	chr13	91063638	91063892
Dam-ELK1_1609	chr10	80753198	80753533
Dam-ELK1_1610	chr11	60644424	60644992
Dam-ELK1_1611	chr9	56775250	56775647
Dam-ELK1_1612	chr2	151804123	151804664
Dam-ELK1_1613	chr5	123351026	123351342
Dam-ELK1_1614	chr2	84555820	84556104
Dam-ELK1_1615	chr11	102912726	102913003
Dam-ELK1_1616	chr11	97642860	97643486
Dam-ELK1_1617	chr2	24904411	24904747
Dam-ELK1_1618	chr17	48572111	48572519
Dam-ELK1_1619	chr4	140800507	140800796
Dam-ELK1_1620	chr2	103811571	103811905
Dam-ELK1_1621	chr17	47748772	47749101
Dam-ELK1_1622	chr10	82321760	82322010
Dam-ELK1_1623	chr1	153603352	153604039
Dam-ELK1_1624	chr13	107811195	107811492
Dam-ELK1_1625	chr12	85455939	85456202
Dam-ELK1_1626	chr8	27103906	27104281
Dam-ELK1_1627	chr17	29143798	29144088
Dam-ELK1_1628	chr17	34260244	34261235
Dam-ELK1_1629	chr15	82851783	82852215
Dam-ELK1_1630	chr1	95584141	95584382
Dam-ELK1_1631	chr7	34885277	34885838
Dam-ELK1_1632	chr1	64578202	64578596
Dam-ELK1_1633	chr4	102891224	102891537
Dam-ELK1_1634	chr7	117439773	117440426
Dam-ELK1_1635	chr8	74085274	74085519
Dam-ELK1_1636	chr19	41279411	41279779
Dam-ELK1_1637	chr1	136284696	136284982
Dam-ELK1_1638	chr6	29418247	29418745
Dam-ELK1_1639	chr19	55918740	55919452
Dam-ELK1_1640	chr11	61728425	61728905
Dam-ELK1_1641	chr15	78254640	78254890
Dam-ELK1_1642	chr2	30060456	30060831
Dam-ELK1_1643	chr6	124779731	124780050
Dam-ELK1_1644	chr6	119285630	119285881
Dam-ELK1_1645	chr15	99056410	99056748
Dam-ELK1_1646	chr9	44293001	44293389
Dam-ELK1_1647	chr11	109163861	109164182
Dam-ELK1_1648	chr10	60914244	60914484
Dam-ELK1_1649	chr15	80085376	80085676
Dam-ELK1_1650	chr4	133575723	133576300
Dam-ELK1_1651	chr6	24479641	24480036
Dam-ELK1_1652	chr11	5050355	5050646
Dam-ELK1_1653	chr9	41931135	41931653
Dam-ELK1_1654	chr18	37811030	37811313
Dam-ELK1_1655	chr2	164704129	164704491
Dam-ELK1_1656	chr5	91328848	91329385
Dam-ELK1_1657	chr16	10782965	10783505
Dam-ELK1_1658	chr5	8996243	8996525
Dam-ELK1_1659	chr19	4508203	4508711
Dam-ELK1_1660	chr15	9003459	9003821
Dam-ELK1_1661	chr17	56428564	56429194
Dam-ELK1_1662	chr2	24829432	24829834
Dam-ELK1_1663	chr14	60870516	60871169
Dam-ELK1_1664	chr11	70435123	70435488
Dam-ELK1_1665	chr7	151798977	151799853
Dam-ELK1_1666	chr14	70473640	70474147
Dam-ELK1_1667	chr10	79460136	79460441
Dam-ELK1_1668	chr2	119622884	119623289
Dam-ELK1_1669	chr2	174295223	174295547
Dam-ELK1_1670	chr2	4804550	4804817
Dam-ELK1_1671	chr11	119802369	119802681
Dam-ELK1_1672	chr5	92778049	92778417
Dam-ELK1_1673	chr2	164648265	164648593
Dam-ELK1_1674	chr5	67651641	67652262
Dam-ELK1_1675	chr4	43036129	43036722
Dam-ELK1_1676	chr8	108041872	108042266
Dam-ELK1_1677	chr1	129572365	129573105
Dam-ELK1_1678	chr12	77277617	77278118
Dam-ELK1_1679	chr8	114256867	114257627
Dam-ELK1_1680	chr2	26865907	26866205
Dam-ELK1_1681	chr11	3059914	3060390
Dam-ELK1_1682	chr8	108212031	108212431
Dam-ELK1_1683	chr6	72473218	72473547
Dam-ELK1_1684	chr11	68854888	68855145
Dam-ELK1_1685	chr10	93509127	93509453
Dam-ELK1_1686	chr1	183782375	183782770
Dam-ELK1_1687	chr2	156023112	156023765
Dam-ELK1_1688	chr11	94345676	94346095
Dam-ELK1_1689	chr1	94830622	94830873
Dam-ELK1_1690	chr9	108471377	108471825
Dam-ELK1_1691	chr3	135392293	135392727
Dam-ELK1_1692	chr3	130728347	130728640
Dam-ELK1_1693	chr2	25476228	25476523
Dam-ELK1_1694	chr5	138226081	138226442
Dam-ELK1_1695	chr2	32822149	32822633
Dam-ELK1_1696	chr15	101203160	101203470
Dam-ELK1_1697	chr6	92894353	92894876
Dam-ELK1_1698	chr17	25930617	25931079
Dam-ELK1_1699	chr4	135800148	135800438
Dam-ELK1_1700	chr13	94074829	94075126
Dam-ELK1_1701	chr15	76307047	76307410
Dam-ELK1_1702	chr4	155424483	155425020
Dam-ELK1_1703	chr7	149556120	149556648
Dam-ELK1_1704	chr19	4839565	4840164
Dam-ELK1_1705	chr15	76885119	76885377
Dam-ELK1_1706	chr10	41194942	41195201
Dam-ELK1_1707	chr10	61445025	61445303
Dam-ELK1_1708	chr13	100271935	100272460
Dam-ELK1_1709	chr16	35933251	35933535
Dam-ELK1_1710	chr10	120911974	120912261
Dam-ELK1_1711	chr17	35784963	35785207
Dam-ELK1_1712	chr1	95698717	95699097
Dam-ELK1_1713	chrX	101678663	101679112
Dam-ELK1_1714	chr15	79912194	79912593
Dam-ELK1_1715	chr2	167314295	167314554
Dam-ELK1_1716	chr14	56299663	56299978
Dam-ELK1_1717	chr15	103284706	103285019
Dam-ELK1_1718	chr6	99717052	99718226
Dam-ELK1_1719	chr17	63846486	63847166
Dam-ELK1_1720	chr10	80847210	80847550
Dam-ELK1_1721	chr5	115107820	115108091
Dam-ELK1_1722	chr8	23919004	23919320
Dam-ELK1_1723	chr15	76540066	76540603
Dam-ELK1_1724	chr4	129496116	129496889
Dam-ELK1_1725	chr11	77981973	77982333
Dam-ELK1_1726	chr8	108130531	108130846
Dam-ELK1_1727	chrX	45266646	45266971
Dam-ELK1_1728	chr1	136390500	136391014
Dam-ELK1_1729	chr14	104920810	104921171
Dam-ELK1_1730	chr4	140634016	140634293
Dam-ELK1_1731	chr8	108211217	108211756
Dam-ELK1_1732	chr14	21474658	21474923
Dam-ELK1_1733	chr1	156994033	156994677
Dam-ELK1_1734	chr8	36652696	36653069
Dam-ELK1_1735	chr9	30749514	30749770
Dam-ELK1_1736	chr1	58502111	58502648
Dam-ELK1_1737	chr11	79547828	79548156
Dam-ELK1_1738	chr13	55655113	55655461
Dam-ELK1_1739	chr6	83394313	83394864
Dam-ELK1_1740	chr14	55556441	55556694
Dam-ELK1_1741	chr16	22445122	22445444
Dam-ELK1_1742	chr18	4920843	4921166
Dam-ELK1_1743	chr10	61157301	61157538
Dam-ELK1_1744	chr8	127044952	127045585
Dam-ELK1_1745	chr16	44138499	44138967
Dam-ELK1_1746	chr11	77989643	77989889
Dam-ELK1_1747	chr1	120219183	120219575
Dam-ELK1_1748	chr18	47118227	47118484
Dam-ELK1_1749	chr14	47379763	47380056
Dam-ELK1_1750	chr2	152241199	152241525
Dam-ELK1_1751	chr16	20611400	20611772
Dam-ELK1_1752	chr17	25219440	25219738
Dam-ELK1_1753	chr2	119979306	119979562
Dam-ELK1_1754	chr12	8320661	8320941
Dam-ELK1_1755	chr13	113450909	113451224
Dam-ELK1_1756	chr12	32183606	32184187
Dam-ELK1_1757	chr19	5729912	5730267
Dam-ELK1_1758	chr7	146273595	146273963
Dam-ELK1_1759	chr16	59638790	59639076
Dam-ELK1_1760	chr3	103595675	103596005
Dam-ELK1_1761	chr8	86592456	86592703
Dam-ELK1_1762	chr2	153741086	153741432
Dam-ELK1_1763	chr17	15962445	15962746
Dam-ELK1_1764	chr10	117230300	117230585
Dam-ELK1_1765	chr4	151669504	151669924
Dam-ELK1_1766	chr2	180009484	180009813
Dam-ELK1_1767	chr7	28934098	28934493
Dam-ELK1_1768	chr7	35538880	35539187
Dam-ELK1_1769	chr12	112651911	112652266
Dam-ELK1_1770	chr11	70247915	70248393
Dam-ELK1_1771	chr3	88101172	88101486
Dam-ELK1_1772	chr17	24615140	24615426
Dam-ELK1_1773	chr19	10462502	10463073
Dam-ELK1_1774	chr5	30946452	30947041
Dam-ELK1_1775	chr2	152761189	152761484
Dam-ELK1_1776	chr1	91000179	91000523
Dam-ELK1_1777	chr11	60746164	60746456
Dam-ELK1_1778	chr15	58160781	58161394
Dam-ELK1_1779	chr17	80462226	80462539
Dam-ELK1_1780	chrX	23272280	23272699
Dam-ELK1_1781	chr11	69436407	69436752
Dam-ELK1_1782	chr9	54548030	54548401
Dam-ELK1_1783	chr8	42199829	42200114
Dam-ELK1_1784	chr3	87604616	87604873
Dam-ELK1_1785	chr12	86814866	86815138
Dam-ELK1_1786	chr9	108552287	108552690
Dam-ELK1_1787	chrX	69061429	69061790
Dam-ELK1_1788	chr4	132833372	132833710
Dam-ELK1_1789	chr11	120441777	120442029
Dam-ELK1_1790	chr5	130732614	130732861
Dam-ELK1_1791	chr2	162485457	162485726
Dam-ELK1_1792	chr12	114380131	114380503
Dam-ELK1_1793	chr17	37407663	37408084
Dam-ELK1_1794	chr7	17366689	17366979
Dam-ELK1_1795	chr13	21544881	21545362
Dam-ELK1_1796	chr1	173165301	173165668
Dam-ELK1_1797	chr7	25373322	25373617
Dam-ELK1_1798	chr15	5066496	5066786
Dam-ELK1_1799	chr4	149071473	149071881
Dam-ELK1_1800	chr13	9277304	9277983
Dam-ELK1_1801	chr14	121308458	121308773
Dam-ELK1_1802	chr8	113861905	113862502
Dam-ELK1_1803	chr6	59148290	59148570
Dam-ELK1_1804	chr5	73791357	73791642

## Sheet: 6 - ELK1-Dam
peak	chromosome	start	end
ELK1-Dam_1	chrX	20513342	20514369
ELK1-Dam_2	chr10	66999695	67000804
ELK1-Dam_3	chr9	30234768	30235317
ELK1-Dam_4	chr2	157192591	157193425
ELK1-Dam_5	chr9	20956887	20958758
ELK1-Dam_6	chr15	74508201	74508930
ELK1-Dam_7	chr14	26514380	26515486
ELK1-Dam_8	chr11	95171541	95172231
ELK1-Dam_9	chr11	69208415	69209316
ELK1-Dam_10	chr6	113326743	113327400
ELK1-Dam_11	chr17	33897242	33897847
ELK1-Dam_12	chr18	36919302	36920222
ELK1-Dam_13	chr7	128218439	128219405
ELK1-Dam_14	chr2	4933728	4935649
ELK1-Dam_15	chr8	87187263	87188260
ELK1-Dam_16	chr16	18811602	18812516
ELK1-Dam_17	chr11	59653387	59654355
ELK1-Dam_18	chr7	52241982	52242735
ELK1-Dam_19	chr1	34496183	34496830
ELK1-Dam_20	chr10	98722475	98724094
ELK1-Dam_21	chr17	28218233	28219383
ELK1-Dam_22	chr11	119959942	119960961
ELK1-Dam_23	chr11	54680731	54681564
ELK1-Dam_24	chr15	99082299	99083280
ELK1-Dam_25	chr1	74410607	74411187
ELK1-Dam_26	chr2	30060164	30062880
ELK1-Dam_27	chr6	124989230	124989866
ELK1-Dam_28	chr1	135805336	135806239
ELK1-Dam_29	chr8	3676423	3677217
ELK1-Dam_30	chr7	28017641	28017974
ELK1-Dam_31	chr7	149573864	149574727
ELK1-Dam_32	chr3	95461854	95462436
ELK1-Dam_33	chr9	108166663	108167368
ELK1-Dam_34	chr4	143002375	143003290
ELK1-Dam_35	chr12	16899763	16900711
ELK1-Dam_36	chr8	124986933	124988272
ELK1-Dam_37	chr11	61308702	61309754
ELK1-Dam_38	chr1	136310797	136311954
ELK1-Dam_39	chr9	45819947	45820567
ELK1-Dam_40	chr19	11985923	11986818
ELK1-Dam_41	chr15	102034806	102035528
ELK1-Dam_42	chr7	19801410	19802474
ELK1-Dam_43	chr11	70465851	70466709
ELK1-Dam_44	chr9	21807286	21808671
ELK1-Dam_45	chr11	68666749	68667839
ELK1-Dam_46	chr4	132088425	132089044
ELK1-Dam_47	chr14	21493900	21495044
ELK1-Dam_48	chr7	3644655	3645689
ELK1-Dam_49	chr16	32608067	32608917
ELK1-Dam_50	chr8	27103434	27105447
ELK1-Dam_51	chr15	102033099	102033660
ELK1-Dam_52	chr8	87502602	87503861
ELK1-Dam_53	chr12	114392342	114393656
ELK1-Dam_54	chr4	154594172	154595008
ELK1-Dam_55	chr10	127846996	127848160
ELK1-Dam_56	chr15	99650218	99652005
ELK1-Dam_57	chr6	72311421	72312701
ELK1-Dam_58	chr5	137591925	137592914
ELK1-Dam_59	chr18	46757542	46758357
ELK1-Dam_60	chr4	147999978	148000237
ELK1-Dam_61	chr1	9534988	9535541
ELK1-Dam_62	chr15	76190286	76191340
ELK1-Dam_63	chr7	52271899	52272853
ELK1-Dam_64	chr8	107165413	107165927
ELK1-Dam_65	chr10	79689821	79690572
ELK1-Dam_66	chr10	126631619	126632158
ELK1-Dam_67	chr2	80419117	80420460
ELK1-Dam_68	chr4	154390527	154391054
ELK1-Dam_69	chr10	120196935	120197665
ELK1-Dam_70	chr10	78037775	78038499
ELK1-Dam_71	chr11	75399159	75399963
ELK1-Dam_72	chr14	70205535	70206762
ELK1-Dam_73	chr5	125872967	125873583
ELK1-Dam_74	chr17	34763106	34763653
ELK1-Dam_75	chr11	75465471	75467236
ELK1-Dam_76	chr19	7067000	7068138
ELK1-Dam_77	chr12	56594060	56594840
ELK1-Dam_78	chr19	7280815	7281569
ELK1-Dam_79	chr7	29580707	29581717
ELK1-Dam_80	chr17	29993558	29994487
ELK1-Dam_81	chr7	28589119	28590399
ELK1-Dam_82	chr6	86321038	86322022
ELK1-Dam_83	chr5	142939199	142939768
ELK1-Dam_84	chr11	120532998	120533534
ELK1-Dam_85	chr11	70460779	70462411
ELK1-Dam_86	chr2	37635813	37636909
ELK1-Dam_87	chr17	5117410	5118078
ELK1-Dam_88	chr13	81848507	81849643
ELK1-Dam_89	chr2	179989027	179990280
ELK1-Dam_90	chr4	133652690	133653541
ELK1-Dam_91	chr6	120772100	120772932
ELK1-Dam_92	chr6	113328527	113329738
ELK1-Dam_93	chr4	135700139	135701377
ELK1-Dam_94	chr8	116158936	116160173
ELK1-Dam_95	chr16	11252236	11253154
ELK1-Dam_96	chr5	122552167	122553448
ELK1-Dam_97	chr12	31269473	31270472
ELK1-Dam_98	chr15	78940302	78941134
ELK1-Dam_99	chr15	99360993	99361683
ELK1-Dam_100	chr1	134213436	134214486
ELK1-Dam_101	chr19	5488102	5490147
ELK1-Dam_102	chr11	98220024	98220975
ELK1-Dam_103	chr11	93828973	93830215
ELK1-Dam_104	chr16	38522782	38523718
ELK1-Dam_105	chr1	87691033	87691628
ELK1-Dam_106	chr11	78135561	78137267
ELK1-Dam_107	chr8	122301524	122302450
ELK1-Dam_108	chr15	84866000	84866936
ELK1-Dam_109	chr10	127929870	127930521
ELK1-Dam_110	chr11	60748281	60749871
ELK1-Dam_111	chr11	100483896	100484668
ELK1-Dam_112	chr1	16094372	16095082
ELK1-Dam_113	chr5	122730331	122731678
ELK1-Dam_114	chr11	77843620	77845384
ELK1-Dam_115	chr2	104429898	104430850
ELK1-Dam_116	chr17	72101458	72102566
ELK1-Dam_117	chr2	32426115	32426385
ELK1-Dam_118	chr3	105674989	105675581
ELK1-Dam_119	chr1	58087080	58087675
ELK1-Dam_120	chr7	28141968	28142919
ELK1-Dam_121	chr11	94928384	94929200
ELK1-Dam_122	chr17	27758767	27759575
ELK1-Dam_123	chr3	110053717	110054090
ELK1-Dam_124	chr11	68886366	68886784
ELK1-Dam_125	chr8	72826316	72826852
ELK1-Dam_126	chr15	103138644	103139694
ELK1-Dam_127	chr1	92850725	92851117
ELK1-Dam_128	chr7	134004831	134006214
ELK1-Dam_129	chr17	31433801	31434638
ELK1-Dam_130	chr13	67585253	67585800
ELK1-Dam_131	chr1	30824297	30824877
ELK1-Dam_132	chr3	122816841	122817765
ELK1-Dam_133	chr8	97604561	97605442
ELK1-Dam_134	chr17	31995160	31996071
ELK1-Dam_135	chr9	44168994	44169768
ELK1-Dam_136	chr7	19991535	19992012
ELK1-Dam_137	chr11	60590570	60592225
ELK1-Dam_138	chr11	98602086	98602717
ELK1-Dam_139	chr15	78706610	78707232
ELK1-Dam_140	chr9	74822961	74823605
ELK1-Dam_141	chr5	122045025	122045398
ELK1-Dam_142	chr8	90886509	90887426
ELK1-Dam_143	chr3	138189137	138189940
ELK1-Dam_144	chr10	128359150	128361007
ELK1-Dam_145	chr10	80630655	80631909
ELK1-Dam_146	chr6	124365242	124365753
ELK1-Dam_147	chr11	4022469	4024708
ELK1-Dam_148	chr17	80461747	80462653
ELK1-Dam_149	chr10	126507237	126507826
ELK1-Dam_150	chr5	107715867	107716839
ELK1-Dam_151	chr8	86794027	86794670
ELK1-Dam_152	chr17	8504567	8505615
ELK1-Dam_153	chr8	87188799	87189147
ELK1-Dam_154	chr9	42914243	42915103
ELK1-Dam_155	chr5	92391392	92391859
ELK1-Dam_156	chr11	48612766	48614991
ELK1-Dam_157	chr7	151015337	151015776
ELK1-Dam_158	chr4	147358925	147360189
ELK1-Dam_159	chr7	27980499	27981576
ELK1-Dam_160	chr5	145724506	145725068
ELK1-Dam_161	chr5	144983541	144983872
ELK1-Dam_162	chr11	95122080	95122705
ELK1-Dam_163	chr7	149645890	149647847
ELK1-Dam_164	chr11	114530551	114531365
ELK1-Dam_165	chr11	32125415	32126074
ELK1-Dam_166	chr6	85865218	85865779
ELK1-Dam_167	chr8	72653690	72654342
ELK1-Dam_168	chr2	155652210	155653073
ELK1-Dam_169	chr4	128799417	128800096
ELK1-Dam_170	chr17	35957911	35959193
ELK1-Dam_171	chr8	97057594	97059181
ELK1-Dam_172	chr8	126818629	126819576
ELK1-Dam_173	chr2	26757730	26758896
ELK1-Dam_174	chr15	78359010	78359560
ELK1-Dam_175	chr1	157404588	157404892
ELK1-Dam_176	chr2	179991046	179991381
ELK1-Dam_177	chr16	15636924	15637930
ELK1-Dam_178	chr17	29406172	29406937
ELK1-Dam_179	chr9	20448062	20448941
ELK1-Dam_180	chr8	123062350	123063283
ELK1-Dam_181	chr13	55464025	55464527
ELK1-Dam_182	chr7	29526782	29527583
ELK1-Dam_183	chr3	37318782	37319188
ELK1-Dam_184	chr17	46815995	46816502
ELK1-Dam_185	chr4	108564889	108565352
ELK1-Dam_186	chr3	89006572	89006991
ELK1-Dam_187	chr15	101097749	101098242
ELK1-Dam_188	chr8	32221382	32222067
ELK1-Dam_189	chr1	82313522	82313999
ELK1-Dam_190	chr14	27487284	27488576
ELK1-Dam_191	chr11	113511584	113512444
ELK1-Dam_192	chr9	22273258	22274149
ELK1-Dam_193	chr9	45636129	45637184
ELK1-Dam_194	chr10	41023102	41023972
ELK1-Dam_195	chr4	132795412	132796785
ELK1-Dam_196	chr7	134613653	134615042
ELK1-Dam_197	chr11	119775542	119776638
ELK1-Dam_198	chr5	23898784	23899817
ELK1-Dam_199	chr7	31410730	31411407
ELK1-Dam_200	chr19	4096345	4097303
ELK1-Dam_201	chr14	70998596	70999105
ELK1-Dam_202	chr12	92828840	92829563
ELK1-Dam_203	chr2	51004762	51005722
ELK1-Dam_204	chr11	94851333	94852059
ELK1-Dam_205	chr19	47654647	47655418
ELK1-Dam_206	chr7	88049741	88050470
ELK1-Dam_207	chr5	76954697	76955155
ELK1-Dam_208	chr17	17762102	17763021
ELK1-Dam_209	chr7	132695978	132696798
ELK1-Dam_210	chr1	155038311	155038997
ELK1-Dam_211	chr9	65043060	65043924
ELK1-Dam_212	chr12	119080491	119080795
ELK1-Dam_213	chr8	49079577	49081039
ELK1-Dam_214	chr10	41237678	41238686
ELK1-Dam_215	chr2	156907144	156908697
ELK1-Dam_216	chr11	84336471	84337444
ELK1-Dam_217	chr15	10416102	10417042
ELK1-Dam_218	chr8	123155796	123157225
ELK1-Dam_219	chr17	56748675	56749632
ELK1-Dam_220	chr16	35364332	35364668
ELK1-Dam_221	chr10	41193382	41194097
ELK1-Dam_222	chr4	155266815	155268268
ELK1-Dam_223	chr8	72663280	72664067
ELK1-Dam_224	chr11	102158992	102159565
ELK1-Dam_225	chr7	28713850	28714356
ELK1-Dam_226	chr1	92851553	92851920
ELK1-Dam_227	chr8	114463983	114464615
ELK1-Dam_228	chr10	81090060	81090506
ELK1-Dam_229	chr11	19819587	19820252
ELK1-Dam_230	chr11	83001530	83002254
ELK1-Dam_231	chr4	137214230	137214999
ELK1-Dam_232	chr9	56921951	56923225
ELK1-Dam_233	chr13	55423382	55424429
ELK1-Dam_234	chr7	29964512	29965266
ELK1-Dam_235	chr11	6445788	6446220
ELK1-Dam_236	chr8	13198506	13200032
ELK1-Dam_237	chr10	80261000	80261397
ELK1-Dam_238	chr12	109607954	109609121
ELK1-Dam_239	chr2	119301981	119302651
ELK1-Dam_240	chr5	74927748	74928117
ELK1-Dam_241	chr15	76553450	76554951
ELK1-Dam_242	chr5	92864316	92864926
ELK1-Dam_243	chr15	75759145	75760190
ELK1-Dam_244	chr3	87331158	87332839
ELK1-Dam_245	chr1	184449908	184450556
ELK1-Dam_246	chr4	108672436	108673616
ELK1-Dam_247	chr17	25152951	25153766
ELK1-Dam_248	chrX	68618669	68619741
ELK1-Dam_249	chr1	155595207	155596439
ELK1-Dam_250	chr7	34884644	34885171
ELK1-Dam_251	chr7	54051859	54052187
ELK1-Dam_252	chr4	129498369	129498879
ELK1-Dam_253	chr4	9596518	9597548
ELK1-Dam_254	chr19	43598024	43599385
ELK1-Dam_255	chr14	55633434	55634502
ELK1-Dam_256	chr12	88541414	88542404
ELK1-Dam_257	chr1	36603245	36604382
ELK1-Dam_258	chr12	88729362	88729888
ELK1-Dam_259	chr19	29141804	29142267
ELK1-Dam_260	chr11	68910899	68913422
ELK1-Dam_261	chr3	88100639	88101703
ELK1-Dam_262	chr5	130646694	130647199
ELK1-Dam_263	chr2	29102202	29102844
ELK1-Dam_264	chr19	5433819	5434379
ELK1-Dam_265	chr4	57928341	57928667
ELK1-Dam_266	chr4	115815910	115816799
ELK1-Dam_267	chr15	98463689	98464081
ELK1-Dam_268	chr4	43591685	43592565
ELK1-Dam_269	chr6	136829135	136829466
ELK1-Dam_270	chr17	25965227	25966750
ELK1-Dam_271	chr7	30980042	30981684
ELK1-Dam_272	chr2	156902312	156903165
ELK1-Dam_273	chr2	164703749	164704594
ELK1-Dam_274	chr11	100948141	100948533
ELK1-Dam_275	chr11	98241051	98241595
ELK1-Dam_276	chr3	96723404	96723952
ELK1-Dam_277	chr19	53112027	53112701
ELK1-Dam_278	chr7	87377815	87378281
ELK1-Dam_279	chr4	116797291	116798168
ELK1-Dam_280	chr3	145314623	145316219
ELK1-Dam_281	chr8	96923145	96923503
ELK1-Dam_282	chr4	128802942	128803777
ELK1-Dam_283	chr6	113388763	113389393
ELK1-Dam_284	chr8	106771071	106771951
ELK1-Dam_285	chr1	66908556	66909333
ELK1-Dam_286	chr15	89040301	89041223
ELK1-Dam_287	chr2	167328219	167328546
ELK1-Dam_288	chr4	56961820	56962901
ELK1-Dam_289	chr11	32122848	32124624
ELK1-Dam_290	chr17	56428564	56429485
ELK1-Dam_291	chr17	24593302	24593768
ELK1-Dam_292	chr4	133648444	133648936
ELK1-Dam_293	chr1	135979893	135981182
ELK1-Dam_294	chr8	73289430	73290405
ELK1-Dam_295	chr15	101932152	101933032
ELK1-Dam_296	chr5	148672484	148673594
ELK1-Dam_297	chrX	69061215	69061921
ELK1-Dam_298	chrX	7234058	7234529
ELK1-Dam_299	chr9	107242249	107242580
ELK1-Dam_300	chr10	82415275	82416045
ELK1-Dam_301	chr10	20067966	20068584
ELK1-Dam_302	chr15	81976480	81977318
ELK1-Dam_303	chr14	63380665	63381520
ELK1-Dam_304	chr18	24147767	24148490
ELK1-Dam_305	chr19	5273771	5274393
ELK1-Dam_306	chr17	11033949	11035211
ELK1-Dam_307	chr4	128405607	128407229
ELK1-Dam_308	chr6	113427704	113428977
ELK1-Dam_309	chr9	56784719	56785271
ELK1-Dam_310	chr12	36884060	36884695
ELK1-Dam_311	chr8	34764932	34765956
ELK1-Dam_312	chr1	36602497	36602817
ELK1-Dam_313	chr19	5636391	5637043
ELK1-Dam_314	chr6	70742387	70743052
ELK1-Dam_315	chr13	105017681	105018627
ELK1-Dam_316	chr11	77929446	77930119
ELK1-Dam_317	chr5	125871841	125872497
ELK1-Dam_318	chr2	156050059	156050647
ELK1-Dam_319	chr1	84836104	84836552
ELK1-Dam_320	chr19	4792799	4794062
ELK1-Dam_321	chr2	26762413	26762913
ELK1-Dam_322	chr8	125090846	125091652
ELK1-Dam_323	chr8	23970748	23971678
ELK1-Dam_324	chr9	20781203	20781621
ELK1-Dam_325	chr12	3887981	3889429
ELK1-Dam_326	chr1	135028523	135030337
ELK1-Dam_327	chr7	148642282	148642931
ELK1-Dam_328	chr4	126921266	126922050
ELK1-Dam_329	chr9	108471195	108472056
ELK1-Dam_330	chr12	113832228	113833223
ELK1-Dam_331	chr3	108059275	108060294
ELK1-Dam_332	chr16	91367101	91367838
ELK1-Dam_333	chr16	90142617	90142992
ELK1-Dam_334	chr4	155385533	155386142
ELK1-Dam_335	chr3	87422029	87422847
ELK1-Dam_336	chr8	67169344	67170096
ELK1-Dam_337	chr17	87151987	87152412
ELK1-Dam_338	chr12	114103685	114105092
ELK1-Dam_339	chr17	56427706	56428007
ELK1-Dam_340	chrX	137490585	137491626
ELK1-Dam_341	chr7	28623355	28624802
ELK1-Dam_342	chr11	77992729	77993589
ELK1-Dam_343	chr11	68908271	68908989
ELK1-Dam_344	chr10	61710365	61711387
ELK1-Dam_345	chr17	46289396	46290381
ELK1-Dam_346	chr7	116868666	116869961
ELK1-Dam_347	chr3	95975995	95976294
ELK1-Dam_348	chr10	68673691	68674197
ELK1-Dam_349	chr8	107846414	107847234
ELK1-Dam_350	chr5	53658440	53659533
ELK1-Dam_351	chr4	155040336	155041421
ELK1-Dam_352	chr5	38953316	38953930
ELK1-Dam_353	chr1	173258575	173259110
ELK1-Dam_354	chr9	69136760	69137263
ELK1-Dam_355	chr8	75877601	75878456
ELK1-Dam_356	chr8	127473712	127474213
ELK1-Dam_357	chr15	72977678	72978967
ELK1-Dam_358	chr2	167458391	167459839
ELK1-Dam_359	chr17	35336467	35337902
ELK1-Dam_360	chr15	98559076	98559676
ELK1-Dam_361	chr11	65619877	65620529
ELK1-Dam_362	chr2	128954481	128955166
ELK1-Dam_363	chr4	138986049	138986772
ELK1-Dam_364	chr15	74505790	74506374
ELK1-Dam_365	chr12	114313445	114314290
ELK1-Dam_366	chr12	85626218	85627374
ELK1-Dam_367	chr5	121899062	121899600
ELK1-Dam_368	chr2	25038514	25039014
ELK1-Dam_369	chr3	145539047	145539856
ELK1-Dam_370	chr6	29297675	29298224
ELK1-Dam_371	chr10	80390893	80391560
ELK1-Dam_372	chr15	80217226	80217550
ELK1-Dam_373	chr15	36721399	36722372
ELK1-Dam_374	chr3	88382875	88383506
ELK1-Dam_375	chr5	137730475	137731047
ELK1-Dam_376	chr7	146438112	146438627
ELK1-Dam_377	chr4	155204164	155205777
ELK1-Dam_378	chr19	3707706	3708035
ELK1-Dam_379	chr15	76455617	76456553
ELK1-Dam_380	chr8	23916168	23918164
ELK1-Dam_381	chr11	120578403	120579624
ELK1-Dam_382	chr9	41930551	41931767
ELK1-Dam_383	chr7	52254594	52255449
ELK1-Dam_384	chr11	22742463	22743142
ELK1-Dam_385	chr19	38128504	38129077
ELK1-Dam_386	chr5	137728541	137729078
ELK1-Dam_387	chr1	137616250	137616783
ELK1-Dam_388	chr2	181113217	181114193
ELK1-Dam_389	chr1	63161228	63163501
ELK1-Dam_390	chr11	70376960	70377914
ELK1-Dam_391	chr5	34531400	34532283
ELK1-Dam_392	chr16	31080240	31080756
ELK1-Dam_393	chr8	86132786	86133277
ELK1-Dam_394	chr19	53526894	53527421
ELK1-Dam_395	chr17	26580954	26581615
ELK1-Dam_396	chr4	57578343	57579456
ELK1-Dam_397	chr3	130417903	130418301
ELK1-Dam_398	chr8	4779153	4779643
ELK1-Dam_399	chr4	154385279	154386308
ELK1-Dam_400	chr17	34092482	34093286
ELK1-Dam_401	chr1	184447984	184448532
ELK1-Dam_402	chr3	88425859	88426370
ELK1-Dam_403	chr16	91378150	91378964
ELK1-Dam_404	chr4	118293495	118294149
ELK1-Dam_405	chr1	55082900	55083624
ELK1-Dam_406	chr8	47635570	47636886
ELK1-Dam_407	chr9	35006764	35007301
ELK1-Dam_408	chr5	64552740	64553479
ELK1-Dam_409	chr8	67471533	67472600
ELK1-Dam_410	chr8	124943680	124943954
ELK1-Dam_411	chr7	54100485	54100801
ELK1-Dam_412	chr5	38954375	38954749
ELK1-Dam_413	chr18	37965333	37965772
ELK1-Dam_414	chr19	3911928	3913180
ELK1-Dam_415	chr17	15700936	15701931
ELK1-Dam_416	chr4	125779607	125780996
ELK1-Dam_417	chr4	129784455	129785067
ELK1-Dam_418	chr15	78254640	78255142
ELK1-Dam_419	chr1	193816397	193816914
ELK1-Dam_420	chr6	116286531	116287189
ELK1-Dam_421	chr5	123517393	123517956
ELK1-Dam_422	chr6	117866302	117867019
ELK1-Dam_423	chr11	51428764	51429627
ELK1-Dam_424	chr15	78003436	78003714
ELK1-Dam_425	chr17	46690628	46691902
ELK1-Dam_426	chr3	88128976	88129637
ELK1-Dam_427	chr11	29071919	29072829
ELK1-Dam_428	chr1	133904976	133906049
ELK1-Dam_429	chr5	31497900	31498373
ELK1-Dam_430	chr9	110207728	110208171
ELK1-Dam_431	chr1	173224779	173225758
ELK1-Dam_432	chr19	8971878	8972881
ELK1-Dam_433	chr17	34740590	34741712
ELK1-Dam_434	chr14	32150353	32151089
ELK1-Dam_435	chr7	133630436	133631047
ELK1-Dam_436	chr1	134175902	134176621
ELK1-Dam_437	chr11	101441161	101442233
ELK1-Dam_438	chr6	145158580	145159129
ELK1-Dam_439	chr3	88356323	88356959
ELK1-Dam_440	chr7	36430906	36431900
ELK1-Dam_441	chr13	14131705	14132227
ELK1-Dam_442	chr7	117128883	117130337
ELK1-Dam_443	chr16	4003811	4004572
ELK1-Dam_444	chr11	75300663	75301362
ELK1-Dam_445	chr9	56978035	56978527
ELK1-Dam_446	chr8	106772542	106773220
ELK1-Dam_447	chr6	67215845	67216775
ELK1-Dam_448	chr3	94463307	94463628
ELK1-Dam_449	chr12	41173614	41175492
ELK1-Dam_450	chr1	120218855	120219909
ELK1-Dam_451	chr7	109414684	109415500
ELK1-Dam_452	chr2	34987492	34988284
ELK1-Dam_453	chr12	112616849	112617298
ELK1-Dam_454	chr8	23510107	23510537
ELK1-Dam_455	chr4	40089825	40090084
ELK1-Dam_456	chr7	19895294	19895883
ELK1-Dam_457	chr12	56180590	56181231
ELK1-Dam_458	chr1	173433370	173434321
ELK1-Dam_459	chr4	132195509	132195893
ELK1-Dam_460	chr14	71033767	71034258
ELK1-Dam_461	chr7	53459309	53460014
ELK1-Dam_462	chr11	59778188	59779223
ELK1-Dam_463	chr19	5491885	5492312
ELK1-Dam_464	chr4	147532611	147533060
ELK1-Dam_465	chr11	60692673	60693007
ELK1-Dam_466	chr11	118115373	118115624
ELK1-Dam_467	chr6	5334740	5335263
ELK1-Dam_468	chr6	114859016	114859500
ELK1-Dam_469	chr15	76702351	76702820
ELK1-Dam_470	chr7	19929242	19930310
ELK1-Dam_471	chr3	87970258	87970706
ELK1-Dam_472	chr1	182500201	182500942
ELK1-Dam_473	chr11	68884827	68886006
ELK1-Dam_474	chr8	128189762	128190830
ELK1-Dam_475	chr3	94846471	94847473
ELK1-Dam_476	chr8	120197125	120197515
ELK1-Dam_477	chr11	94870736	94871200
ELK1-Dam_478	chr5	88982711	88983238
ELK1-Dam_479	chr17	56397823	56398707
ELK1-Dam_480	chr17	47824412	47824996
ELK1-Dam_481	chr3	127491948	127492513
ELK1-Dam_482	chr11	79100350	79101319
ELK1-Dam_483	chr4	131701108	131701400
ELK1-Dam_484	chr3	95986344	95986878
ELK1-Dam_485	chr4	133958536	133959406
ELK1-Dam_486	chr5	135662483	135663166
ELK1-Dam_487	chr8	4239237	4240299
ELK1-Dam_488	chr1	136390378	136391258
ELK1-Dam_489	chr2	151902222	151903368
ELK1-Dam_490	chr6	125081529	125082145
ELK1-Dam_491	chr14	104920742	104921284
ELK1-Dam_492	chr13	53077691	53078590
ELK1-Dam_493	chr18	62112949	62113533
ELK1-Dam_494	chr11	60540984	60541767
ELK1-Dam_495	chr4	123395484	123395728
ELK1-Dam_496	chr19	3999364	4000363
ELK1-Dam_497	chr8	11558647	11560004
ELK1-Dam_498	chr4	131631851	131632534
ELK1-Dam_499	chr4	133312221	133312932
ELK1-Dam_500	chr19	3846641	3847717
ELK1-Dam_501	chr9	21960333	21961139
ELK1-Dam_502	chr3	90034936	90035372
ELK1-Dam_503	chr14	32898100	32899844
ELK1-Dam_504	chr13	67407283	67407656
ELK1-Dam_505	chr7	29594884	29595564
ELK1-Dam_506	chr7	4497871	4498588
ELK1-Dam_507	chr5	125921214	125921471
ELK1-Dam_508	chr19	3324816	3325301
ELK1-Dam_509	chr17	13108304	13109064
ELK1-Dam_510	chr7	87376043	87376927
ELK1-Dam_511	chr7	28515843	28516126
ELK1-Dam_512	chrX	71515263	71516093
ELK1-Dam_513	chr3	79645276	79646125
ELK1-Dam_514	chr1	74169723	74170187
ELK1-Dam_515	chr18	43554142	43554684
ELK1-Dam_516	chr17	24872599	24873400
ELK1-Dam_517	chr5	125956445	125957201
ELK1-Dam_518	chr11	94515061	94515351
ELK1-Dam_519	chr9	119469310	119469619
ELK1-Dam_520	chr16	91373885	91374694
ELK1-Dam_521	chr2	131181780	131182030
ELK1-Dam_522	chr13	21544662	21545610
ELK1-Dam_523	chr5	118694347	118694933
ELK1-Dam_524	chr11	69651719	69652125
ELK1-Dam_525	chr2	181413754	181414396
ELK1-Dam_526	chr7	17366547	17367051
ELK1-Dam_527	chr8	11551664	11552352
ELK1-Dam_528	chr6	18799041	18799836
ELK1-Dam_529	chr5	64547284	64548394
ELK1-Dam_530	chr17	26649677	26650385
ELK1-Dam_531	chr8	32222470	32223524
ELK1-Dam_532	chr2	113688578	113689096
ELK1-Dam_533	chr14	26512007	26513241
ELK1-Dam_534	chr8	97399188	97399920
ELK1-Dam_535	chr2	155417210	155417847
ELK1-Dam_536	chr17	36109167	36110143
ELK1-Dam_537	chr14	47690348	47690787
ELK1-Dam_538	chr4	108506960	108507176
ELK1-Dam_539	chr2	122454505	122455035
ELK1-Dam_540	chr11	45757336	45757768
ELK1-Dam_541	chr11	94869103	94870070
ELK1-Dam_542	chr7	38803404	38803933
ELK1-Dam_543	chr11	69808491	69809078
ELK1-Dam_544	chr19	36909997	36910536
ELK1-Dam_545	chr2	174297726	174298164
ELK1-Dam_546	chr9	18096690	18097396
ELK1-Dam_547	chr12	86814673	86815365
ELK1-Dam_548	chr5	31252486	31253102
ELK1-Dam_549	chr7	52252241	52254026
ELK1-Dam_550	chr19	10270847	10271383
ELK1-Dam_551	chr8	86479054	86479723
ELK1-Dam_552	chr15	31154581	31155303
ELK1-Dam_553	chr1	137620734	137621198
ELK1-Dam_554	chr15	5058081	5058786
ELK1-Dam_555	chr15	79239137	79239479
ELK1-Dam_556	chr9	20782974	20783377
ELK1-Dam_557	chr5	114221915	114222472
ELK1-Dam_558	chr17	56322499	56323088
ELK1-Dam_559	chr4	116795740	116796159
ELK1-Dam_560	chr2	17959070	17959504
ELK1-Dam_561	chr4	132925469	132926308
ELK1-Dam_562	chr2	121282452	121282809
ELK1-Dam_563	chr9	57610781	57612101
ELK1-Dam_564	chr2	84667139	84667706
ELK1-Dam_565	chr9	108361935	108362599
ELK1-Dam_566	chr17	24388503	24389413
ELK1-Dam_567	chr2	173486160	173487006
ELK1-Dam_568	chr14	55044649	55046142
ELK1-Dam_569	chr7	87414810	87415464
ELK1-Dam_570	chr7	54262782	54263641
ELK1-Dam_571	chr10	43867450	43868027
ELK1-Dam_572	chr17	33083823	33084734
ELK1-Dam_573	chr2	167249378	167249673
ELK1-Dam_574	chr11	43564700	43565119
ELK1-Dam_575	chr11	98847151	98847788
ELK1-Dam_576	chr2	180188487	180189839
ELK1-Dam_577	chr18	32298876	32299444
ELK1-Dam_578	chr11	96849423	96850057
ELK1-Dam_579	chr5	145964640	145966277
ELK1-Dam_580	chr9	106339216	106340486
ELK1-Dam_581	chr10	12682992	12683768
ELK1-Dam_582	chr1	173084369	173084818
ELK1-Dam_583	chr9	35019211	35019913
ELK1-Dam_584	chr2	150188218	150189155
ELK1-Dam_585	chr10	18127137	18127776
ELK1-Dam_586	chr1	82720756	82721289
ELK1-Dam_587	chr3	137729531	137730905
ELK1-Dam_588	chr7	106500856	106501494
ELK1-Dam_589	chr3	87651369	87651830
ELK1-Dam_590	chr8	4259865	4260125
ELK1-Dam_591	chr4	48055173	48055544
ELK1-Dam_592	chr8	49077580	49078128
ELK1-Dam_593	chr4	106977278	106977611
ELK1-Dam_594	chr10	79817209	79817909
ELK1-Dam_595	chr5	112753461	112753917
ELK1-Dam_596	chr8	126002204	126002864
ELK1-Dam_597	chr1	189039012	189039412
ELK1-Dam_598	chr9	110559377	110560393
ELK1-Dam_599	chr18	75977212	75977994
ELK1-Dam_600	chr7	106504107	106505703
ELK1-Dam_601	chr11	88717496	88718567
ELK1-Dam_602	chr5	120566292	120566594
ELK1-Dam_603	chr11	62634869	62635338
ELK1-Dam_604	chr11	77327211	77327769
ELK1-Dam_605	chr8	97126309	97126690
ELK1-Dam_606	chr2	62484258	62484659
ELK1-Dam_607	chr13	59769977	59770700
ELK1-Dam_608	chr11	98492155	98492633
ELK1-Dam_609	chr6	120481910	120482335
ELK1-Dam_610	chr10	80505553	80505964
ELK1-Dam_611	chr4	122562644	122564486
ELK1-Dam_612	chr10	60914209	60914628
ELK1-Dam_613	chr13	99263824	99264184
ELK1-Dam_614	chr1	95698171	95699097
ELK1-Dam_615	chr19	23218591	23219517
ELK1-Dam_616	chr11	120042955	120043573
ELK1-Dam_617	chr19	53604679	53605390
ELK1-Dam_618	chr6	30520312	30520847
ELK1-Dam_619	chr10	79314348	79315121
ELK1-Dam_620	chr7	147236185	147236739
ELK1-Dam_621	chr19	6398969	6399367
ELK1-Dam_622	chr5	143668183	143668923
ELK1-Dam_623	chr14	26526542	26527086
ELK1-Dam_624	chr9	45761713	45762327
ELK1-Dam_625	chr12	80272477	80273030
ELK1-Dam_626	chr7	51809180	51809679
ELK1-Dam_627	chr7	133934190	133934727
ELK1-Dam_628	chr2	84489953	84490633
ELK1-Dam_629	chr7	134040959	134041387
ELK1-Dam_630	chr17	25151463	25152244
ELK1-Dam_631	chr7	133935061	133935508
ELK1-Dam_632	chr11	43247089	43247620
ELK1-Dam_633	chr16	4881152	4881641
ELK1-Dam_634	chr3	115709471	115709870
ELK1-Dam_635	chr15	97082992	97083460
ELK1-Dam_636	chr10	127530570	127531444
ELK1-Dam_637	chr10	83994939	83995548
ELK1-Dam_638	chr14	31439761	31440451
ELK1-Dam_639	chr5	149210072	149210526
ELK1-Dam_640	chr14	57194659	57195031
ELK1-Dam_641	chr2	150574078	150574623
ELK1-Dam_642	chr7	134041954	134042485
ELK1-Dam_643	chr7	17367784	17369097
ELK1-Dam_644	chr11	62271682	62272496
ELK1-Dam_645	chr11	68854392	68855294
ELK1-Dam_646	chr2	164572300	164572617
ELK1-Dam_647	chr2	164705526	164705773
ELK1-Dam_648	chr1	174012863	174013640
ELK1-Dam_649	chr11	60745985	60746568
ELK1-Dam_650	chr7	4783153	4783857
ELK1-Dam_651	chr19	46412666	46413128
ELK1-Dam_652	chr18	12463365	12463824
ELK1-Dam_653	chr11	78324997	78325500
ELK1-Dam_654	chr4	119963240	119964227
ELK1-Dam_655	chr5	34525456	34526100
ELK1-Dam_656	chr14	76157997	76158539
ELK1-Dam_657	chr6	127404446	127404998
ELK1-Dam_658	chr17	24584758	24586254
ELK1-Dam_659	chr3	90319733	90320190
ELK1-Dam_660	chr6	124759833	124760855
ELK1-Dam_661	chr9	106152193	106152659
ELK1-Dam_662	chr16	4727040	4727453
ELK1-Dam_663	chr5	138558043	138558588
ELK1-Dam_664	chr6	145160266	145161948
ELK1-Dam_665	chr10	90586915	90587315
ELK1-Dam_666	chr6	115946869	115947663
ELK1-Dam_667	chr18	70693163	70693879
ELK1-Dam_668	chr15	83002559	83003521
ELK1-Dam_669	chr8	27267926	27268498
ELK1-Dam_670	chr4	40670189	40670719
ELK1-Dam_671	chr6	7795706	7797251
ELK1-Dam_672	chr3	95698363	95698725
ELK1-Dam_673	chr14	12384000	12384761
ELK1-Dam_674	chr11	67733949	67734391
ELK1-Dam_675	chr5	134570855	134571197
ELK1-Dam_676	chr8	72148518	72149025
ELK1-Dam_677	chr16	59403624	59403942
ELK1-Dam_678	chr10	120910936	120912299
ELK1-Dam_679	chr4	32047183	32049140
ELK1-Dam_680	chr4	138747744	138748262
ELK1-Dam_681	chr2	126895618	126896084
ELK1-Dam_682	chr9	21091022	21091685
ELK1-Dam_683	chr6	85401725	85402140
ELK1-Dam_684	chr7	29096118	29096495
ELK1-Dam_685	chr14	73382955	73384168
ELK1-Dam_686	chr5	115750296	115750613
ELK1-Dam_687	chr2	179776115	179776521
ELK1-Dam_688	chr3	104666194	104667359
ELK1-Dam_689	chr15	79570905	79571475
ELK1-Dam_690	chr11	117684039	117684506
ELK1-Dam_691	chr8	35187451	35187878
ELK1-Dam_692	chr16	13668592	13669299
ELK1-Dam_693	chr17	45708865	45709355
ELK1-Dam_694	chr12	9037237	9037708
ELK1-Dam_695	chr9	44075240	44075886
ELK1-Dam_696	chr9	121550351	121550775
ELK1-Dam_697	chr6	73010008	73010480
ELK1-Dam_698	chr17	80606973	80607519
ELK1-Dam_699	chr7	80885979	80886897
ELK1-Dam_700	chr1	153971755	153972035
ELK1-Dam_701	chr15	98436907	98437200
ELK1-Dam_702	chr12	113853508	113854482
ELK1-Dam_703	chr19	46378446	46379063
ELK1-Dam_704	chr4	43571002	43571660
ELK1-Dam_705	chr15	99362299	99362701
ELK1-Dam_706	chr3	116669691	116670717
ELK1-Dam_707	chr11	5689080	5689553
ELK1-Dam_708	chr9	57005404	57006036
ELK1-Dam_709	chr4	133561484	133562378
ELK1-Dam_710	chr11	35652217	35653378
ELK1-Dam_711	chr7	117763011	117763384
ELK1-Dam_712	chr9	102984383	102984885
ELK1-Dam_713	chr9	119232261	119232625
ELK1-Dam_714	chr1	178748365	178748913
ELK1-Dam_715	chr7	31347458	31347752
ELK1-Dam_716	chr17	37087665	37088175
ELK1-Dam_717	chr11	88922489	88923407
ELK1-Dam_718	chr7	52256372	52257054
ELK1-Dam_719	chr4	147312026	147312531
ELK1-Dam_720	chr18	38456819	38457460
ELK1-Dam_721	chr12	114180733	114181301
ELK1-Dam_722	chr11	51420554	51420918
ELK1-Dam_723	chr6	42215384	42216244
ELK1-Dam_724	chr9	61762328	61762763
ELK1-Dam_725	chr11	101969731	101970663
ELK1-Dam_726	chr1	38054094	38054495
ELK1-Dam_727	chr4	120338737	120339178
ELK1-Dam_728	chr11	115874412	115874831
ELK1-Dam_729	chr3	95085963	95086603
ELK1-Dam_730	chr5	93033924	93034539
ELK1-Dam_731	chr2	146682045	146682496
ELK1-Dam_732	chr6	39370500	39370746
ELK1-Dam_733	chr17	23736394	23736810
ELK1-Dam_734	chr14	55583700	55584586
ELK1-Dam_735	chr9	110957667	110958334
ELK1-Dam_736	chr15	57966763	57967179
ELK1-Dam_737	chr15	99603492	99603819
ELK1-Dam_738	chr8	124352478	124353038
ELK1-Dam_739	chr7	117912989	117913896
ELK1-Dam_740	chr17	34260176	34261079
ELK1-Dam_741	chr3	95031265	95031723
ELK1-Dam_742	chr1	92847126	92848656
ELK1-Dam_743	chr1	74177445	74178409
ELK1-Dam_744	chr11	102747558	102748082
ELK1-Dam_745	chr14	55723741	55724502
ELK1-Dam_746	chr4	151527016	151527583
ELK1-Dam_747	chr15	91503993	91504617
ELK1-Dam_748	chr9	66192655	66193230
ELK1-Dam_749	chr11	40505351	40505708
ELK1-Dam_750	chr2	180444275	180444707
ELK1-Dam_751	chr6	116148918	116149943
ELK1-Dam_752	chr1	153603231	153604109
ELK1-Dam_753	chr4	141179877	141180373
ELK1-Dam_754	chr11	55273324	55274204
ELK1-Dam_755	chr2	27370137	27370668
ELK1-Dam_756	chr19	43596669	43597400
ELK1-Dam_757	chr4	43010863	43011328
ELK1-Dam_758	chr5	116294753	116295095
ELK1-Dam_759	chr11	107407262	107407662
ELK1-Dam_760	chr4	138434871	138435214
ELK1-Dam_761	chr11	94854171	94855091
ELK1-Dam_762	chr18	31947903	31948276
ELK1-Dam_763	chr4	57314187	57314771
ELK1-Dam_764	chr7	20250481	20251223
ELK1-Dam_765	chr3	120995947	120996454
ELK1-Dam_766	chr11	69394586	69395294
ELK1-Dam_767	chr10	78057916	78058356
ELK1-Dam_768	chr5	35867036	35867588
ELK1-Dam_769	chr17	34261697	34262024
ELK1-Dam_770	chr2	58420266	58420593
ELK1-Dam_771	chr13	112597420	112597981
ELK1-Dam_772	chr12	83267384	83267981
ELK1-Dam_773	chr8	13197686	13197976
ELK1-Dam_774	chr5	35002523	35002900
ELK1-Dam_775	chr6	114871159	114871547
ELK1-Dam_776	chr2	132074010	132074360
ELK1-Dam_777	chr15	101091328	101091906
ELK1-Dam_778	chr8	74086026	74086613
ELK1-Dam_779	chr9	107482628	107483228
ELK1-Dam_780	chr11	5855959	5856250
ELK1-Dam_781	chr4	129601469	129601868
ELK1-Dam_782	chr7	28126544	28127287
ELK1-Dam_783	chr2	160558312	160559974
ELK1-Dam_784	chr11	76891984	76892514
ELK1-Dam_785	chr17	72130302	72131515
ELK1-Dam_786	chr3	36761343	36761749
ELK1-Dam_787	chr9	88332349	88333031
ELK1-Dam_788	chr7	88356848	88357461
ELK1-Dam_789	chr6	136757293	136757689
ELK1-Dam_790	chr11	72861844	72862861
ELK1-Dam_791	chr17	56218363	56218763
ELK1-Dam_792	chr8	73197202	73197865
ELK1-Dam_793	chr11	77307824	77308303
ELK1-Dam_794	chr12	83358784	83359494
ELK1-Dam_795	chr4	129109832	129110423
ELK1-Dam_796	chr12	106795395	106796179
ELK1-Dam_797	chr2	156544079	156544763
ELK1-Dam_798	chr5	135539415	135540096
ELK1-Dam_799	chr8	87300011	87300494
ELK1-Dam_800	chr2	167485935	167486378
ELK1-Dam_801	chr11	68859356	68859958
ELK1-Dam_802	chr17	24808723	24809171
ELK1-Dam_803	chr2	91489683	91492180
ELK1-Dam_804	chr2	164647923	164648657
ELK1-Dam_805	chr9	43052327	43053009
ELK1-Dam_806	chr7	74517729	74518048
ELK1-Dam_807	chr15	76729665	76731182
ELK1-Dam_808	chr18	35018726	35019262
ELK1-Dam_809	chr10	70702162	70702976
ELK1-Dam_810	chr5	140895938	140896447
ELK1-Dam_811	chr1	140859676	140860005
ELK1-Dam_812	chr12	3426254	3426605
ELK1-Dam_813	chr7	119896927	119897426
ELK1-Dam_814	chr6	8159712	8160836
ELK1-Dam_815	chr18	84757479	84758063
ELK1-Dam_816	chr4	129853687	129854224
ELK1-Dam_817	chr13	31892529	31892973
ELK1-Dam_818	chr15	76501046	76501412
ELK1-Dam_819	chr19	7069446	7070278
ELK1-Dam_820	chr11	101304101	101304649
ELK1-Dam_821	chr17	47147819	47148219
ELK1-Dam_822	chr10	117230070	117230585
ELK1-Dam_823	chr5	123586018	123587119
ELK1-Dam_824	chr9	56924962	56925240
ELK1-Dam_825	chr17	57171382	57172026
ELK1-Dam_826	chr3	97456162	97456492
ELK1-Dam_827	chr8	119468987	119469761
ELK1-Dam_828	chr5	138627318	138628024
ELK1-Dam_829	chr4	40216287	40217483
ELK1-Dam_830	chr9	106723371	106723917
ELK1-Dam_831	chr19	10278449	10279806
ELK1-Dam_832	chr4	131858173	131858605
ELK1-Dam_833	chr1	94544125	94544763
ELK1-Dam_834	chr5	130732427	130733154
ELK1-Dam_835	chr3	89074140	89075192
ELK1-Dam_836	chr7	135380856	135381158
ELK1-Dam_837	chr18	77302881	77303327
ELK1-Dam_838	chr9	65425777	65426489
ELK1-Dam_839	chr5	137520897	137521578
ELK1-Dam_840	chr11	59780661	59781600
ELK1-Dam_841	chr1	53369700	53370203
ELK1-Dam_842	chr1	33725521	33726216
ELK1-Dam_843	chr11	29447981	29448733
ELK1-Dam_844	chr6	42643160	42643963
ELK1-Dam_845	chr6	29413239	29414444
ELK1-Dam_846	chr2	179849364	179850219
ELK1-Dam_847	chr8	42502244	42502669
ELK1-Dam_848	chr6	82723542	82723977
ELK1-Dam_849	chr1	173177349	173178242
ELK1-Dam_850	chr6	50515465	50516050
ELK1-Dam_851	chr2	93304193	93304573
ELK1-Dam_852	chr18	34697785	34698409
ELK1-Dam_853	chr15	102503746	102504532
ELK1-Dam_854	chr15	51697306	51697892
ELK1-Dam_855	chr1	58501931	58502905
ELK1-Dam_856	chr7	148041631	148042656
ELK1-Dam_857	chr2	29820073	29820618
ELK1-Dam_858	chr11	55283807	55284508
ELK1-Dam_859	chr4	140544428	140544819
ELK1-Dam_860	chr11	53286542	53286892
ELK1-Dam_861	chr8	13756999	13757427
ELK1-Dam_862	chr5	135645604	135646047
ELK1-Dam_863	chr15	32344395	32345194
ELK1-Dam_864	chr7	30553487	30553867
ELK1-Dam_865	chr2	172800822	172801232
ELK1-Dam_866	chr16	28752414	28752892
ELK1-Dam_867	chr19	42688506	42688981
ELK1-Dam_868	chr1	136916981	136917505
ELK1-Dam_869	chr4	123020639	123021271
ELK1-Dam_870	chr4	135613646	135613996
ELK1-Dam_871	chr19	41282766	41283573
ELK1-Dam_872	chr4	132070908	132071702
ELK1-Dam_873	chr9	77759204	77760184
ELK1-Dam_874	chr10	68991862	68992484
ELK1-Dam_875	chr4	117503452	117504407
ELK1-Dam_876	chr5	136437393	136437849
ELK1-Dam_877	chr5	24190987	24191378
ELK1-Dam_878	chr4	132817100	132817387
ELK1-Dam_879	chr9	79809285	79809680
ELK1-Dam_880	chr13	114451361	114452004
ELK1-Dam_881	chr8	15058923	15059263
ELK1-Dam_882	chr14	32008082	32008875
ELK1-Dam_883	chr8	107787887	107788281
ELK1-Dam_884	chr17	15635385	15636496
ELK1-Dam_885	chr17	49567447	49568606
ELK1-Dam_886	chr9	107579445	107579976
ELK1-Dam_887	chr10	77472734	77473461
ELK1-Dam_888	chr14	22665471	22666400
ELK1-Dam_889	chr14	21167982	21168411
ELK1-Dam_890	chr1	154470318	154471479
ELK1-Dam_891	chr4	58926107	58926576
ELK1-Dam_892	chr19	5731650	5732194
ELK1-Dam_893	chr11	53914981	53915427
ELK1-Dam_894	chr17	23810359	23810744
ELK1-Dam_895	chr15	81789542	81789859
ELK1-Dam_896	chr11	97642642	97643522
ELK1-Dam_897	chr13	58460770	58461055
ELK1-Dam_898	chr3	88297578	88299831
ELK1-Dam_899	chr12	87423156	87424193
ELK1-Dam_900	chr6	29298540	29299598
ELK1-Dam_901	chr8	124942967	124943321
ELK1-Dam_902	chr9	20455795	20456617
ELK1-Dam_903	chr1	177420437	177420769
ELK1-Dam_904	chr12	72213884	72214586
ELK1-Dam_905	chr18	32195555	32196036
ELK1-Dam_906	chr18	84759452	84760009
ELK1-Dam_907	chr8	107850118	107850513
ELK1-Dam_908	chr8	109619160	109619864
ELK1-Dam_909	chr11	96902497	96902886
ELK1-Dam_910	chr9	106062586	106062988
ELK1-Dam_911	chr9	35070646	35071070
ELK1-Dam_912	chr2	112333975	112334286
ELK1-Dam_913	chr14	70472958	70474223
ELK1-Dam_914	chr6	85853612	85855121
ELK1-Dam_915	chr1	92865342	92865897
ELK1-Dam_916	chr5	24106450	24106886
ELK1-Dam_917	chr14	54880993	54881279
ELK1-Dam_918	chrX	34184290	34184618
ELK1-Dam_919	chr11	97702244	97703482
ELK1-Dam_920	chr5	31482339	31483057
ELK1-Dam_921	chr2	122455382	122456189
ELK1-Dam_922	chr17	31011315	31011820
ELK1-Dam_923	chr9	54228234	54228788
ELK1-Dam_924	chr5	20388106	20388531
ELK1-Dam_925	chr19	15999013	15999460
ELK1-Dam_926	chr19	57433141	57434514
ELK1-Dam_927	chr9	44215494	44215747
ELK1-Dam_928	chr19	34329127	34329452
ELK1-Dam_929	chr14	55261997	55262623
ELK1-Dam_930	chr17	27701703	27702347
ELK1-Dam_931	chr15	89006424	89007162
ELK1-Dam_932	chr9	7183411	7184237
ELK1-Dam_933	chr9	20297512	20298041
ELK1-Dam_934	chr19	46745360	46745811
ELK1-Dam_935	chr11	115264861	115265223
ELK1-Dam_936	chr2	119980471	119980832
ELK1-Dam_937	chr19	46752930	46753501
ELK1-Dam_938	chr11	105452604	105453110
ELK1-Dam_939	chr1	181481137	181481716
ELK1-Dam_940	chr4	140633985	140634369
ELK1-Dam_941	chr17	5977386	5978202
ELK1-Dam_942	chr4	132687485	132688520
ELK1-Dam_943	chr3	108003735	108004130
ELK1-Dam_944	chr13	17786883	17787219
ELK1-Dam_945	chr16	15863356	15863852
ELK1-Dam_946	chr4	133812743	133813111
ELK1-Dam_947	chr2	91027688	91027971
ELK1-Dam_948	chr7	4462426	4462878
ELK1-Dam_949	chr17	25170599	25171546
ELK1-Dam_950	chr11	79775913	79776367
ELK1-Dam_951	chrX	34404070	34404636
ELK1-Dam_952	chr16	21945966	21946892
ELK1-Dam_953	chr7	28955272	28956130
ELK1-Dam_954	chr4	151234588	151234947
ELK1-Dam_955	chr6	13820908	13821381
ELK1-Dam_956	chr10	60936734	60937095
ELK1-Dam_957	chr13	12561738	12562217
ELK1-Dam_958	chr5	121063266	121063615
ELK1-Dam_959	chr17	24552051	24552548
ELK1-Dam_960	chr6	119851842	119852264
ELK1-Dam_961	chr4	134470340	134470625
ELK1-Dam_962	chr15	81701934	81702429
ELK1-Dam_963	chr4	147241476	147242021
ELK1-Dam_964	chr2	26770849	26771573
ELK1-Dam_965	chr17	66232568	66233138
ELK1-Dam_966	chr4	151528325	151528930
ELK1-Dam_967	chr15	102128513	102129250
ELK1-Dam_968	chr16	18879249	18879854
ELK1-Dam_969	chr4	129726882	129727606
ELK1-Dam_970	chr7	89077789	89078262
ELK1-Dam_971	chr19	59418116	59418811
ELK1-Dam_972	chr8	97429251	97429960
ELK1-Dam_973	chr11	60644568	60645023
ELK1-Dam_974	chr5	31496223	31496659
ELK1-Dam_975	chr4	123428170	123428570
ELK1-Dam_976	chr6	71581454	71581790
ELK1-Dam_977	chr2	90743414	90744736
ELK1-Dam_978	chr15	103090430	103090855
ELK1-Dam_979	chr16	14158855	14159122
ELK1-Dam_980	chr4	41081628	41082158
ELK1-Dam_981	chr17	79133993	79135157
ELK1-Dam_982	chr1	196803088	196804154
ELK1-Dam_983	chr5	143988308	143988671
ELK1-Dam_984	chr11	77979704	77980162
ELK1-Dam_985	chr15	78870463	78870891
ELK1-Dam_986	chr4	14790667	14790997
ELK1-Dam_987	chr2	116948499	116948848
ELK1-Dam_988	chr13	102536555	102537130
ELK1-Dam_989	chr8	73288813	73289066
ELK1-Dam_990	chr17	35379821	35380510
ELK1-Dam_991	chr15	99305192	99305795
ELK1-Dam_992	chr10	34002585	34003006
ELK1-Dam_993	chr3	57649787	57650653
ELK1-Dam_994	chr4	41410805	41411808
ELK1-Dam_995	chr17	31993327	31994280
ELK1-Dam_996	chr9	122932183	122932540
ELK1-Dam_997	chr8	124431796	124432715
ELK1-Dam_998	chr10	128185181	128185579
ELK1-Dam_999	chr1	75389324	75389688
ELK1-Dam_1000	chr10	77888015	77888333
ELK1-Dam_1001	chr9	107853575	107854000
ELK1-Dam_1002	chr18	24280479	24280987
ELK1-Dam_1003	chr2	25080233	25080563
ELK1-Dam_1004	chr6	87837323	87837643
ELK1-Dam_1005	chr16	17508750	17509358
ELK1-Dam_1006	chr18	61713914	61714211
ELK1-Dam_1007	chr4	141637404	141638974
ELK1-Dam_1008	chr7	31344495	31345450
ELK1-Dam_1009	chr2	154048605	154049110
ELK1-Dam_1010	chr17	34088408	34089106
ELK1-Dam_1011	chr14	30780835	30782187
ELK1-Dam_1012	chr6	8900782	8901274
ELK1-Dam_1013	chr9	107775564	107775868
ELK1-Dam_1014	chr11	60623561	60624410
ELK1-Dam_1015	chr1	195088563	195089928
ELK1-Dam_1016	chr4	83064161	83065047
ELK1-Dam_1017	chr17	5838187	5838666
ELK1-Dam_1018	chr11	69486189	69486603
ELK1-Dam_1019	chr6	51961785	51962099
ELK1-Dam_1020	chr2	21126711	21127259
ELK1-Dam_1021	chr10	79316821	79317213
ELK1-Dam_1022	chr7	133414845	133415517
ELK1-Dam_1023	chr2	151931819	151932583
ELK1-Dam_1024	chr11	70469026	70469390
ELK1-Dam_1025	chr4	151412843	151413256
ELK1-Dam_1026	chr4	34832957	34833217
ELK1-Dam_1027	chr4	128867485	128868508
ELK1-Dam_1028	chr6	141199125	141199686
ELK1-Dam_1029	chr2	31801669	31802035
ELK1-Dam_1030	chr17	47748239	47749436
ELK1-Dam_1031	chr2	130249927	130250331
ELK1-Dam_1032	chr19	40344783	40345163
ELK1-Dam_1033	chr2	59451194	59451520
ELK1-Dam_1034	chr11	72957100	72957748
ELK1-Dam_1035	chr8	23918807	23919356
ELK1-Dam_1036	chr7	29165346	29165748
ELK1-Dam_1037	chr2	90622228	90622829
ELK1-Dam_1038	chr11	105808075	105808545
ELK1-Dam_1039	chr13	59776055	59776632
ELK1-Dam_1040	chr15	73575159	73576257
ELK1-Dam_1041	chr1	136257412	136257703
ELK1-Dam_1042	chr17	5115553	5116805
ELK1-Dam_1043	chr16	35869750	35869997
ELK1-Dam_1044	chr10	79760693	79760952
ELK1-Dam_1045	chr15	98860828	98861455
ELK1-Dam_1046	chr5	125032289	125032725
ELK1-Dam_1047	chr5	23930096	23930704
ELK1-Dam_1048	chr9	65972927	65974273
ELK1-Dam_1049	chr1	63224642	63225070
ELK1-Dam_1050	chr2	26764339	26764818
ELK1-Dam_1051	chr7	137866635	137867255
ELK1-Dam_1052	chr4	142752613	142753050
ELK1-Dam_1053	chr9	95413204	95414154
ELK1-Dam_1054	chr4	155424154	155425132
ELK1-Dam_1055	chr3	108247240	108248161
ELK1-Dam_1056	chr11	117001537	117002016
ELK1-Dam_1057	chr3	87423289	87425032
ELK1-Dam_1058	chr18	61666604	61666889
ELK1-Dam_1059	chr4	132797994	132798660
ELK1-Dam_1060	chr2	148599908	148600623
ELK1-Dam_1061	chr14	56196317	56196845
ELK1-Dam_1062	chr6	29384222	29384825
ELK1-Dam_1063	chr18	84853373	84853877
ELK1-Dam_1064	chr17	66131599	66131924
ELK1-Dam_1065	chr2	152241129	152241563
ELK1-Dam_1066	chr16	56036572	56037287
ELK1-Dam_1067	chr11	117860530	117860881
ELK1-Dam_1068	chr1	120208725	120209067
ELK1-Dam_1069	chr12	60318888	60319642
ELK1-Dam_1070	chr16	23106519	23107173
ELK1-Dam_1071	chr14	52504323	52504584
ELK1-Dam_1072	chr4	155269664	155270014
ELK1-Dam_1073	chr1	174241590	174241952
ELK1-Dam_1074	chr8	4678048	4678478
ELK1-Dam_1075	chr10	80730562	80730860
ELK1-Dam_1076	chr12	114250933	114251923
ELK1-Dam_1077	chr8	73895968	73896583
ELK1-Dam_1078	chr12	21292695	21293326
ELK1-Dam_1079	chrX	7417999	7418768
ELK1-Dam_1080	chr10	80140421	80140963
ELK1-Dam_1081	chr2	152431412	152431707
ELK1-Dam_1082	chr3	93353799	93354155
ELK1-Dam_1083	chr12	17005724	17007032
ELK1-Dam_1084	chr2	25048967	25049678
ELK1-Dam_1085	chr7	4100561	4102502
ELK1-Dam_1086	chr11	77989643	77989953
ELK1-Dam_1087	chr7	29333325	29333795
ELK1-Dam_1088	chr16	94747060	94747568
ELK1-Dam_1089	chr13	113844629	113844984
ELK1-Dam_1090	chr8	108673758	108674058
ELK1-Dam_1091	chr11	115685792	115686456
ELK1-Dam_1092	chr6	29935156	29935405
ELK1-Dam_1093	chr8	113243944	113244376
ELK1-Dam_1094	chr3	105491405	105491982
ELK1-Dam_1095	chr11	68853148	68854076
ELK1-Dam_1096	chr1	127330924	127331379
ELK1-Dam_1097	chr13	91063603	91063892
ELK1-Dam_1098	chr10	18026900	18027145
ELK1-Dam_1099	chr4	43059863	43060240
ELK1-Dam_1100	chr12	114170695	114171276
ELK1-Dam_1101	chr8	37674471	37674715
ELK1-Dam_1102	chr10	92624928	92625504
ELK1-Dam_1103	chr15	9003425	9003892
ELK1-Dam_1104	chr7	19814360	19815094
ELK1-Dam_1105	chr15	99499996	99500554
ELK1-Dam_1106	chr7	137660915	137661189
ELK1-Dam_1107	chr19	47994062	47994406
ELK1-Dam_1108	chr1	168338665	168339284
ELK1-Dam_1109	chr11	82684043	82684345
ELK1-Dam_1110	chr8	42199717	42200213
ELK1-Dam_1111	chr4	41708190	41708445
ELK1-Dam_1112	chr7	28271461	28271948
ELK1-Dam_1113	chr11	31772476	31772875
ELK1-Dam_1114	chr8	124986094	124986573
ELK1-Dam_1115	chrX	156939674	156939927
ELK1-Dam_1116	chr2	120995608	120996152
ELK1-Dam_1117	chr4	129495159	129496817
ELK1-Dam_1118	chr1	79760027	79761426
ELK1-Dam_1119	chr11	70832829	70833115
ELK1-Dam_1120	chr17	47432406	47433027
ELK1-Dam_1121	chr13	55121903	55123371
ELK1-Dam_1122	chr7	118126314	118127102
ELK1-Dam_1123	chr4	41675853	41676140
ELK1-Dam_1124	chr5	8997510	8998223
ELK1-Dam_1125	chr1	137044906	137045235
ELK1-Dam_1126	chr15	35866717	35867279
ELK1-Dam_1127	chr18	35899507	35899873
ELK1-Dam_1128	chr7	31900730	31901086
ELK1-Dam_1129	chr15	98437696	98438057
ELK1-Dam_1130	chr11	4748340	4748878
ELK1-Dam_1131	chr19	44367087	44367840
ELK1-Dam_1132	chr5	93470817	93471222
ELK1-Dam_1133	chr9	21230029	21230502
ELK1-Dam_1134	chr2	181314602	181315942
ELK1-Dam_1135	chr16	46010917	46011324
ELK1-Dam_1136	chr7	118127973	118128634
ELK1-Dam_1137	chr1	88367715	88367970
ELK1-Dam_1138	chr5	117836669	117837064
ELK1-Dam_1139	chr2	77655709	77656058
ELK1-Dam_1140	chr19	55327914	55328395
ELK1-Dam_1141	chr8	113781936	113782252
ELK1-Dam_1142	chr9	108552144	108552764
ELK1-Dam_1143	chr6	5205815	5206140
ELK1-Dam_1144	chr10	93003064	93003483
ELK1-Dam_1145	chr16	35938688	35939481
ELK1-Dam_1146	chr11	100956426	100957407
ELK1-Dam_1147	chr2	121277955	121279149
ELK1-Dam_1148	chr6	54761273	54762364
ELK1-Dam_1149	chr6	83745648	83746788
ELK1-Dam_1150	chr2	26763291	26763906
ELK1-Dam_1151	chr11	95446758	95447093
ELK1-Dam_1152	chr18	12286836	12287190
ELK1-Dam_1153	chr1	164478920	164479437
ELK1-Dam_1154	chr11	74642882	74643785
ELK1-Dam_1155	chr7	138078874	138079446
ELK1-Dam_1156	chr10	126343195	126343764
ELK1-Dam_1157	chr18	15563643	15564243
ELK1-Dam_1158	chr19	5845064	5845647
ELK1-Dam_1159	chr11	98218855	98219458
ELK1-Dam_1160	chr11	96651824	96652365
ELK1-Dam_1161	chr16	30066151	30066798
ELK1-Dam_1162	chr19	4203564	4204137
ELK1-Dam_1163	chr9	59138400	59139269
ELK1-Dam_1164	chr11	70246540	70247180
ELK1-Dam_1165	chr10	83907534	83907783
ELK1-Dam_1166	chr2	11626312	11627127
ELK1-Dam_1167	chr8	108404265	108405100
ELK1-Dam_1168	chr13	93380258	93380542
ELK1-Dam_1169	chr13	53472030	53472405
ELK1-Dam_1170	chr7	25688481	25689181
ELK1-Dam_1171	chr17	25983783	25984111
ELK1-Dam_1172	chr4	125919516	125919989
ELK1-Dam_1173	chr1	173165122	173165668
ELK1-Dam_1174	chr2	155340789	155341088
ELK1-Dam_1175	chr13	54793946	54794552
ELK1-Dam_1176	chr16	17558594	17559058
ELK1-Dam_1177	chr12	77939128	77939447
ELK1-Dam_1178	chr13	59758110	59758652
ELK1-Dam_1179	chr19	43747513	43748433
ELK1-Dam_1180	chr9	56786093	56786545
ELK1-Dam_1181	chr13	47218688	47219077
ELK1-Dam_1182	chr2	162842452	162842791
ELK1-Dam_1183	chr8	113444236	113445065
ELK1-Dam_1184	chr5	24347017	24347535
ELK1-Dam_1185	chr6	113690748	113690998
ELK1-Dam_1186	chr5	108740924	108741609
ELK1-Dam_1187	chr17	71350651	71351056
ELK1-Dam_1188	chr2	150575961	150576271
ELK1-Dam_1189	chr5	34863661	34864026
ELK1-Dam_1190	chr11	97860952	97861379
ELK1-Dam_1191	chr10	72117217	72118245
ELK1-Dam_1192	chr3	106524174	106524427
ELK1-Dam_1193	chr14	60870479	60871208
ELK1-Dam_1194	chr17	46629738	46630179
ELK1-Dam_1195	chr4	147998863	147999593
ELK1-Dam_1196	chr1	36121033	36123303
ELK1-Dam_1197	chr1	153190282	153191174
ELK1-Dam_1198	chr10	127983633	127984119
ELK1-Dam_1199	chr13	92016487	92016951
ELK1-Dam_1200	chr16	15638179	15638426
ELK1-Dam_1201	chr1	156992793	156993035
ELK1-Dam_1202	chr3	96405932	96406416
ELK1-Dam_1203	chr19	47539421	47540073
ELK1-Dam_1204	chr15	68755570	68756688
ELK1-Dam_1205	chr2	148699702	148700431
ELK1-Dam_1206	chr4	133575684	133576441
ELK1-Dam_1207	chr14	66914884	66915572
ELK1-Dam_1208	chr4	59819519	59819951
ELK1-Dam_1209	chr2	30092302	30092824
ELK1-Dam_1210	chr12	8307368	8307912
ELK1-Dam_1211	chr8	73920194	73920716
ELK1-Dam_1212	chr10	60913024	60913743
ELK1-Dam_1213	chr4	122513068	122513403
ELK1-Dam_1214	chr14	102127814	102128136
ELK1-Dam_1215	chr10	80847105	80847550
ELK1-Dam_1216	chr11	115761753	115763076
ELK1-Dam_1217	chr16	87440949	87441375
ELK1-Dam_1218	chr15	103102760	103103050
ELK1-Dam_1219	chr1	152838171	152838644
ELK1-Dam_1220	chr7	148195445	148195701
ELK1-Dam_1221	chr7	52112478	52113665
ELK1-Dam_1222	chr11	118221908	118222233
ELK1-Dam_1223	chr1	75217992	75218399
ELK1-Dam_1224	chr11	100512592	100512952
ELK1-Dam_1225	chr12	113855179	113856194
ELK1-Dam_1226	chr14	58190525	58190779
ELK1-Dam_1227	chr11	104467921	104468667
ELK1-Dam_1228	chr2	118605600	118605933
ELK1-Dam_1229	chr5	123845287	123845610
ELK1-Dam_1230	chr9	20935027	20935377
ELK1-Dam_1231	chr4	129012927	129013845
ELK1-Dam_1232	chr14	63741975	63743000
ELK1-Dam_1233	chr12	25782493	25783535
ELK1-Dam_1234	chr19	8963343	8964467
ELK1-Dam_1235	chr11	51661904	51662715
ELK1-Dam_1236	chr6	72566983	72567343
ELK1-Dam_1237	chr11	69436264	69436956
ELK1-Dam_1238	chr3	108365557	108365923
ELK1-Dam_1239	chr13	114406263	114406625
ELK1-Dam_1240	chr15	99288550	99288948
ELK1-Dam_1241	chr12	86114120	86115406
ELK1-Dam_1242	chr5	34063806	34064150
ELK1-Dam_1243	chr2	156023079	156023765
ELK1-Dam_1244	chr3	97704746	97705111
ELK1-Dam_1245	chr16	16984078	16984695
ELK1-Dam_1246	chr19	5729989	5731220
ELK1-Dam_1247	chr1	91004537	91005185
ELK1-Dam_1248	chr13	46598087	46598914
ELK1-Dam_1249	chr4	62020775	62021360
ELK1-Dam_1250	chr4	134051758	134053453
ELK1-Dam_1251	chr9	120037742	120038053
ELK1-Dam_1252	chr11	104412150	104412524
ELK1-Dam_1253	chr13	49402431	49402721
ELK1-Dam_1254	chr9	119847542	119848116
ELK1-Dam_1255	chr12	82633657	82634006
ELK1-Dam_1256	chr13	4771206	4771470
ELK1-Dam_1257	chr2	153319374	153319796
ELK1-Dam_1258	chr4	16091381	16091832
ELK1-Dam_1259	chr9	96529816	96530735
ELK1-Dam_1260	chr2	156373716	156374002
ELK1-Dam_1261	chr10	93004789	93005285
ELK1-Dam_1262	chr11	98636248	98636689
ELK1-Dam_1263	chr2	4838836	4839183
ELK1-Dam_1264	chr15	58702990	58704407
ELK1-Dam_1265	chr8	108691746	108692503
ELK1-Dam_1266	chr18	46360014	46360281
ELK1-Dam_1267	chr4	9772993	9773988
ELK1-Dam_1268	chr1	90968121	90968400
ELK1-Dam_1269	chr9	57408460	57408844
ELK1-Dam_1270	chr11	62460527	62461146
ELK1-Dam_1271	chr14	70501090	70501775
ELK1-Dam_1272	chr5	8996166	8996561
ELK1-Dam_1273	chr16	17111024	17111464
ELK1-Dam_1274	chr2	144284236	144284658
ELK1-Dam_1275	chr17	87356988	87357815
ELK1-Dam_1276	chr4	140368002	140368438
ELK1-Dam_1277	chr6	83485625	83485908
ELK1-Dam_1278	chr6	87932997	87933390
ELK1-Dam_1279	chr15	99479541	99480331
ELK1-Dam_1280	chr6	47761551	47762369
ELK1-Dam_1281	chr12	114379335	114379696
ELK1-Dam_1282	chr7	109020905	109021288
ELK1-Dam_1283	chr12	111723886	111724704
ELK1-Dam_1284	chr3	135392226	135392727
ELK1-Dam_1285	chr4	151468573	151469154
ELK1-Dam_1286	chr8	127043738	127044440
ELK1-Dam_1287	chr4	138529376	138529769
ELK1-Dam_1288	chr16	17209656	17209903
ELK1-Dam_1289	chr2	93689896	93690175
ELK1-Dam_1290	chr12	8680050	8680590
ELK1-Dam_1291	chr11	78158567	78159464
ELK1-Dam_1292	chr11	75412009	75412288
ELK1-Dam_1293	chr5	65590720	65591049
ELK1-Dam_1294	chr14	70842381	70842657
ELK1-Dam_1295	chr14	55556363	55557240
ELK1-Dam_1296	chr2	156687821	156688297
ELK1-Dam_1297	chr3	89578102	89578569
ELK1-Dam_1298	chr8	74151903	74152306
ELK1-Dam_1299	chr4	116799616	116799979
ELK1-Dam_1300	chr18	34489839	34490187
ELK1-Dam_1301	chr17	5493800	5494158
ELK1-Dam_1302	chr12	72237674	72238002
ELK1-Dam_1303	chr4	132833186	132833781
ELK1-Dam_1304	chr7	63304391	63305417
ELK1-Dam_1305	chr5	123585158	123585487
ELK1-Dam_1306	chr6	82714642	82714929
ELK1-Dam_1307	chr8	87368398	87368676
ELK1-Dam_1308	chr1	174306459	174306760
ELK1-Dam_1309	chr16	38361408	38362035
ELK1-Dam_1310	chr10	61440113	61440586
ELK1-Dam_1311	chr4	117588170	117589309
ELK1-Dam_1312	chr2	93998014	93998604
ELK1-Dam_1313	chr16	20497082	20497587
ELK1-Dam_1314	chr8	127097684	127098163
ELK1-Dam_1315	chr11	69223783	69224107
ELK1-Dam_1316	chr7	147307877	147308372
ELK1-Dam_1317	chr7	128177451	128177730
ELK1-Dam_1318	chr2	163244154	163244395
ELK1-Dam_1319	chr11	100408025	100408354
ELK1-Dam_1320	chr1	129572109	129573028
ELK1-Dam_1321	chr12	82958652	82959002
ELK1-Dam_1322	chr5	108560796	108561090
ELK1-Dam_1323	chr14	63752253	63752565
ELK1-Dam_1324	chr11	87549865	87550383
ELK1-Dam_1325	chr8	87607238	87607852
ELK1-Dam_1326	chr12	113959069	113960048
ELK1-Dam_1327	chr1	122017058	122017519
ELK1-Dam_1328	chrX	6998415	6998748
ELK1-Dam_1329	chr19	41339040	41339858
ELK1-Dam_1330	chr12	72070462	72070884
ELK1-Dam_1331	chr17	26980559	26981852
ELK1-Dam_1332	chr6	29418247	29418897
ELK1-Dam_1333	chr11	80620767	80621170
ELK1-Dam_1334	chr14	47504214	47504493
ELK1-Dam_1335	chr4	116381783	116382069
ELK1-Dam_1336	chr1	74045779	74046279
ELK1-Dam_1337	chr8	90721948	90722653
ELK1-Dam_1338	chr17	57386838	57387295
ELK1-Dam_1339	chr12	85532485	85533392
ELK1-Dam_1340	chr2	90686427	90686673
ELK1-Dam_1341	chr19	7054980	7055397
ELK1-Dam_1342	chr5	33679707	33680049
ELK1-Dam_1343	chr4	123005766	123006094
ELK1-Dam_1344	chr15	101203088	101203549
ELK1-Dam_1345	chr11	57984966	57985257
ELK1-Dam_1346	chr12	101348530	101349015
ELK1-Dam_1347	chr11	117658896	117659322
ELK1-Dam_1348	chr15	57723232	57723455
ELK1-Dam_1349	chr1	108439963	108440537
ELK1-Dam_1350	chr10	5955863	5956318
ELK1-Dam_1351	chr4	41261971	41262284
ELK1-Dam_1352	chr15	74550696	74551148
ELK1-Dam_1353	chr5	33615944	33616316
ELK1-Dam_1354	chr11	50103866	50104976
ELK1-Dam_1355	chr2	31007222	31007617
ELK1-Dam_1356	chr17	25219299	25220797
ELK1-Dam_1357	chr7	134888738	134889103
ELK1-Dam_1358	chr17	36052784	36053155
ELK1-Dam_1359	chr6	81875659	81876124
ELK1-Dam_1360	chr19	18786603	18786982
ELK1-Dam_1361	chr7	129209523	129210266
ELK1-Dam_1362	chr7	133819403	133819683
ELK1-Dam_1363	chr6	38591340	38591943
ELK1-Dam_1364	chr11	59283695	59283955
ELK1-Dam_1365	chr7	53649746	53650167
ELK1-Dam_1366	chr7	112887998	112888504
ELK1-Dam_1367	chr1	123223336	123223786
ELK1-Dam_1368	chrX	147451038	147451680
ELK1-Dam_1369	chr13	58259399	58259809
ELK1-Dam_1370	chr8	108490731	108491120
ELK1-Dam_1371	chr8	11309839	11310183
ELK1-Dam_1372	chr3	89028026	89028377
ELK1-Dam_1373	chrX	136015842	136016398
ELK1-Dam_1374	chr10	79896571	79896960
ELK1-Dam_1375	chr6	52664446	52664758
ELK1-Dam_1376	chr3	108366372	108366797
ELK1-Dam_1377	chr15	68757796	68758613
ELK1-Dam_1378	chr5	139853857	139855540
ELK1-Dam_1379	chr5	68236246	68236644
ELK1-Dam_1380	chr8	72658696	72659095
ELK1-Dam_1381	chr15	12252410	12253040
ELK1-Dam_1382	chr8	88079895	88080232
ELK1-Dam_1383	chr4	12013419	12013759
ELK1-Dam_1384	chr1	145586991	145587278
ELK1-Dam_1385	chr14	56290641	56291495
ELK1-Dam_1386	chr3	137794662	137795045
ELK1-Dam_1387	chr4	134478010	134478531
ELK1-Dam_1388	chr4	126699682	126700598
ELK1-Dam_1389	chr3	96837344	96837732
ELK1-Dam_1390	chr19	6014723	6015043
ELK1-Dam_1391	chr1	137640098	137640574
ELK1-Dam_1392	chr5	34000676	34001221
ELK1-Dam_1393	chr11	58680375	58680743
ELK1-Dam_1394	chr5	124772110	124772366
ELK1-Dam_1395	chr2	155338721	155339738
ELK1-Dam_1396	chr10	86118746	86119174
ELK1-Dam_1397	chr11	53591347	53591831
ELK1-Dam_1398	chr2	151803790	151804908
ELK1-Dam_1399	chr9	53343222	53344186
ELK1-Dam_1400	chr19	41555927	41556332
ELK1-Dam_1401	chr3	40888856	40889517
ELK1-Dam_1402	chr9	20972305	20972694
ELK1-Dam_1403	chr4	128642794	128643225
ELK1-Dam_1404	chr4	128745296	128745868
ELK1-Dam_1405	chr2	26772153	26772430
ELK1-Dam_1406	chr2	35514646	35515147
ELK1-Dam_1407	chr11	69364657	69365085
ELK1-Dam_1408	chr19	5688933	5689383
ELK1-Dam_1409	chr9	53056288	53056744
ELK1-Dam_1410	chr6	100620172	100620465
ELK1-Dam_1411	chr14	70556628	70557070
ELK1-Dam_1412	chr8	129115646	129116060
ELK1-Dam_1413	chr2	91564954	91565319
ELK1-Dam_1414	chr9	50554285	50554597
ELK1-Dam_1415	chr7	19705723	19706148
ELK1-Dam_1416	chr9	30751338	30751675
ELK1-Dam_1417	chr9	107980605	107981213
ELK1-Dam_1418	chr12	113833675	113834207
ELK1-Dam_1419	chr7	140900996	140901837
ELK1-Dam_1420	chr11	75324534	75324961
ELK1-Dam_1421	chr1	174425339	174425630
ELK1-Dam_1422	chr8	72517967	72518220
ELK1-Dam_1423	chr1	52176686	52176989
ELK1-Dam_1424	chr11	68714550	68714920
ELK1-Dam_1425	chr3	90204705	90205199
ELK1-Dam_1426	chr14	17406254	17407355
ELK1-Dam_1427	chr2	6244899	6245268
ELK1-Dam_1428	chr5	143669598	143670384
ELK1-Dam_1429	chr11	109471321	109471966
ELK1-Dam_1430	chr14	63866931	63867258
ELK1-Dam_1431	chr18	80431577	80431981
ELK1-Dam_1432	chr4	141157379	141158225
ELK1-Dam_1433	chrX	166416693	166417750
ELK1-Dam_1434	chr2	30141152	30141620
ELK1-Dam_1435	chr8	59805720	59806685
ELK1-Dam_1436	chr19	6242110	6242375
ELK1-Dam_1437	chr15	99552922	99553935
ELK1-Dam_1438	chr1	87792254	87792810
ELK1-Dam_1439	chr10	75903691	75904469
ELK1-Dam_1440	chr6	128385162	128385516
ELK1-Dam_1441	chr11	43514131	43514728
ELK1-Dam_1442	chr8	127385893	127386508
ELK1-Dam_1443	chr16	38559382	38559764
ELK1-Dam_1444	chr15	81687702	81688196
ELK1-Dam_1445	chr19	34601306	34601565
ELK1-Dam_1446	chr9	44504901	44505576
ELK1-Dam_1447	chr7	148469399	148469744
ELK1-Dam_1448	chr4	114671840	114672103
ELK1-Dam_1449	chr11	70260720	70261173
ELK1-Dam_1450	chr11	119093075	119093405
ELK1-Dam_1451	chr18	36509081	36509595
ELK1-Dam_1452	chr8	32224495	32224780
ELK1-Dam_1453	chr7	149556120	149556713
ELK1-Dam_1454	chr2	145759600	145760150
ELK1-Dam_1455	chr19	42825950	42827198
ELK1-Dam_1456	chr11	101442874	101443239
ELK1-Dam_1457	chr6	57485218	57485815
ELK1-Dam_1458	chr7	31320668	31320907
ELK1-Dam_1459	chr1	129626999	129627484
ELK1-Dam_1460	chr15	81894208	81895427
ELK1-Dam_1461	chr17	53707717	53709089
ELK1-Dam_1462	chr5	143721186	143721511
ELK1-Dam_1463	chr15	76525355	76526925
ELK1-Dam_1464	chr4	131978577	131978866
ELK1-Dam_1465	chr8	106920350	106920868
ELK1-Dam_1466	chr1	74282219	74282621
ELK1-Dam_1467	chr8	8688676	8688953
ELK1-Dam_1468	chr7	17509717	17510192
ELK1-Dam_1469	chr17	35154499	35155131
ELK1-Dam_1470	chr10	126513032	126513344
ELK1-Dam_1471	chr12	112650017	112651037
ELK1-Dam_1472	chr19	31157239	31157495
ELK1-Dam_1473	chr2	30702128	30702467
ELK1-Dam_1474	chr7	34885630	34886201
ELK1-Dam_1475	chr5	114829311	114829582
ELK1-Dam_1476	chr18	75523067	75523756
ELK1-Dam_1477	chr2	153058536	153059071
ELK1-Dam_1478	chr17	81128199	81129123
ELK1-Dam_1479	chr6	56655242	56655806
ELK1-Dam_1480	chr8	48618545	48618951
ELK1-Dam_1481	chrX	131291275	131291642
ELK1-Dam_1482	chrX	91479217	91479506
ELK1-Dam_1483	chr10	82162569	82162824
ELK1-Dam_1484	chr10	80086329	80086832
ELK1-Dam_1485	chr7	53068657	53068980
ELK1-Dam_1486	chr16	11175626	11175899
ELK1-Dam_1487	chr9	107792368	107792817
ELK1-Dam_1488	chr15	99416206	99416743
ELK1-Dam_1489	chr7	16806941	16807621
ELK1-Dam_1490	chr18	32717141	32717471
ELK1-Dam_1491	chr7	52891230	52891483
ELK1-Dam_1492	chr6	117868319	117869309
ELK1-Dam_1493	chr17	36258366	36258703
ELK1-Dam_1494	chr2	165113413	165113729
ELK1-Dam_1495	chr17	49964882	49965322
ELK1-Dam_1496	chr5	33993912	33994125
ELK1-Dam_1497	chr7	19857089	19857392
ELK1-Dam_1498	chr11	101176220	101176509
ELK1-Dam_1499	chr6	24479887	24480535
ELK1-Dam_1500	chr10	66745742	66747101
ELK1-Dam_1501	chr16	20652611	20653014
ELK1-Dam_1502	chr11	102080787	102081181
ELK1-Dam_1503	chr15	63890655	63890898
ELK1-Dam_1504	chr11	69013970	69014216
ELK1-Dam_1505	chr5	138613042	138613413
ELK1-Dam_1506	chr1	169239359	169239608
ELK1-Dam_1507	chr16	93629271	93629563
ELK1-Dam_1508	chr11	67780396	67780849
ELK1-Dam_1509	chr8	25549680	25550037
ELK1-Dam_1510	chr9	121672937	121673505
ELK1-Dam_1511	chr13	6645883	6646352
ELK1-Dam_1512	chr4	150288740	150289666
ELK1-Dam_1513	chr5	130478478	130478769
ELK1-Dam_1514	chr5	64548735	64549281
ELK1-Dam_1515	chr11	53577607	53578346
ELK1-Dam_1516	chr4	141349996	141350311
ELK1-Dam_1517	chr2	74558262	74558530
ELK1-Dam_1518	chr3	30500721	30501021
ELK1-Dam_1519	chr6	56654227	56654908
ELK1-Dam_1520	chr1	184448915	184449450
ELK1-Dam_1521	chr5	122827012	122827449
ELK1-Dam_1522	chr18	24491948	24492356
ELK1-Dam_1523	chr13	47138268	47138530
ELK1-Dam_1524	chr8	93351853	93352351
ELK1-Dam_1525	chr11	59655044	59656161
ELK1-Dam_1526	chr9	45746851	45747250
ELK1-Dam_1527	chr5	86600312	86601050
ELK1-Dam_1528	chr3	97470774	97471064
ELK1-Dam_1529	chr1	137625215	137625497
ELK1-Dam_1530	chr1	192916586	192917033
ELK1-Dam_1531	chr4	43573847	43574203
ELK1-Dam_1532	chr15	84872804	84873065
ELK1-Dam_1533	chr12	45370694	45371455
ELK1-Dam_1534	chr3	89215365	89216099
ELK1-Dam_1535	chr7	117439809	117440532
ELK1-Dam_1536	chr7	34954305	34954570
ELK1-Dam_1537	chr6	40274572	40275439
ELK1-Dam_1538	chr16	14705598	14706290
ELK1-Dam_1539	chr11	3308060	3308353
ELK1-Dam_1540	chr8	59989101	59989523
ELK1-Dam_1541	chr2	69551496	69552124
ELK1-Dam_1542	chr10	89147956	89148316
ELK1-Dam_1543	chr5	138042101	138042421
ELK1-Dam_1544	chr4	114733407	114733874
ELK1-Dam_1545	chr4	149076265	149076666
ELK1-Dam_1546	chr8	108130425	108131341
ELK1-Dam_1547	chr4	136158913	136159288
ELK1-Dam_1548	chr19	24252381	24252625
ELK1-Dam_1549	chr5	31600333	31600847
ELK1-Dam_1550	chr17	95148958	95149312
ELK1-Dam_1551	chr6	124779695	124780234
ELK1-Dam_1552	chr4	129255154	129256351
ELK1-Dam_1553	chr14	32137502	32137909
ELK1-Dam_1554	chr7	117769088	117769765
ELK1-Dam_1555	chr1	153417856	153418139
ELK1-Dam_1556	chr8	15018645	15019128
ELK1-Dam_1557	chr3	28679271	28679517
ELK1-Dam_1558	chr6	83059811	83060201
ELK1-Dam_1559	chr11	61082391	61082886
ELK1-Dam_1560	chr19	5904730	5905259
ELK1-Dam_1561	chr2	19474129	19474782
ELK1-Dam_1562	chr6	119426073	119426847
ELK1-Dam_1563	chr4	62068833	62069270
ELK1-Dam_1564	chr15	99484883	99485135
ELK1-Dam_1565	chr4	151669504	151669924
ELK1-Dam_1566	chr2	69700158	69700487
ELK1-Dam_1567	chr14	27489240	27489953
ELK1-Dam_1568	chr15	74545551	74546056
ELK1-Dam_1569	chr15	80096426	80096719
ELK1-Dam_1570	chrX	166418205	166418731
ELK1-Dam_1571	chr11	101163155	101163510
ELK1-Dam_1572	chr17	23723230	23723639
ELK1-Dam_1573	chr5	36916841	36917453
ELK1-Dam_1574	chr18	74020760	74021195
ELK1-Dam_1575	chr2	94276700	94277501
ELK1-Dam_1576	chr4	129302177	129302820
ELK1-Dam_1577	chr5	120958839	120959207
ELK1-Dam_1578	chr3	88141598	88142235
ELK1-Dam_1579	chr18	89062540	89063021
ELK1-Dam_1580	chr10	126650136	126650618
ELK1-Dam_1581	chr13	94074792	94075126
ELK1-Dam_1582	chr8	109413414	109413666
ELK1-Dam_1583	chrX	163648426	163648809
ELK1-Dam_1584	chr7	54186162	54186448
ELK1-Dam_1585	chr15	76531322	76531847
ELK1-Dam_1586	chr3	95861842	95862351
ELK1-Dam_1587	chr9	44285510	44286193
ELK1-Dam_1588	chr2	29722954	29723697
ELK1-Dam_1589	chr17	25930116	25930792
ELK1-Dam_1590	chr2	33070690	33071091
ELK1-Dam_1591	chr5	137501391	137501685
ELK1-Dam_1592	chr11	4119003	4119682
ELK1-Dam_1593	chr2	113879837	113880612
ELK1-Dam_1594	chr15	80085305	80085676
ELK1-Dam_1595	chr10	127648129	127648574
ELK1-Dam_1596	chr4	118215550	118215875
ELK1-Dam_1597	chr4	140800008	140800796
ELK1-Dam_1598	chr11	40507862	40508186
ELK1-Dam_1599	chr17	73187311	73188305
ELK1-Dam_1600	chr13	74945093	74945374
ELK1-Dam_1601	chr1	172040754	172041217
ELK1-Dam_1602	chr14	54873326	54873722
ELK1-Dam_1603	chr2	152197953	152198618
ELK1-Dam_1604	chr2	91867953	91868601
ELK1-Dam_1605	chr1	21208904	21209187
ELK1-Dam_1606	chr2	112107540	112108383
ELK1-Dam_1607	chr4	133743690	133744207
ELK1-Dam_1608	chr15	8393190	8393484
ELK1-Dam_1609	chr17	8503487	8503901
ELK1-Dam_1610	chrX	148607581	148607978
ELK1-Dam_1611	chr7	4497330	4497589
ELK1-Dam_1612	chr2	165112215	165112488
ELK1-Dam_1613	chr1	136302169	136302515
ELK1-Dam_1614	chr11	101413428	101414349
ELK1-Dam_1615	chr17	31432637	31432921
ELK1-Dam_1616	chr4	154861882	154862745
ELK1-Dam_1617	chr11	97662054	97662699
ELK1-Dam_1618	chr10	74980734	74981004
ELK1-Dam_1619	chr6	97201425	97202221
ELK1-Dam_1620	chr1	193812429	193812836
ELK1-Dam_1621	chr3	54916900	54917869
ELK1-Dam_1622	chr14	55196641	55196952
ELK1-Dam_1623	chr1	184055538	184056111
ELK1-Dam_1624	chr17	24591190	24591663
ELK1-Dam_1625	chr9	44157081	44157473
ELK1-Dam_1626	chr18	84258659	84259321
ELK1-Dam_1627	chr14	76410762	76411185
ELK1-Dam_1628	chrX	166419339	166419680
ELK1-Dam_1629	chr4	133227774	133228147
ELK1-Dam_1630	chr1	94830443	94830699
ELK1-Dam_1631	chr6	113691460	113691891
ELK1-Dam_1632	chr1	84836913	84837504
ELK1-Dam_1633	chr4	106582808	106583132
ELK1-Dam_1634	chr7	73224227	73224547
ELK1-Dam_1635	chr2	143736445	143736804
ELK1-Dam_1636	chr17	45872159	45872476
ELK1-Dam_1637	chrX	48370336	48370687
ELK1-Dam_1638	chr4	154441963	154442213
ELK1-Dam_1639	chr10	79460027	79460383
ELK1-Dam_1640	chr14	17075833	17076842
ELK1-Dam_1641	chr11	115969860	115970231
ELK1-Dam_1642	chrX	71489352	71489647
ELK1-Dam_1643	chr14	30792159	30793562
ELK1-Dam_1644	chr7	54175544	54175828
ELK1-Dam_1645	chr1	182122038	182123050
ELK1-Dam_1646	chr1	163000670	163000931
ELK1-Dam_1647	chr9	107897044	107897481
ELK1-Dam_1648	chr8	86264096	86264417
ELK1-Dam_1649	chr11	76324496	76324783
ELK1-Dam_1650	chr12	101439281	101439957
ELK1-Dam_1651	chr7	117204056	117204378
ELK1-Dam_1652	chr8	86592258	86592919
ELK1-Dam_1653	chr2	164252070	164252727
ELK1-Dam_1654	chr8	107828148	107828440
ELK1-Dam_1655	chr4	3605203	3605453
ELK1-Dam_1656	chr11	55275041	55275371
ELK1-Dam_1657	chrX	65930173	65930939
ELK1-Dam_1658	chr12	8928076	8928612
ELK1-Dam_1659	chr4	115726054	115726445
ELK1-Dam_1660	chr10	127473484	127474265
ELK1-Dam_1661	chr7	87405970	87406242
ELK1-Dam_1662	chr9	43923646	43924055
ELK1-Dam_1663	chr4	15886118	15886510
ELK1-Dam_1664	chr4	117029206	117029486
ELK1-Dam_1665	chr19	31837157	31837413
ELK1-Dam_1666	chr12	3235196	3235448
ELK1-Dam_1667	chr17	34080078	34080585
ELK1-Dam_1668	chr19	6127042	6127397
ELK1-Dam_1669	chr2	167445983	167446350
ELK1-Dam_1670	chr4	117001499	117001752
ELK1-Dam_1671	chr14	32307010	32307771
ELK1-Dam_1672	chr11	105809629	105809953
ELK1-Dam_1673	chr7	141916867	141917627
ELK1-Dam_1674	chr11	72950259	72950800
ELK1-Dam_1675	chr11	55852627	55852864
ELK1-Dam_1676	chr12	35732964	35733288
ELK1-Dam_1677	chr11	94336597	94337163
ELK1-Dam_1678	chr9	64584159	64584413
ELK1-Dam_1679	chr7	140967629	140967954
ELK1-Dam_1680	chr16	16897531	16897797
ELK1-Dam_1681	chr18	24867047	24867404
ELK1-Dam_1682	chr16	13358816	13359400
ELK1-Dam_1683	chr1	73984059	73984528
ELK1-Dam_1684	chr4	135800117	135800438
ELK1-Dam_1685	chr17	78597302	78597912
ELK1-Dam_1686	chr14	122505353	122506001
ELK1-Dam_1687	chr5	77544294	77544583
ELK1-Dam_1688	chr5	117583848	117584204
ELK1-Dam_1689	chr8	107655408	107655841
ELK1-Dam_1690	chr9	114297289	114297624
ELK1-Dam_1691	chr14	51543382	51543699
ELK1-Dam_1692	chr2	119622884	119623387
ELK1-Dam_1693	chr4	115458003	115458748
ELK1-Dam_1694	chr8	81899375	81900064
ELK1-Dam_1695	chr5	122716780	122717459
ELK1-Dam_1696	chr10	86168409	86168908
ELK1-Dam_1697	chr1	133035934	133036258
ELK1-Dam_1698	chr4	141428751	141429053
ELK1-Dam_1699	chr11	83242502	83242735
ELK1-Dam_1700	chr14	71058830	71059116
ELK1-Dam_1701	chr8	107820996	107821324
ELK1-Dam_1702	chr2	130099886	130100267
ELK1-Dam_1703	chr17	80293680	80294058
ELK1-Dam_1704	chr18	42421743	42421990
ELK1-Dam_1705	chr13	69681253	69681606
ELK1-Dam_1706	chr2	31944849	31945245
ELK1-Dam_1707	chr2	121973420	121973700
ELK1-Dam_1708	chr12	8309786	8310357
ELK1-Dam_1709	chr2	91571199	91571577
ELK1-Dam_1710	chr7	80517630	80518122
ELK1-Dam_1711	chr17	79280423	79281081
ELK1-Dam_1712	chr16	30060225	30060515
ELK1-Dam_1713	chr15	99303838	99304532
ELK1-Dam_1714	chr15	76180208	76180646
ELK1-Dam_1715	chr16	56030606	56031070
ELK1-Dam_1716	chr6	94647694	94648360
ELK1-Dam_1717	chr7	24897469	24897798
ELK1-Dam_1718	chr5	137747874	137748293
ELK1-Dam_1719	chr13	73605739	73606090
ELK1-Dam_1720	chr2	155061573	155061998
ELK1-Dam_1721	chr16	17200266	17200579
ELK1-Dam_1722	chr11	115023360	115023721
ELK1-Dam_1723	chr18	60763497	60763826
ELK1-Dam_1724	chr15	72890622	72890939
ELK1-Dam_1725	chr11	96891507	96892490
ELK1-Dam_1726	chr11	51910454	51911350
ELK1-Dam_1727	chr8	13676411	13676664
ELK1-Dam_1728	chr7	52123558	52123824
ELK1-Dam_1729	chr3	103595639	103596005
ELK1-Dam_1730	chr6	136827884	136828694
ELK1-Dam_1731	chr12	86620816	86621169
ELK1-Dam_1732	chr2	92299435	92300010
ELK1-Dam_1733	chr19	23762729	23763069
ELK1-Dam_1734	chrX	45610121	45610474
ELK1-Dam_1735	chr10	80782887	80783141
ELK1-Dam_1736	chr11	115375600	115375930
ELK1-Dam_1737	chr3	130973575	130973962
ELK1-Dam_1738	chr12	106246548	106246804
ELK1-Dam_1739	chr12	41175971	41176328
ELK1-Dam_1740	chr15	76207689	76207975
ELK1-Dam_1741	chr6	82722170	82722603
ELK1-Dam_1742	chr16	94746401	94746550
ELK1-Dam_1743	chr16	13667840	13668091
ELK1-Dam_1744	chr19	4839530	4840346
ELK1-Dam_1745	chr13	55257211	55257498
ELK1-Dam_1746	chr15	78765019	78765339
ELK1-Dam_1747	chr7	26443863	26444157
ELK1-Dam_1748	chr11	95377121	95377547
ELK1-Dam_1749	chrX	98644734	98645081
ELK1-Dam_1750	chr3	32718727	32719008
ELK1-Dam_1751	chr7	133840170	133840529
ELK1-Dam_1752	chr10	78035199	78035478
ELK1-Dam_1753	chr13	12552619	12553204
ELK1-Dam_1754	chr15	35300758	35301060
ELK1-Dam_1755	chr1	174307549	174307841
ELK1-Dam_1756	chr11	83755272	83755707
ELK1-Dam_1757	chr11	54946043	54946319
ELK1-Dam_1758	chr10	75261617	75262175
ELK1-Dam_1759	chr10	127985921	127986351
ELK1-Dam_1760	chr1	182862202	182862646
ELK1-Dam_1761	chr8	108461515	108461951
ELK1-Dam_1762	chr11	4077752	4078222
ELK1-Dam_1763	chr11	69499255	69499545
ELK1-Dam_1764	chr3	142057286	142057725
ELK1-Dam_1765	chr13	104898765	104899130
ELK1-Dam_1766	chr11	32434478	32435108
ELK1-Dam_1767	chr11	72019752	72020276
ELK1-Dam_1768	chr19	42687890	42688216
ELK1-Dam_1769	chr5	30482565	30482930
ELK1-Dam_1770	chr15	85037312	85037888
ELK1-Dam_1771	chr15	101115810	101116206
ELK1-Dam_1772	chr19	44180523	44180863
ELK1-Dam_1773	chr5	67651568	67651863
ELK1-Dam_1774	chr11	98245135	98245492
ELK1-Dam_1775	chr19	60866961	60867427
ELK1-Dam_1776	chr9	21396716	21397107
ELK1-Dam_1777	chr10	29082196	29082472
ELK1-Dam_1778	chr3	95497410	95497751
ELK1-Dam_1779	chr2	109858244	109858500
ELK1-Dam_1780	chr1	75358486	75358847
ELK1-Dam_1781	chr6	126889928	126890512
ELK1-Dam_1782	chr11	60622238	60622532
ELK1-Dam_1783	chr18	60787260	60787598
ELK1-Dam_1784	chr16	20610932	20611683
ELK1-Dam_1785	chr11	32127922	32128277
ELK1-Dam_1786	chr8	86223527	86223845
ELK1-Dam_1787	chr9	108470591	108470846
ELK1-Dam_1788	chr14	47380635	47380958
ELK1-Dam_1789	chr7	31423972	31424472
ELK1-Dam_1790	chr11	5050244	5050536
ELK1-Dam_1791	chr9	69303730	69304151
ELK1-Dam_1792	chr3	108457697	108458140
ELK1-Dam_1793	chr12	46173483	46174474
ELK1-Dam_1794	chr8	15012442	15012870
ELK1-Dam_1795	chr9	106378998	106379367
ELK1-Dam_1796	chr11	102145730	102146112
ELK1-Dam_1797	chr17	26650781	26651356
ELK1-Dam_1798	chr1	137626061	137626380
ELK1-Dam_1799	chr3	16084022	16084322
ELK1-Dam_1800	chr1	13399038	13399514
ELK1-Dam_1801	chr1	88419015	88419392
ELK1-Dam_1802	chr5	98462535	98462938
ELK1-Dam_1803	chr14	71059660	71059988
ELK1-Dam_1804	chr6	71861763	71862115
ELK1-Dam_1805	chr14	32026727	32026981
ELK1-Dam_1806	chr17	3558000	3558429
ELK1-Dam_1807	chr2	30213451	30213877
ELK1-Dam_1808	chr6	50212470	50213207
ELK1-Dam_1809	chr11	76218897	76219409
ELK1-Dam_1810	chr1	136130597	136131027
ELK1-Dam_1811	chr3	89576082	89576694
ELK1-Dam_1812	chr7	151797094	151797719
ELK1-Dam_1813	chr1	169154834	169155077
ELK1-Dam_1814	chr8	35170722	35171197
ELK1-Dam_1815	chr2	157392666	157393044
ELK1-Dam_1816	chr13	54667418	54667933
ELK1-Dam_1817	chr7	129225664	129225979
ELK1-Dam_1818	chr7	87342087	87342368
ELK1-Dam_1819	chr7	96784627	96785097
ELK1-Dam_1820	chr1	137621447	137621801
ELK1-Dam_1821	chr15	98467615	98467985
ELK1-Dam_1822	chr10	119639114	119639658
ELK1-Dam_1823	chr11	102957091	102957990
ELK1-Dam_1824	chr14	70496699	70497127
ELK1-Dam_1825	chr10	41194942	41195303
ELK1-Dam_1826	chr11	62060911	62061446
ELK1-Dam_1827	chr5	115637273	115637751
ELK1-Dam_1828	chr4	106323922	106324177
ELK1-Dam_1829	chr17	80690009	80690767
ELK1-Dam_1830	chr14	70946925	70947244
ELK1-Dam_1831	chr2	180064347	180064753
ELK1-Dam_1832	chr4	107634948	107635449
ELK1-Dam_1833	chr2	172843582	172844133
ELK1-Dam_1834	chrX	98728155	98728570
ELK1-Dam_1835	chr7	87679312	87679770
ELK1-Dam_1836	chr1	182946144	182946465
ELK1-Dam_1837	chr10	77003363	77003656
ELK1-Dam_1838	chr11	116296439	116296690
ELK1-Dam_1839	chr5	91328811	91329494
ELK1-Dam_1840	chr6	83074355	83074711
ELK1-Dam_1841	chr6	83456269	83456570
ELK1-Dam_1842	chr11	94939923	94941010
ELK1-Dam_1843	chr2	119979268	119979562
ELK1-Dam_1844	chr2	57089007	57089824
ELK1-Dam_1845	chr7	51693005	51693371
ELK1-Dam_1846	chr7	87680054	87680487
ELK1-Dam_1847	chr1	34908350	34908702
ELK1-Dam_1848	chr4	151731522	151731924
ELK1-Dam_1849	chr19	40587137	40587667
ELK1-Dam_1850	chr8	47061162	47061498
ELK1-Dam_1851	chr6	83740995	83741289
ELK1-Dam_1852	chr7	63218493	63218923
ELK1-Dam_1853	chr12	86311238	86312152
ELK1-Dam_1854	chr4	45120284	45120503
ELK1-Dam_1855	chr8	113370153	113370759
ELK1-Dam_1856	chr10	80753146	80753533
ELK1-Dam_1857	chr8	111239968	111240258
ELK1-Dam_1858	chr2	180923642	180923929
ELK1-Dam_1859	chr6	83058536	83059111
ELK1-Dam_1860	chr10	126600214	126600920
ELK1-Dam_1861	chr5	137734421	137734747
ELK1-Dam_1862	chr13	113450909	113451439
ELK1-Dam_1863	chr6	65619683	65619939
ELK1-Dam_1864	chr4	53177975	53178279
ELK1-Dam_1865	chr1	133241974	133242340
ELK1-Dam_1866	chr3	107949741	107950545
ELK1-Dam_1867	chr2	164266197	164266563
ELK1-Dam_1868	chr2	26299647	26299972
ELK1-Dam_1869	chr1	74284531	74284821
ELK1-Dam_1870	chr15	76709960	76710344
ELK1-Dam_1871	chr4	108507601	108507782
ELK1-Dam_1872	chr11	69137948	69138572
ELK1-Dam_1873	chr12	4234087	4234505
ELK1-Dam_1874	chr7	26179169	26179561
ELK1-Dam_1875	chr13	33055708	33056158
ELK1-Dam_1876	chr11	77981973	77982333
ELK1-Dam_1877	chr13	69680404	69680934
ELK1-Dam_1878	chr14	54877927	54878423
ELK1-Dam_1879	chr19	45088408	45088767
ELK1-Dam_1880	chr4	41516987	41517257
ELK1-Dam_1881	chr5	138226146	138226478
ELK1-Dam_1882	chr11	86497627	86498025
ELK1-Dam_1883	chr14	47379724	47380025
ELK1-Dam_1884	chr3	152009855	152010123
ELK1-Dam_1885	chr17	34087360	34088092
ELK1-Dam_1886	chr8	112218271	112218621
ELK1-Dam_1887	chr1	192735123	192735484
ELK1-Dam_1888	chr7	149655970	149656260
ELK1-Dam_1889	chr1	120403579	120404300
ELK1-Dam_1890	chr18	37966867	37967218
ELK1-Dam_1891	chr1	173052346	173053135
ELK1-Dam_1892	chr6	119124592	119124950
ELK1-Dam_1893	chr8	127187910	127188547
ELK1-Dam_1894	chr11	61728425	61728905
ELK1-Dam_1895	chr15	76095021	76095748
ELK1-Dam_1896	chr11	68792999	68793237
ELK1-Dam_1897	chr11	69484083	69484558
ELK1-Dam_1898	chr11	60728559	60729012
ELK1-Dam_1899	chr3	117569169	117569415
ELK1-Dam_1900	chr18	35014699	35014953
ELK1-Dam_1901	chr14	120721422	120722132
ELK1-Dam_1902	chr11	97851567	97852550
ELK1-Dam_1903	chr5	123220210	123220570
ELK1-Dam_1904	chr19	8893437	8893748
ELK1-Dam_1905	chr19	6932891	6933243
ELK1-Dam_1906	chr13	107811161	107811416
ELK1-Dam_1907	chr14	76152685	76153113
ELK1-Dam_1908	chr11	90111434	90111874
ELK1-Dam_1909	chr8	112089625	112090009
ELK1-Dam_1910	chr17	26813559	26814123
ELK1-Dam_1911	chr13	59922634	59923229
ELK1-Dam_1912	chr1	133242596	133242973
ELK1-Dam_1913	chr11	101844708	101845057
ELK1-Dam_1914	chr8	83260976	83261456
ELK1-Dam_1915	chr7	99786136	99786501
ELK1-Dam_1916	chr6	55069838	55070312
ELK1-Dam_1917	chr3	157699492	157700019
ELK1-Dam_1918	chr4	135698503	135699144
ELK1-Dam_1919	chr11	117685328	117685821
ELK1-Dam_1920	chr8	107900996	107901266
ELK1-Dam_1921	chr4	98588915	98589333
ELK1-Dam_1922	chr1	183782375	183782660
ELK1-Dam_1923	chr15	83394612	83395233
ELK1-Dam_1924	chrX	35953631	35953943
ELK1-Dam_1925	chr8	108519778	108520144
ELK1-Dam_1926	chr8	46495849	46496106
ELK1-Dam_1927	chr2	164688160	164688498
ELK1-Dam_1928	chr1	74839482	74839806
ELK1-Dam_1929	chr2	35996160	35996559
ELK1-Dam_1930	chr11	54335238	54335835
ELK1-Dam_1931	chr11	43648464	43648964
ELK1-Dam_1932	chr10	126761020	126761303
ELK1-Dam_1933	chr17	25960742	25961338
ELK1-Dam_1934	chr12	8213481	8213852
ELK1-Dam_1935	chr8	46418598	46418846
ELK1-Dam_1936	chr11	97196775	97197205
ELK1-Dam_1937	chr9	44205489	44205872
ELK1-Dam_1938	chr15	97608908	97609307
ELK1-Dam_1939	chr3	96066162	96066737
ELK1-Dam_1940	chr6	113392380	113392664
ELK1-Dam_1941	chr16	38346968	38347258
ELK1-Dam_1942	chr14	63858483	63858761
ELK1-Dam_1943	chr19	4059033	4059726
ELK1-Dam_1944	chr6	91065168	91065651
ELK1-Dam_1945	chr11	120409129	120409455
ELK1-Dam_1946	chr15	102180068	102180468
ELK1-Dam_1947	chr11	121098569	121099034
ELK1-Dam_1948	chr15	85642257	85642662
ELK1-Dam_1949	chr9	107884827	107885082
ELK1-Dam_1950	chr4	129301118	129301605
ELK1-Dam_1951	chr1	156993796	156994713
ELK1-Dam_1952	chr17	45910486	45911197
ELK1-Dam_1953	chr1	43225976	43226272
ELK1-Dam_1954	chr17	33917337	33917616
ELK1-Dam_1955	chr19	57430404	57430786
ELK1-Dam_1956	chr7	30979285	30979791
ELK1-Dam_1957	chr15	84687018	84687355
ELK1-Dam_1958	chr11	75344484	75344852
ELK1-Dam_1959	chr9	106061451	106062295
ELK1-Dam_1960	chr14	66455840	66456091
ELK1-Dam_1961	chr7	97129583	97130030
ELK1-Dam_1962	chr2	180008624	180009167
ELK1-Dam_1963	chr8	86239687	86240214
ELK1-Dam_1964	chr11	53114054	53114378
ELK1-Dam_1965	chr4	108505399	108505536
ELK1-Dam_1966	chr15	101835300	101836022
ELK1-Dam_1967	chr9	66362870	66363239
ELK1-Dam_1968	chr11	78566873	78567474
ELK1-Dam_1969	chr14	68332550	68332963
ELK1-Dam_1970	chr11	120329587	120329836
ELK1-Dam_1971	chr15	41700631	41700880
ELK1-Dam_1972	chr2	32236481	32236779
ELK1-Dam_1973	chr7	108449458	108449998
ELK1-Dam_1974	chr6	72473218	72473467
ELK1-Dam_1975	chr10	127547618	127547972
ELK1-Dam_1976	chr11	35584226	35584518
ELK1-Dam_1977	chr3	55985642	55986033
ELK1-Dam_1978	chr4	154623190	154623666
ELK1-Dam_1979	chr16	18052415	18052844
ELK1-Dam_1980	chr11	101034650	101035007
ELK1-Dam_1981	chr6	113569773	113570068
ELK1-Dam_1982	chr11	58773663	58774010
ELK1-Dam_1983	chr17	56359249	56359813
ELK1-Dam_1984	chr15	79154117	79154396
ELK1-Dam_1985	chr1	91000100	91000630
ELK1-Dam_1986	chr2	10000864	10001178
ELK1-Dam_1987	chr17	63846888	63847256
ELK1-Dam_1988	chr10	80707740	80708033
ELK1-Dam_1989	chr1	95584141	95584450
ELK1-Dam_1990	chr3	123147413	123147725
ELK1-Dam_1991	chr12	76770112	76770585
ELK1-Dam_1992	chr10	80065675	80066071
ELK1-Dam_1993	chr2	35351806	35352109
ELK1-Dam_1994	chr5	92819276	92819563
ELK1-Dam_1995	chr6	124323767	124324128
ELK1-Dam_1996	chr7	106681098	106681550
ELK1-Dam_1997	chr12	76411511	76411786
ELK1-Dam_1998	chr1	75517741	75518059
ELK1-Dam_1999	chr11	96711557	96712003
[truncated: 104 more rows]

## Sheet: 7 - ELK1
peak	chromosome	start	end	gene
ELK1_1	chr1	9534915	9535541	Adhfe1 (-2899), Rrs1 (-261)
ELK1_2	chr1	16094337	16095082	Rdh10 (-1253), Rpl7 (-196)
ELK1_3	chr1	30824297	30824953	Phf3 (+95476)
ELK1_4	chr1	33725521	33726216	Prim2 (+734)
ELK1_5	chr1	34496183	34496830	Imp4 (-167), Ccdc115 (+10)
ELK1_6	chr1	34908350	34908702	Plekhb2 (+1722)
ELK1_7	chr1	36603245	36604382	Ankrd39 (+232)
ELK1_8	chr1	38053872	38054632	Eif5b (-603), Txndc9 (-199)
ELK1_9	chr1	52176614	52177065	Stat1 (+558)
ELK1_10	chr1	58087080	58087675	Aox1 (+565)
ELK1_11	chr1	58501931	58502905	Nif3l1 (-2060), Ppil3 (-88)
ELK1_12	chr1	63161228	63163501	Ino80d (-1524)
ELK1_13	chr1	66908556	66909333	Acadl (+896)
ELK1_14	chr1	74169654	74170187	Rufy4 (-2194), Tns1 (+1100)
ELK1_15	chr1	74177445	74178409	Cxcr2 (-22641), Rufy4 (+5812)
ELK1_16	chr1	74410607	74411187	Gm216 (+2215)
ELK1_17	chr1	74839446	74839995	Wnt10a (+1128)
ELK1_18	chr1	75217992	75218399	Tuba4a (-2368)
ELK1_19	chr1	82313522	82313999	Rhbdd1 (+607)
ELK1_20	chr1	84836104	84836552	Trip12 (-449), Fbxo36 (-88)
ELK1_21	chr1	87691000	87691628	Cab39 (+1292)
ELK1_22	chr1	90968121	90968438	Sh3bp4 (+1243)
ELK1_23	chr1	91000100	91000630	Sh3bp4 (+33328)
ELK1_24	chr1	92847089	92848656	Rab17 (+16371), Mlph (+36196)
ELK1_25	chr1	92850725	92851117	Rab17 (+13323), Mlph (+39244)
ELK1_26	chr1	92865304	92865897	Rab17 (-1357)
ELK1_27	chr1	94544125	94544911	Myeov2 (-5956), Otos (+900)
ELK1_28	chr1	94830443	94830873	Capn10 (-327)
ELK1_29	chr1	95584141	95584450	Bok (+2025)
ELK1_30	chr1	95698171	95699097	Ing5 (-1908), Dtymk (-123)
ELK1_31	chr1	108439826	108440938	NONE
ELK1_32	chr1	120208652	120209067	Tsn (-1151)
ELK1_33	chr1	120218855	120219909	Mki67ip (+962)
ELK1_34	chr1	120403471	120404300	NONE
ELK1_35	chr1	127330924	127331485	Actr3 (+862)
ELK1_36	chr1	129572109	129573105	Tmem163 (+1991)
ELK1_37	chr1	133904976	133906049	Elk4 (+1331)
ELK1_38	chr1	134175902	134176621	Klhdc8a (-18941), Lemd1 (+88249)
ELK1_39	chr1	134213436	134214486	Nuak2 (+1259)
ELK1_40	chr1	135028523	135030337	Ppp1r15b (+1687)
ELK1_41	chr1	135805336	135806239	Optc (-2038)
ELK1_42	chr1	135979893	135981182	Btg2 (-4806)
ELK1_43	chr1	136129537	136131027	Adora1 (+1726)
ELK1_44	chr1	136257412	136257703	Tmem183a (+1018)
ELK1_45	chr1	136390378	136391258	Rabif (-419)
ELK1_46	chr1	137616250	137616783	Csrp1 (-9257)
ELK1_47	chr1	137625948	137626419	Csrp1 (+410)
ELK1_48	chr1	140859676	140860005	Dennd1b (-445)
ELK1_49	chr1	153417856	153418139	Fam129a (-505)
ELK1_50	chr1	153603231	153604109	Edem3 (+1166)
ELK1_51	chr1	154470318	154471479	Rgl1 (+1342)
ELK1_52	chr1	155038311	155038997	Lamc2 (-5077), Lamc2 (-5077)
ELK1_53	chr1	155595207	155596439	Rnasel (-733)
ELK1_54	chr1	156992793	156993067	Mr1 (+980)
ELK1_55	chr1	156993796	156994713	Mr1 (-345)
ELK1_56	chr1	157404588	157404928	Acbd6 (-492)
ELK1_57	chr1	167635848	167636543	Rcsd1 (+2029)
ELK1_58	chr1	168338625	168339357	Pogk (+968)
ELK1_59	chr1	169154755	169155213	Uck2 (+60274)
ELK1_60	chr1	173084369	173084927	Sdhc (-3914), Mpz (+3804)
ELK1_61	chr1	173165122	173165668	Fcer1g (-915)
ELK1_62	chr1	173342098	173342853	Usf1 (+664)
ELK1_63	chr1	173433370	173434321	Refbp2 (+237)
ELK1_64	chr1	174012863	174013640	Ncstn (-372), Copa (+592)
ELK1_65	chr1	174241049	174241952	Igsf8 (-1037)
ELK1_66	chr1	174306459	174306858	Pigm (-3)
ELK1_67	chr1	174425203	174425661	Tagln2 (-4945)
ELK1_68	chr1	177420437	177420769	Rgs7 (+2073)
ELK1_69	chr1	178748334	178748981	Sdccag8 (+3715)
ELK1_70	chr1	182499882	182500942	Parp1 (+1306)
ELK1_71	chr1	182862167	182862886	Lefty1 (-2643)
ELK1_72	chr1	182946144	182946529	Ephx1 (+1289)
ELK1_73	chr1	183782375	183782770	Lbr (-10041)
ELK1_74	chr1	184447949	184448532	Capn2 (-627)
ELK1_75	chr1	184448915	184449450	Capn2 (-1569)
ELK1_76	chr1	184449908	184450556	Capn2 (-2618)
ELK1_77	chr1	192735736	192736542	Rps6kc1 (-490)
ELK1_78	chr1	193816397	193816914	Rd3 (+15402), Traf5 (+99789)
ELK1_79	chr10	5955863	5956318	Zbtb2 (-2342)
ELK1_80	chr10	18127137	18127776	Nhsl1 (-62330)
ELK1_81	chr10	30523808	30524158	Ncoa7 (-1070)
ELK1_82	chr10	34002517	34003006	Tspyl1 (+766)
ELK1_83	chr10	41193382	41194097	Mical1 (-2380)
ELK1_84	chr10	41194942	41195303	Mical1 (-997)
ELK1_85	chr10	41237678	41238686	Cd164 (-1124)
ELK1_86	chr10	43867450	43868027	NONE
ELK1_87	chr10	60914209	60914628	Eif4ebp2 (+998)
ELK1_88	chr10	61710365	61711387	Tacr2 (-4310)
ELK1_89	chr10	66745742	66747168	Nrbf2 (+1574)
ELK1_90	chr10	66999695	67000804	Egr2 (-367)
ELK1_91	chr10	68991790	68992484	Ank3 (-4319)
ELK1_92	chr10	77472734	77473461	Pfkl (-557)
ELK1_93	chr10	77887979	77888406	Cstb (-222)
ELK1_94	chr10	78037775	78038499	Ilvbl (+892)
ELK1_95	chr10	78057705	78058356	Syde1 (-3322)
ELK1_96	chr10	79314348	79315121	Ptbp1 (-2615)
ELK1_97	chr10	79460027	79460441	Abca7 (-126)
ELK1_98	chr10	79689821	79690572	Mum1 (+854)
ELK1_99	chr10	79760655	79760952	Apc2 (-3761)
ELK1_100	chr10	79896571	79896960	Tcf3 (-368)
ELK1_101	chr10	80086329	80086865	Csnk1g2 (-5804)
ELK1_102	chr10	80261000	80261397	Sf3a2 (-281), Plekhj1 (+172)
ELK1_103	chr10	80505553	80505964	Slc39a3 (-9081), Sgta (+17140)
ELK1_104	chr10	80630655	80631909	Pias4 (-817)
ELK1_105	chr10	80707564	80708099	Matk (-12458), Zfr2 (+11924)
ELK1_106	chr10	80753146	80753533	Pip5k1c (-2377), Tjp3 (+672)
ELK1_107	chr10	80847105	80847550	Fzr1 (-6213), Dohh (+155)
ELK1_108	chr10	81090060	81090506	Ankrd24 (-1002), Sirt6 (+70)
ELK1_109	chr10	82415275	82416045	Chst11 (-32582), Eid3 (+86289)
ELK1_110	chr10	83994460	83995618	Ckap4 (+1594)
ELK1_111	chr10	86118709	86119326	Hsp90b1 (+49171)
ELK1_112	chr10	92624928	92625604	Cdk17 (+1645)
ELK1_113	chr10	93002993	93003558	Amdhd1 (-498), Ccdc38 (-101)
ELK1_114	chr10	98722324	98724094	Dusp6 (-2656)
ELK1_115	chr10	117230070	117230585	Nup107 (-567)
ELK1_116	chr10	119639114	119639771	Tmbim4 (-6439), Irak3 (-850)
ELK1_117	chr10	120196935	120197665	NONE
ELK1_118	chr10	120910936	120912299	Rassf3 (+1688)
ELK1_119	chr10	126507237	126507826	Tspan31 (-215)
ELK1_120	chr10	126631619	126632158	Arhgef25 (-4779), Dtx3 (+876)
ELK1_121	chr10	126760307	126761339	Arhgap9 (+40)
ELK1_122	chr10	127530570	127531444	Baz2a (+1491)
ELK1_123	chr10	127547510	127548154	Baz2a (+18316), Rbms2 (+65792)
ELK1_124	chr10	127648089	127648574	Spryd4 (+518)
ELK1_125	chr10	127846996	127848160	Rnf41 (-1094), Obfc2b (-726)
ELK1_126	chr10	127929870	127930521	Myl6 (+685)
ELK1_127	chr10	128359150	128361007	Rdh5 (-3726), Bloc1s1 (+501)
ELK1_128	chr11	4022469	4024708	Sec14l2 (-4857)
ELK1_129	chr11	4748340	4748951	Nf2 (+884)
ELK1_130	chr11	5050244	5050646	Emid1 (+1780)
ELK1_131	chr11	5689043	5689968	Dbnl (+1020)
ELK1_132	chr11	5855959	5856250	Ykt6 (+344)
ELK1_133	chr11	6445788	6446220	Ccm2 (-886)
ELK1_134	chr11	19819587	19820349	Spred2 (-4477)
ELK1_135	chr11	22742396	22743142	B3gnt2 (+17567)
ELK1_136	chr11	29071919	29072829	Smek2 (-533)
ELK1_137	chr11	29447981	29448733	Rps27a (-317), 1700034F02Rik (+407)
ELK1_138	chr11	31772476	31772912	Cpeb4 (+483)
ELK1_139	chr11	32125415	32126074	Rhbdf1 (-3452), Mpg (-760)
ELK1_140	chr11	32434478	32435108	Stk10 (+1527)
ELK1_141	chr11	40505351	40505708	Mat2b (+654)
ELK1_142	chr11	43514131	43514728	Pwwp2a (+18930), Ttc1 (+47045)
ELK1_143	chr11	43564700	43565119	Ttc1 (-3435)
ELK1_144	chr11	45757270	45757842	Lsm11 (+881)
ELK1_145	chr11	48612766	48614991	Gnb2l1 (+17)
ELK1_146	chr11	50103866	50104976	Maml1 (+1417)
ELK1_147	chr11	51661741	51662890	Phf15 (+8667), Sar1b (+85151)
ELK1_148	chr11	53114023	53114973	Hspa4 (-517)
ELK1_149	chr11	53591347	53591831	Irf1 (+8073)
ELK1_150	chr11	53914981	53915463	P4ha2 (+796)
ELK1_151	chr11	54680731	54681564	Hint1 (+1208)
ELK1_152	chr11	55273270	55274612	Atox1 (+699)
ELK1_153	chr11	55283773	55284508	G3bp1 (+887)
ELK1_154	chr11	55852553	55852864	Nmur2 (+1780)
ELK1_155	chr11	59283580	59283955	Zfp867 (+2208)
ELK1_156	chr11	59653387	59654355	Cops3 (-602)
ELK1_157	chr11	59778116	59779370	Rasd1 (-299)
ELK1_158	chr11	59780661	59781816	Rasd1 (-2795)
ELK1_159	chr11	60540948	60541767	Flii (-635), Smcr7 (-542)
ELK1_160	chr11	60590570	60592334	Top3a (-585), Smcr8 (+425)
ELK1_161	chr11	60622238	60622563	Shmt1 (+2366)
ELK1_162	chr11	60644424	60645023	Dhrs7b (+591)
ELK1_163	chr11	60745985	60746568	Map2k3 (+718)
ELK1_164	chr11	60748281	60749871	Map2k3 (+3517)
ELK1_165	chr11	60874963	60875567	Kcnj12 (-4041)
ELK1_166	chr11	61082055	61082886	Aldh3a2 (-1842)
ELK1_167	chr11	61308702	61309754	Mapk7 (-1523)
ELK1_168	chr11	61728425	61728905	Ulk2 (-60071), Akap10 (+15063)
ELK1_169	chr11	62271682	62272496	Ncor1 (-1255), Pigl (+127)
ELK1_170	chr11	65619877	65620529	Zkscan6 (-543)
ELK1_171	chr11	67733949	67734391	Usp43 (+1485)
ELK1_172	chr11	68666749	68668374	Ndel1 (-929)
ELK1_173	chr11	68792963	68793237	Rangrf (-5778)
ELK1_174	chr11	68853148	68854076	Aurkb (-5533)
ELK1_175	chr11	68854392	68855294	Aurkb (-4302)
ELK1_176	chr11	68859319	68859958	Aurkb (+494)
ELK1_177	chr11	68884827	68886006	Tmem107 (+1106)
ELK1_178	chr11	68886366	68886784	Tmem107 (+2264)
ELK1_179	chr11	68910899	68913422	Per1 (-1499)
ELK1_180	chr11	69137767	69138603	Kcnab3 (-1575), Cntrob (-810), Trappc1 (+697)
ELK1_181	chr11	69208415	69209316	Lsmd1 (-427), Cyb5d1 (-18)
ELK1_182	chr11	69223669	69224107	Tmem88 (-12152), Kdm6b (+3287)
ELK1_183	chr11	69364657	69365085	Dnahc2 (-2261)
ELK1_184	chr11	69394547	69395294	Wrap53 (-2095), Trp53 (+1060)
ELK1_185	chr11	69436264	69436956	Shbg (-5203), Sat2 (+999)
ELK1_186	chr11	69484083	69484558	Cd68 (-4757), Eif4a1 (+1604)
ELK1_187	chr11	69651719	69652125	Nlgn2 (-3571), 1810027O10Rik (-105)
ELK1_188	chr11	69808491	69809078	Dvl2 (-5343), Phf23 (-488)
ELK1_189	chr11	70246540	70247180	Arrb2 (+705)
ELK1_190	chr11	70376960	70377914	Mink1 (+1054)
ELK1_191	chr11	70460779	70462411	Slc25a11 (-1100), Rnf167 (+504)
ELK1_192	chr11	70465851	70466709	Slc25a11 (-5785), Eno3 (-4435), Pfn1 (+1872)
ELK1_193	chr11	72019752	72020347	4933427D14Rik (-3177), Txndc17 (-1006)
ELK1_194	chr11	72861803	72863144	1200014J11Rik (+1105)
ELK1_195	chr11	72950259	72950946	Gsg2 (+1193)
ELK1_196	chr11	72957100	72957748	Gsg2 (-5628)
ELK1_197	chr11	75300663	75301362	Prpf8 (+734)
ELK1_198	chr11	75399159	75399963	Pitpna (-2049)
ELK1_199	chr11	75465471	75467236	Myo1c (-3163)
ELK1_200	chr11	76212948	76213734	Nxn (-698)
ELK1_201	chr11	76218897	76219449	Timm22 (-1496)
ELK1_202	chr11	76324460	76324819	Abr (-1719)
ELK1_203	chr11	77307824	77308303	Ankrd13b (-4884), Git1 (+1150)
ELK1_204	chr11	77327140	77327979	Abhd15 (-1059), Trp53i13 (-785)
ELK1_205	chr11	77843620	77845384	Dhrs13 (-1313)
ELK1_206	chr11	77929446	77930119	BC017647 (+21608), Traf4 (+49269)
ELK1_207	chr11	77979704	77980162	Traf4 (-881)
ELK1_208	chr11	77981973	77982333	Traf4 (-3101)
ELK1_209	chr11	77989643	77989953	Tlcd1 (-660), Nek8 (+370)
ELK1_210	chr11	77992729	77993589	Nek8 (-2991), Tlcd1 (+2701)
ELK1_211	chr11	78135561	78137267	Pigs (-5510), Aldoc (-1286)
ELK1_212	chr11	78158567	78159464	Unc119 (+1992)
ELK1_213	chr11	78324997	78325500	Poldip2 (-549), Tmem199 (+421)
ELK1_214	chr11	78515675	78516136	Nlk (-4979)
ELK1_215	chr11	78566598	78567516	Fam58b (-1826)
ELK1_216	chr11	79100236	79101529	Nf1 (-52511), Wsb1 (-32686)
ELK1_217	chr11	79775792	79776367	Utp6 (-191)
ELK1_218	chr11	80620730	80621206	Tmem98 (-2949)
ELK1_219	chr11	82683928	82684449	Rffl (+523)
ELK1_220	chr11	83001530	83002363	Slfn3 (-2885)
ELK1_221	chr11	83242426	83242735	Gas2l2 (+376)
ELK1_222	chr11	84336257	84337444	Lhx1 (+2185)
ELK1_223	chr11	88717496	88718567	Akap1 (+7868)
ELK1_224	chr11	88922489	88923407	Dgke (-603)
ELK1_225	chr11	93828973	93830215	Nme1 (+241)
ELK1_226	chr11	94336446	94337278	Cacna1g (-1350)
ELK1_227	chr11	94515061	94515351	Eme1 (-138), Mrpl27 (+101)
ELK1_228	chr11	94851333	94852059	Ppp1r9b (-830)
ELK1_229	chr11	94853844	94855227	Ppp1r9b (+2010)
ELK1_230	chr11	94869103	94870070	Samd14 (-1606)
ELK1_231	chr11	94870736	94871200	Samd14 (-225)
ELK1_232	chr11	94928384	94929200	Pdk2 (-26107), Itga3 (+9236)
ELK1_233	chr11	94939923	94941080	Itga3 (-2474)
ELK1_234	chr11	95122080	95122705	Tac4 (-450)
ELK1_235	chr11	95171541	95172231	Myst2 (-326)
ELK1_236	chr11	95377053	95377586	Nxph3 (-1441)
ELK1_237	chr11	96651674	96652365	Cbx1 (+1570)
ELK1_238	chr11	96849391	96850093	Sp6 (-25141), Sp2 (-10740)
ELK1_239	chr11	97642642	97643522	1700001P01Rik (-5850), Rpl23 (+671)
ELK1_240	chr11	97702244	97703519	Lasp1 (+41896), Fbxo47 (+42586)
ELK1_241	chr11	97860952	97861456	Arl5c (-3717)
ELK1_242	chr11	98218749	98219458	Stard3 (-594)
ELK1_243	chr11	98220024	98220975	Stard3 (+802)
ELK1_244	chr11	98245061	98245595	Pnmt (-2618), Tcap (+203)
ELK1_245	chr11	98491978	98492633	Gsdma2 (-15767), Gsdma3 (+4632)
ELK1_246	chr11	98602086	98602717	Thra (-785)
ELK1_247	chr11	98635666	98636689	Nr1d1 (+378)
ELK1_248	chr11	98847151	98847788	Gjd3 (-3140)
ELK1_249	chr11	100483896	100484668	Dnajc7 (-2800), Nkiras2 (+13)
ELK1_250	chr11	100512482	100513095	Zfp385c (-782)
ELK1_251	chr11	101303993	101304649	Ifi35 (-5405), Rpl27 (+762)
ELK1_252	chr11	101441161	101442306	Tmem106a (-1822)
ELK1_253	chr11	101969731	101970740	Pyy (-1146)
ELK1_254	chr11	102158925	102159565	Atxn7l3 (-1302)
ELK1_255	chr11	102747558	102748117	Eftud2 (-5549), Fam187a (+1355)
ELK1_256	chr11	102957017	102958059	Acbd4 (-5464), Plcd3 (+5434)
ELK1_257	chr11	104467921	104468776	Itgb3 (-965)
ELK1_258	chr11	105808005	105808648	Cyb561 (-2866)
ELK1_259	chr11	107407059	107407699	Helz (-1895)
ELK1_260	chr11	113511584	113512444	Cog1 (+1171)
ELK1_261	chr11	115264861	115265223	Ict1 (-38)
ELK1_262	chr11	115761753	115763076	2210020M01Rik (+962)
ELK1_263	chr11	115874379	115874863	Galk1 (-588)
ELK1_264	chr11	115969602	115970336	Trim47 (+1361)
ELK1_265	chr11	116296439	116296690	Fam100b (+1157)
ELK1_266	chr11	117001496	117002016	Sept9 (-59219), Sec14l1 (+25270)
ELK1_267	chr11	117658896	117659322	6030468B19Rik (+135)
ELK1_268	chr11	117684039	117684506	Afmid (-2960)
ELK1_269	chr11	117860530	117860881	Pgs1 (+12535)
ELK1_270	chr11	118115373	118115729	Cyth1 (-41495), Usp36 (+36007)
ELK1_271	chr11	118221908	118222318	Timp2 (-5388)
ELK1_272	chr11	119775542	119776638	Chmp6 (+966)
ELK1_273	chr11	119959942	119960961	2410002I01Rik (-407), 1810043H04Rik (+204)
ELK1_274	chr11	120042845	120043684	Bahcc1 (-50996), Slc38a10 (-30600)
ELK1_275	chr11	120578255	120579731	Stra13 (-3912), Rac3 (-3789)
ELK1_276	chr11	121098502	121099071	Narf (+237)
ELK1_277	chr12	3235128	3235517	Rab10 (+74646)
ELK1_278	chr12	3887981	3889526	Pomc (-66197), Dnmt3a (+81774)
ELK1_279	chr12	8320661	8320941	Hs1bp3 (+562)
ELK1_280	chr12	8680050	8680663	Pum2 (-708)
ELK1_281	chr12	9037237	9037708	Ttc32 (+670)
ELK1_282	chr12	16899763	16900711	Rock2 (-1547)
ELK1_283	chr12	17005724	17007032	Pqlc3 (+546)
ELK1_284	chr12	21292615	21293326	Itgb1bp1 (-873), Cpsf3 (+813)
ELK1_285	chr12	31269473	31270582	Tmem18 (+720)
ELK1_286	chr12	35732930	35733394	Snx13 (+1301)
ELK1_287	chr12	36883649	36884761	Bzw2 (-793), Ankmy2 (+494)
ELK1_288	chr12	41173614	41175492	Zfp277 (-2176), Dock4 (+1913)
ELK1_289	chr12	45370621	45371594	Pnpla8 (+967)
ELK1_290	chr12	56593988	56594840	Nfkbia (-780)
ELK1_291	chr12	76411370	76411891	Rhoj (+2331)
ELK1_292	chr12	76770112	76770740	Wdr89 (+98)
ELK1_293	chr12	80272477	80273030	Vti1b (+691)
ELK1_294	chr12	82633657	82634006	Synj2bp (+62)
ELK1_295	chr12	82958343	82959150	Pcnx (-2270)
ELK1_296	chr12	83267384	83267981	NONE
ELK1_297	chr12	83358784	83359534	Sipa1l1 (-53177)
ELK1_298	chr12	85626218	85627374	Ptgr2 (+532)
ELK1_299	chr12	86311238	86312152	Fcf1 (-185), 1110018G07Rik (+141)
ELK1_300	chr12	86814673	86815365	Fos (+168)
ELK1_301	chr12	87423156	87424193	Tgfb3 (-3684), 1700019E19Rik (+164)
ELK1_302	chr12	88541414	88542404	Tmed8 (-730)
ELK1_303	chr12	88783090	88783566	1810035L17Rik (-1518), Alkbh1 (+1461), Nrp (+1639)
ELK1_304	chr12	92828840	92829563	Gtf2a1 (-1113)
ELK1_305	chr12	106246227	106246951	Glrx5 (-24310), 4831426I19Rik (-9702)
ELK1_306	chr12	106795395	106796179	Bdkrb2 (-5595)
ELK1_307	chr12	109607954	109609121	Eml1 (-52488), Cyp46a1 (+35947)
ELK1_308	chr12	111723155	111724704	Ppp2r5c (-19)
ELK1_309	chr12	112616736	112617298	Cdc42bpb (-1088)
ELK1_310	chr12	113832228	113834207	Adssl1 (-25040), Inf2 (+6223)
ELK1_311	chr12	113853436	113854482	Adssl1 (-4299)
ELK1_312	chr12	113854922	113856194	Adssl1 (-2700)
ELK1_313	chr12	113959069	113960278	AW555464 (-711)
ELK1_314	chr12	114103570	114105092	Gpr132 (-5204)
ELK1_315	chr12	114180733	114181301	Nudt14 (-688)
ELK1_316	chr12	114250933	114251923	Pacs2 (-1291)
ELK1_317	chr12	114313372	114314325	Tex22 (+1136)
ELK1_318	chr12	114379300	114379733	Crip2 (+1070)
ELK1_319	chr12	114392233	114393760	4930427A07Rik (-1635)
ELK1_320	chr12	119080491	119080795	Cdca7l (-1691)
ELK1_321	chr13	6645883	6646352	Pfkp (+1852)
ELK1_322	chr13	14131705	14132227	Tbce (-99)
ELK1_323	chr13	17786883	17787219	5033411D12Rik (-452), 2810021B07Rik (-196)
ELK1_324	chr13	21544662	21545610	Zfp187 (+460)
ELK1_325	chr13	46597939	46598914	Cap2 (+1155)
ELK1_326	chr13	47138268	47138530	Kdm1b (-509), Tpmt (+187)
ELK1_327	chr13	49402359	49402721	Fgd3 (+2037)
ELK1_328	chr13	55121903	55123488	Hk3 (-1)
ELK1_329	chr13	55257135	55257605	Nsd1 (-53773), Fgfr4 (+3191)
ELK1_330	chr13	55423382	55424833	Rab24 (-767), Prelid1 (+692)
ELK1_331	chr13	58259399	58259959	5133401N09Rik (+669)
ELK1_332	chr13	59758004	59758723	Golm1 (+18781), Naa35 (+71670)
ELK1_333	chr13	59769977	59770700	Golm1 (+6806), Naa35 (+83645)
ELK1_334	chr13	73605739	73606125	Lpcat1 (+1101)
ELK1_335	chr13	81848507	81849643	Mblac2 (-1341), Polr3g (+937)
ELK1_336	chr13	91063603	91063892	Gm15450 (+1021)
ELK1_337	chr13	92016487	92016951	Ckmt2 (-229)
ELK1_338	chr13	93380222	93380580	Serinc5 (-692)
ELK1_339	chr13	94074792	94075126	Homer1 (+509)
ELK1_340	chr13	104898765	104899164	Sgtb (-905), Nln (+729)
ELK1_341	chr13	105017681	105018627	Cenpk (-1314), Ppwd1 (+770)
ELK1_342	chr13	107811161	107811492	Kif2a (+867)
ELK1_343	chr13	113450909	113451439	Slc38a9 (+200)
ELK1_344	chr13	113844595	113844984	Gpx8 (-8194), Gzma (+46399)
ELK1_345	chr13	114406263	114406661	Snx18 (+2310)
ELK1_346	chr14	12384000	12384761	Ptprg (-1686)
ELK1_347	chr14	21167836	21168479	Ecd (-815), Fam149b (+774)
ELK1_348	chr14	21493865	21495044	Sec24c (+912)
ELK1_349	chr14	26512007	26513241	Ppif (-1032)
ELK1_350	chr14	26514380	26515486	Ppif (+1277)
ELK1_351	chr14	27487284	27488650	Pde12 (+1365)
ELK1_352	chr14	31439761	31440451	Prkcd (-712)
ELK1_353	chr14	32008082	32008875	Stab1 (-26652), Nisch (+11533)
ELK1_354	chr14	32137502	32138048	Dnahc1 (-693)
ELK1_355	chr14	32150353	32151089	Capn7 (+811)
ELK1_356	chr14	32898100	32899844	Dph3 (-121), Oxnad1 (+58)
ELK1_357	chr14	47379724	47380056	Cdkn3 (-326)
ELK1_358	chr14	47504141	47504568	Samd4 (+1715)
ELK1_359	chr14	47690155	47690825	NONE
ELK1_360	chr14	51543256	51543841	Apex1 (-1147), Osgep (+1019)
ELK1_361	chr14	54873326	54873798	Abhd4 (-5410), Dad1 (+42)
ELK1_362	chr14	54877927	54878532	Dad1 (-4626), Abhd4 (-742)
ELK1_363	chr14	55035865	55036289	Slc7a7 (+459)
ELK1_364	chr14	55044649	55046142	Mmp14 (-5045), Mrpl52 (-350)
ELK1_365	chr14	55261956	55262660	Cdh24 (-2107)
ELK1_366	chr14	55556363	55557240	Cmtm5 (+1495)
ELK1_367	chr14	55583700	55584622	Myh6 (+1283)
ELK1_368	chr14	55633434	55634502	Ngdn (-323)
ELK1_369	chr14	55723617	55724502	Ap1g2 (+1370)
ELK1_370	chr14	56195688	56196845	Psme1 (-1064), Fitm1 (+1756)
ELK1_371	chr14	57194556	57195031	Cenpj (-4111), Parp4 (+338)
ELK1_372	chr14	60870479	60871208	Nupl1 (-629)
ELK1_373	chr14	63380665	63381520	Ints6 (-1144)
ELK1_374	chr14	63741937	63743109	Ctsb (+1221)
ELK1_375	chr14	63752217	63752600	Ctsb (+11107), Fdft1 (+44919)
ELK1_376	chr14	66914884	66915572	Trim35 (-634)
ELK1_377	chr14	70205535	70206762	Rhobtb2 (-797)
ELK1_378	chr14	70472958	70474223	Egr3 (-3661)
ELK1_379	chr14	70501090	70501775	Bin3 (+1481)
ELK1_380	chr14	70556628	70557070	2610301G19Rik (-3251), 9930012K11Rik (+2460)
ELK1_381	chr14	70998596	70999105	Fam160b2 (+791)
ELK1_382	chr14	71033732	71034258	Epb4.9 (-4034)
ELK1_383	chr14	71058761	71059988	Npm2 (-6484)
ELK1_384	chr14	76157997	76158539	Cog3 (-3968)
ELK1_385	chr14	76410692	76411185	Gtf2f2 (-267)
ELK1_386	chr14	102127814	102128136	Lmo7 (-1170)
ELK1_387	chr14	104920742	104921284	Rnf219 (+870)
ELK1_388	chr14	120721085	120722168	Mbnl2 (+46736)
ELK1_389	chr15	5058003	5058852	Card6 (+105)
ELK1_390	chr15	5066455	5066786	Rpl37 (+8)
ELK1_391	chr15	9003425	9003892	1110020G09Rik (+2650), Skp2 (+66548)
ELK1_392	chr15	10415410	10415701	Rad1 (-233), Brix1 (+136)
ELK1_393	chr15	31154499	31155303	Dap (+761)
ELK1_394	chr15	32343922	32345194	NONE
ELK1_395	chr15	35866717	35867351	Cox6c (+967)
ELK1_396	chr15	36721297	36722409	Ywhaz (+2440)
ELK1_397	chr15	57966763	57967179	Wdyhv1 (-6020), Atad2 (-334)
ELK1_398	chr15	68755570	68756688	Khdrbs3 (-2721)
ELK1_399	chr15	68757796	68758706	Khdrbs3 (-599)
ELK1_400	chr15	72890622	72891046	Trappc9 (+800)
ELK1_401	chr15	72977678	72978967	Eif2c2 (+37054), Chrac1 (+57481)
ELK1_402	chr15	73574899	73576257	Ptp4a3 (+22003), Gm628 (+94523)
ELK1_403	chr15	74508201	74508930	Arc (-5566)
ELK1_404	chr15	74550657	74551221	4930572J05Rik (-725)
ELK1_405	chr15	75759145	75760190	Tsta3 (+492)
ELK1_406	chr15	76180094	76181319	Maf1 (-1017), Sharpin (+833)
ELK1_407	chr15	76190246	76191340	Brp16 (-8535), Maf1 (+9069)
ELK1_408	chr15	76455509	76456553	Vps28 (+426)
ELK1_409	chr15	76525355	76526925	Mfsd3 (-5832), Gpt (-1054)
ELK1_410	chr15	76553413	76555024	Lrrc24 (-1616), C030006K11Rik (+56)
ELK1_411	chr15	76709892	76710380	Zfp7 (+430)
ELK1_412	chr15	76885119	76885624	Mb (-4274)
ELK1_413	chr15	78003436	78003714	Ift27 (+963)
ELK1_414	chr15	78254640	78255142	Kctd17 (-4167)
ELK1_415	chr15	78359010	78359560	C1qtnf6 (+796)
ELK1_416	chr15	78706610	78707232	Gga1 (-699)
ELK1_417	chr15	78870463	78870925	Galr3 (-1621)
ELK1_418	chr15	78940302	78941168	Micall1 (+1322)
ELK1_419	chr15	80085305	80085676	Atf4 (-123)
ELK1_420	chr15	80217194	80217550	Cacna1i (+99704)
ELK1_421	chr15	81687372	81688373	Tob2 (+883)
ELK1_422	chr15	81893393	81893827	Mei1 (-6937), 4930407I10Rik (+4029)
ELK1_423	chr15	81894208	81895427	Mei1 (-5729)
ELK1_424	chr15	81976480	81977318	Srebf2 (-800)
ELK1_425	chr15	83002559	83003521	Cyb5r3 (-402)
ELK1_426	chr15	84866000	84866936	Fam118a (-1024)
ELK1_427	chr15	85037171	85037927	Fbln1 (+1111)
ELK1_428	chr15	89006424	89007162	Plxnb2 (-2513)
ELK1_429	chr15	89040301	89041223	Ppp6r2 (-1228)
ELK1_430	chr15	91503993	91504617	Lrrk2 (+650)
ELK1_431	chr15	97082992	97083497	Amigo2 (-5527)
ELK1_432	chr15	97608908	97609419	Slc48a1 (-5632)
ELK1_433	chr15	98463689	98464081	Cacnb3 (-1310)
ELK1_434	chr15	98467505	98467985	Cacnb3 (+2550), Ddx23 (+25575)
ELK1_435	chr15	98559038	98559676	Fkbp11 (-728)
ELK1_436	chr15	98860761	98861455	Tuba1c (+786)
ELK1_437	chr15	99082299	99083280	Mcrs1 (-398)
ELK1_438	chr15	99360993	99361683	Faim2 (-2890)
ELK1_439	chr15	99362299	99362701	Faim2 (-4052)
ELK1_440	chr15	99479541	99480331	Racgap1 (+2116)
ELK1_441	chr15	99484351	99485248	Racgap1 (-2748)
ELK1_442	chr15	101091328	101091906	Nr4a1 (-5660)
ELK1_443	chr15	101203088	101203549	Krt80 (-2763)
ELK1_444	chr15	101835075	101836122	Krt8 (-826)
ELK1_445	chr15	101932152	101933032	Tenc1 (-827)
ELK1_446	chr15	102033099	102033660	Zfp740 (-5323)
ELK1_447	chr15	102034806	102035528	Zfp740 (-3536)
ELK1_448	chr15	103090430	103090891	Nfe2 (-4814)
ELK1_449	chr16	4881152	4881641	Mgrn1 (-4855), Fam100a (-1546)
ELK1_450	chr16	11252236	11253225	Gspt1 (+1687)
ELK1_451	chr16	13358781	13359433	NONE
ELK1_452	chr16	13668592	13669299	3110001I22Rik (-3005), Bfar (-3005), Parn (-683)
ELK1_453	chr16	14158745	14159122	Nde1 (-4434), 4921513D23Rik (+433)
ELK1_454	chr16	15636924	15637930	Prkdc (-532), Mcm4 (+66)
ELK1_455	chr16	16984041	16984695	Mapk1 (+893)
ELK1_456	chr16	17508750	17509358	Lztr1 (-10)
ELK1_457	chr16	17558594	17559058	P2rx6 (-3152), 4930451C15Rik (+2514)
ELK1_458	chr16	18811602	18812516	Ufd1l (-328), Cdc45 (+6)
ELK1_459	chr16	20610932	20611772	Alg3 (-530), Ece2 (-322)
ELK1_460	chr16	21945966	21946962	Tmem41a (+1161)
ELK1_461	chr16	28752414	28752892	NONE
ELK1_462	chr16	30066151	30066798	Hes1 (+1032)
ELK1_463	chr16	31080097	31080756	AI480653 (+1091)
ELK1_464	chr16	32608067	32608917	Tfrc (-490)
ELK1_465	chr16	35869750	35870350	Parp14 (+1418)
ELK1_466	chr16	35938408	35939596	Dtx3l (+111), Parp9 (+446)
ELK1_467	chr16	38522782	38523718	4930455C21Rik (-503)
ELK1_468	chr16	46010881	46011366	Plcxd2 (-598)
ELK1_469	chr16	59638790	59639076	Arl6 (+232)
ELK1_470	chr16	90142617	90142992	Sod1 (-78182)
ELK1_471	chr16	91367101	91367838	Ifnar2 (-5558)
ELK1_472	chr16	91373816	91374694	Ifnar2 (+1227)
ELK1_473	chr16	91378150	91378964	Il10rb (-27923), Ifnar2 (+5529)
ELK1_474	chr16	93629163	93629631	Cbr3 (-54067), Cbr1 (+21315)
ELK1_475	chr16	94747060	94747568	Dscr3 (+922)
ELK1_476	chr17	5117410	5118078	NONE
ELK1_477	chr17	5493623	5494264	Zdhhc14 (+1344)
ELK1_478	chr17	8504567	8505615	Sft2d1 (+1123)
ELK1_479	chr17	11033949	11035211	Pacrg (-1523), Park2 (+1330)
ELK1_480	chr17	15700936	15701931	Prdm9 (-1139)
ELK1_481	chr17	17762102	17763021	Lnpep (-1109)
ELK1_482	chr17	23723196	23723639	Zfp213 (-22225), Zfp13 (+13036)
ELK1_483	chr17	23810323	23810816	Cldn6 (-5762), Hcfc1r1 (-5), Thoc6 (+167)
ELK1_484	chr17	24388503	24389413	Ccnf (-604)
ELK1_485	chr17	24552015	24552548	Rnps1 (+662)
ELK1_486	chr17	24584758	24586288	Dnase1l2 (-5477)
ELK1_487	chr17	24872599	24873479	Sepx1 (-548)
ELK1_488	chr17	25151425	25152282	Ift140 (-1177), Cramp1l (+321)
ELK1_489	chr17	25152951	25153766	Cramp1l (-1184), Ift140 (+328)
ELK1_490	chr17	25170599	25171546	Ift140 (+18042), Tmem204 (+46986)
ELK1_491	chr17	25219299	25220797	Tmem204 (-1989)
ELK1_492	chr17	25930116	25931079	Fam173a (-1369)
ELK1_493	chr17	25965227	25966750	Jmjd8 (+1)
ELK1_494	chr17	26649677	26650385	Dusp1 (-4614)
ELK1_495	chr17	26980559	26981888	Nkx2-5 (-2714)
ELK1_496	chr17	27701703	27702494	AI413582 (+573)
ELK1_497	chr17	27758767	27759575	Nudt3 (+1226)
ELK1_498	chr17	28218233	28219383	Tcp11 (-1279)
ELK1_499	chr17	29406140	29406937	Ppil1 (-5623), BC004004 (+806)
ELK1_500	chr17	29993558	29994487	Mdga1 (+30804)
ELK1_501	chr17	31432637	31432921	Slc37a1 (+351)
ELK1_502	chr17	31433801	31434638	Slc37a1 (+1792)
ELK1_503	chr17	31995160	31996071	Sik1 (-2879)
ELK1_504	chr17	33083823	33084734	Cyp4f13 (+27)
ELK1_505	chr17	33897242	33897847	Rab11b (-114)
ELK1_506	chr17	34080078	34080721	H2-Ke2 (-3112), Wdr46 (+2732)
ELK1_507	chr17	34087108	34088130	Vps52 (-5208), B3galt4 (+814)
ELK1_508	chr17	34260176	34261235	Brd2 (-2014)
ELK1_509	chr17	34261697	34262024	Brd2 (-3169)
ELK1_510	chr17	34763106	34763851	Prrt1 (-3152), Ppt2 (+563)
ELK1_511	chr17	35154499	35155131	D17H6S56E-3 (+1291)
ELK1_512	chr17	35336467	35337902	Tnf (+1756)
ELK1_513	chr17	35379821	35380510	Bat1a (+1475)
ELK1_514	chr17	35957911	35959225	Flot1 (-1734), Ier3 (-90)
ELK1_515	chr17	36109167	36110143	Abcf1 (-2960)
ELK1_516	chr17	37087665	37088175	Ppp1r11 (+817)
ELK1_517	chr17	45872092	45872508	1600014C23Rik (-1507)
ELK1_518	chr17	45910344	45911197	1600014C23Rik (-39978)
ELK1_519	chr17	46289396	46290381	Mad2l1bp (+611)
ELK1_520	chr17	46690628	46691943	Srf (+1825)
ELK1_521	chr17	46815995	46816502	Rrp36 (-5045), Mea1 (-1837), Klhdc3 (+1630)
ELK1_522	chr17	47432406	47433027	Mrps10 (-73119), Trerf1 (+65538)
ELK1_523	chr17	47748239	47749436	Bysl (-397), Med20 (+293)
ELK1_524	chr17	47824412	47824996	Tomm6 (+631)
ELK1_525	chr17	49567447	49568606	Mocs1 (+338)
ELK1_526	chr17	56322499	56323240	D17Wsu104e (+473)
ELK1_527	chr17	56397823	56398707	Fem1a (+2049)
ELK1_528	chr17	56427706	56428007	Plin3 (+2077)
ELK1_529	chr17	56428564	56429485	Plin3 (+909)
ELK1_530	chr17	56748675	56749632	Rpl36 (-3664), 2410015M20Rik (+40)
ELK1_531	chr17	57386707	57387295	Trip10 (-1873), Gpr108 (+63)
ELK1_532	chr17	63846486	63847256	Fbxl17 (+3058)
ELK1_533	chr17	66232568	66233571	Ralbp1 (+1193)
ELK1_534	chr17	72101378	72102566	BC027072 (+253)
ELK1_535	chr17	72130302	72131515	Clip4 (-378)
ELK1_536	chr17	73187311	73188305	Ypel5 (+1764)
ELK1_537	chr17	79133993	79135193	Strn (+1307)
ELK1_538	chr17	79280423	79281117	Eif2ak2 (+1142)
ELK1_539	chr17	80461747	80462653	Hnrpll (-526)
ELK1_540	chr17	80606973	80607519	Srsf7 (-601)
ELK1_541	chr17	87151987	87152412	Epas1 (-1004)
ELK1_542	chr17	87356988	87357815	Rhoq (-5049)
ELK1_543	chr18	12463292	12463824	Ankrd29 (+671)
ELK1_544	chr18	24147767	24148490	Zfp35 (-6)
ELK1_545	chr18	24491911	24492356	NONE
ELK1_546	chr18	32298876	32299479	Proc (-1319)
ELK1_547	chr18	34489839	34490187	Srp19 (-786)
ELK1_548	chr18	34697785	34698409	Wnt8a (-3885)
ELK1_549	chr18	35899474	35900043	Tmem173 (+449)
ELK1_550	chr18	36919302	36920222	Wdr55 (-131)
ELK1_551	chr18	37965333	37965772	NONE
ELK1_552	chr18	38456819	38457460	Rnf14 (+851)
ELK1_553	chr18	43554142	43554684	Dpysl3 (-1428)
ELK1_554	chr18	46757542	46758392	Tmed7 (-778), Eif1a (+609)
ELK1_555	chr18	60763460	60764500	Myoz3 (-12610), Synpo (+25759)
ELK1_556	chr18	60787145	60787807	Synpo (+2263)
ELK1_557	chr18	61666604	61666889	Arhgef37 (+29443)
ELK1_558	chr18	62112949	62113533	Sh3tc2 (+512)
ELK1_559	chr18	74020724	74021229	Mro (+1936)
ELK1_560	chr18	75977212	75977994	Zbtb7c (-2229)
ELK1_561	chr18	80431577	80432056	Hsbp1l1 (+12024), Naa10 (+27924)
ELK1_562	chr18	84757479	84758241	Zfp407 (+1036)
ELK1_563	chr18	84853373	84853877	Cndp2 (+1400)
ELK1_564	chr19	3324267	3325301	Cpt1a (+1483)
ELK1_565	chr19	3707706	3708102	1810055G02Rik (-429)
ELK1_566	chr19	3846641	3847717	Chka (-4594)
ELK1_567	chr19	3911928	3913180	Tcirg1 (-5421), Ndufs8 (+163)
ELK1_568	chr19	3999327	4000400	Doc2g (-3521), Nudt8 (-716)
ELK1_569	chr19	4058891	4059726	BC021614 (-15)
ELK1_570	chr19	4096345	4097303	Pitpnm1 (-3293), Cdk2ap2 (-527)
ELK1_571	chr19	4792799	4794062	Rbm14 (+18203), Rbm4b (+36906)
ELK1_572	chr19	4839530	4840346	Ccs (-616), Ccdc87 (+572)
ELK1_573	chr19	5273771	5274393	Pacs1 (-963)
ELK1_574	chr19	5433819	5434379	Fosl1 (-13599), AI837181 (+8955)
ELK1_575	chr19	5488102	5490147	Cfl1 (-1330), Mus81 (-789)
ELK1_576	chr19	5636391	5637116	Rela (-736)
ELK1_577	chr19	5729912	5731220	Ehbp1l1 (-4249), Mtvr2 (+146), Sssca1 (+1155)
ELK1_578	chr19	6014723	6015043	Capn1 (+364)
ELK1_579	chr19	6398935	6399405	Rasgrp2 (-1413)
ELK1_580	chr19	6932891	6933243	Ccdc88b (-366)
ELK1_581	chr19	7069446	7070278	Dnajc4 (-3100), Trpt1 (-759), Nudt22 (+665)
ELK1_582	chr19	7280815	7281569	Otub1 (-418)
ELK1_583	chr19	8971843	8973070	Ganab (-144)
ELK1_584	chr19	10270847	10271383	Fen1 (+7318), Fads1 (+13737)
ELK1_585	chr19	11985923	11986818	Patl1 (-518)
ELK1_586	chr19	34329087	34329486	Acta2 (+539)
ELK1_587	chr19	38128504	38129077	Cep55 (-724)
ELK1_588	chr19	40344747	40345280	Pdlim1 (+1092)
ELK1_589	chr19	41282766	41283573	Tll2 (-1906)
ELK1_590	chr19	41555927	41556332	Pik3ap1 (-96570), Lcor (-67999)
ELK1_591	chr19	42688506	42688981	Loxl4 (-1448)
ELK1_592	chr19	42825950	42827236	Pyroxd2 (+672)
ELK1_593	chr19	43596669	43597400	Got1 (+2060)
ELK1_594	chr19	43598024	43599385	Got1 (+390)
ELK1_595	chr19	43747399	43748501	Slc25a28 (+1421)
ELK1_596	chr19	46412666	46413128	Cuedc2 (+253)
ELK1_597	chr19	46745288	46745913	Cyp17a1 (+1889)
ELK1_598	chr19	47539421	47540073	Sh3pxd2a (-846)
ELK1_599	chr19	47654647	47655418	Slk (+524)
ELK1_600	chr19	47993981	47994406	Itprip (-405)
ELK1_601	chr19	53112027	53112701	Xpnpep1 (+668)
ELK1_602	chr19	53526863	53527421	Dusp5 (-76666), Smndc1 (-62079)
ELK1_603	chr19	53604679	53605390	Dusp5 (+1227)
ELK1_604	chr19	55327845	55328465	Acsl5 (+296)
ELK1_605	chr19	55918740	55919452	Ppnr (-1286)
ELK1_606	chr2	4933728	4935649	Mcm10 (-852)
ELK1_607	chr2	11626312	11627127	Il15ra (-755)
ELK1_608	chr2	17959070	17959504	A930004D18Rik (+81)
ELK1_609	chr2	25038514	25039014	Nrarp (+2486)
ELK1_610	chr2	25048967	25049678	A830007P12Rik (+3010), Nrarp (+13045)
ELK1_611	chr2	26757730	26758896	Surf6 (+20)
ELK1_612	chr2	26762413	26762913	Surf6 (-4330), Rpl7a (-3664)
ELK1_613	chr2	26763291	26763906	Surf6 (-5266), Rpl7a (-2728)
ELK1_614	chr2	26764339	26764818	Surf6 (-6246), Rpl7a (-1748), Med22 (+1583)
ELK1_615	chr2	27370137	27370707	Wdr5 (-245)
ELK1_616	chr2	29102202	29102916	Ntng2 (+1001)
ELK1_617	chr2	30060164	30062880	Ccbl1 (-303)
ELK1_618	chr2	30092302	30092824	Lrrc8a (-726)
ELK1_619	chr2	30141079	30141727	Nup188 (-550), Dolk (+471)
ELK1_620	chr2	30213412	30213987	Fam73b (-6155), Sh3glb2 (+1051)
ELK1_621	chr2	30702128	30702467	Prrx2 (+1411)
ELK1_622	chr2	31801634	31802169	Aif1l (-3921)
ELK1_623	chr2	32236481	32236873	1110008P14Rik (+758)
ELK1_624	chr2	32426076	32426385	Pip5kl1 (-5108), Dpm2 (-147)
ELK1_625	chr2	33070584	33071167	Angptl2 (-605)
ELK1_626	chr2	34987492	34988284	Cep110 (+22876), Rab14 (+68752)
ELK1_627	chr2	35351476	35352222	Ggta1 (-34904)
ELK1_628	chr2	37635813	37636909	Crb2 (+4592)
ELK1_629	chr2	51004762	51005722	Rnd3 (-611)
ELK1_630	chr2	57089007	57089925	Gpd2 (-623)
ELK1_631	chr2	58420132	58420633	Acvr1 (-1144)
ELK1_632	chr2	59451194	59451520	Tanc1 (+1256)
ELK1_633	chr2	62484258	62484659	Ifih1 (-147)
ELK1_634	chr2	77655709	77656089	Zfp385b (-1026)
ELK1_635	chr2	80419117	80420460	Nckap1 (+1333)
ELK1_636	chr2	84489953	84490633	Ctnnd1 (+604)
ELK1_637	chr2	90686427	90686673	Mtch2 (-762)
ELK1_638	chr2	91489683	91492180	Zfp408 (-984), Arhgap1 (+657)
ELK1_639	chr2	91564954	91565430	Ambra1 (-5103)
ELK1_640	chr2	91867953	91869402	Creb3l1 (-4351)
ELK1_641	chr2	92299435	92300086	Slc35c1 (+914)
ELK1_642	chr2	93304193	93304758	Cd82 (-1373)
ELK1_643	chr2	104429898	104430850	Cstf3 (-267)
ELK1_644	chr2	109858244	109858500	Ccdc34 (+398)
ELK1_645	chr2	112107428	112108383	Slc12a6 (+1435)
ELK1_646	chr2	112333975	112334329	Aven (+1031)
ELK1_647	chr2	113688578	113689096	Arhgap11a (-19)
ELK1_648	chr2	118605600	118605933	Disp2 (+312)
ELK1_649	chr2	119301981	119302651	Ino80 (+1049)
ELK1_650	chr2	119622884	119623387	Tyro3 (-2114)
ELK1_651	chr2	119979268	119979562	Ehd4 (+896)
ELK1_652	chr2	121282413	121282809	2310003F16Rik (-213), Serinc4 (-111)
ELK1_653	chr2	122454505	122455035	Spata5l1 (-1592)
ELK1_654	chr2	122455382	122456189	Spata5l1 (-576)
ELK1_655	chr2	126895618	126896084	Blvra (-542)
ELK1_656	chr2	128954438	128955166	Chchd5 (-634)
ELK1_657	chr2	130099681	130100300	Nop56 (-157)
ELK1_658	chr2	130249927	130250331	Vps16 (+73), Fam113a (+248)
ELK1_659	chr2	131181667	131182030	Rnf24 (-3221)
ELK1_660	chr2	144284236	144284874	6330439K17Rik (+68579), Csrp2bp (+89836)
ELK1_661	chr2	146682045	146682496	Plk1s1 (+646)
ELK1_662	chr2	148599908	148600704	Cst11 (-3073)
ELK1_663	chr2	150188218	150189155	ZIPO-III (-186)
ELK1_664	chr2	150573895	150574623	Entpd6 (-558)
ELK1_665	chr2	151803790	151804908	Fam110a (+1606)
ELK1_666	chr2	151902222	151903368	Scrt2 (-4470)
ELK1_667	chr2	151931819	151932652	Srxn1 (+770)
ELK1_668	chr2	152241129	152241563	Zcchc3 (-566), 6820408C15Rik (+23)
ELK1_669	chr2	152431282	152431707	Defb36 (+1432)
ELK1_670	chr2	153057921	153059071	Tspyl3 (-7319), Plagl2 (+8598)
ELK1_671	chr2	155340789	155341163	Acss2 (-2803), Ggt7 (-394)
ELK1_672	chr2	155417171	155417882	Gss (+915)
ELK1_673	chr2	155652210	155653073	Eif6 (+19)
ELK1_674	chr2	156023079	156023765	Phf20 (+1039)
ELK1_675	chr2	156050059	156050647	4921517L17Rik (-87856), Phf20 (+27970)
ELK1_676	chr2	156373634	156374036	0610011L14Rik (+523)
ELK1_677	chr2	156902113	156903233	9830001H06Rik (+2328)
ELK1_678	chr2	156907144	156908697	Gm1332 (-4870), 9830001H06Rik (-2920)
ELK1_679	chr2	157192591	157193425	Manbal (-322)
ELK1_680	chr2	160558273	160559974	Plcg1 (+2078)
ELK1_681	chr2	162842452	162842791	Ift52 (-586)
ELK1_682	chr2	164647923	164648657	Zswim1 (+104)
ELK1_683	chr2	164703749	164704594	Pcif1 (-696)
ELK1_684	chr2	165112099	165112488	Slc35c2 (+1033)
ELK1_685	chr2	165113377	165113729	Slc35c2 (-226)
ELK1_686	chr2	167249378	167249673	Slc9a8 (+2305)
ELK1_687	chr2	167328219	167328546	Snai1 (-35344), Spata2 (-10009)
ELK1_688	chr2	167458391	167459839	Ube2v1 (-1610)
ELK1_689	chr2	167485935	167486378	Tmem189 (+887)
ELK1_690	chr2	172800822	172801232	Spo11 (-4316)
ELK1_691	chr2	173486160	173487006	Rab22a (+1237)
ELK1_692	chr2	174295223	174295547	Atp5e (-5783)
ELK1_693	chr2	174297726	174298164	Slmo2 (+497)
ELK1_694	chr2	179776115	179776562	Ss18l1 (-849), Psma7 (+768)
ELK1_695	chr2	179849364	179850398	Osbpl2 (-4190)
ELK1_696	chr2	179991046	179991381	Rps21 (-870)
ELK1_697	chr2	180008589	180009167	Cables2 (-708)
ELK1_698	chr2	180188487	180189839	Slco4a1 (-6520)
ELK1_699	chr2	180923606	180923967	Ppdpf (+1739)
ELK1_700	chr2	181113217	181114229	Lime1 (-756)
ELK1_701	chr2	181413718	181414667	Tcea2 (-822)
ELK1_702	chr3	28679271	28679558	Eif5a2 (-818)
ELK1_703	chr3	36761343	36761749	4932438A13Rik (-482)
ELK1_704	chr3	37318782	37319188	Nudt6 (-473), Spata5 (-217)
ELK1_705	chr3	40888715	40889553	Pgrmc2 (-2166)
ELK1_706	chr3	54916900	54917869	Spg20 (+1355)
ELK1_707	chr3	57649787	57650653	Pfn2 (+1459)
ELK1_708	chr3	79645276	79646125	Tmem144 (+883)
ELK1_709	chr3	87331158	87332945	Arhgef11 (-90621), Etv3 (+2552)
ELK1_710	chr3	87422029	87422847	Arhgef11 (-235)
ELK1_711	chr3	87423289	87425032	Arhgef11 (+1488)
ELK1_712	chr3	87651295	87652051	Sh2d2a (+996)
ELK1_713	chr3	87970258	87970706	Mef2d (+24165), Rhbg (+88124)
ELK1_714	chr3	88100639	88101703	1700021C14Rik (-411), Cct3 (+114)
ELK1_715	chr3	88128976	88129778	0610031J06Rik (+432)
ELK1_716	chr3	88297578	88300024	Sema4a (-33697), Lmna (+8453)
ELK1_717	chr3	88425789	88426370	Arhgef2 (+1052)
ELK1_718	chr3	89028026	89028377	Muc1 (-4772)
ELK1_719	chr3	90034749	90035372	Jtb (-458)
ELK1_720	chr3	90204639	90205317	Slc27a3 (-11129), Ints3 (+32580)
ELK1_721	chr3	90319557	90320473	S100a1 (-1763), S100a13 (+1335)
ELK1_722	chr3	93353799	93354329	S100a10 (-4975)
ELK1_723	chr3	94846249	94847473	Psmd4 (-394)
ELK1_724	chr3	95085784	95086603	Fam63a (-648), Prune (-196)
ELK1_725	chr3	95698363	95698725	BC028528 (-2691), Aph1a (+625)
ELK1_726	chr3	95975995	95976294	Sf3b4 (-328)
ELK1_727	chr3	95986344	95986878	Sv2a (+1461)
ELK1_728	chr3	96723372	96724240	Gpr89 (-14585), Gja8 (+6047)
ELK1_729	chr3	97456162	97456492	Prkab2 (-5808)
ELK1_730	chr3	103595639	103596005	Hipk1 (-624)
ELK1_731	chr3	104666194	104667359	St7l (-1222), Capza1 (+646)
ELK1_732	chr3	105490863	105491982	Ddx20 (-934)
ELK1_733	chr3	105674989	105675581	Adora3 (+1509)
ELK1_734	chr3	108059275	108060294	Psma5 (-59)
ELK1_735	chr3	108247240	108248161	Sars (+386)
ELK1_736	chr3	108457614	108458212	Clcc1 (+1005)
ELK1_737	chr3	115709471	115709910	Extl2 (-1524), Slc30a7 (+633)
ELK1_738	chr3	120995670	120996840	Alg14 (+1520)
ELK1_739	chr3	122816841	122817765	Myoz2 (-79398)
ELK1_740	chr3	123147343	123147725	Prss12 (-2297)
ELK1_741	chr3	127491948	127492513	Tifa (-600)
ELK1_742	chr3	135392226	135392727	Slc39a8 (-96144), Nfkb1 (-37966)
ELK1_743	chr3	137729361	137730939	Gm5105 (+202)
ELK1_744	chr3	138189137	138189940	Eif4e (+384)
ELK1_745	chr3	145314623	145316219	Cyr61 (-2472)
ELK1_746	chr3	145539047	145539856	Bcl10 (-47890)
ELK1_747	chr3	157699423	157700019	Srsf11 (-118), Lrrc40 (+54)
ELK1_748	chr4	3605132	3605568	Lyn (+82)
ELK1_749	chr4	9596518	9597548	Asph (-724)
ELK1_750	chr4	14790667	14790997	Tmem55a (-534)
ELK1_751	chr4	15886082	15886510	Nbn (+1182)
ELK1_752	chr4	32047183	32049140	Map3k7 (-2920)
[truncated: 467 more rows]

## Sheet: 8 - Dam-ELK4
peak	chromosome	start	end
[truncated: 1,401 more rows]

[truncated: 35 more sheets: 9 - ELK4-Dam, 10 - ELK4, 11 - Dam-SRF, 12 - SRF-Dam, 13 - SRF, 14 - GO Dam-NKX2-5, 15 - GO ELK1 and 4, 16 - GO SRF, 17 - GO NKX2-5Y191C off-targets, 18 - GO NKX2-5dHD off-targets, 19- GO NKX2-5 not ELK not SRF, 20 - GO ELK not NKX2-5 not SRF, 21 - GO SRF not NKX2-5 not ELK, 22 - GO NKX2-5 and ELK not SRF, 23 - GO NKX2-5 and SRF not ELK, 24 - GO ELK and SRF not NKX2-5, 25 - GO NKX2-5 and ELK and SRF, 26- Trawler DAM-NKX2-5, 27- Trawler DAM-NKX2-5Y191C, 28- Trawler DAM-NKX2-5dHD …]
