# Supplementary figures and images for: NKX2-5 mutations causative for congenital heart disease retain functionality and are directed to hundreds of targets
Source: eLife journal article supplement (doi:10.7554/elife.06942), 2015-07-06

Bouveret\_Figure 1-figure Supplement 3

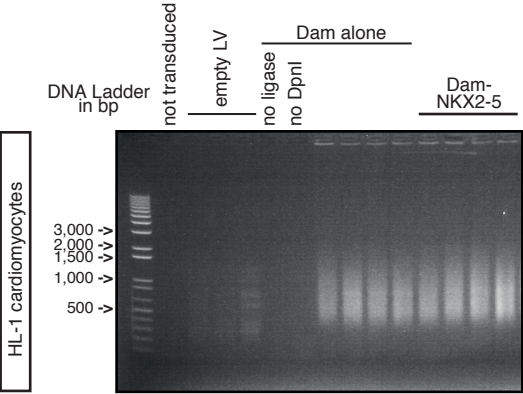

Supplement: supp [file elife-06942-supp-v1.zip › elife_poa_e06942_Figure_1_figure_supplement_3.pdf]

Bouveret\_Figure 1-figure Supplement 7

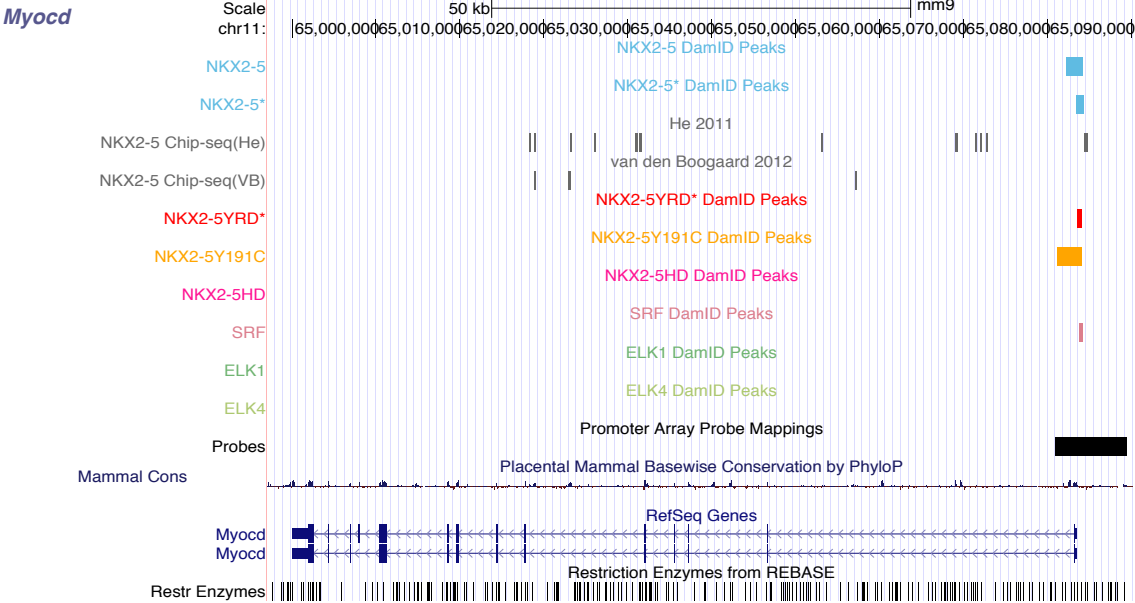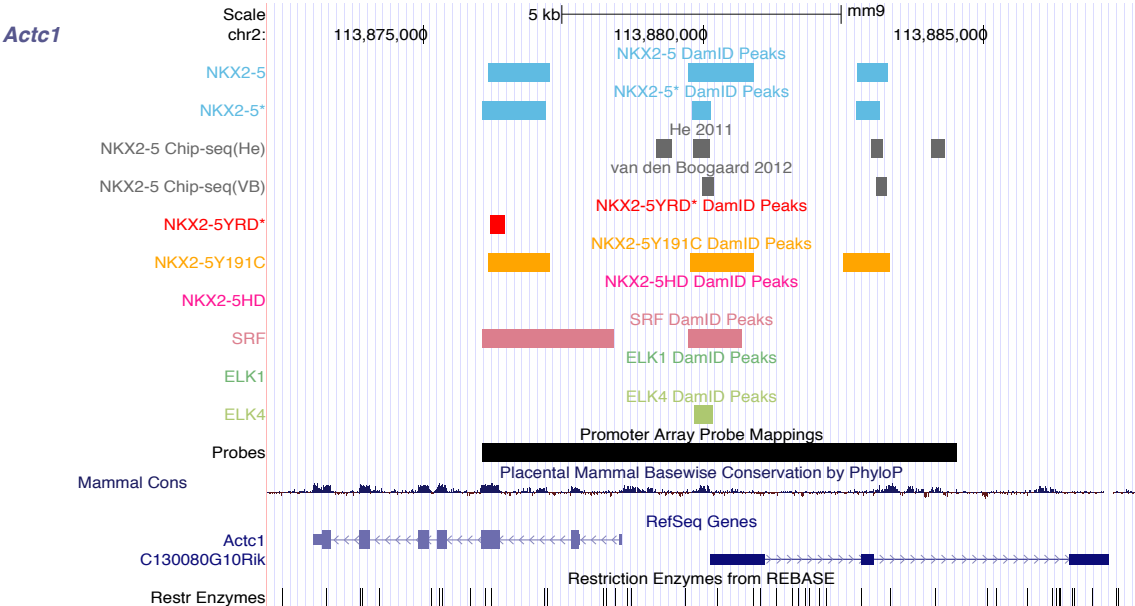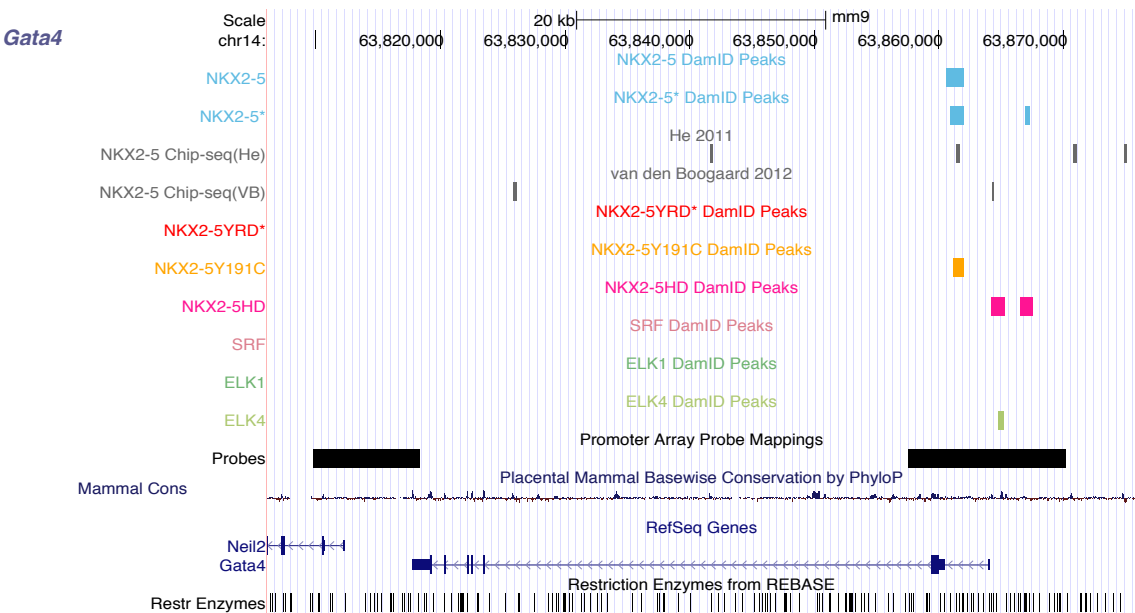

Supplement: supp [file elife-06942-supp-v1.zip › elife_poa_e06942_Figure_1_figure_supplement_7.pdf]

Bouveret\_Figure 4-figure Supplement 1

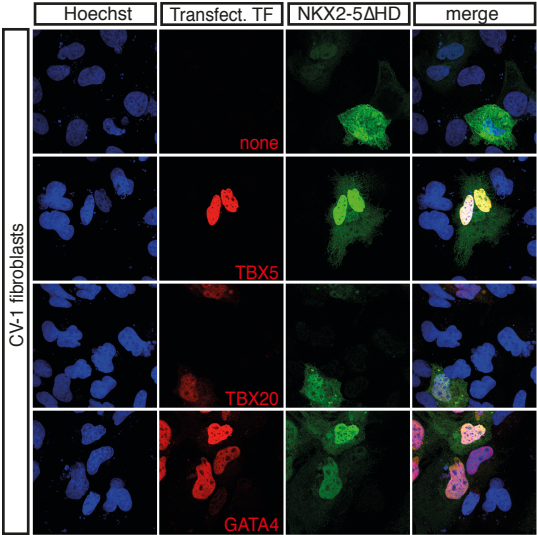

Supplement: supp [file elife-06942-supp-v1.zip › elife_poa_e06942_Figure_4_figure_supplement_1.pdf]

Bouveret\_Figure 3-figure Supplement 1

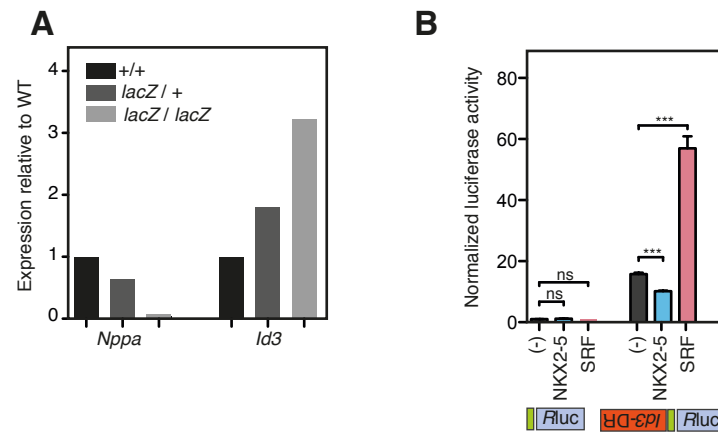

Supplement: supp [file elife-06942-supp-v1.zip › elife_poa_e06942_Figure_3_figure_supplement_1.pdf]

Bouveret\_Figure 1-figure Supplement 4

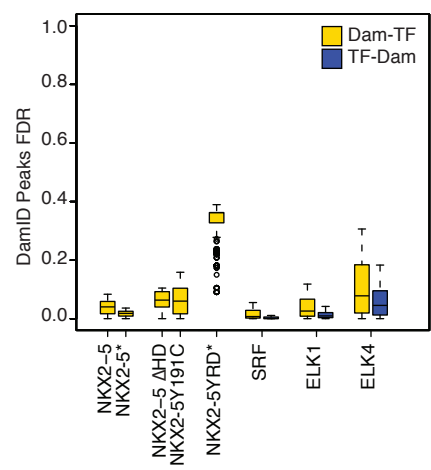

Supplement: supp [file elife-06942-supp-v1.zip › elife_poa_e06942_Figure_1_figure_supplement_4.pdf]

Bouveret\_Figure 1-figure Supplement 6

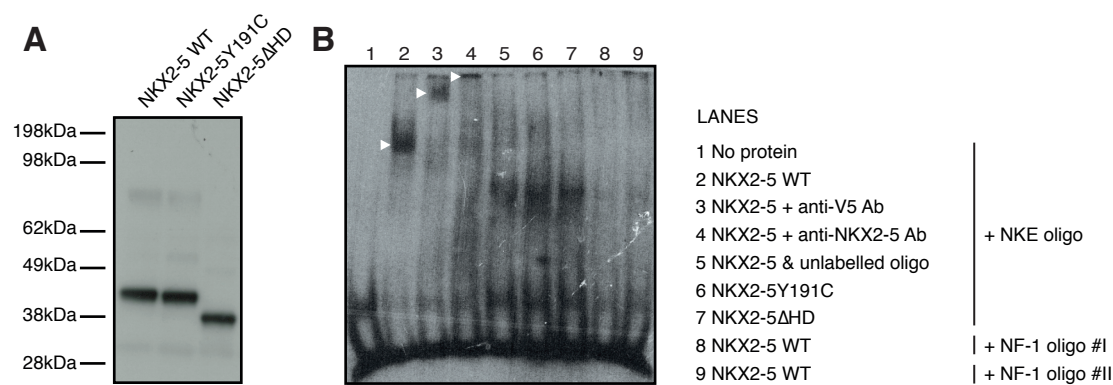

Supplement: supp [file elife-06942-supp-v1.zip › elife_poa_e06942_Figure_1_figure_supplement_6.pdf]

Bouveret\_Figure 5-figure Supplement 1

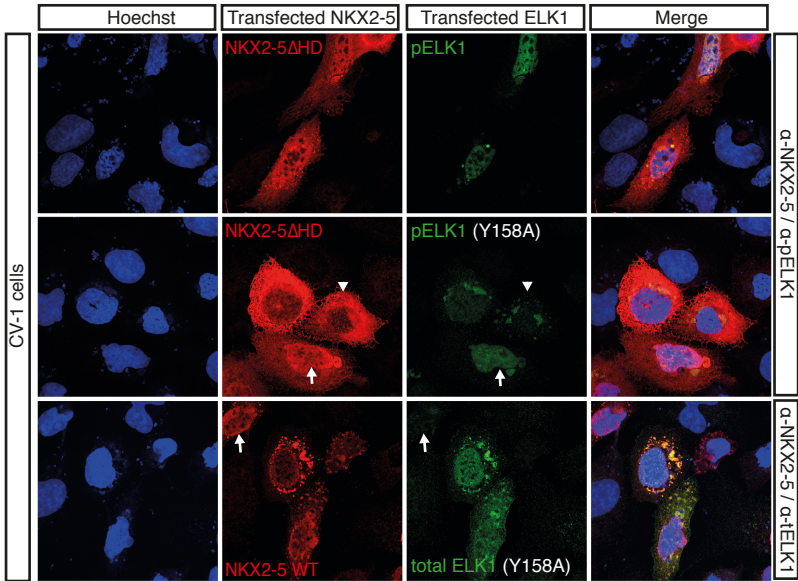

Supplement: supp [file elife-06942-supp-v1.zip › elife_poa_e06942_Figure_5_figure_supplement_1.pdf]

Bouveret\_Figure 1-figure Supplement 9

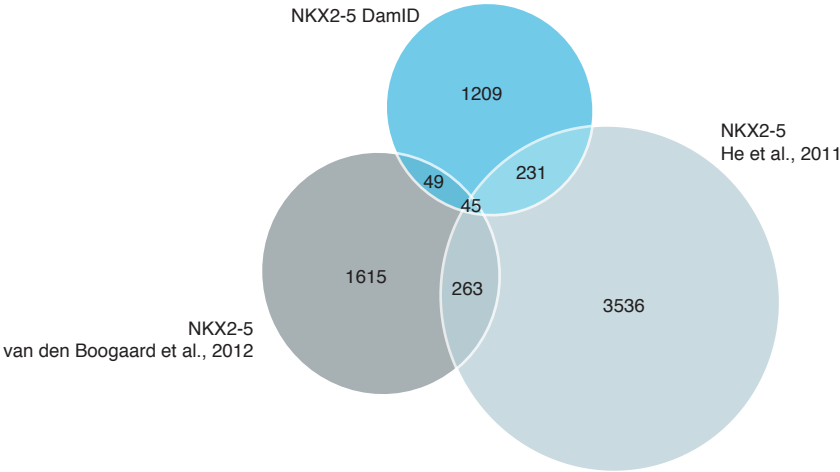

Supplement: supp [file elife-06942-supp-v1.zip › elife_poa_e06942_Figure_1_figure_supplement_9.pdf]

# Bouveret\_Figure 2-figure Supplement 2

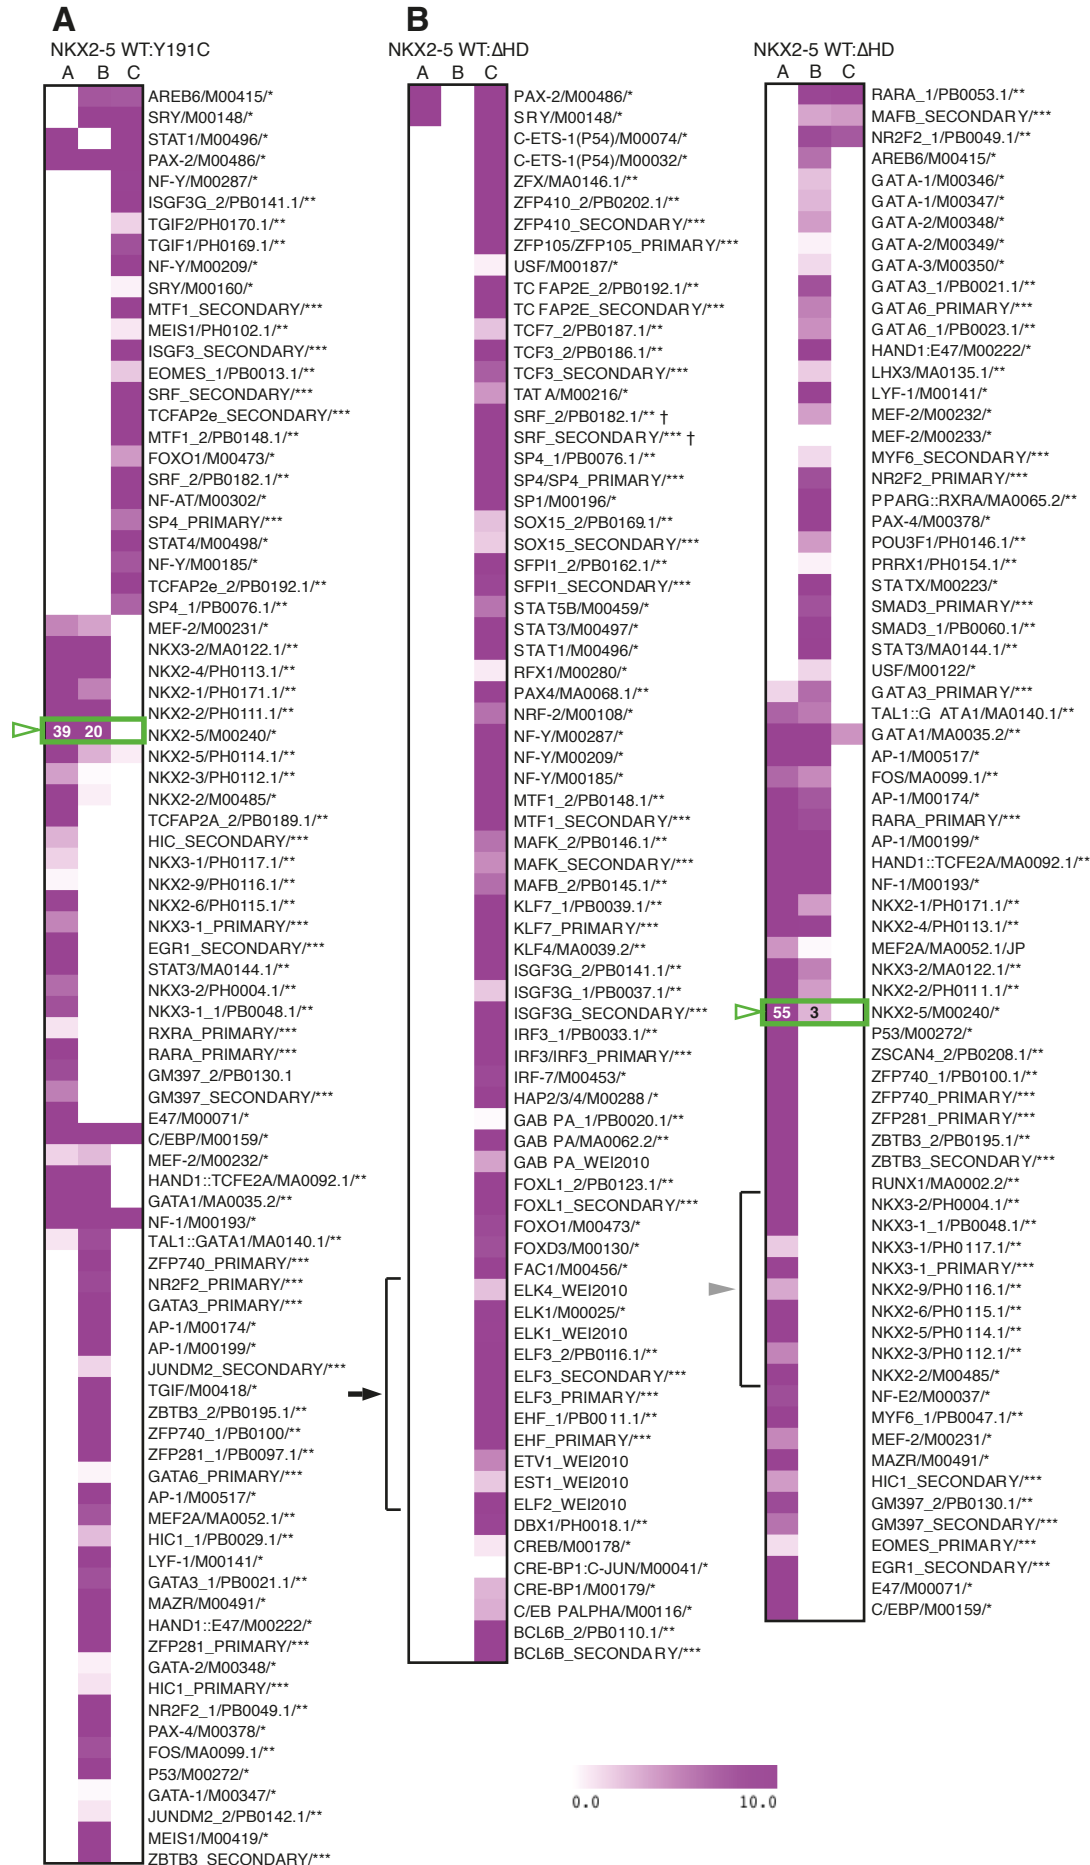

Supplement: supp [file elife-06942-supp-v1.zip › elife_poa_e06942_Figure_2_figure_supplement_2.pdf]

Bouveret\_Figure 1-figure Supplement 5

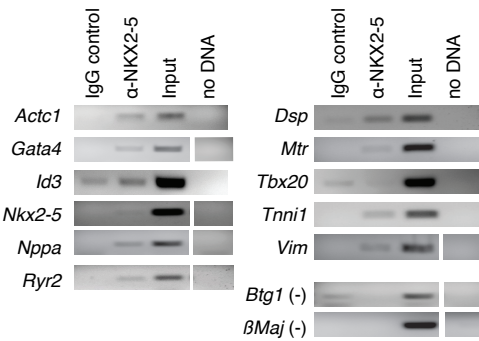

Supplement: supp [file elife-06942-supp-v1.zip › elife_poa_e06942_Figure_1_figure_supplement_5.pdf]

Bouveret\_Figure 2-figure Supplement 3

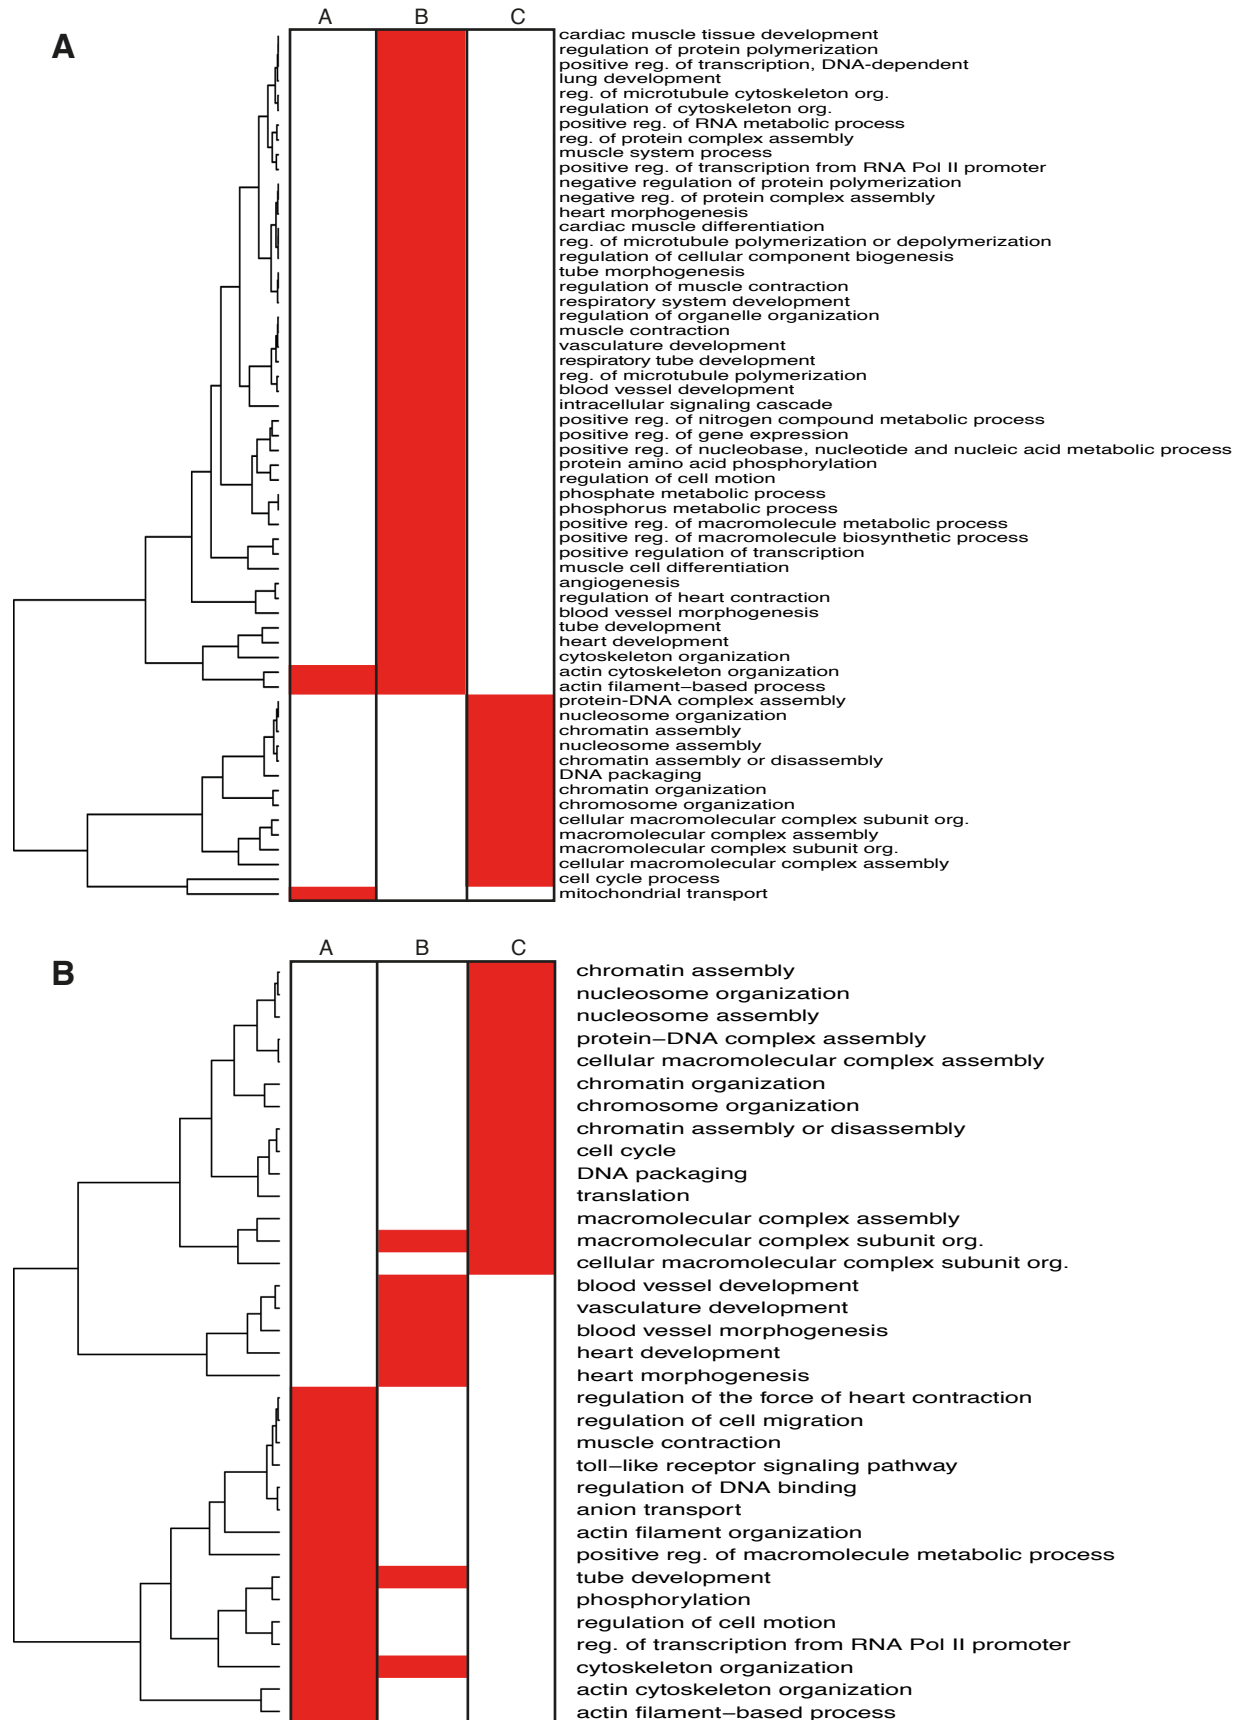

Supplement: supp [file elife-06942-supp-v1.zip › elife_poa_e06942_Figure_2_figure_supplement_3.pdf]

Bouveret\_Figure 4-figure Supplement 2

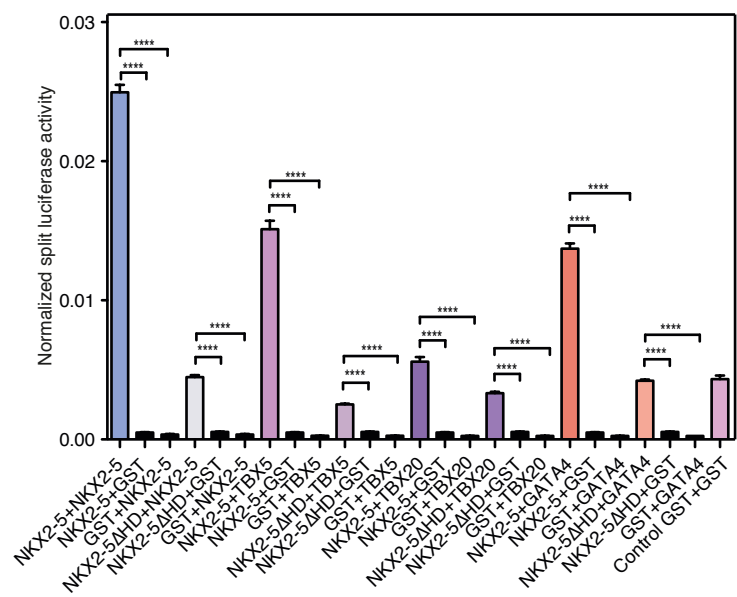

Supplement: supp [file elife-06942-supp-v1.zip › elife_poa_e06942_Figure_4_figure_supplement_2.pdf]

# Bouveret\_Figure 2-figure Supplement 1

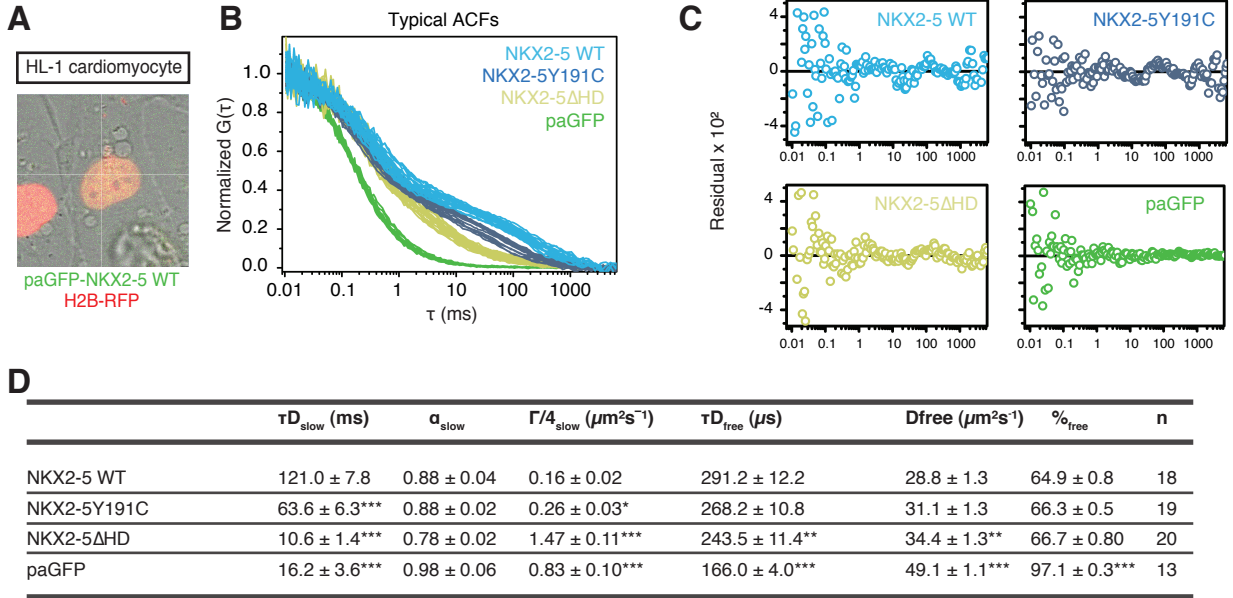

Supplement: supp [file elife-06942-supp-v1.zip › elife_poa_e06942_Figure_2_figure_supplement_1.pdf]

Bouveret\_Figure 1-figure Supplement 2

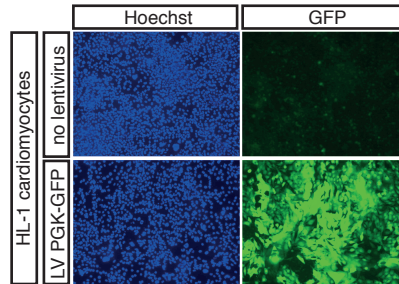

Supplement: supp [file elife-06942-supp-v1.zip › elife_poa_e06942_Figure_1_figure_supplement_2.pdf]

Bouveret\_Figure 4-figure Supplement 3

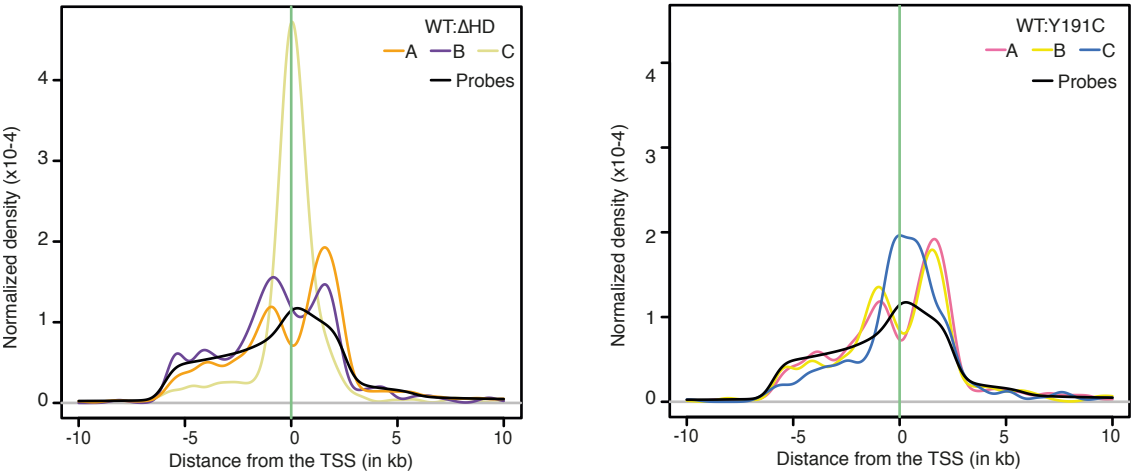

Supplement: supp [file elife-06942-supp-v1.zip › elife_poa_e06942_Figure_4_figure_supplement_3.pdf]

Bouveret\_Figure 1-figure Supplement 8

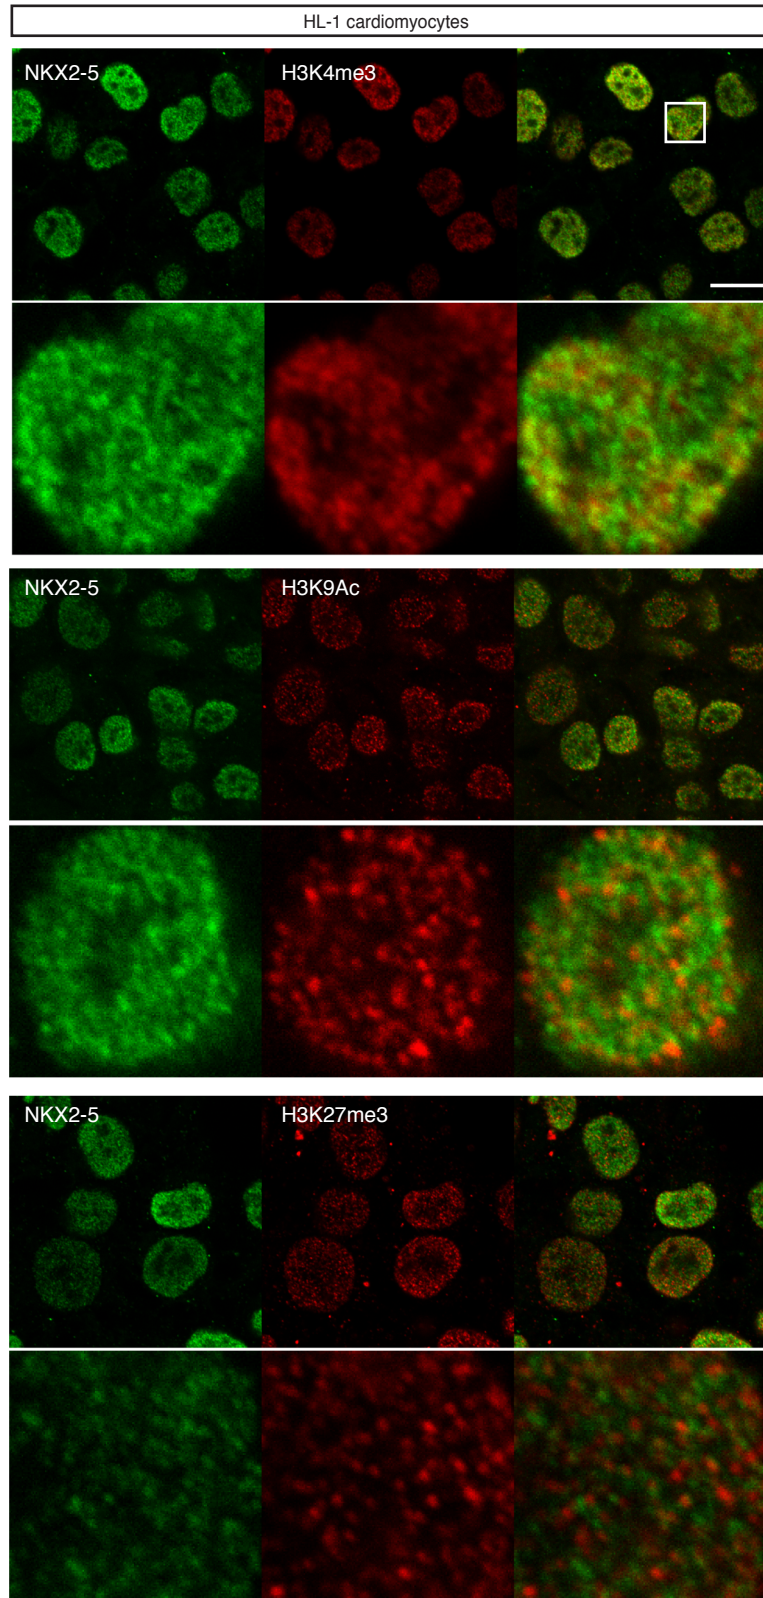

Supplement: supp [file elife-06942-supp-v1.zip › elife_poa_e06942_Figure_1_figure_supplement_8.pdf]

Bouveret\_Figure 1-figure Supplement 1

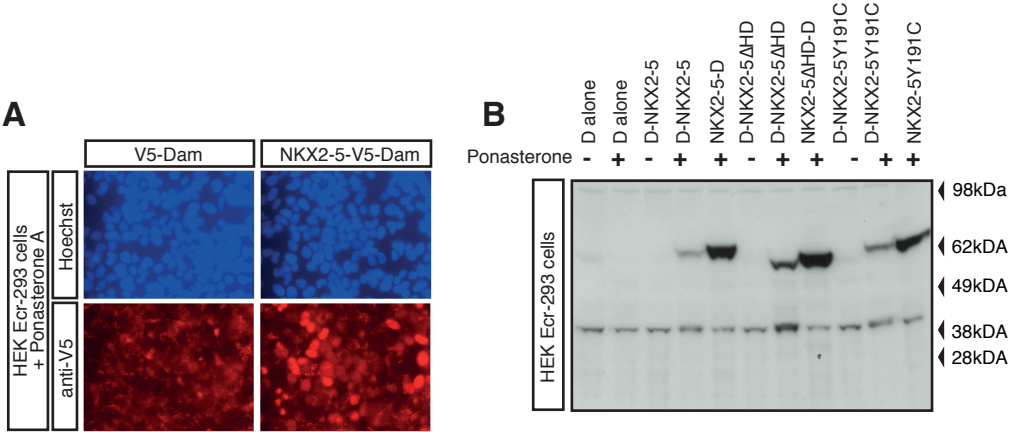

Supplement: supp [file elife-06942-supp-v1.zip › elife_poa_e06942_Figure_1_figure_supplement_1.pdf]

Bouveret\_Figure 3-figure Supplement 2

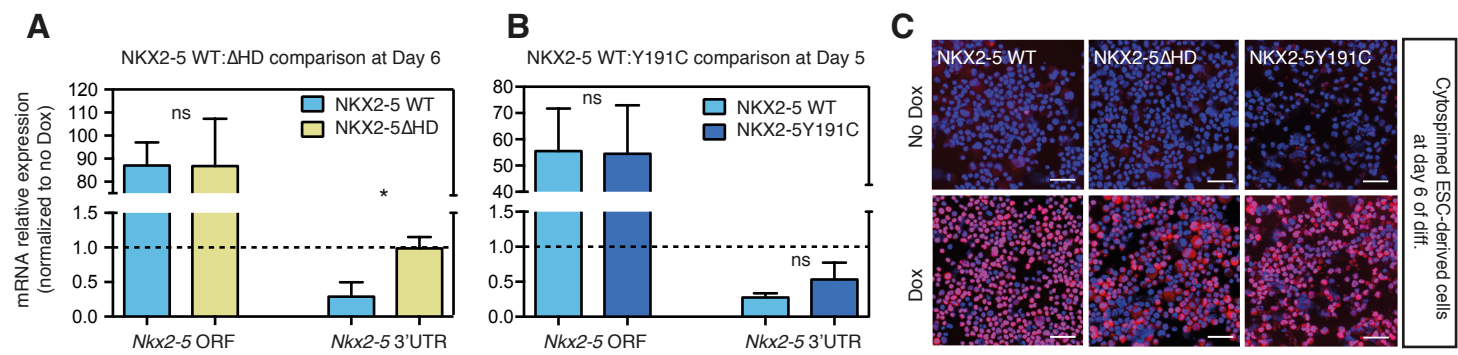

Supplement: supp [file elife-06942-supp-v1.zip › elife_poa_e06942_Figure_3_figure_supplement_2.pdf]

Bouveret\_Figure 5-  
figure Supplement 2

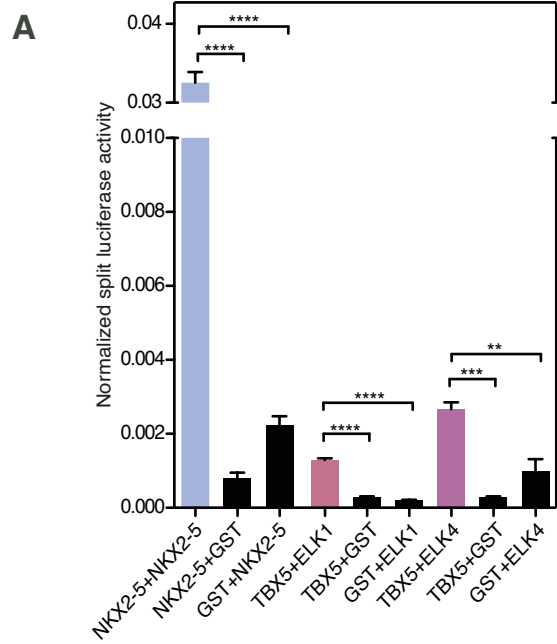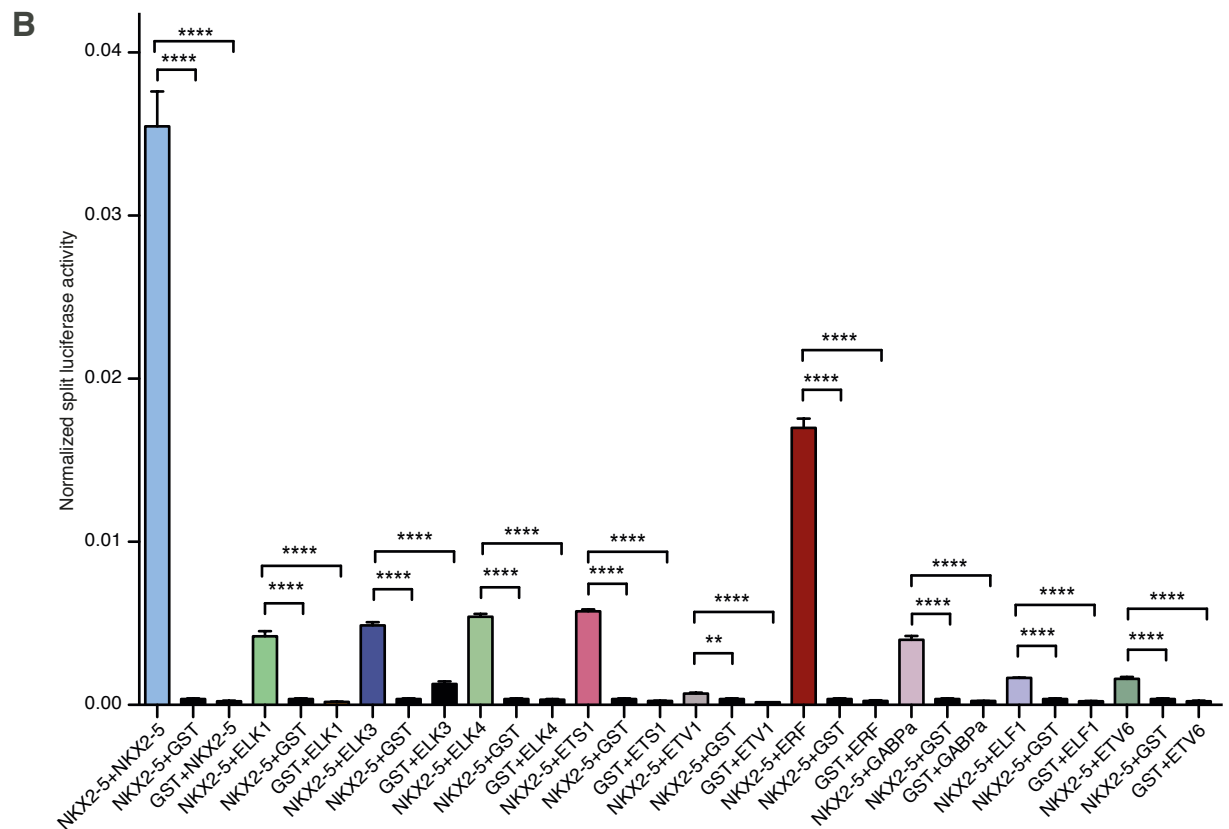

Supplement: supp [file elife_poa_e06942_Figure_5_figure_supplement_2.pdf › elife_poa_e06942_Figure_5_figure_supplement_2.pdf]
